# Supplementary material
Source: PubMed Central journal article supplement (PMC3448811)
Supplement: NIHMS400123-supplement-01.pdf [file NIHMS400123-supplement-01.pdf]

# Supporting Information

## **Antibacterial activities of Groebke-Blackburn-Bienaymé-derived imidazo[1,2-*a*]pyridin-3-amines**

Nikunj M. Shukla, Deepak B. Salunke, Euna Yoo, Cole A. Mutz,  
Rajalakshmi Balakrishna, and Sunil A. David\*

Department of Medicinal Chemistry,  
University of Kansas.

# 1a <sup>1</sup>H Spectrum

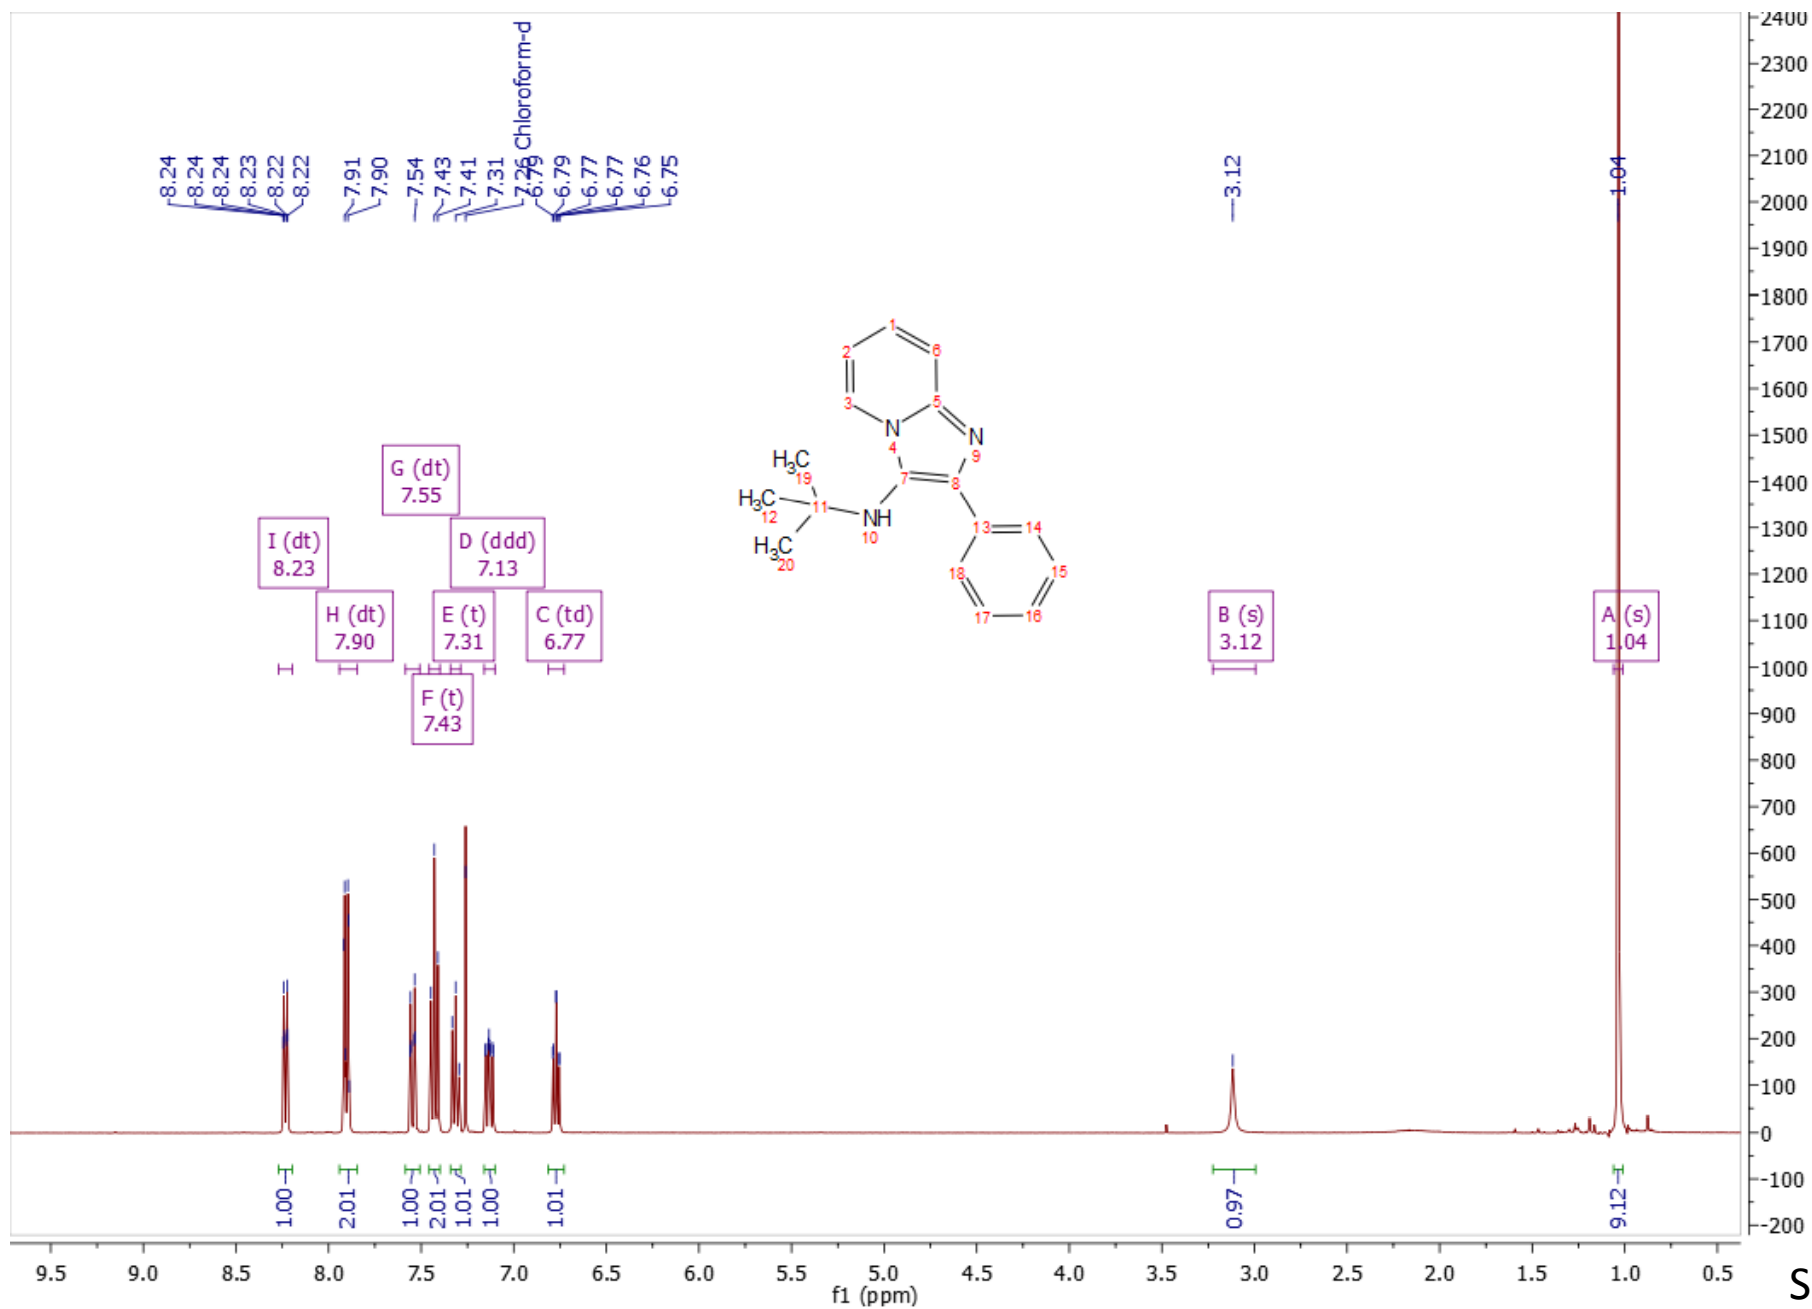

# 1a <sup>13</sup>C Spectrum

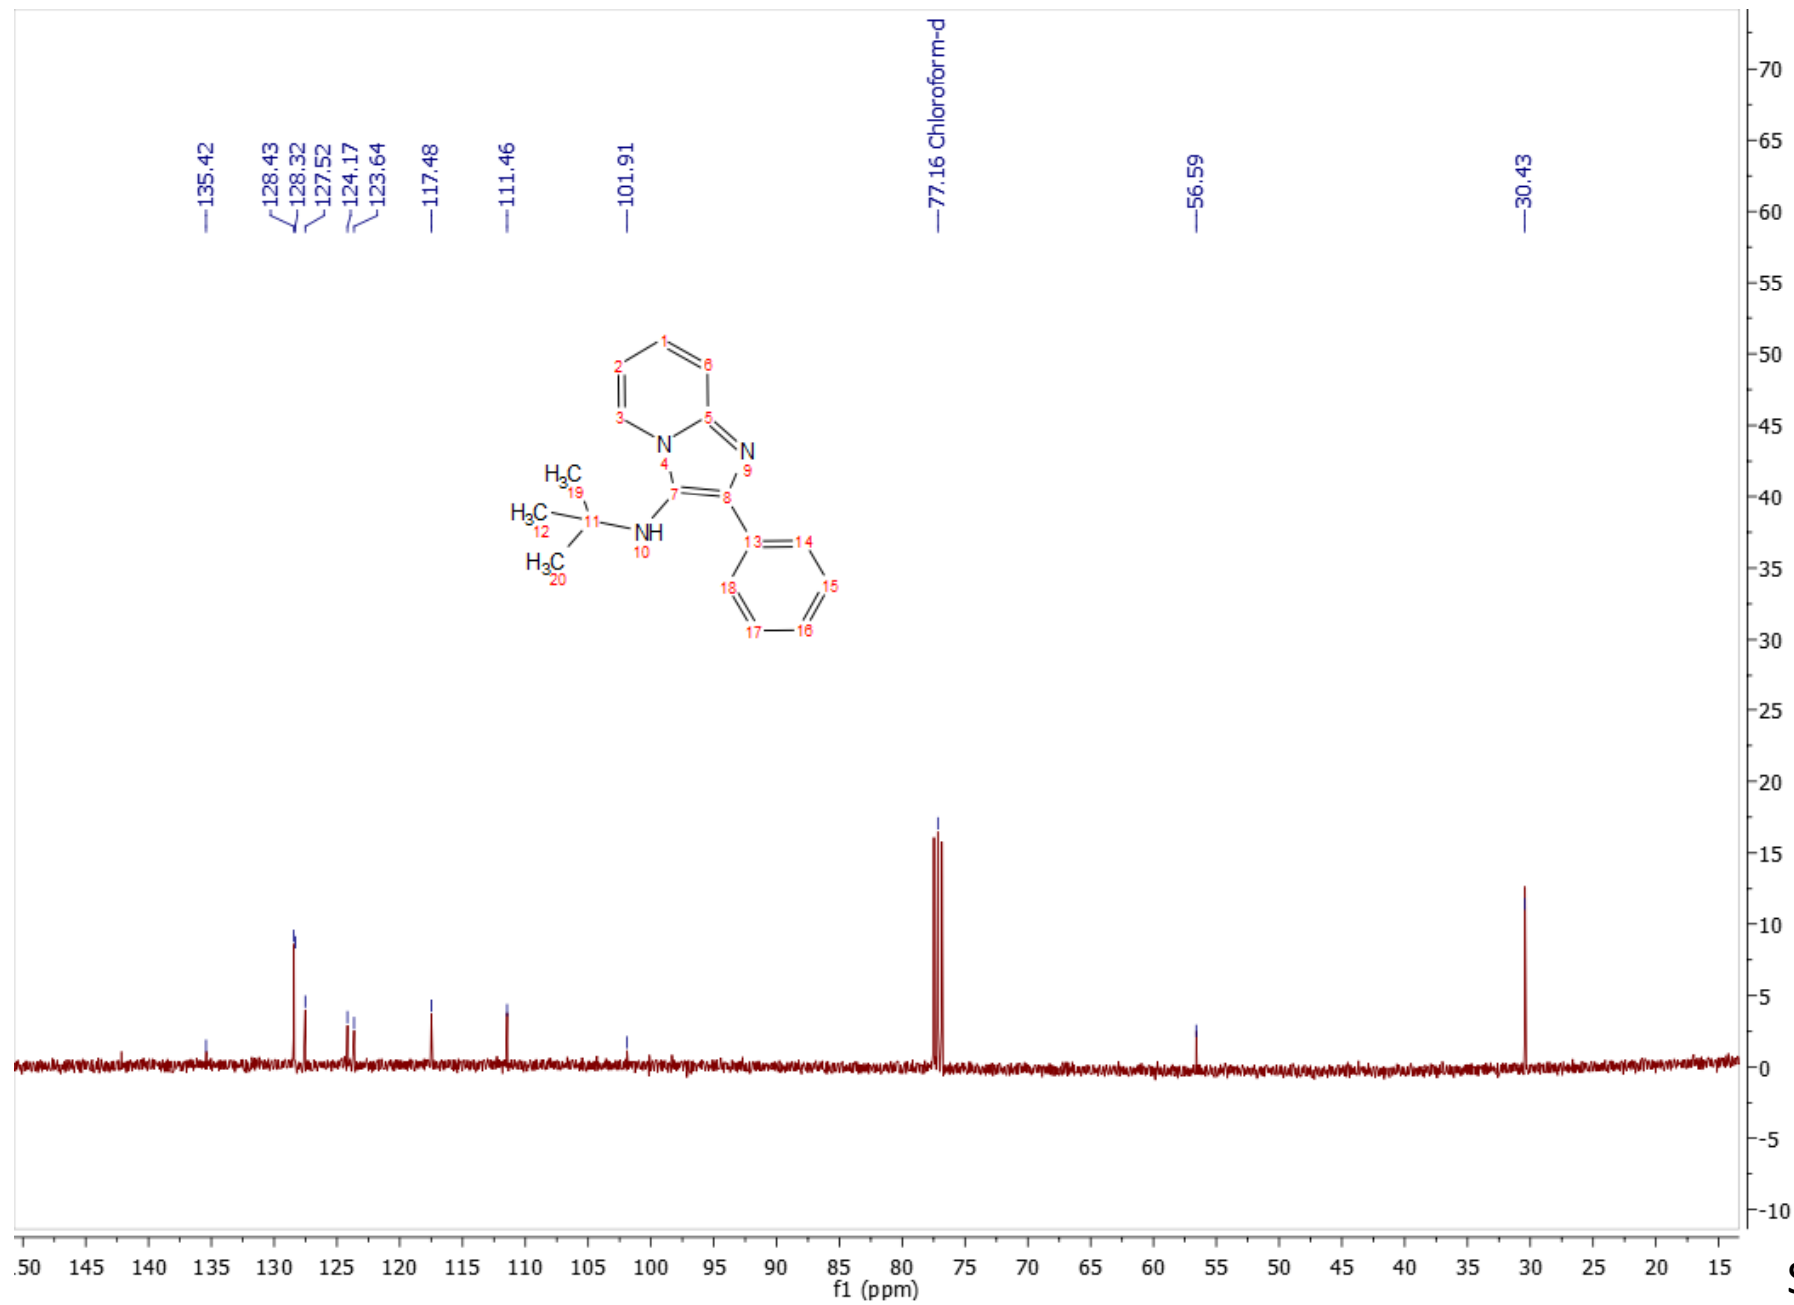

# 1a LC-MS

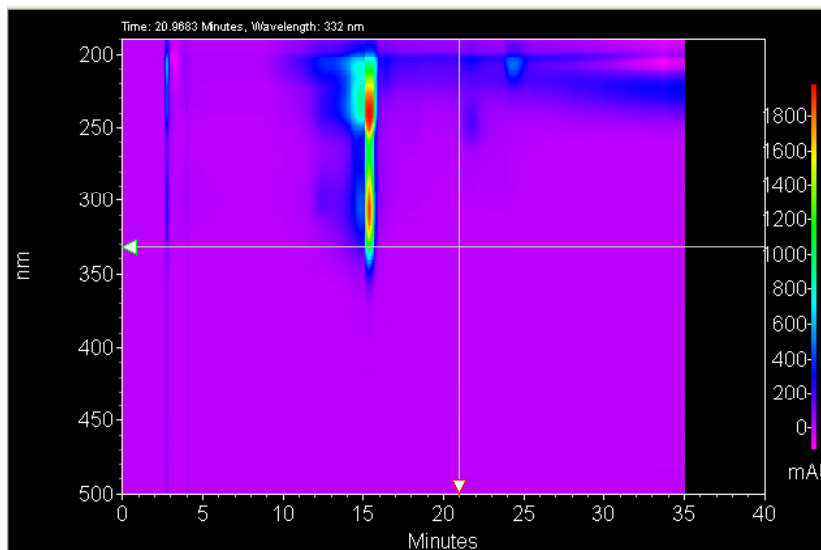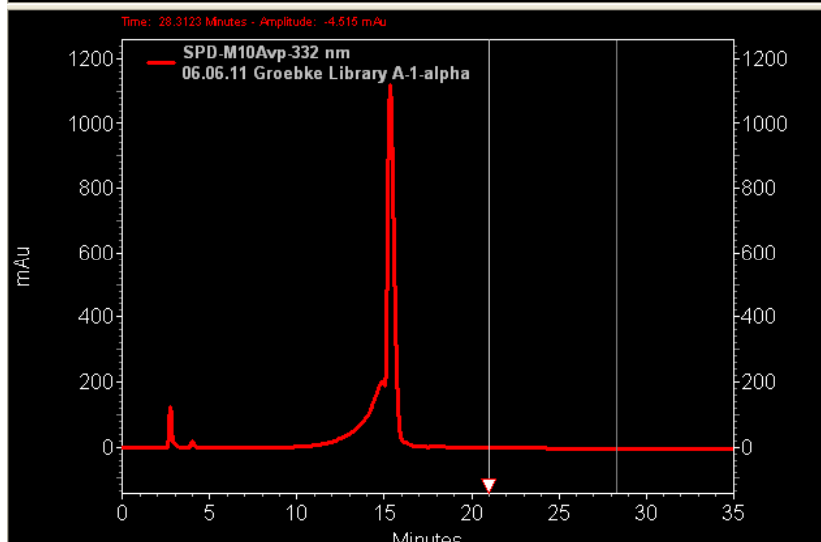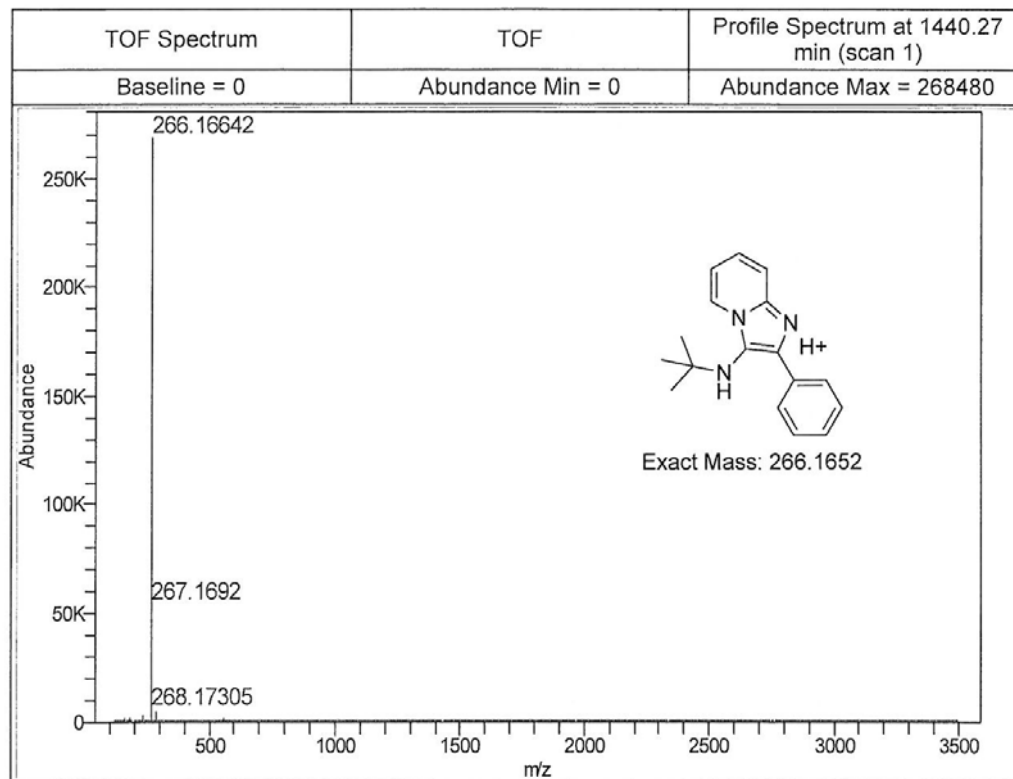

# 1b <sup>1</sup>H Spectrum

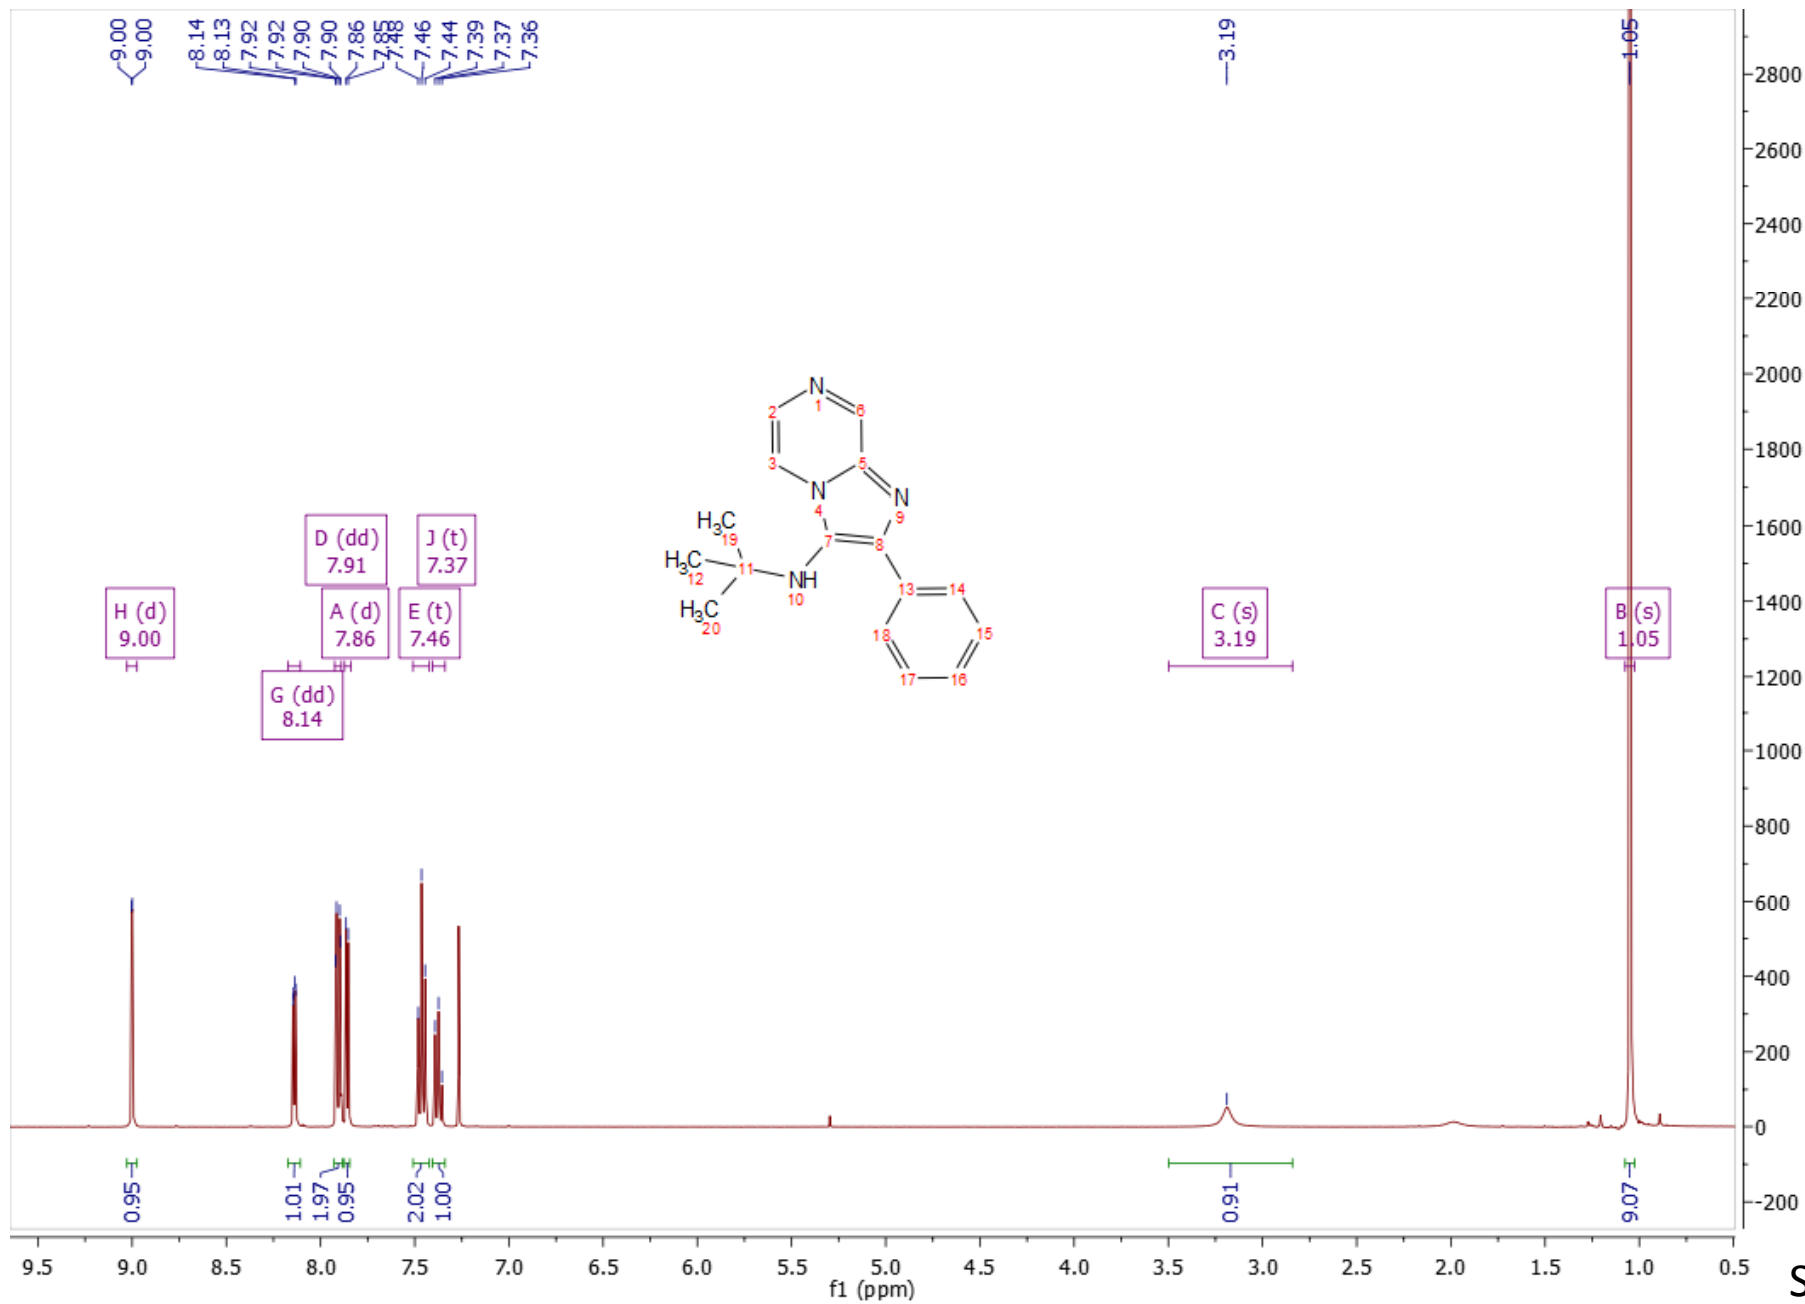

# 1b <sup>13</sup>C Spectrum

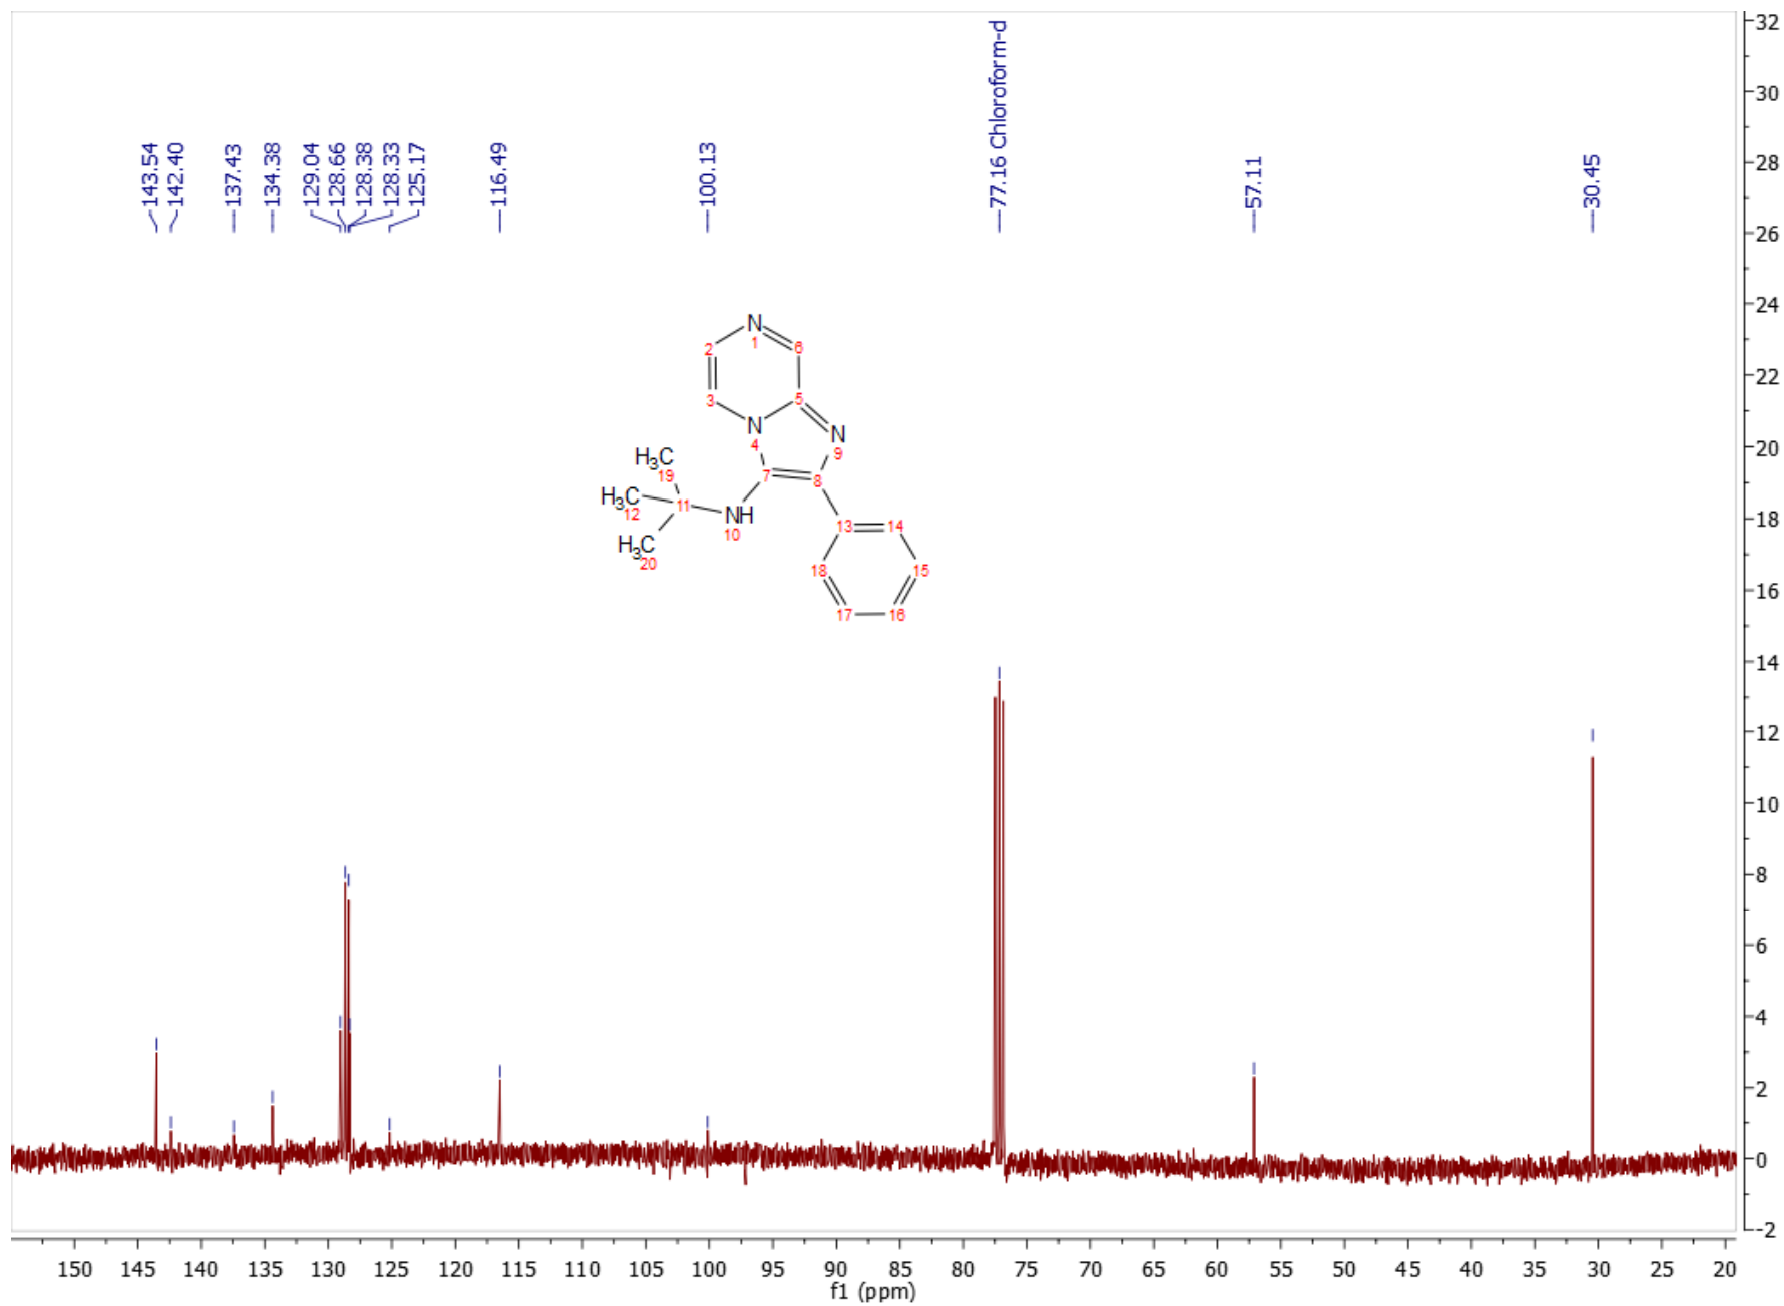

# 1b LC-MS

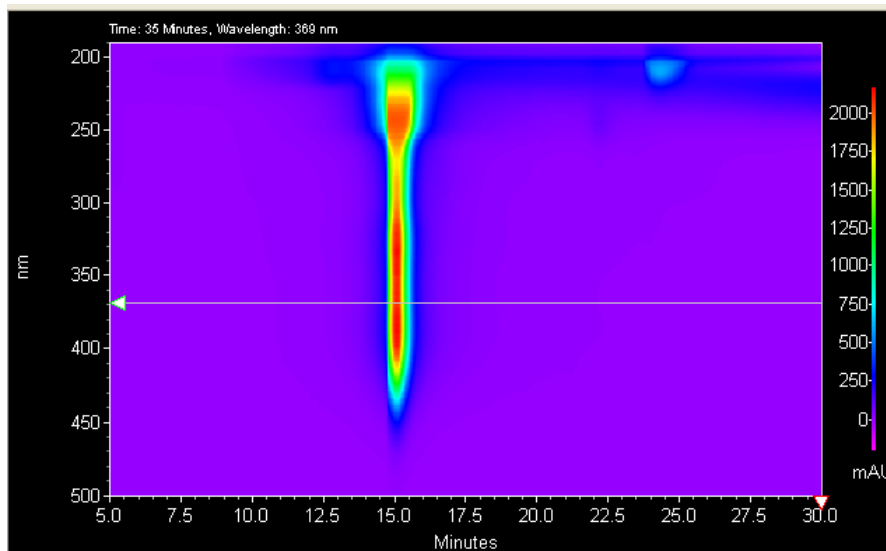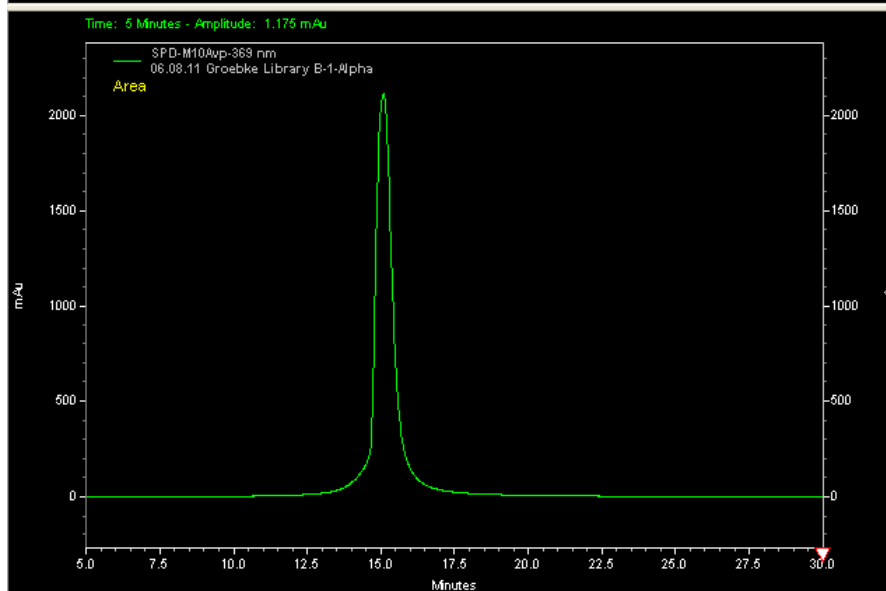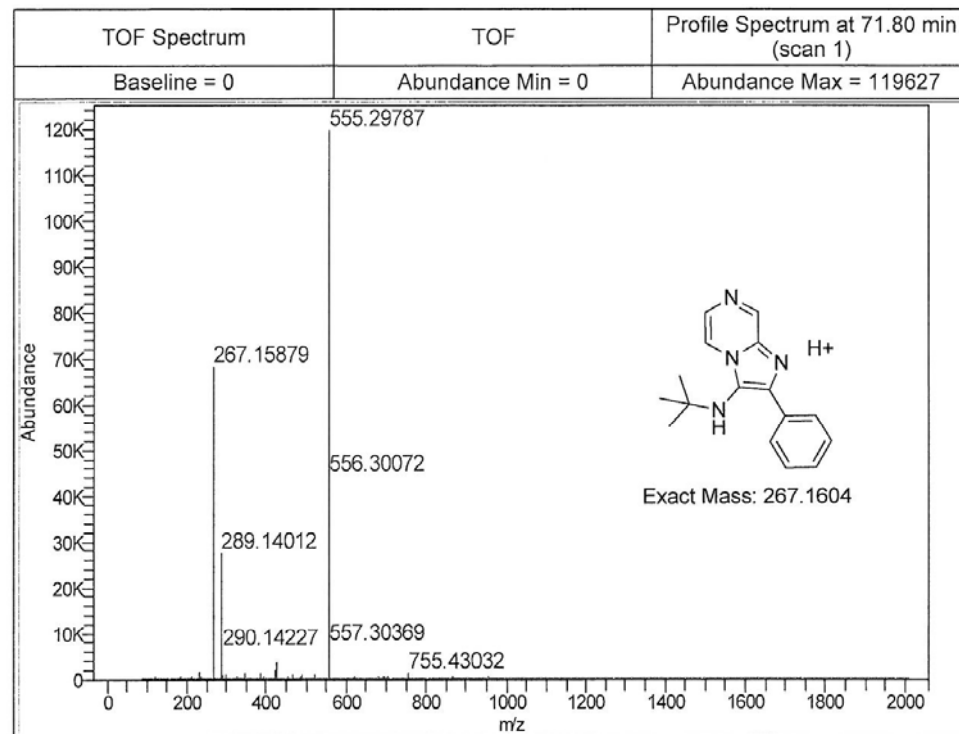

# 1c <sup>1</sup>H Spectrum

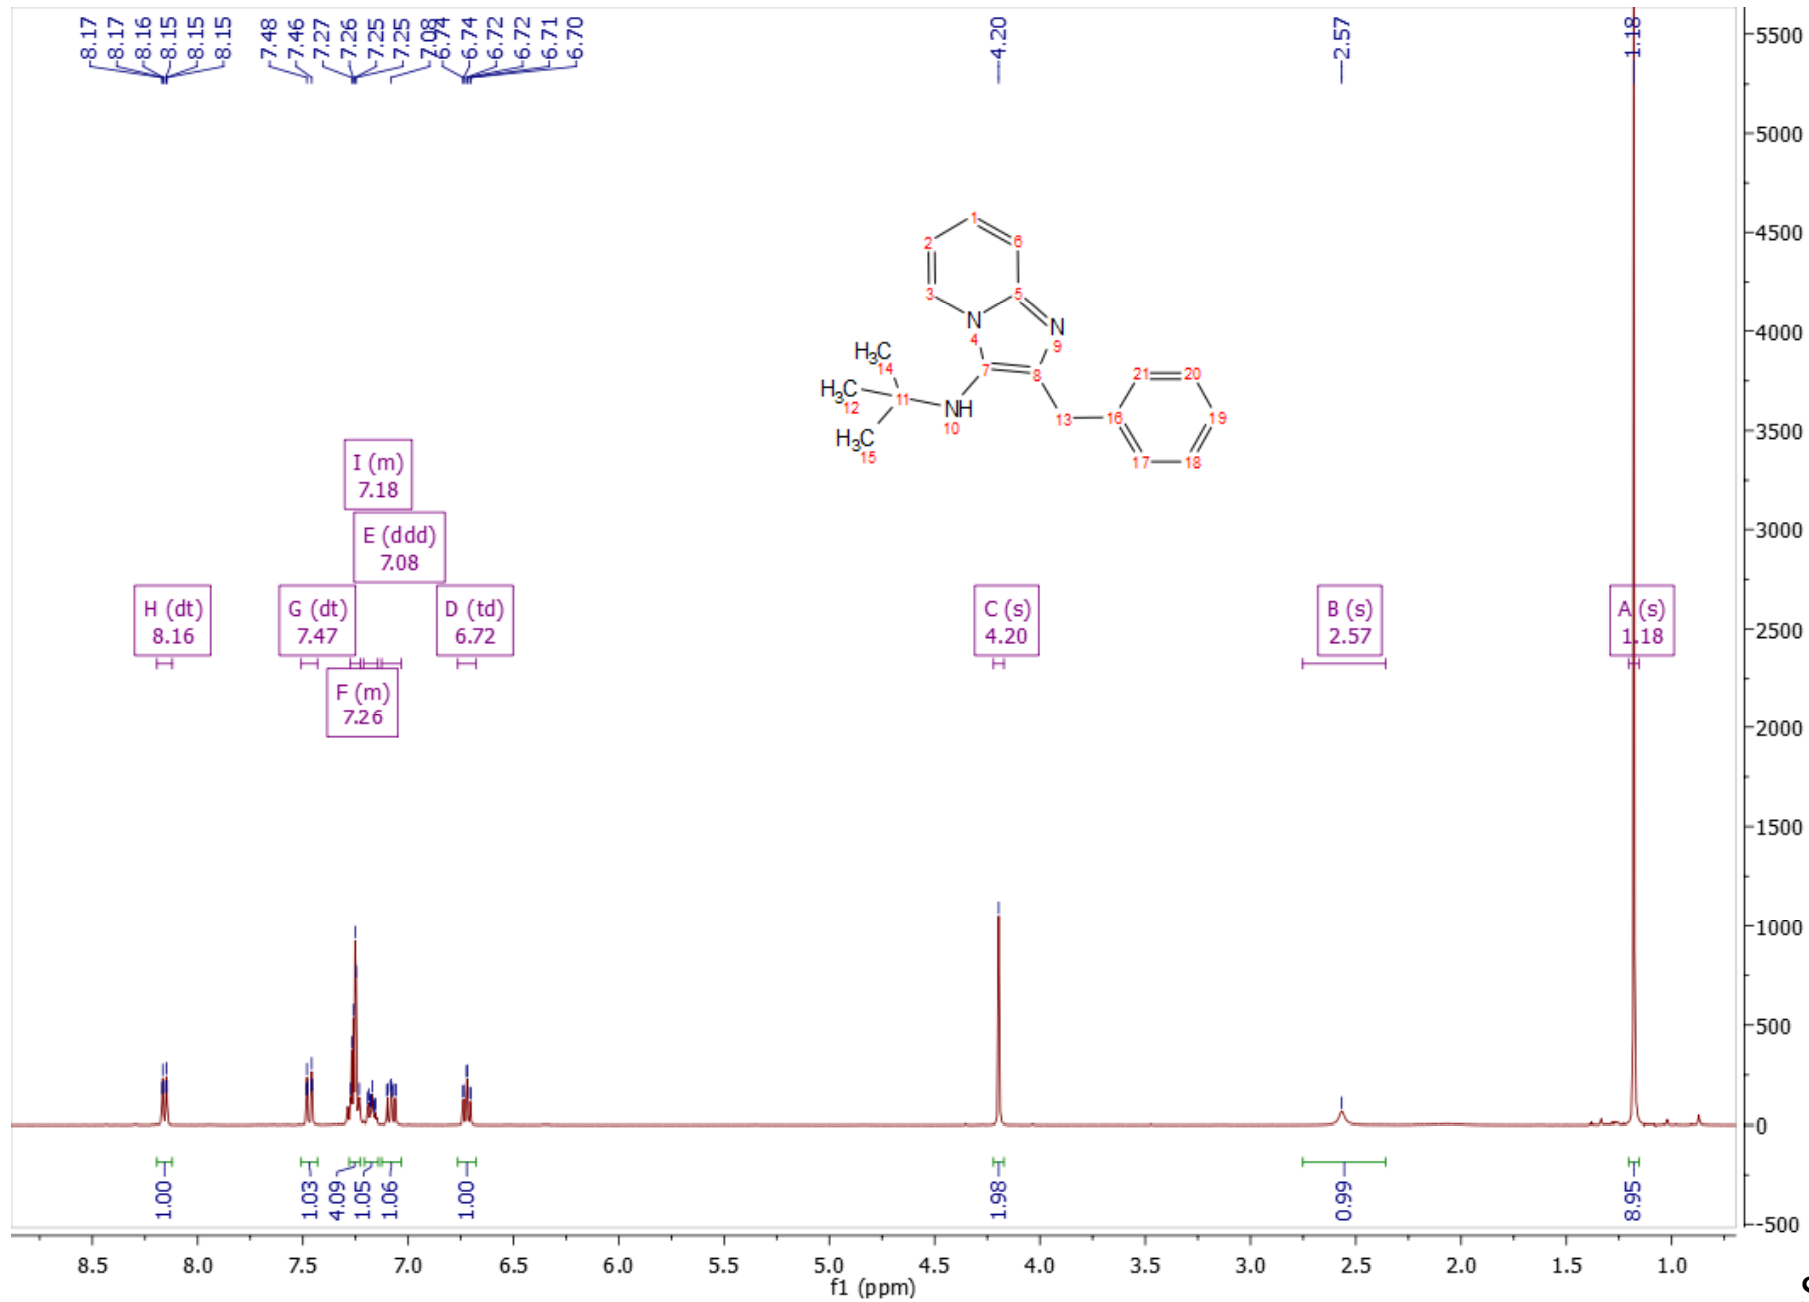



# 1c <sup>13</sup>C Spectrum

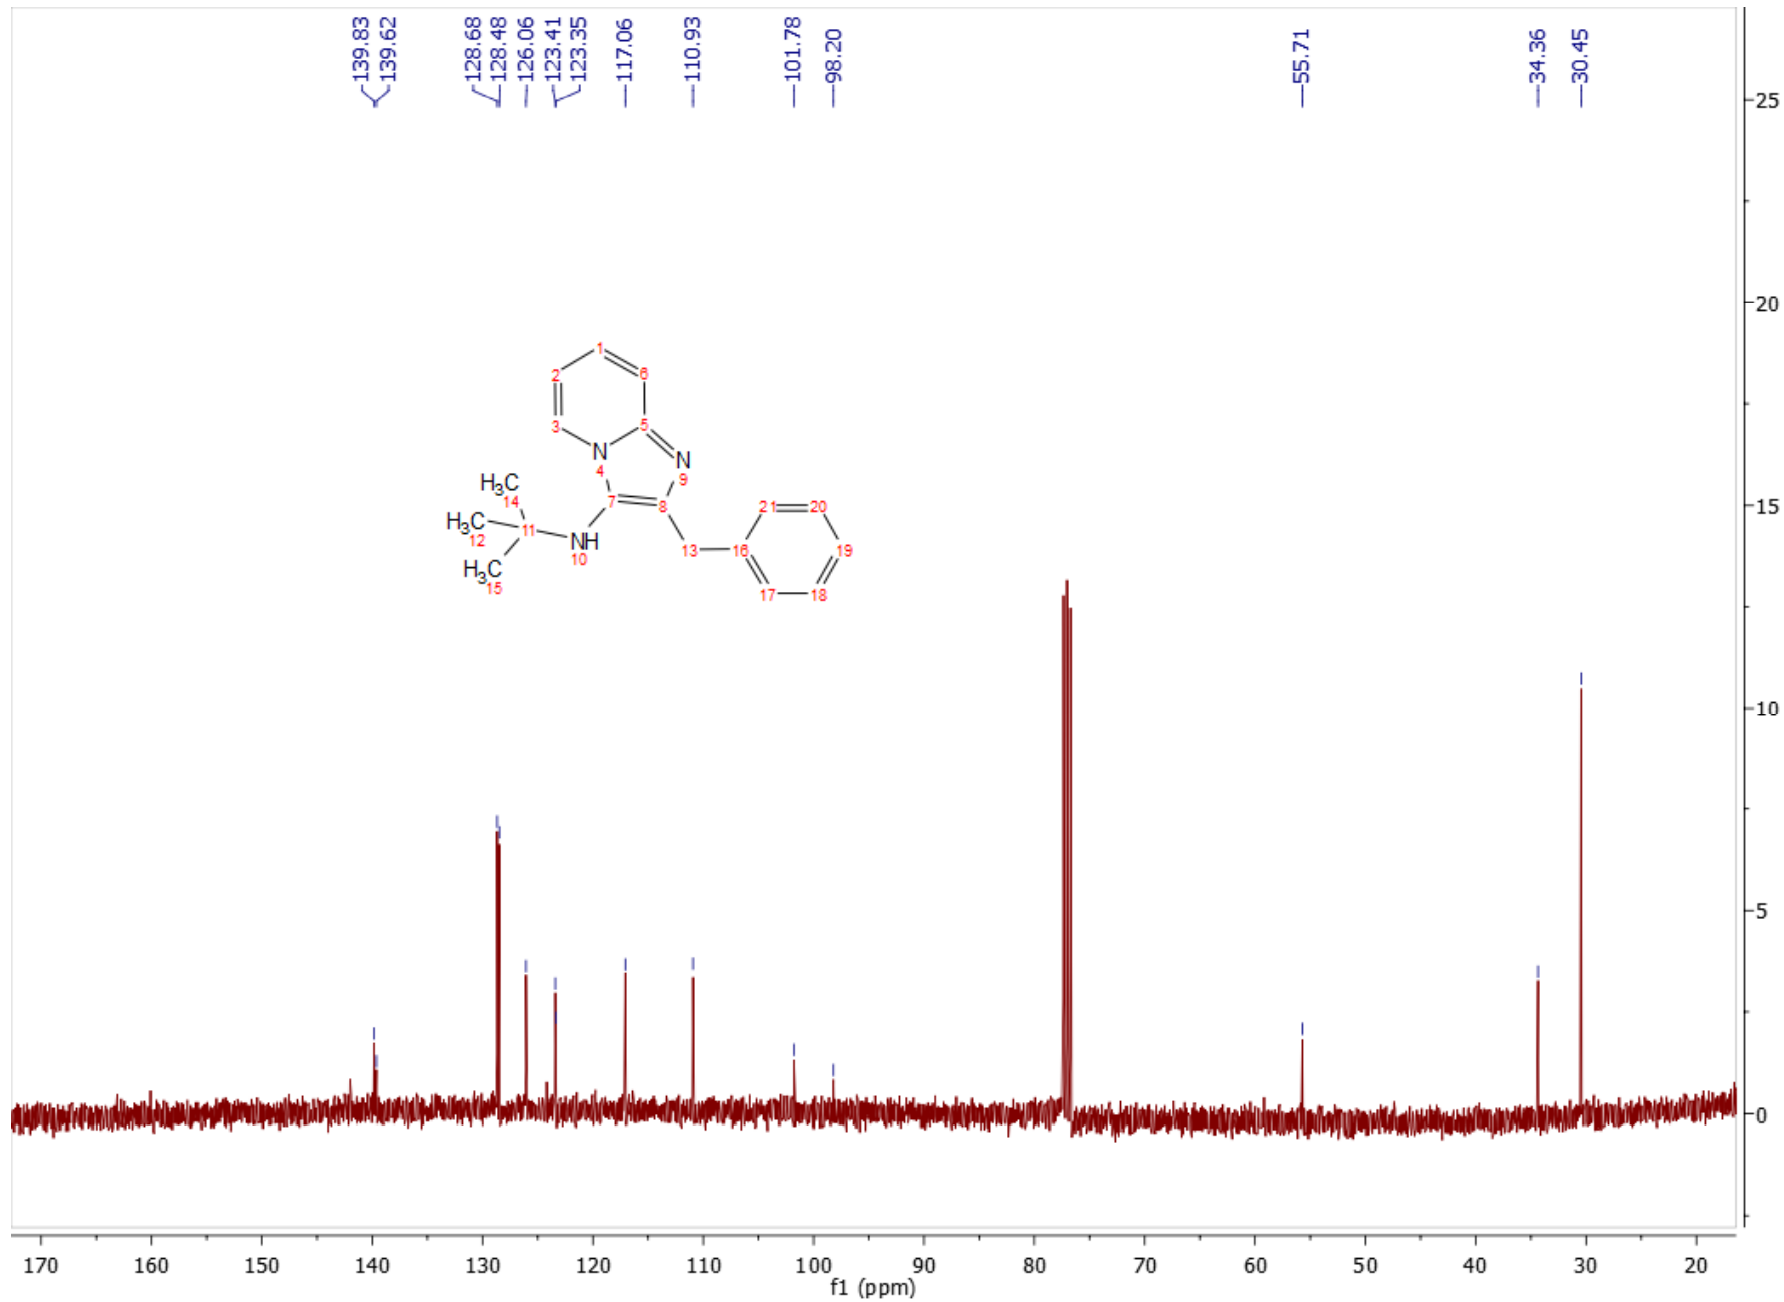

# 1c LC-MS

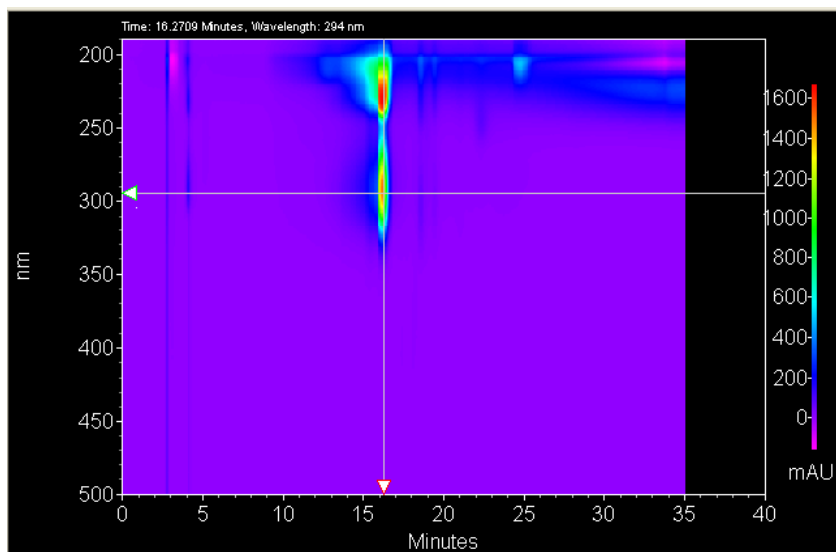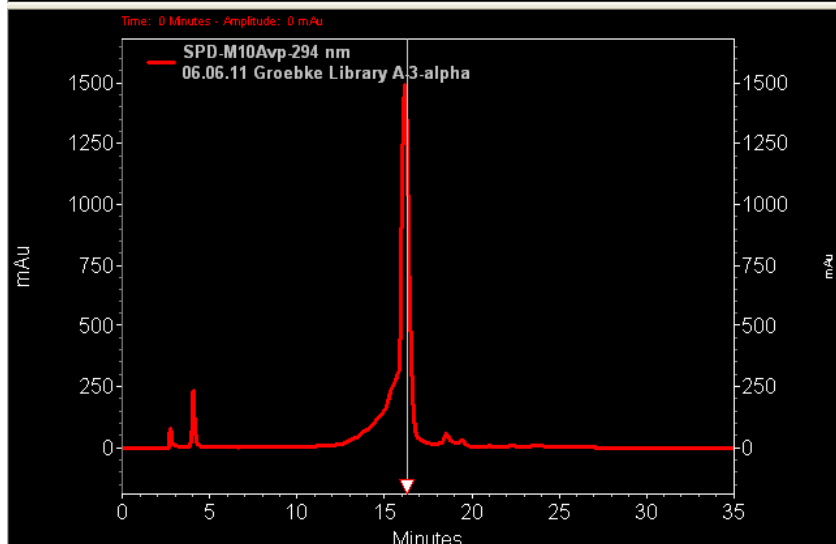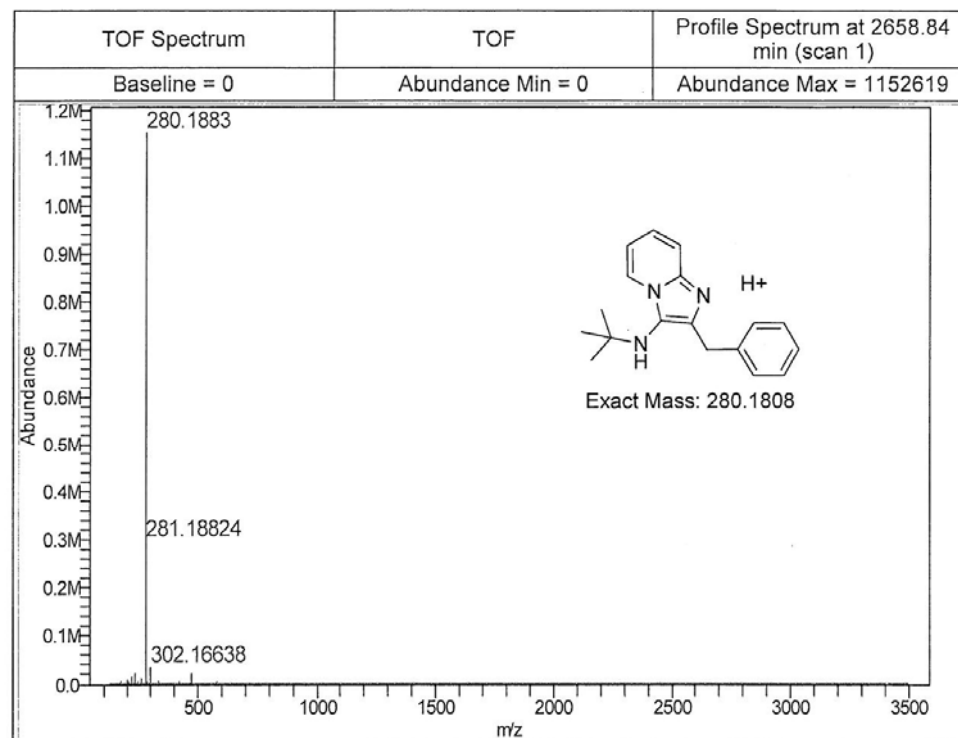

# 1d <sup>1</sup>H Spectrum

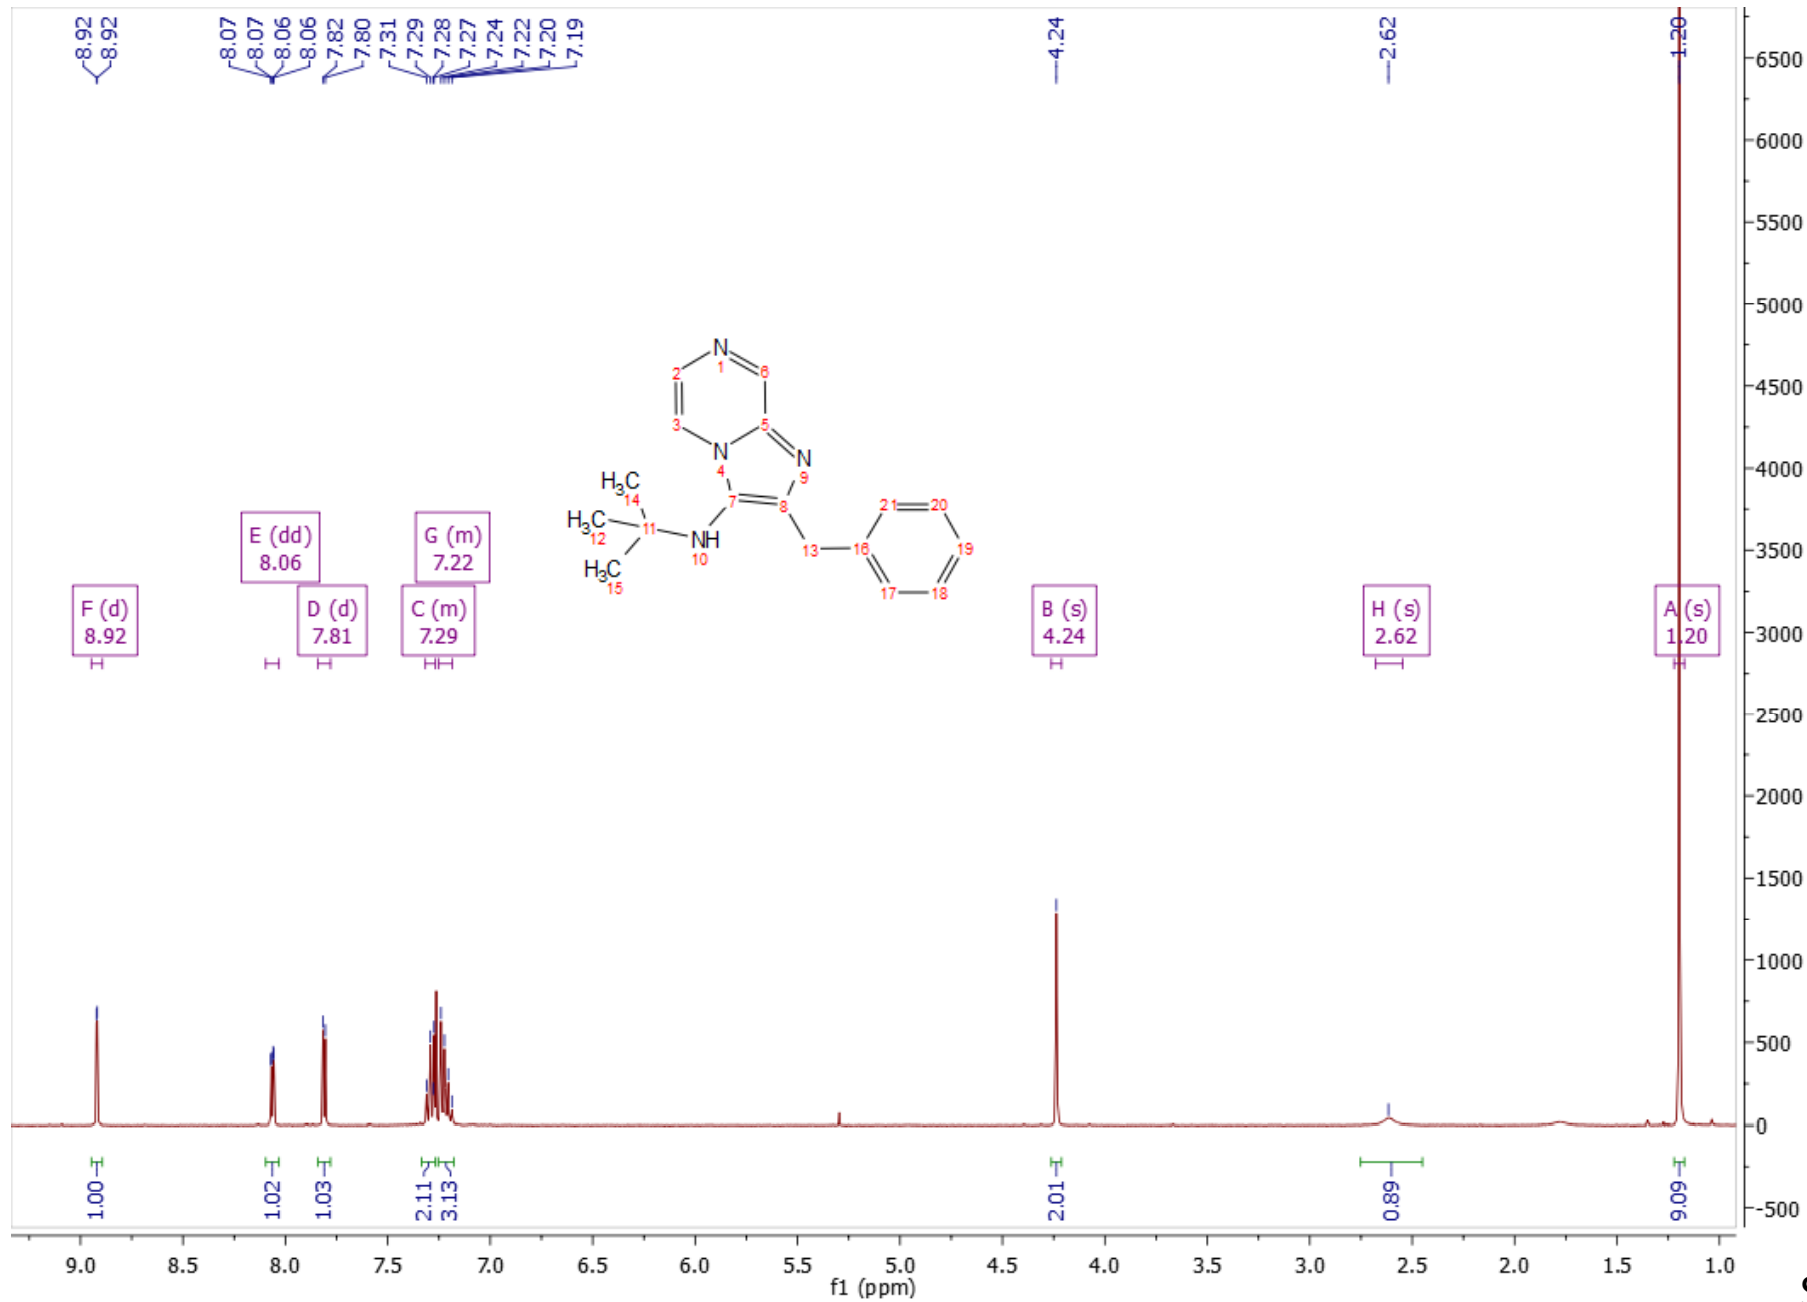

# 1d <sup>13</sup>C Spectrum

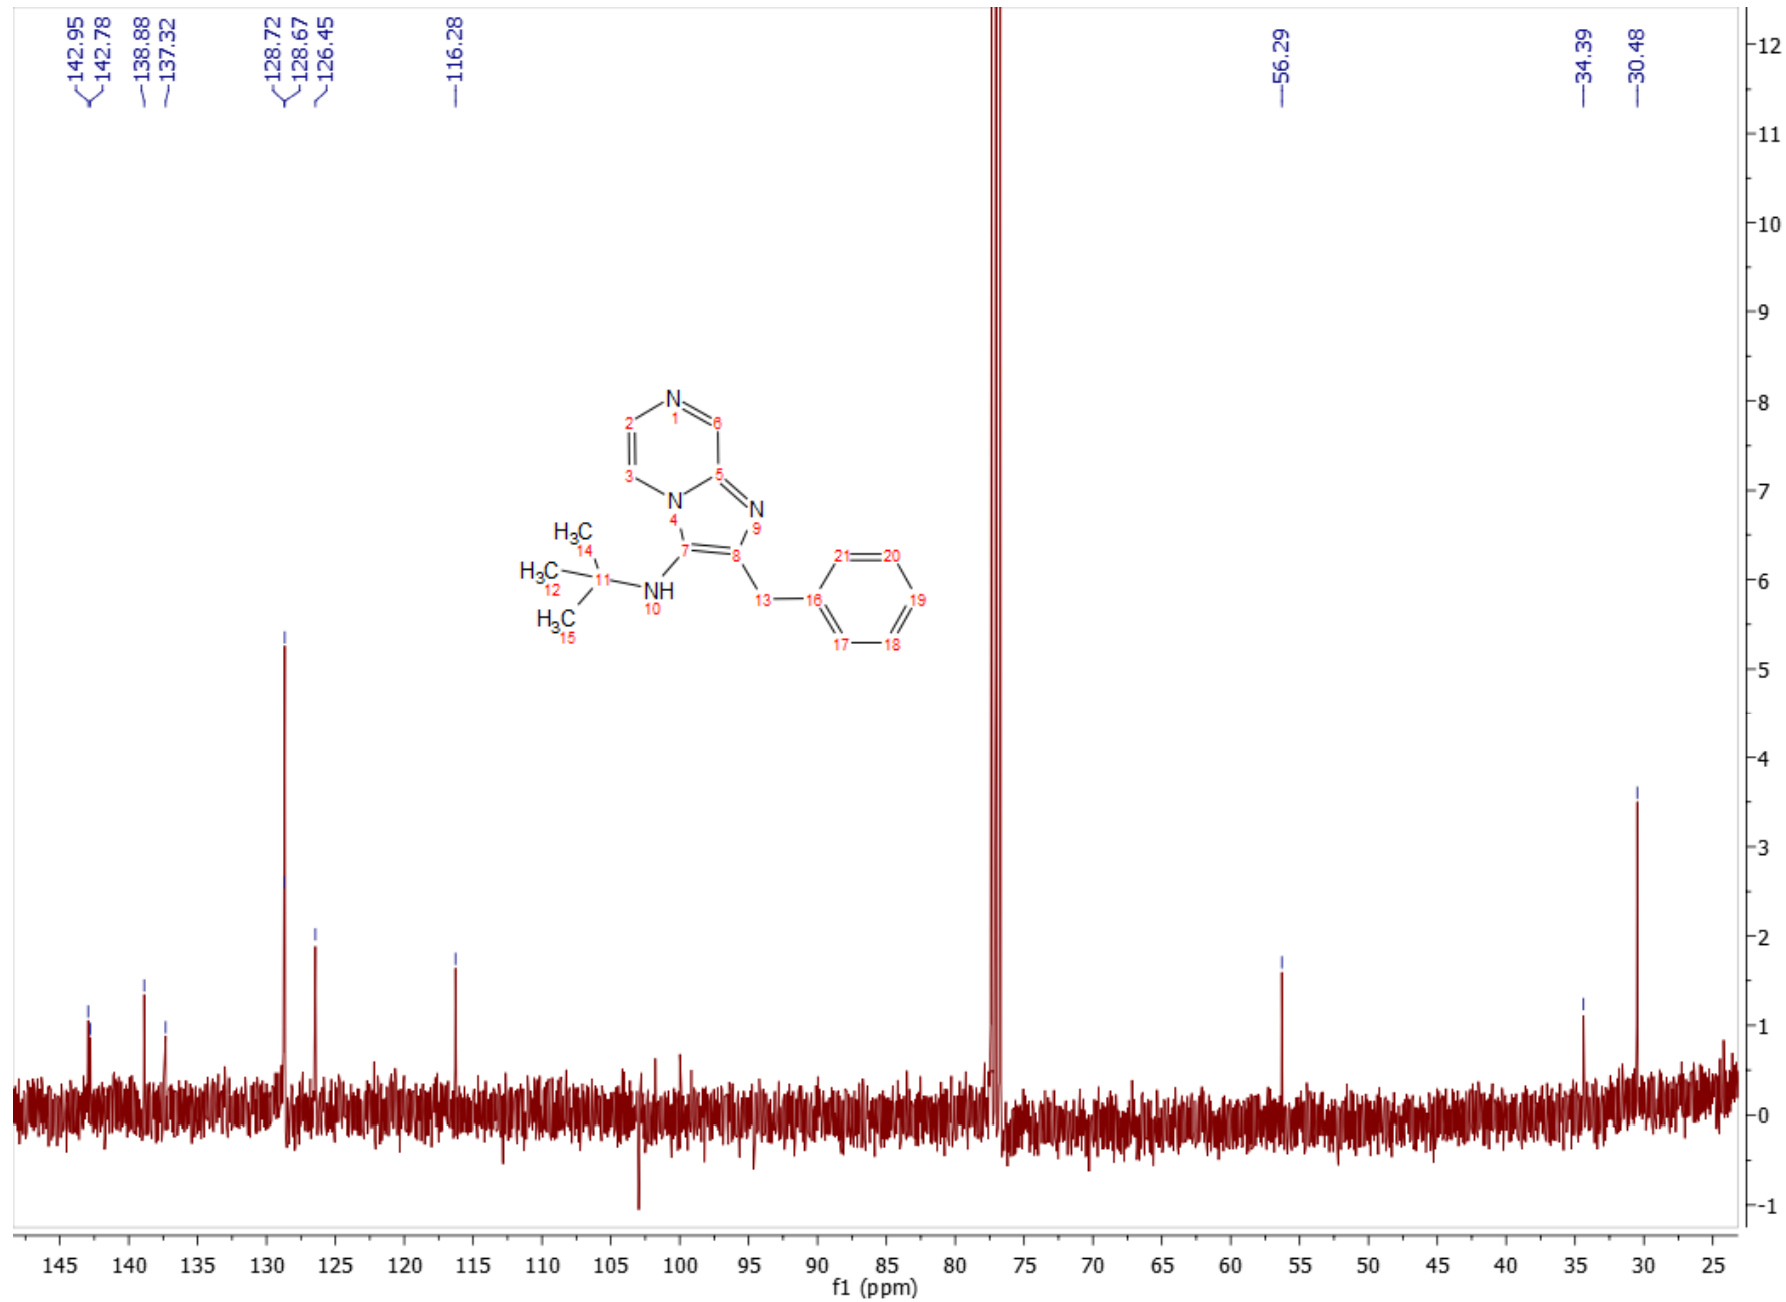

# 1d LC-MS

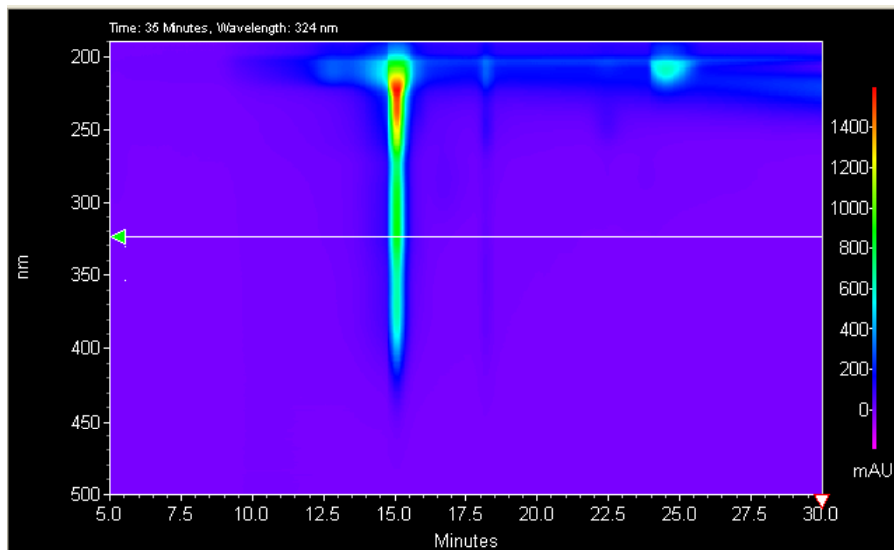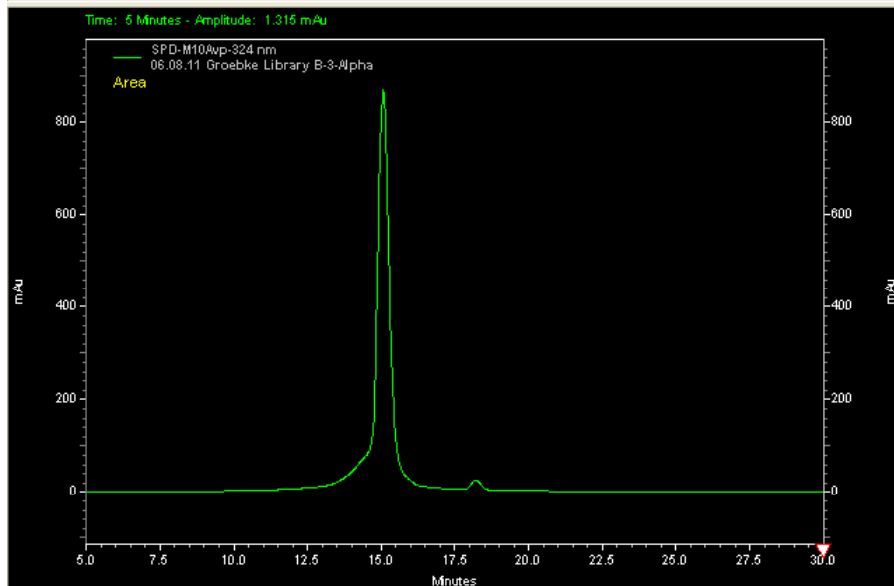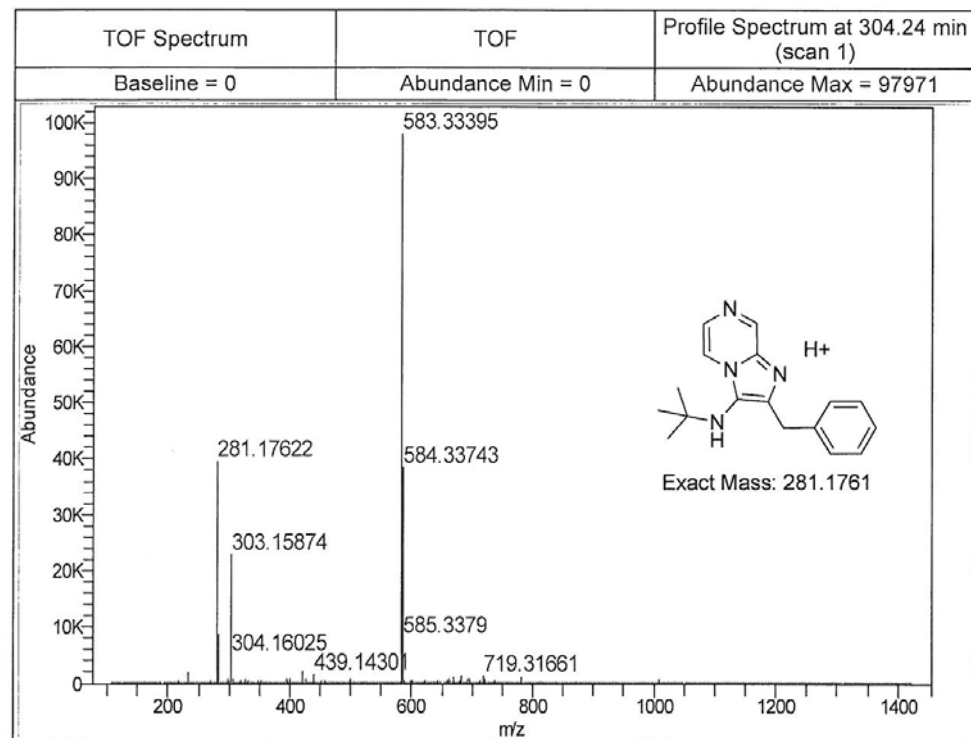

# 1e <sup>1</sup>H Spectrum

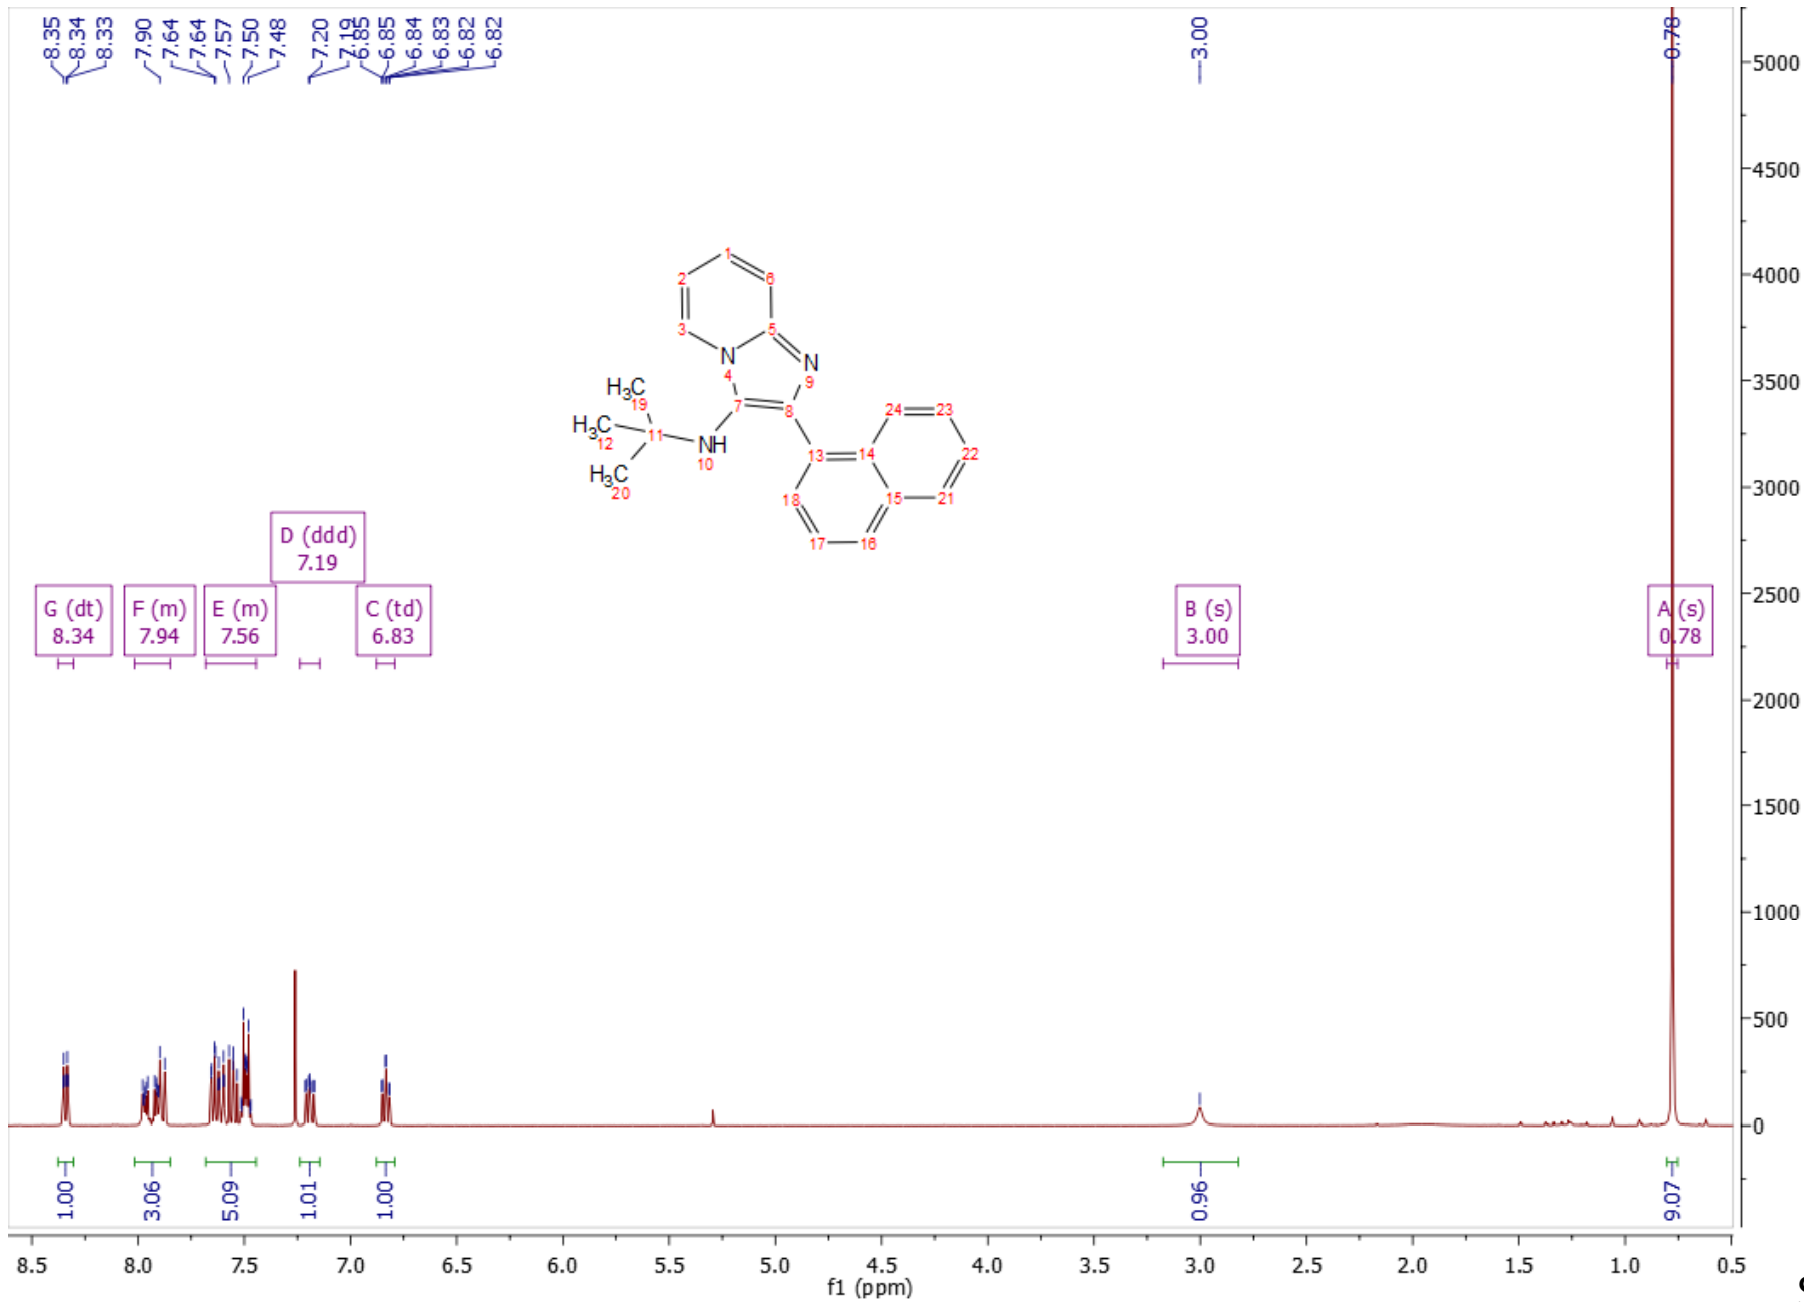

# 1e <sup>13</sup>C Spectrum

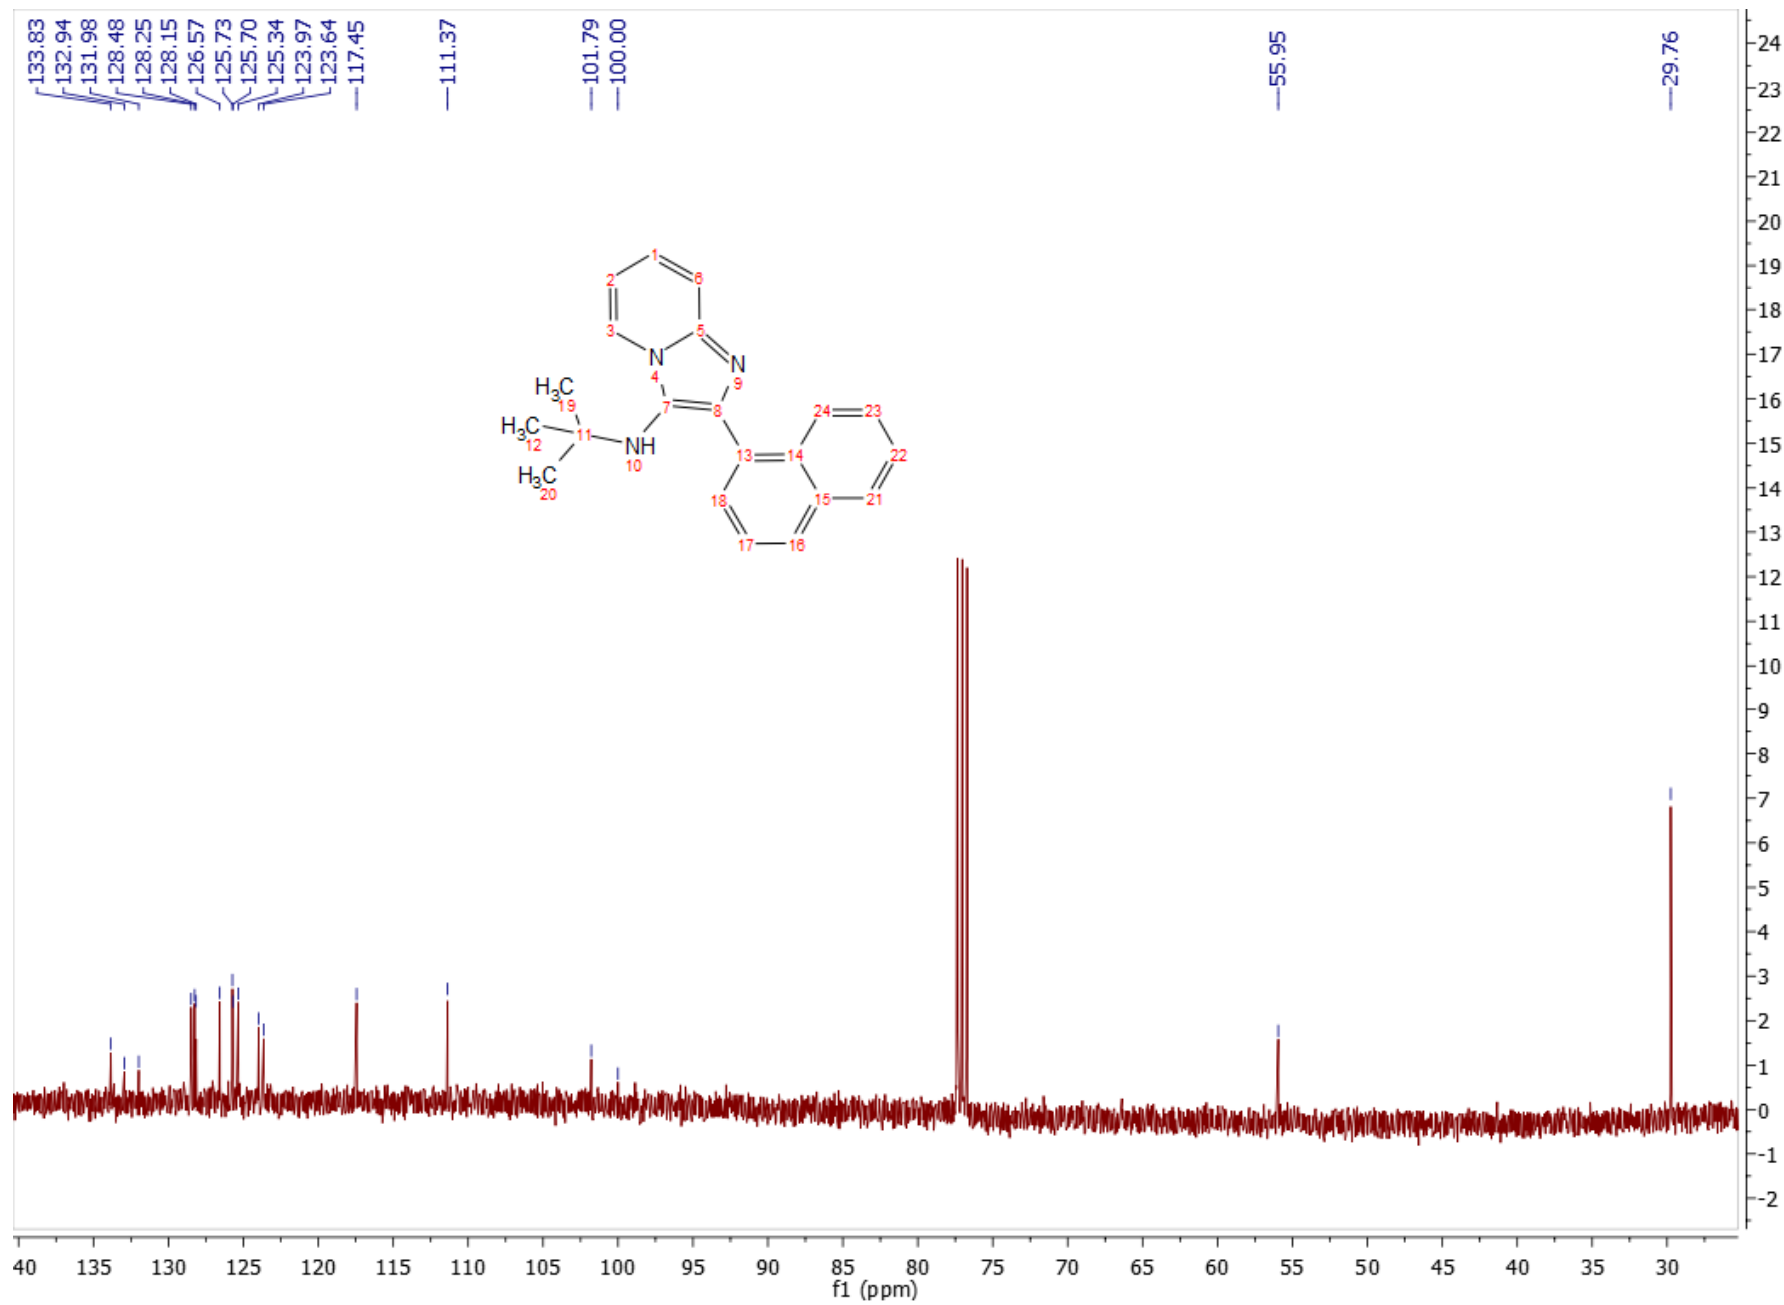

# 1e LC-MS

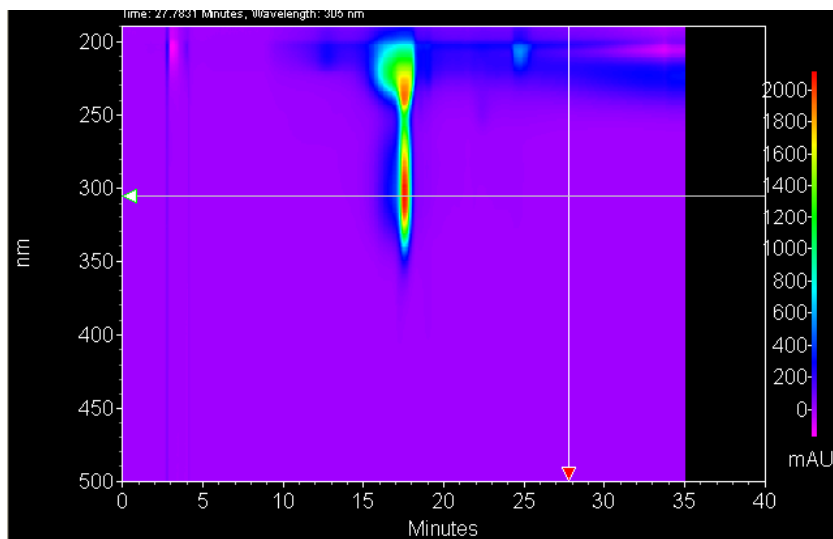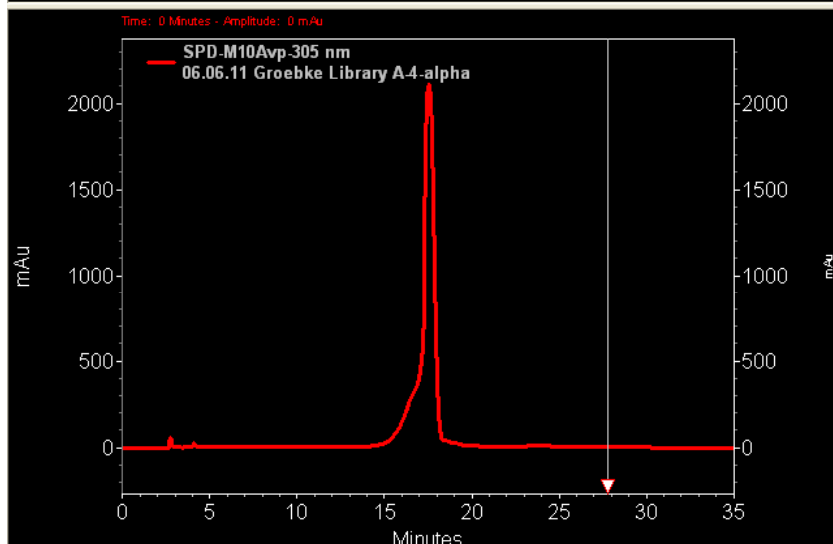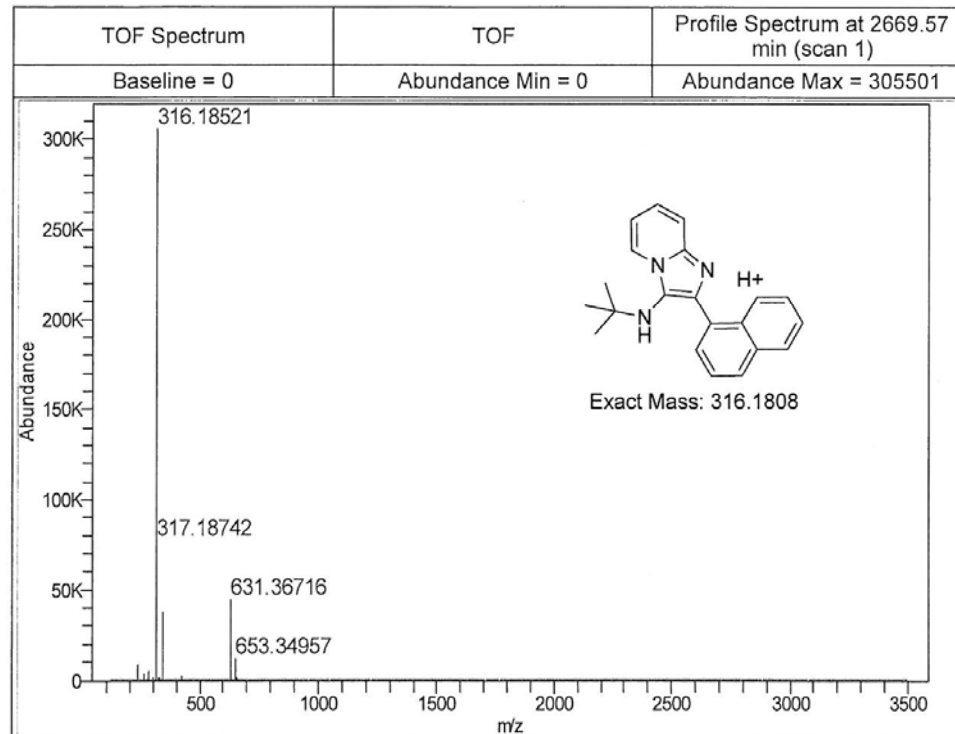



# 1f <sup>1</sup>H Spectrum

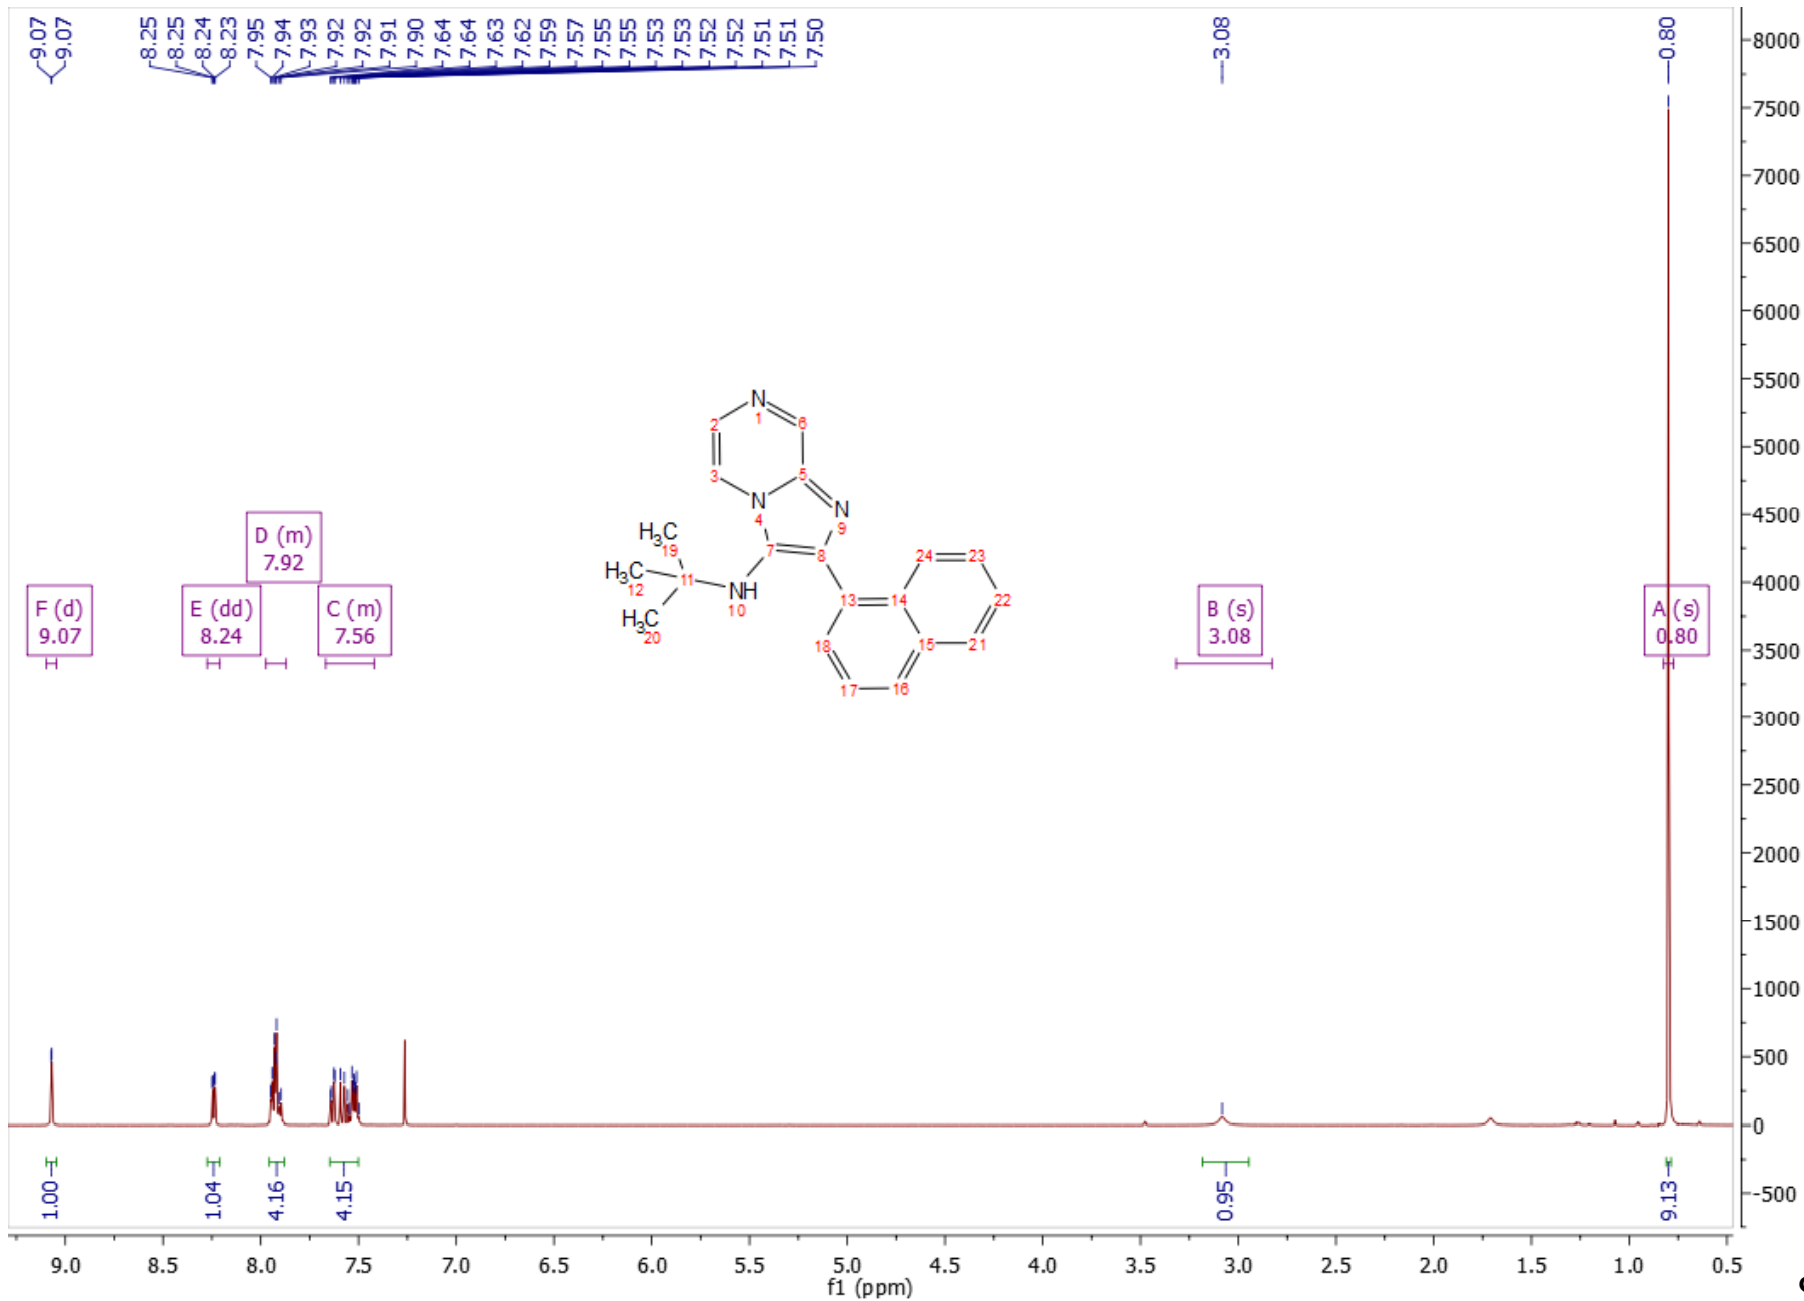

# 1f <sup>13</sup>C Spectrum

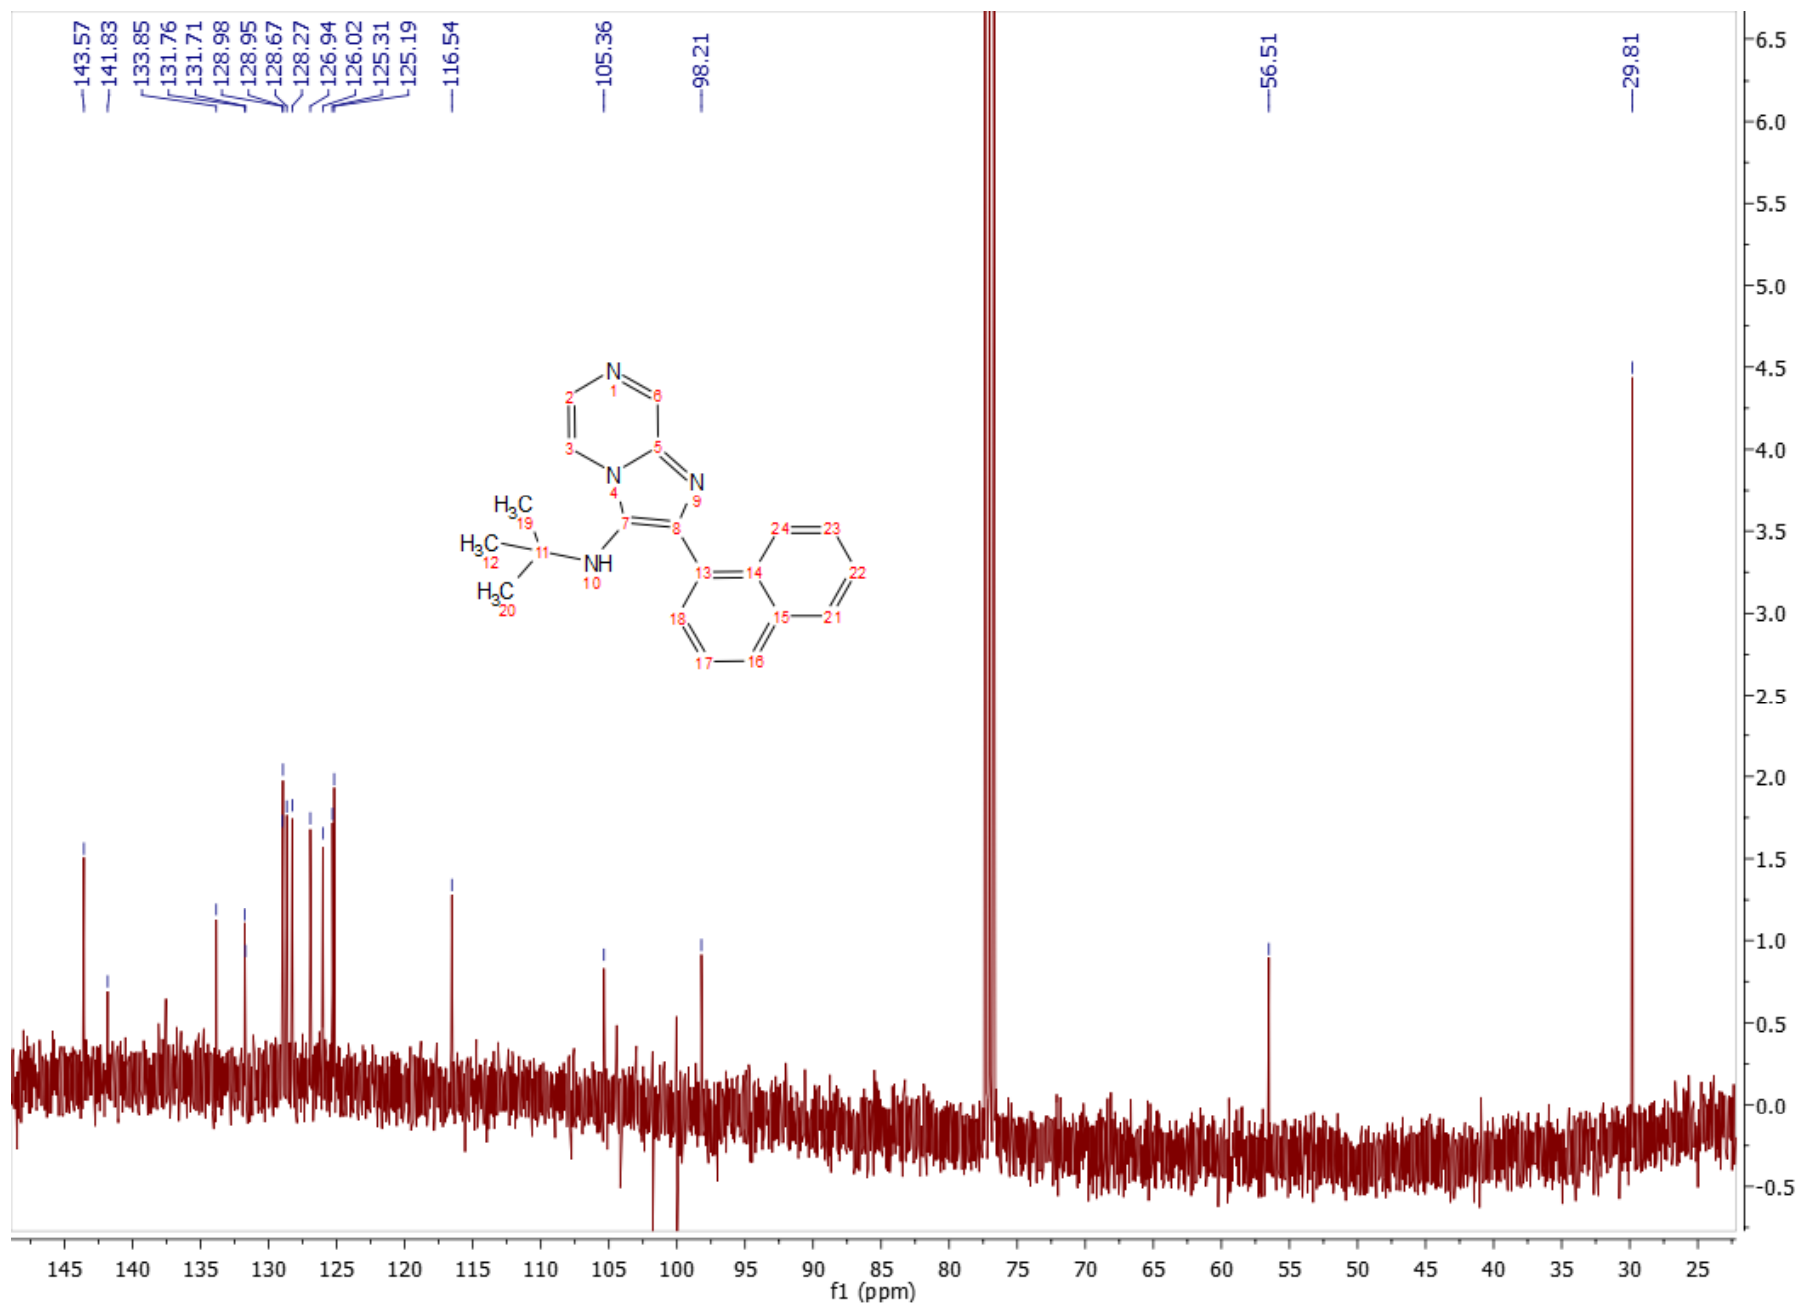

# 1f LC-MS

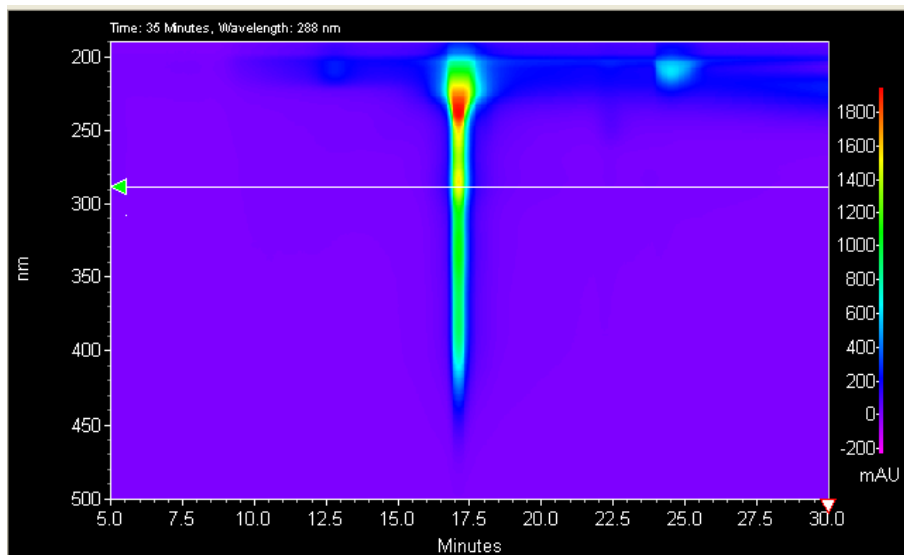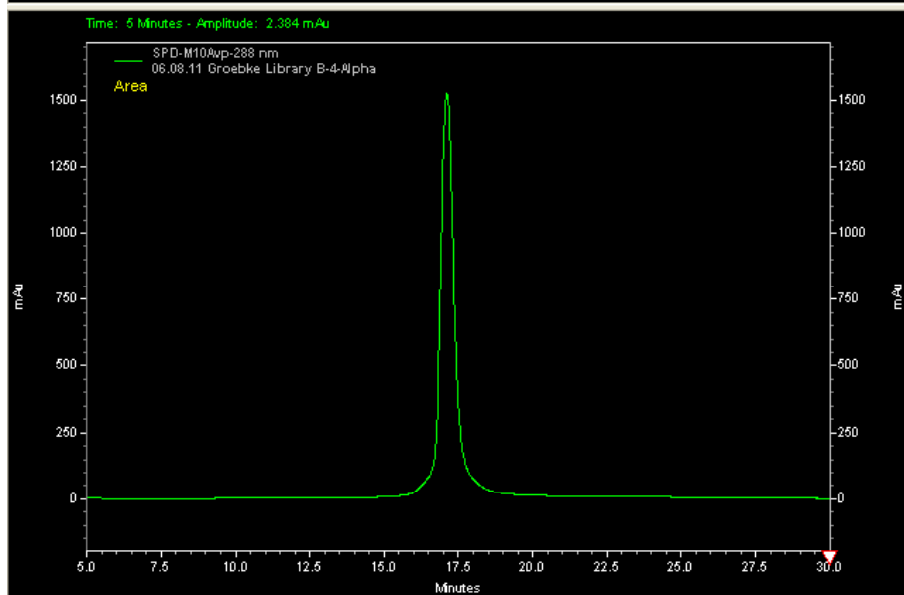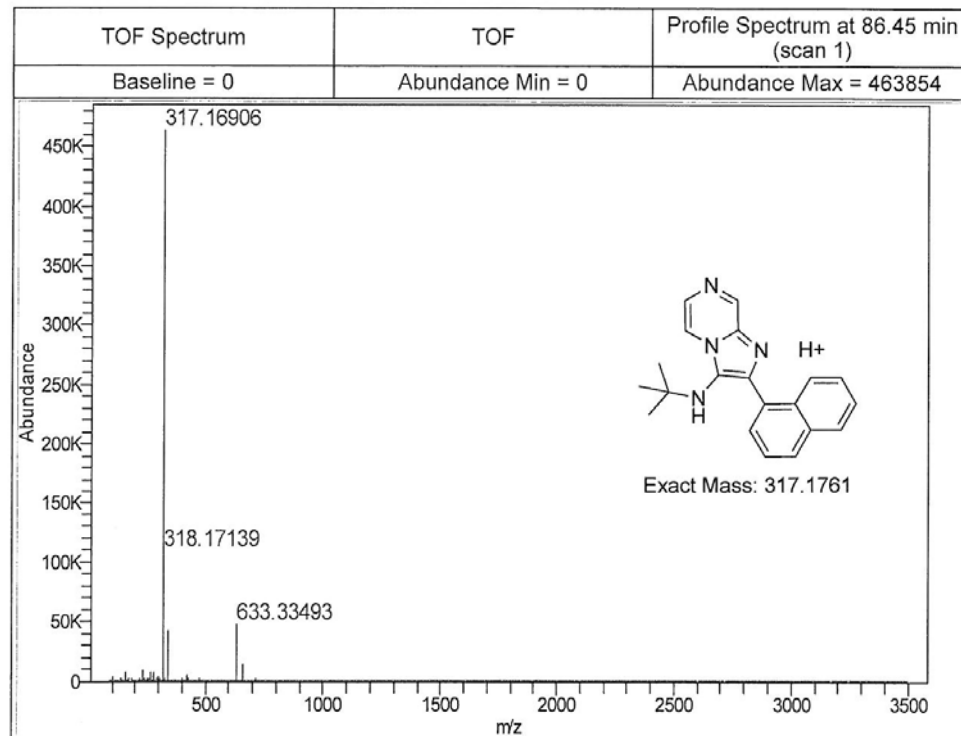

# 1g <sup>1</sup>H Spectrum

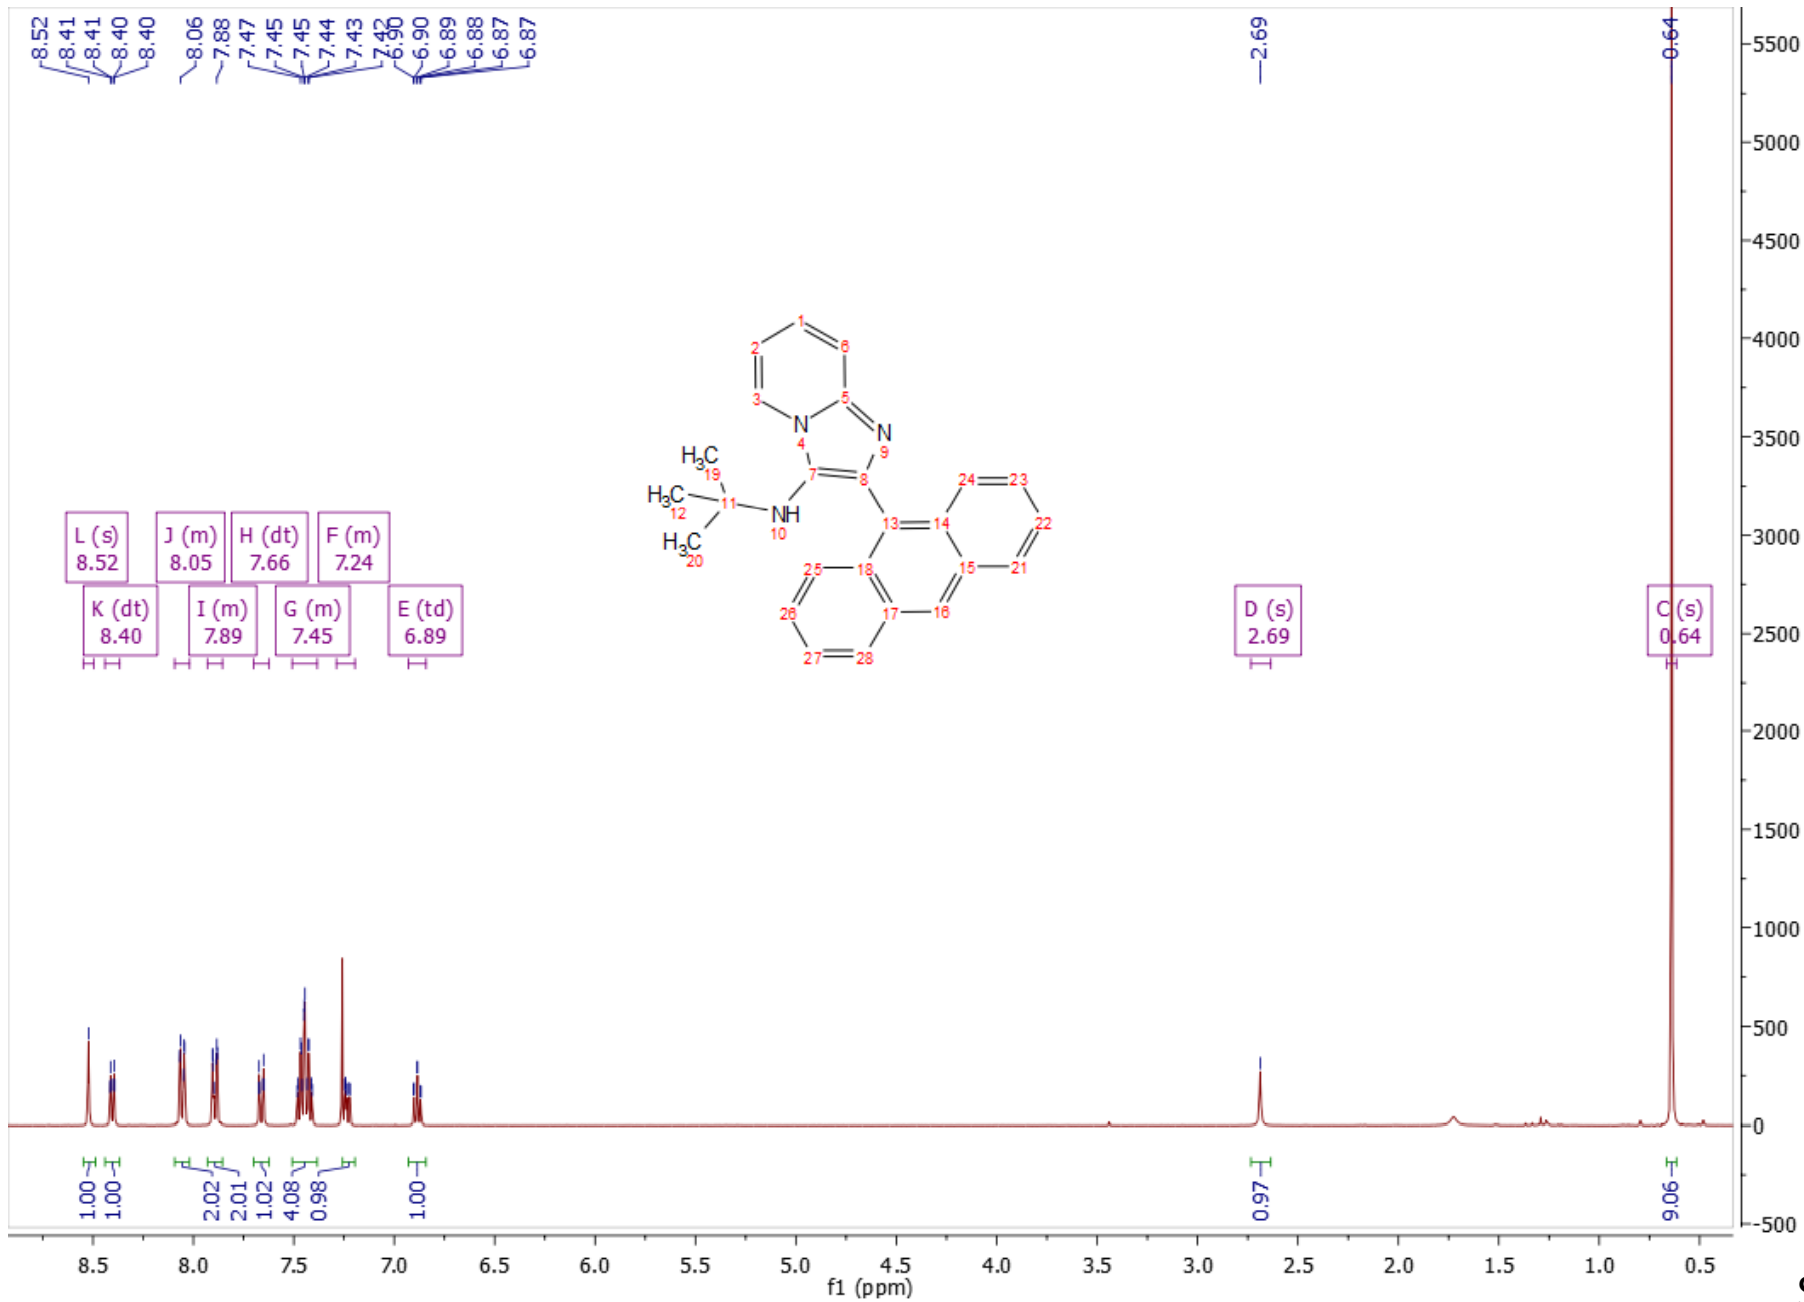

# 1g <sup>13</sup>C Spectrum

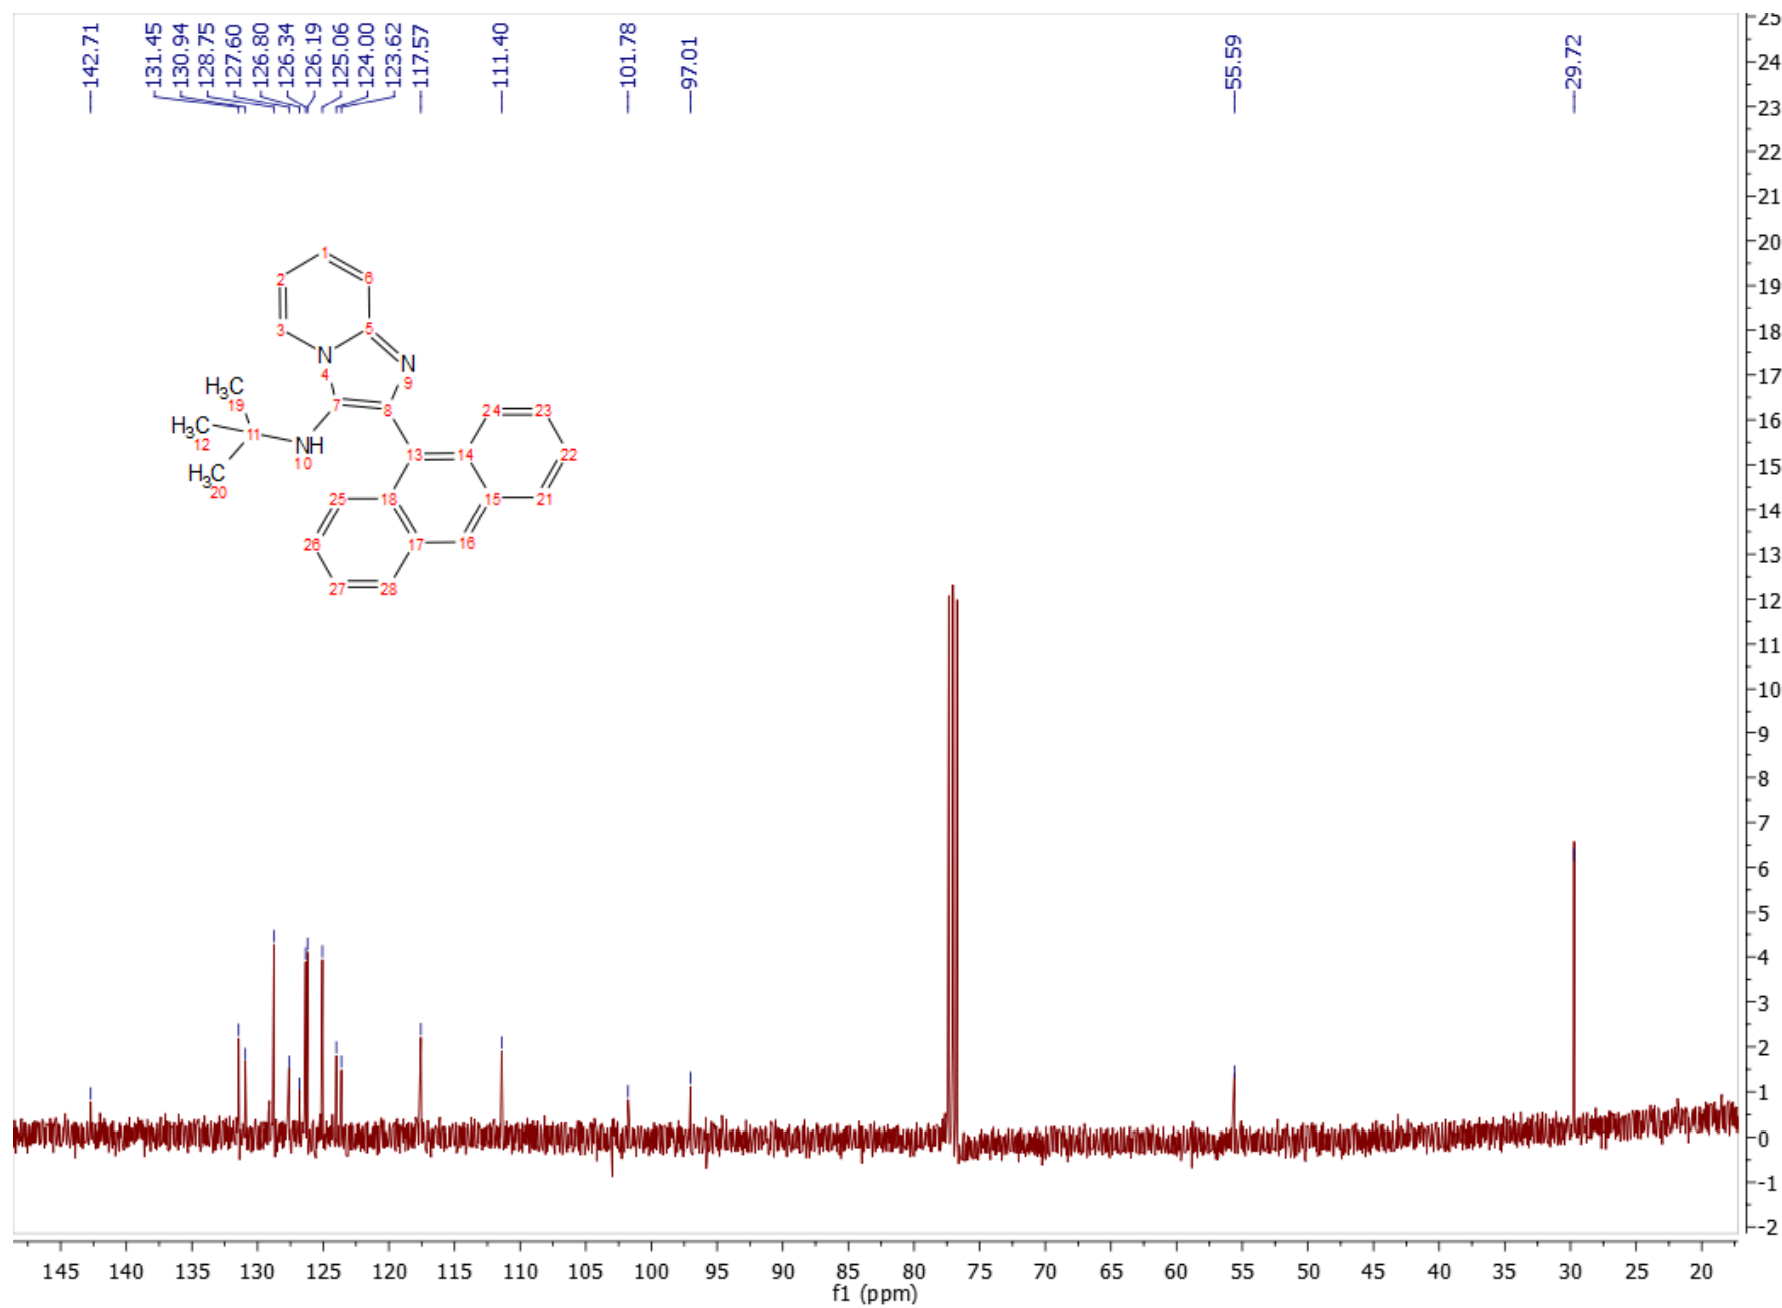

# 1g LC-MS

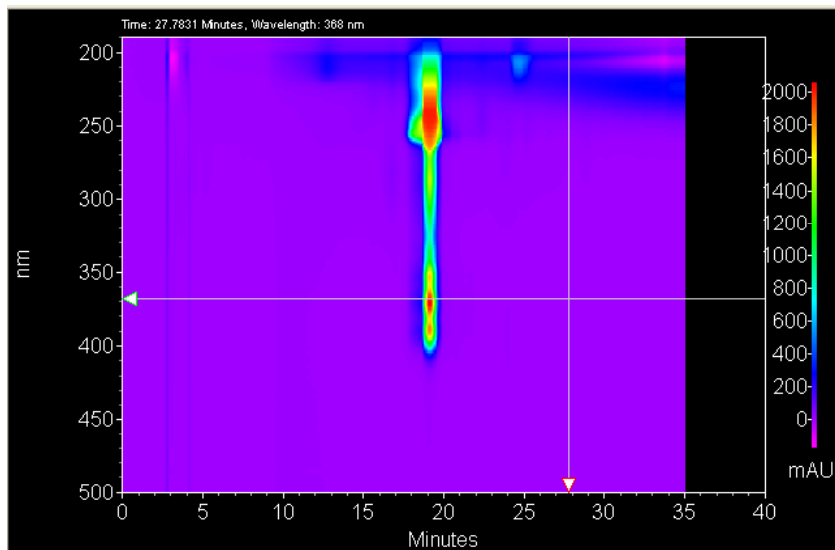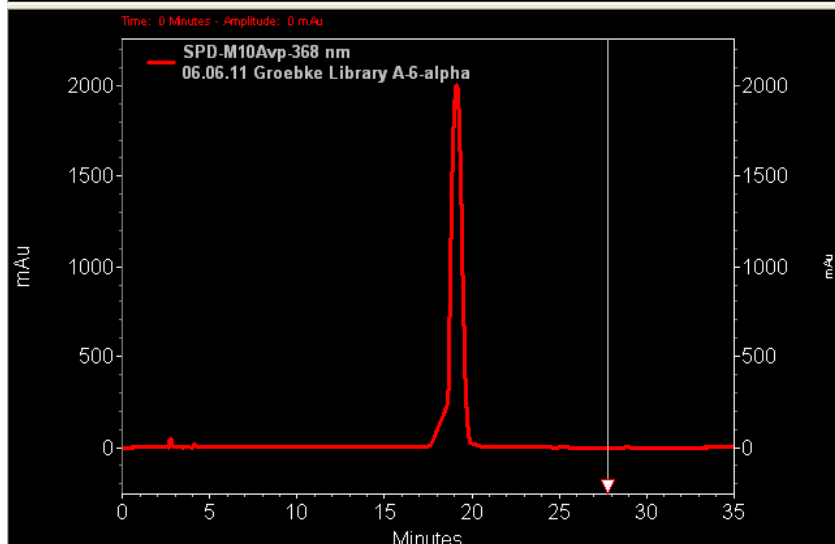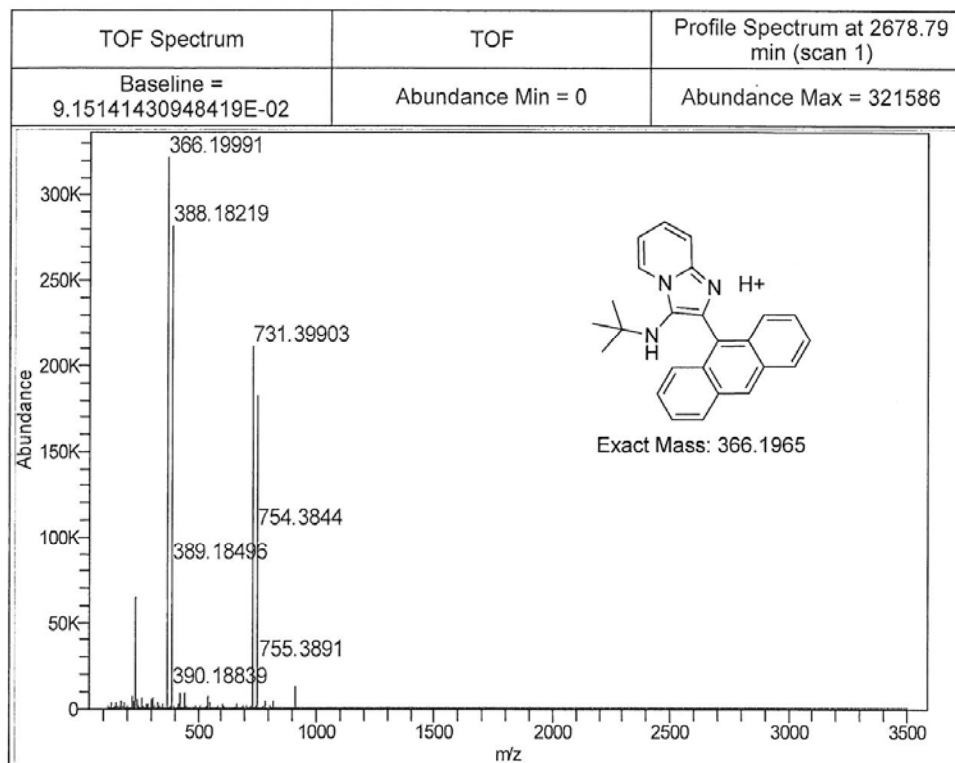

# 1h <sup>1</sup>H Spectrum

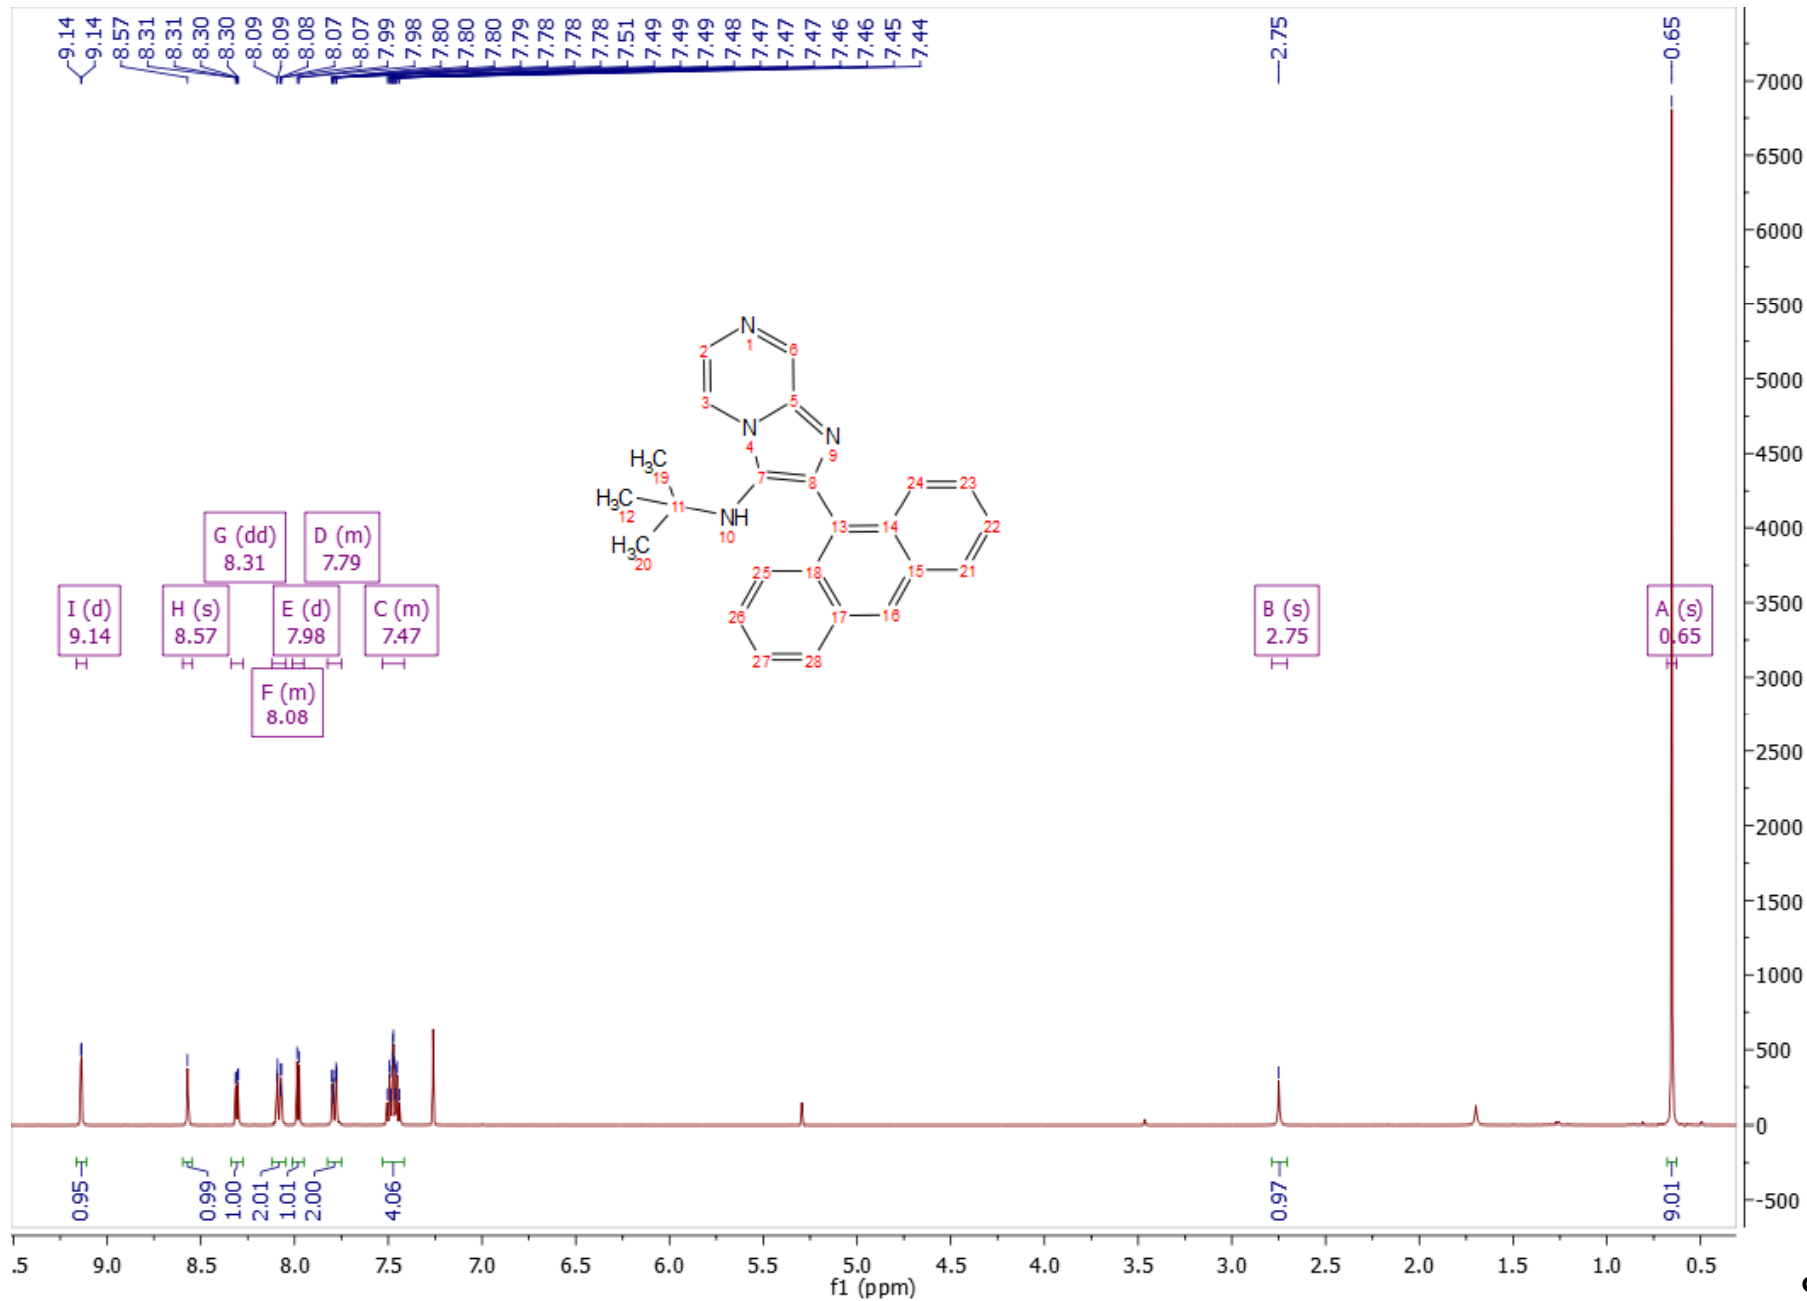

# 1h <sup>13</sup>C Spectrum

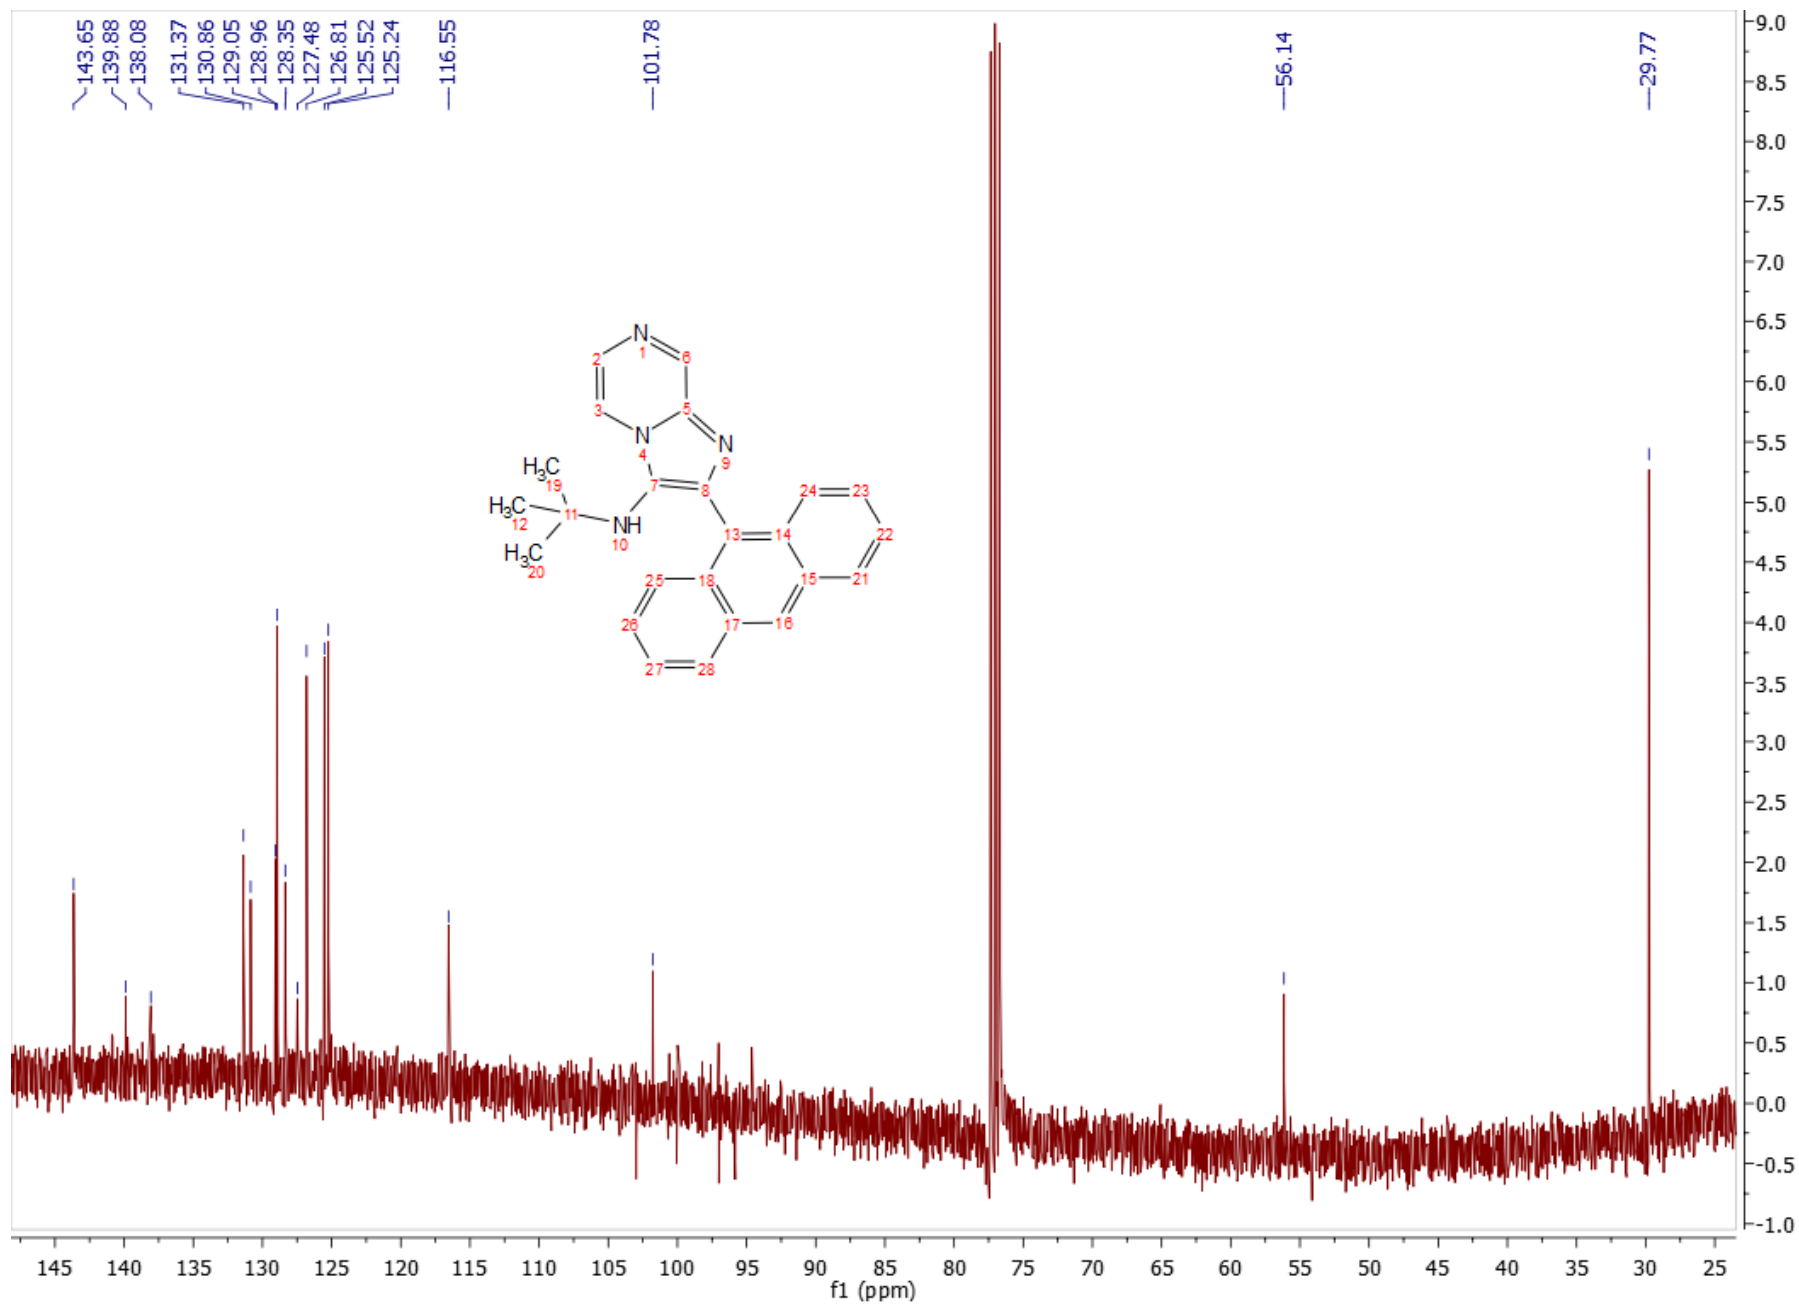



# 1h LC-MS

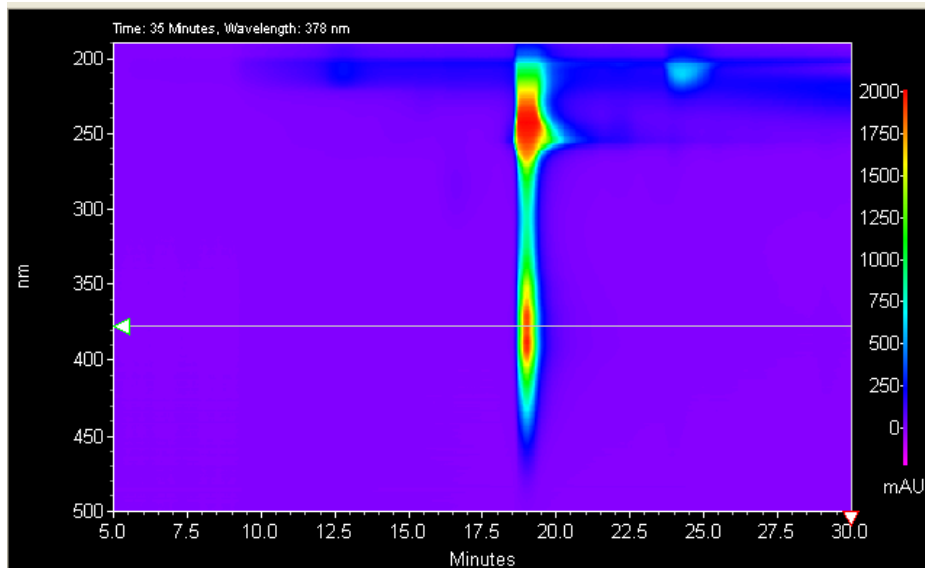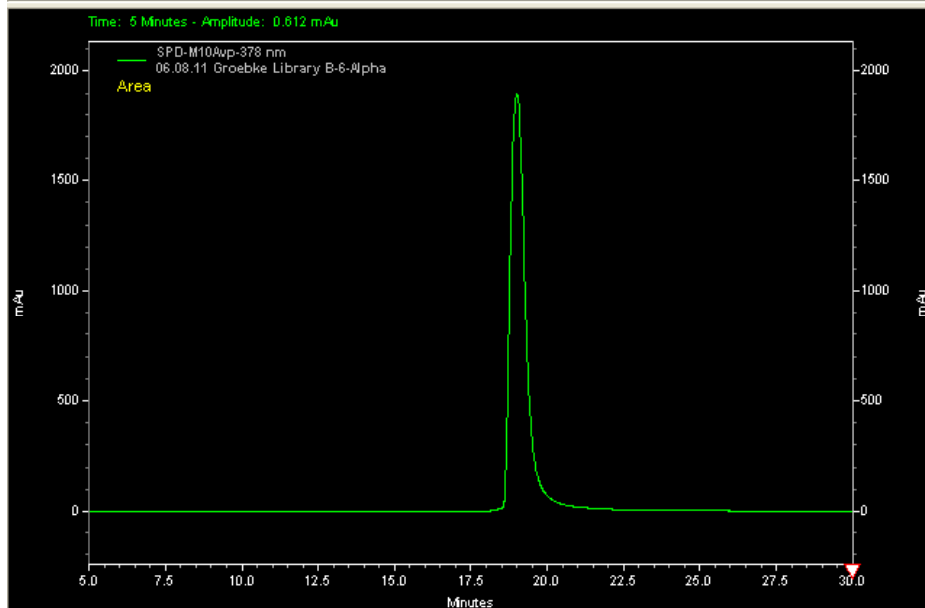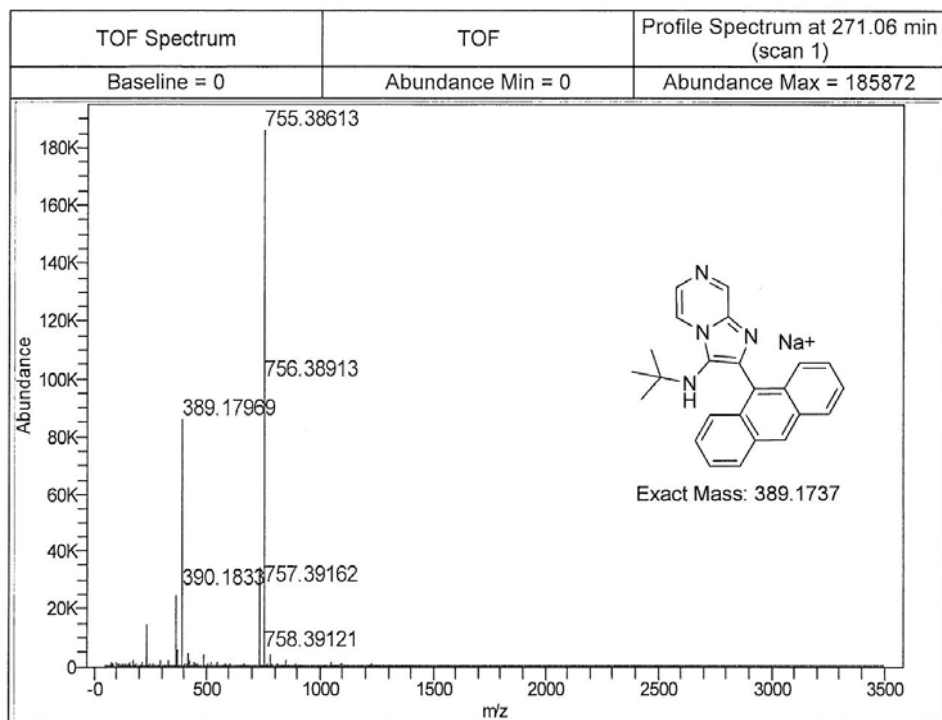

## 2a <sup>1</sup>H Spectrum

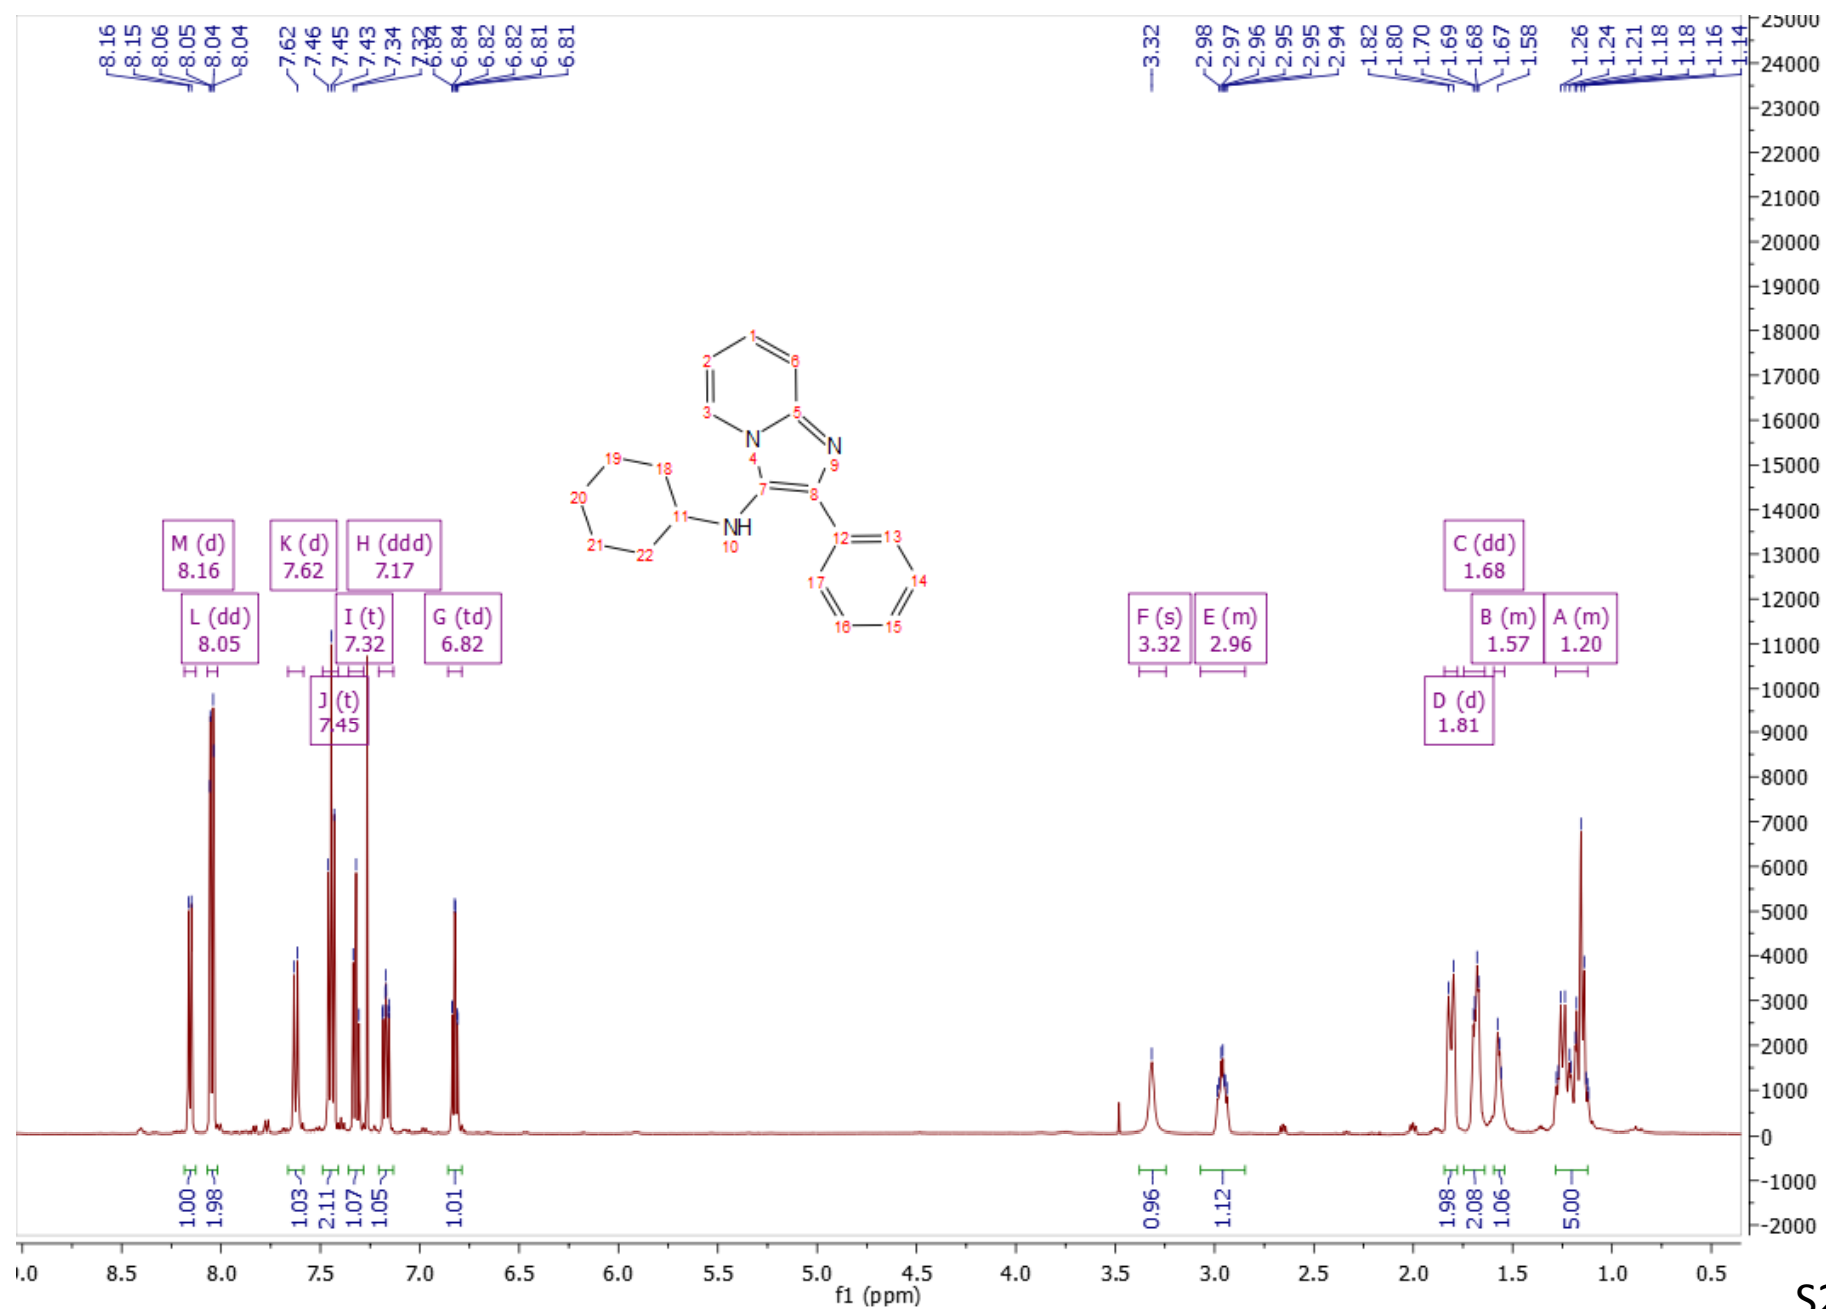

# 2a <sup>13</sup>C Spectrum

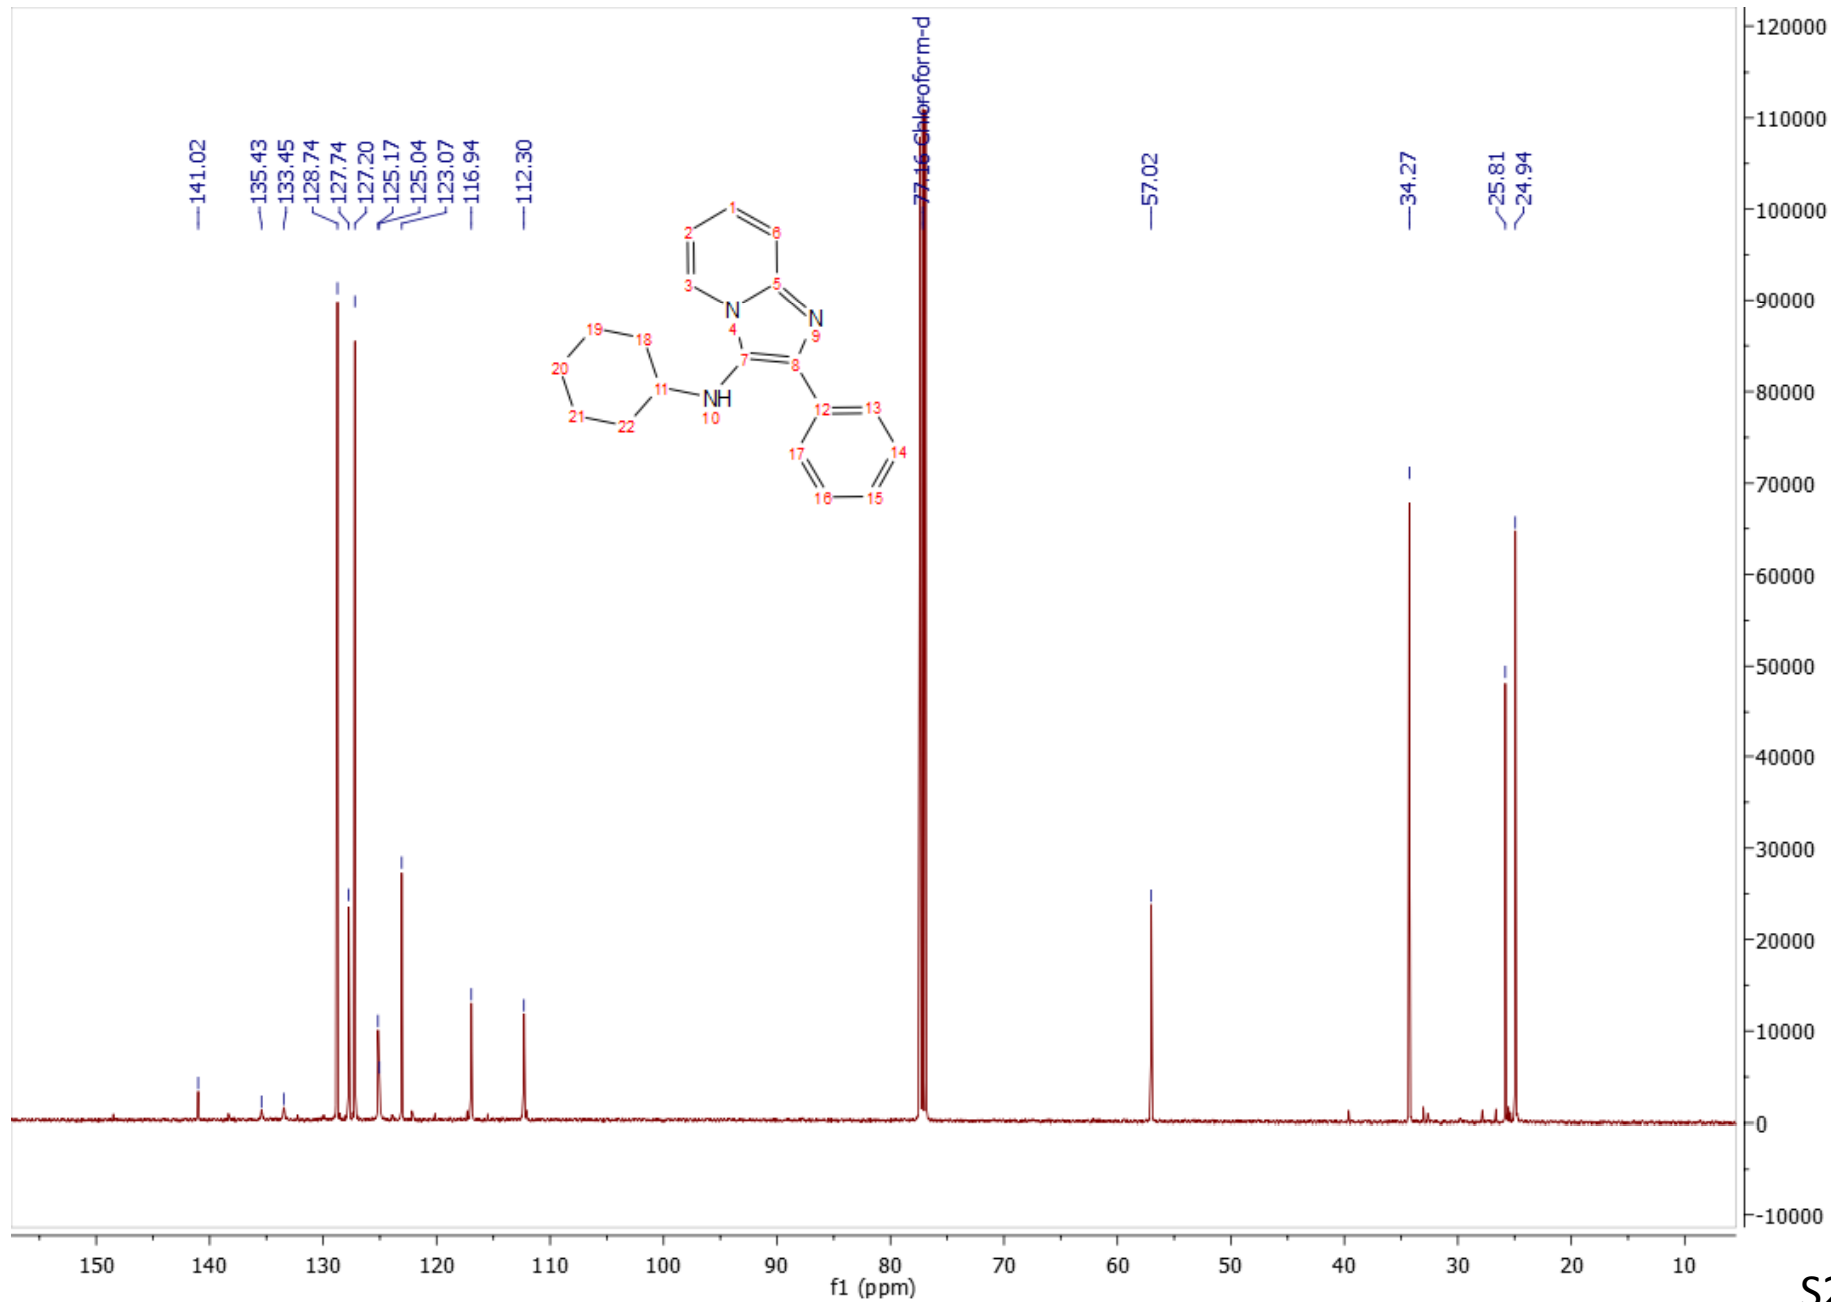

## 2a LC-MS

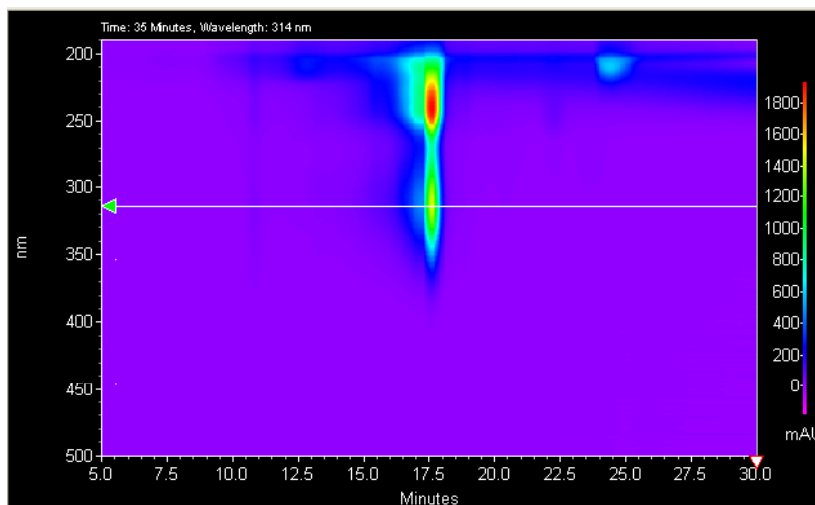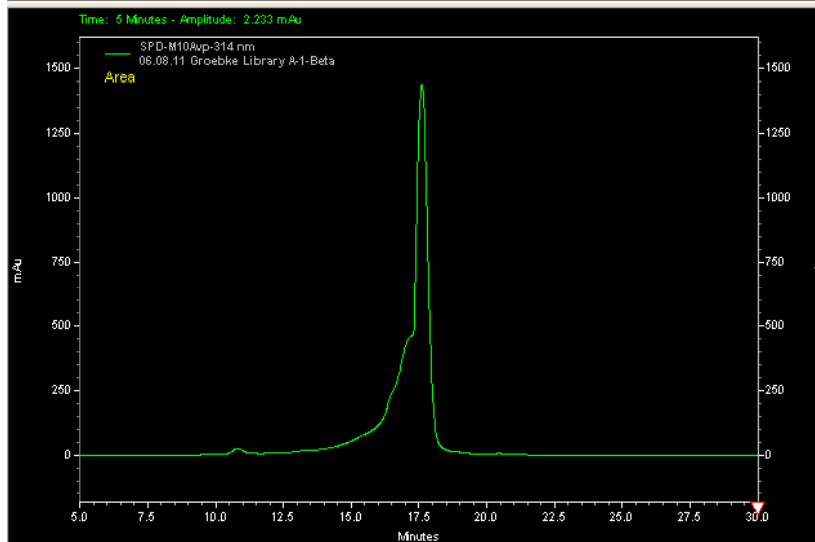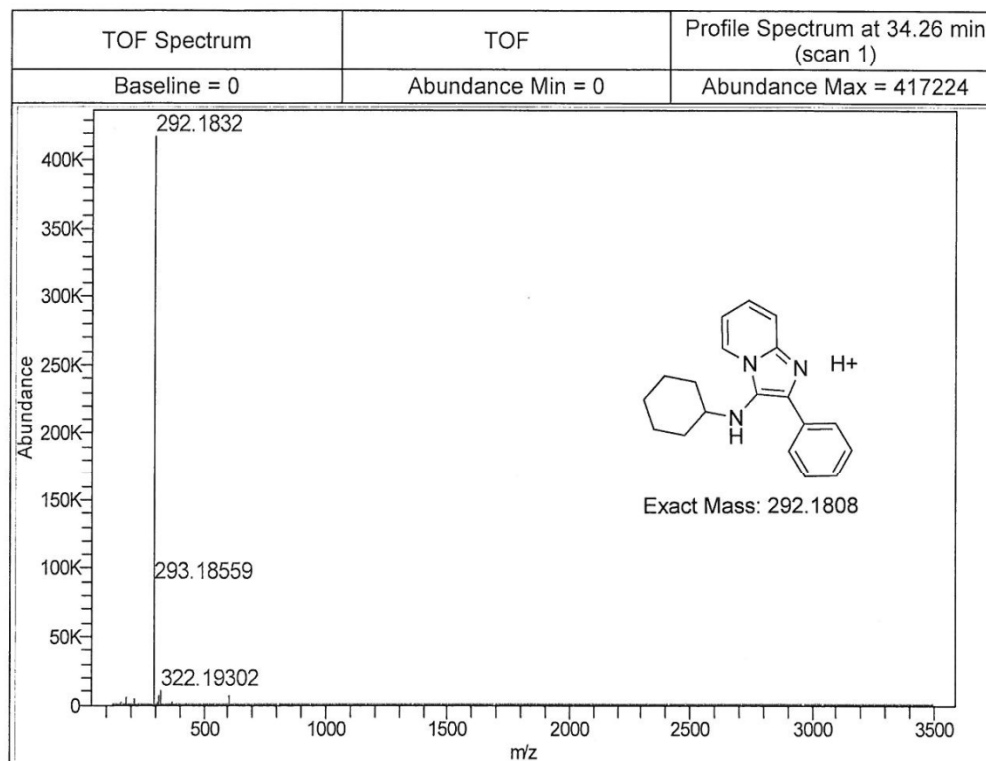

## 2b <sup>1</sup>H Spectrum

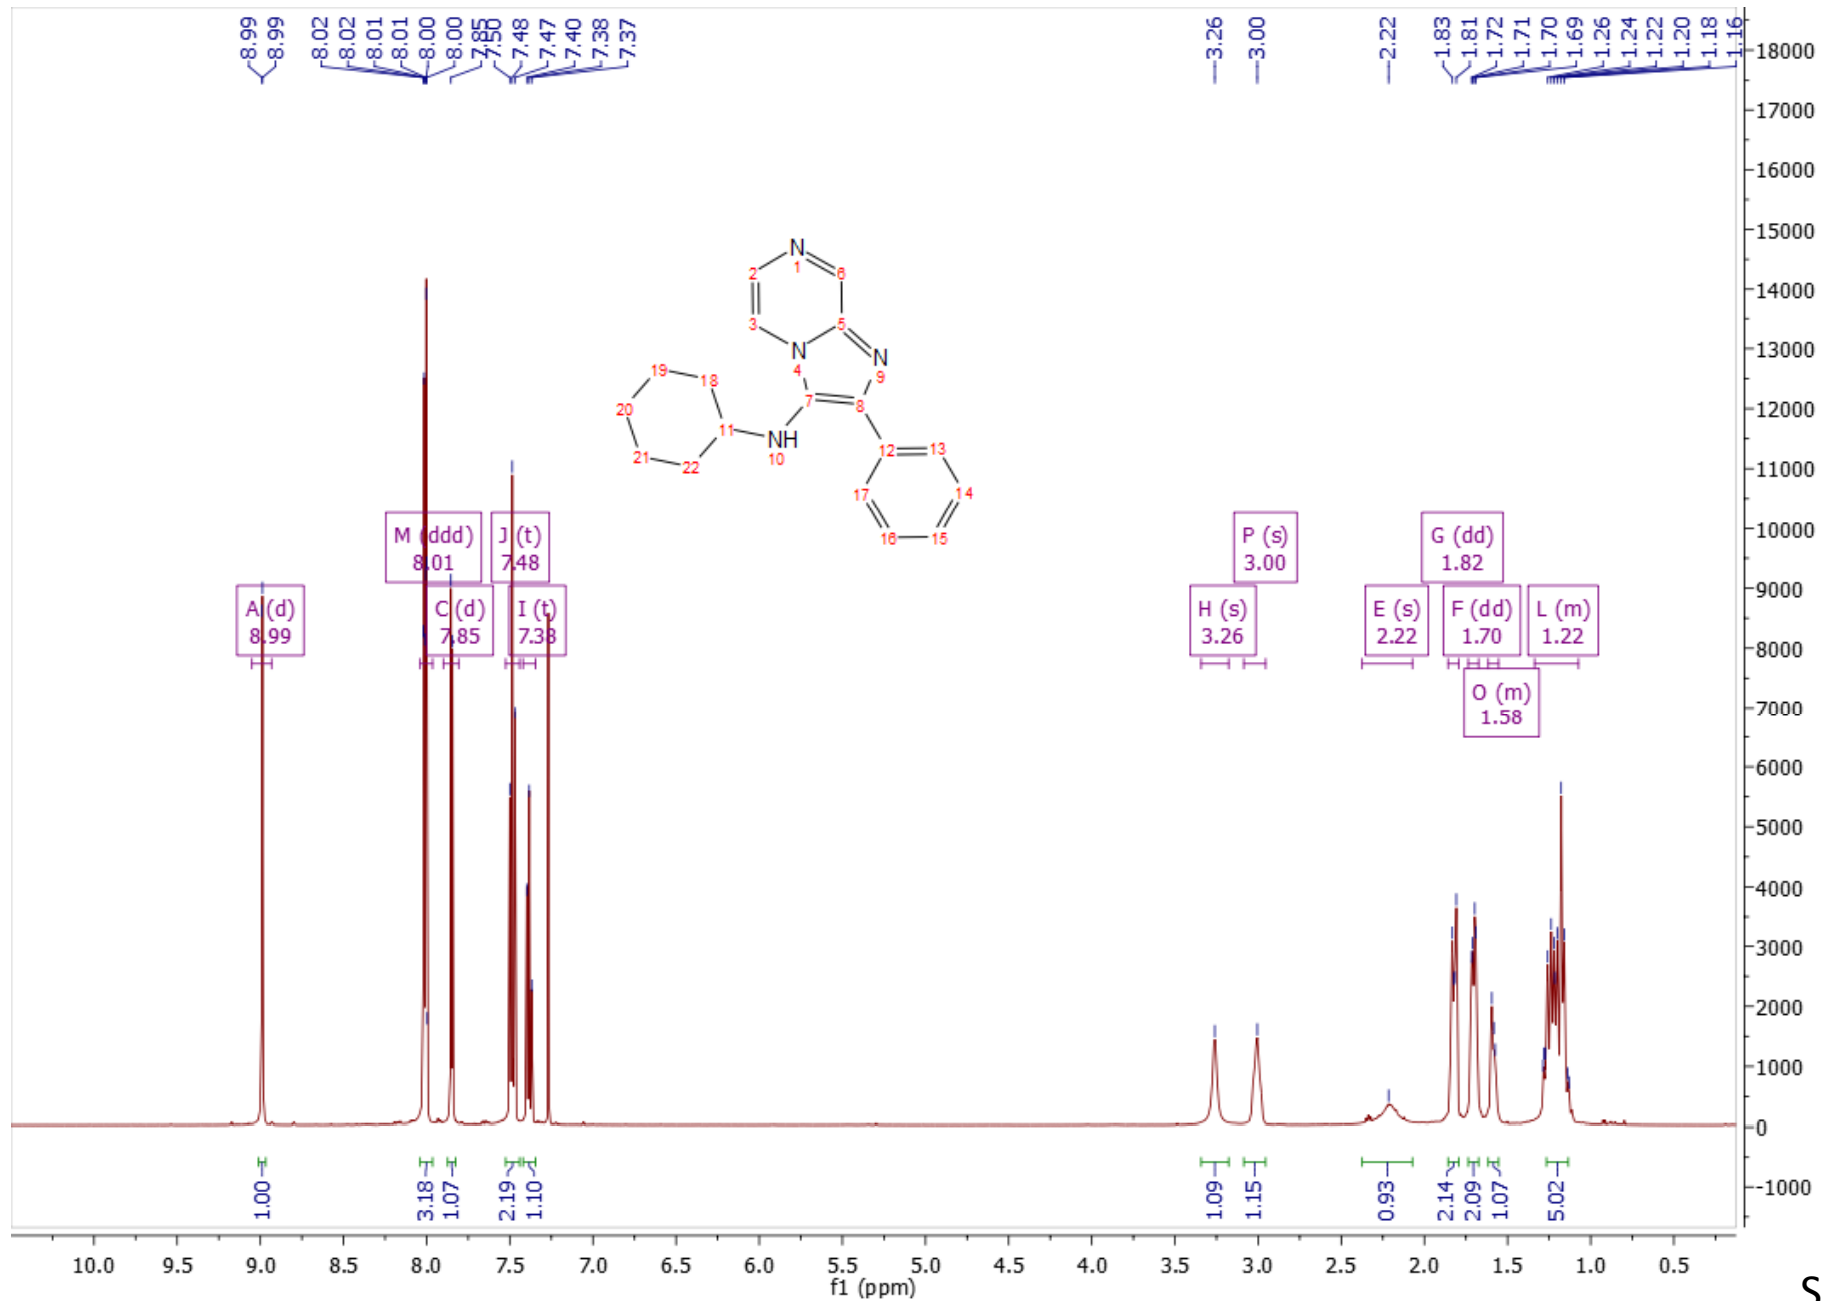

## 2b <sup>13</sup>C Spectrum

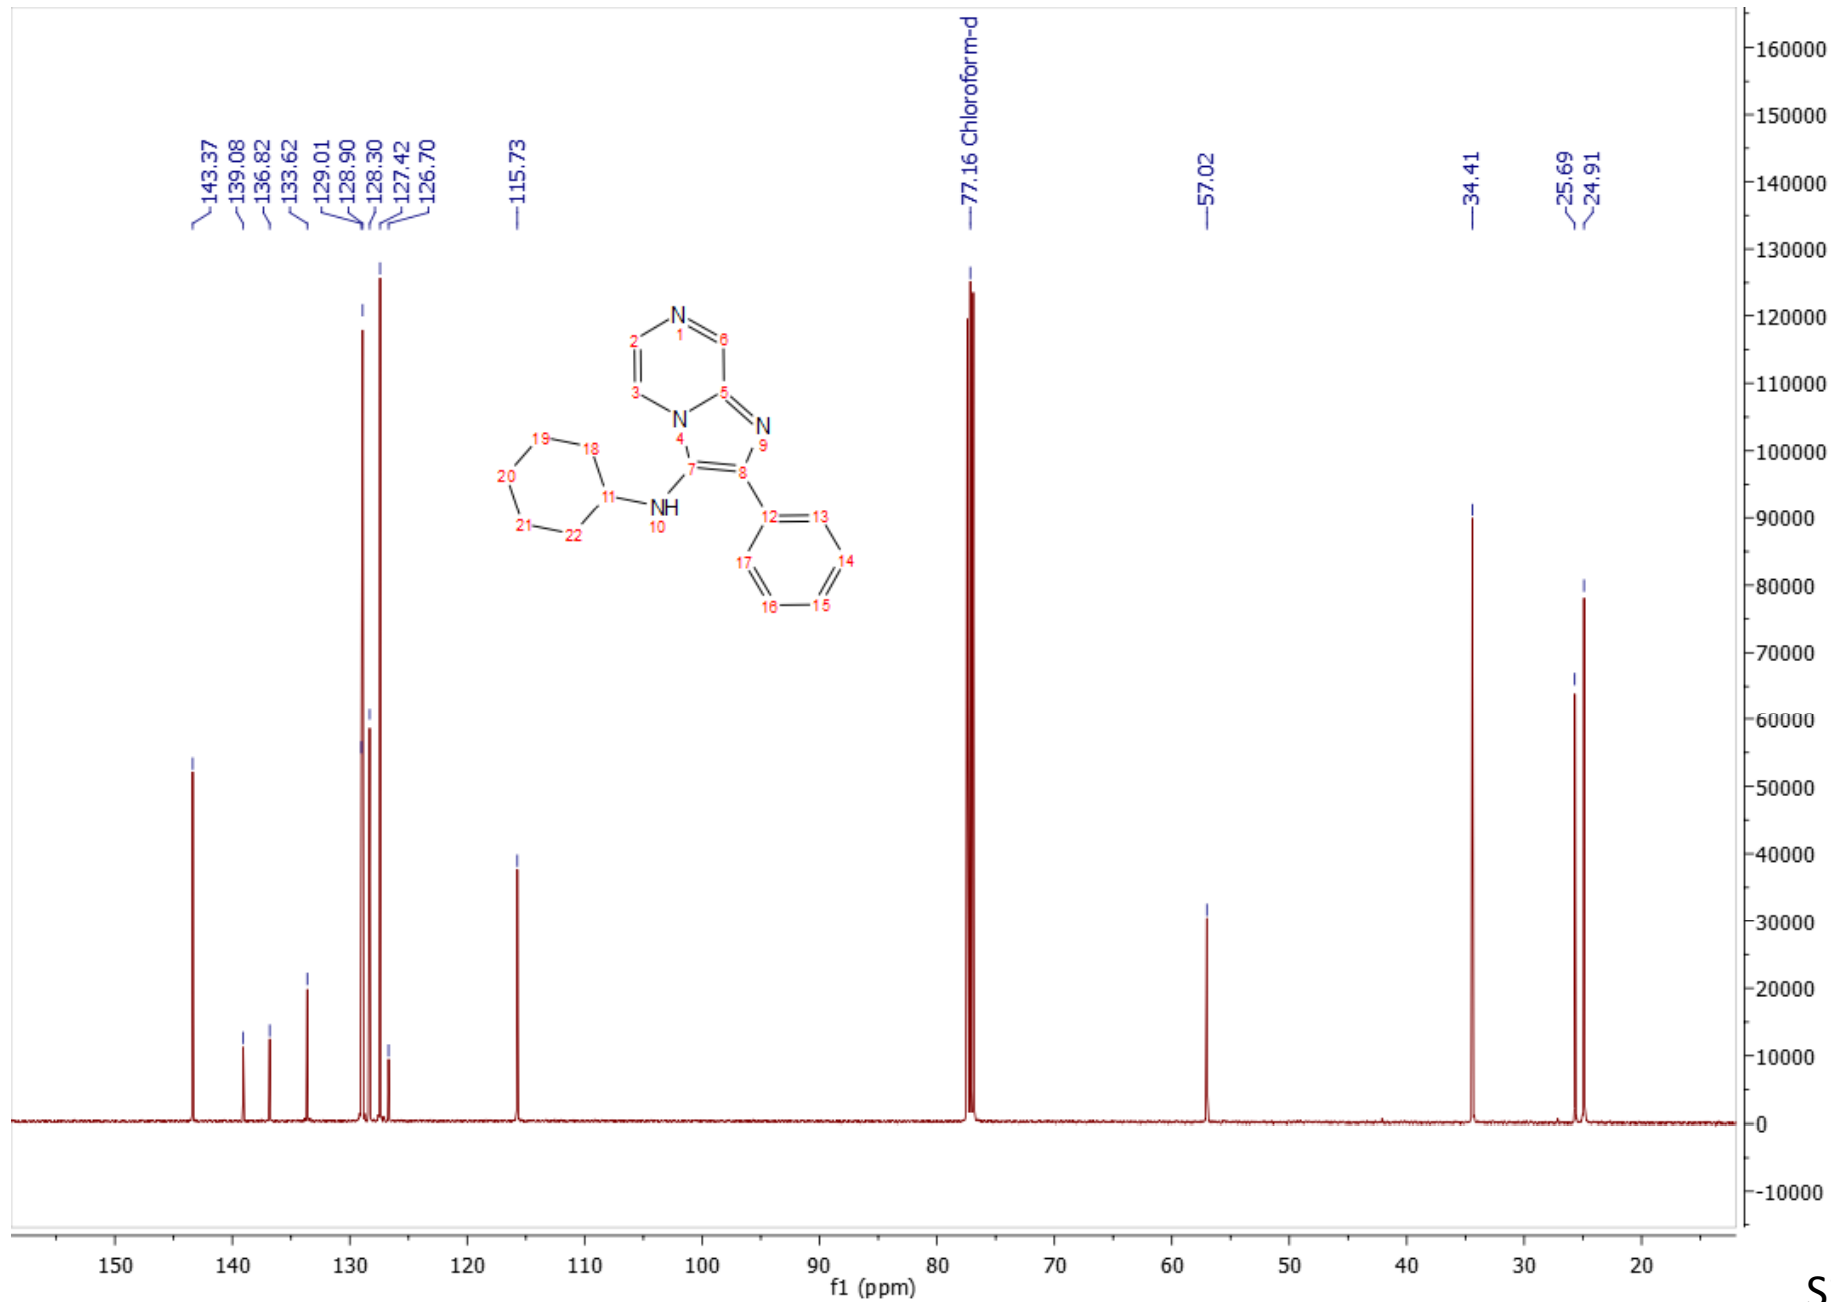

## 2b LC-MS

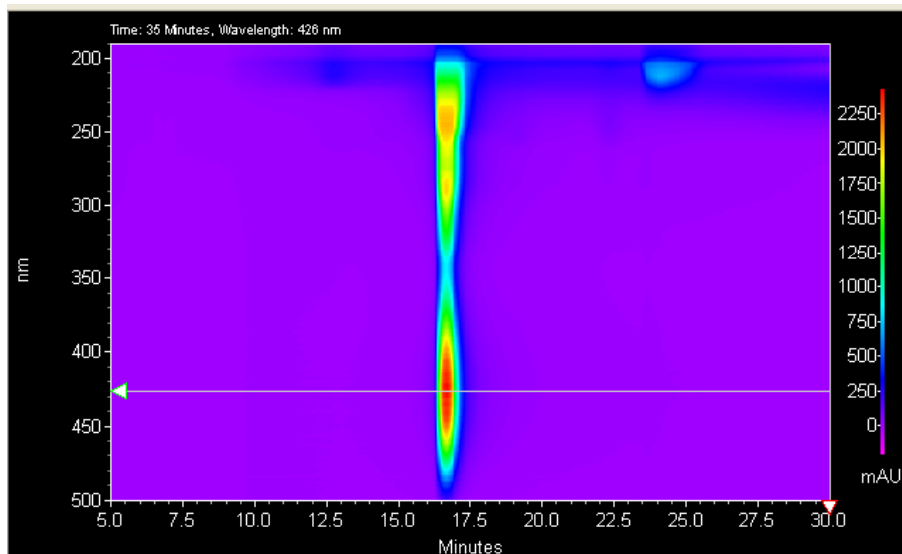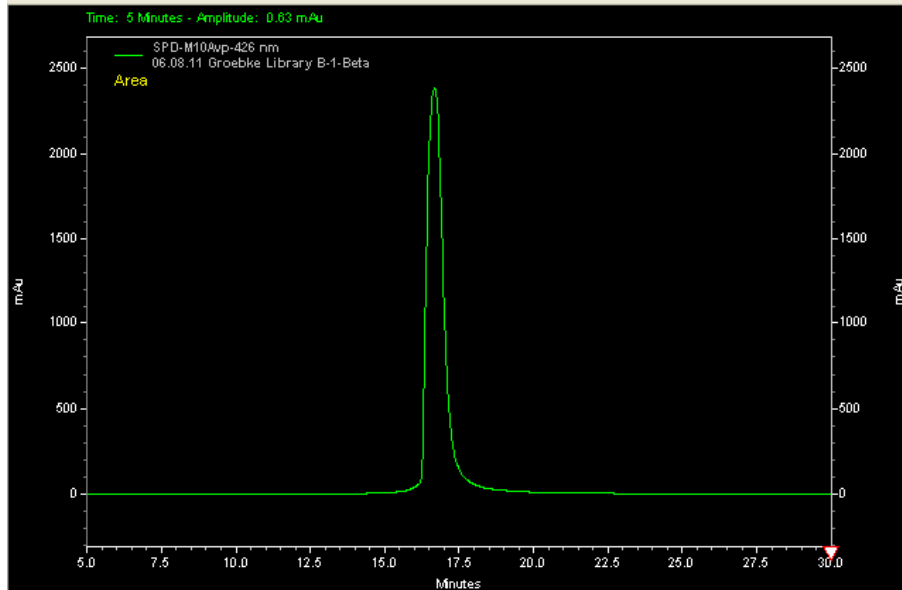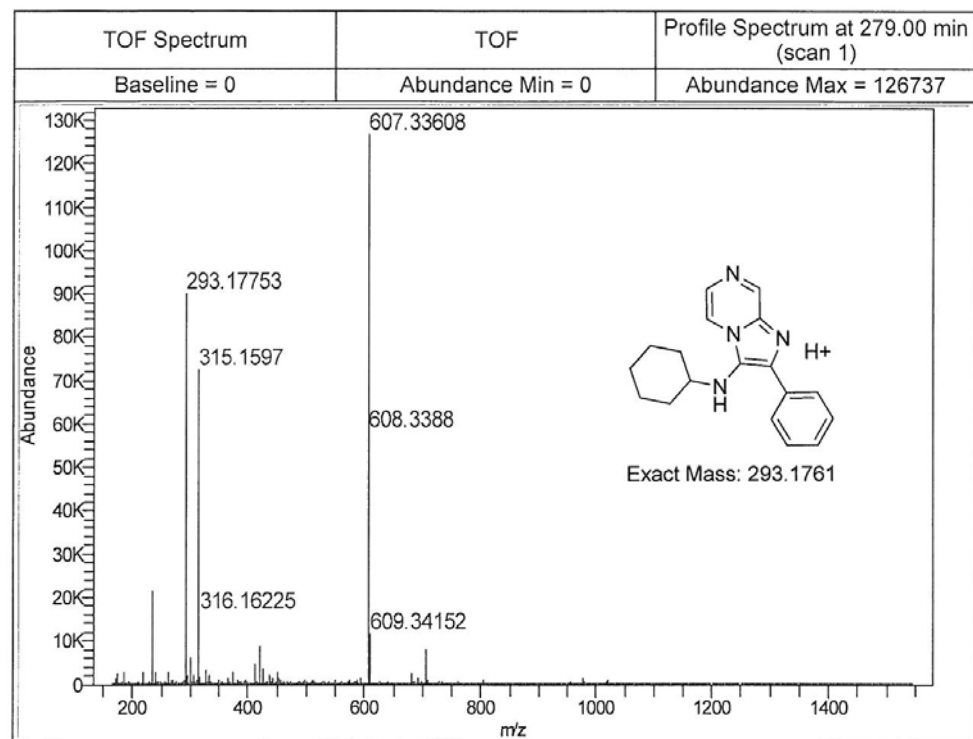

# 2c <sup>1</sup>H Spectrum

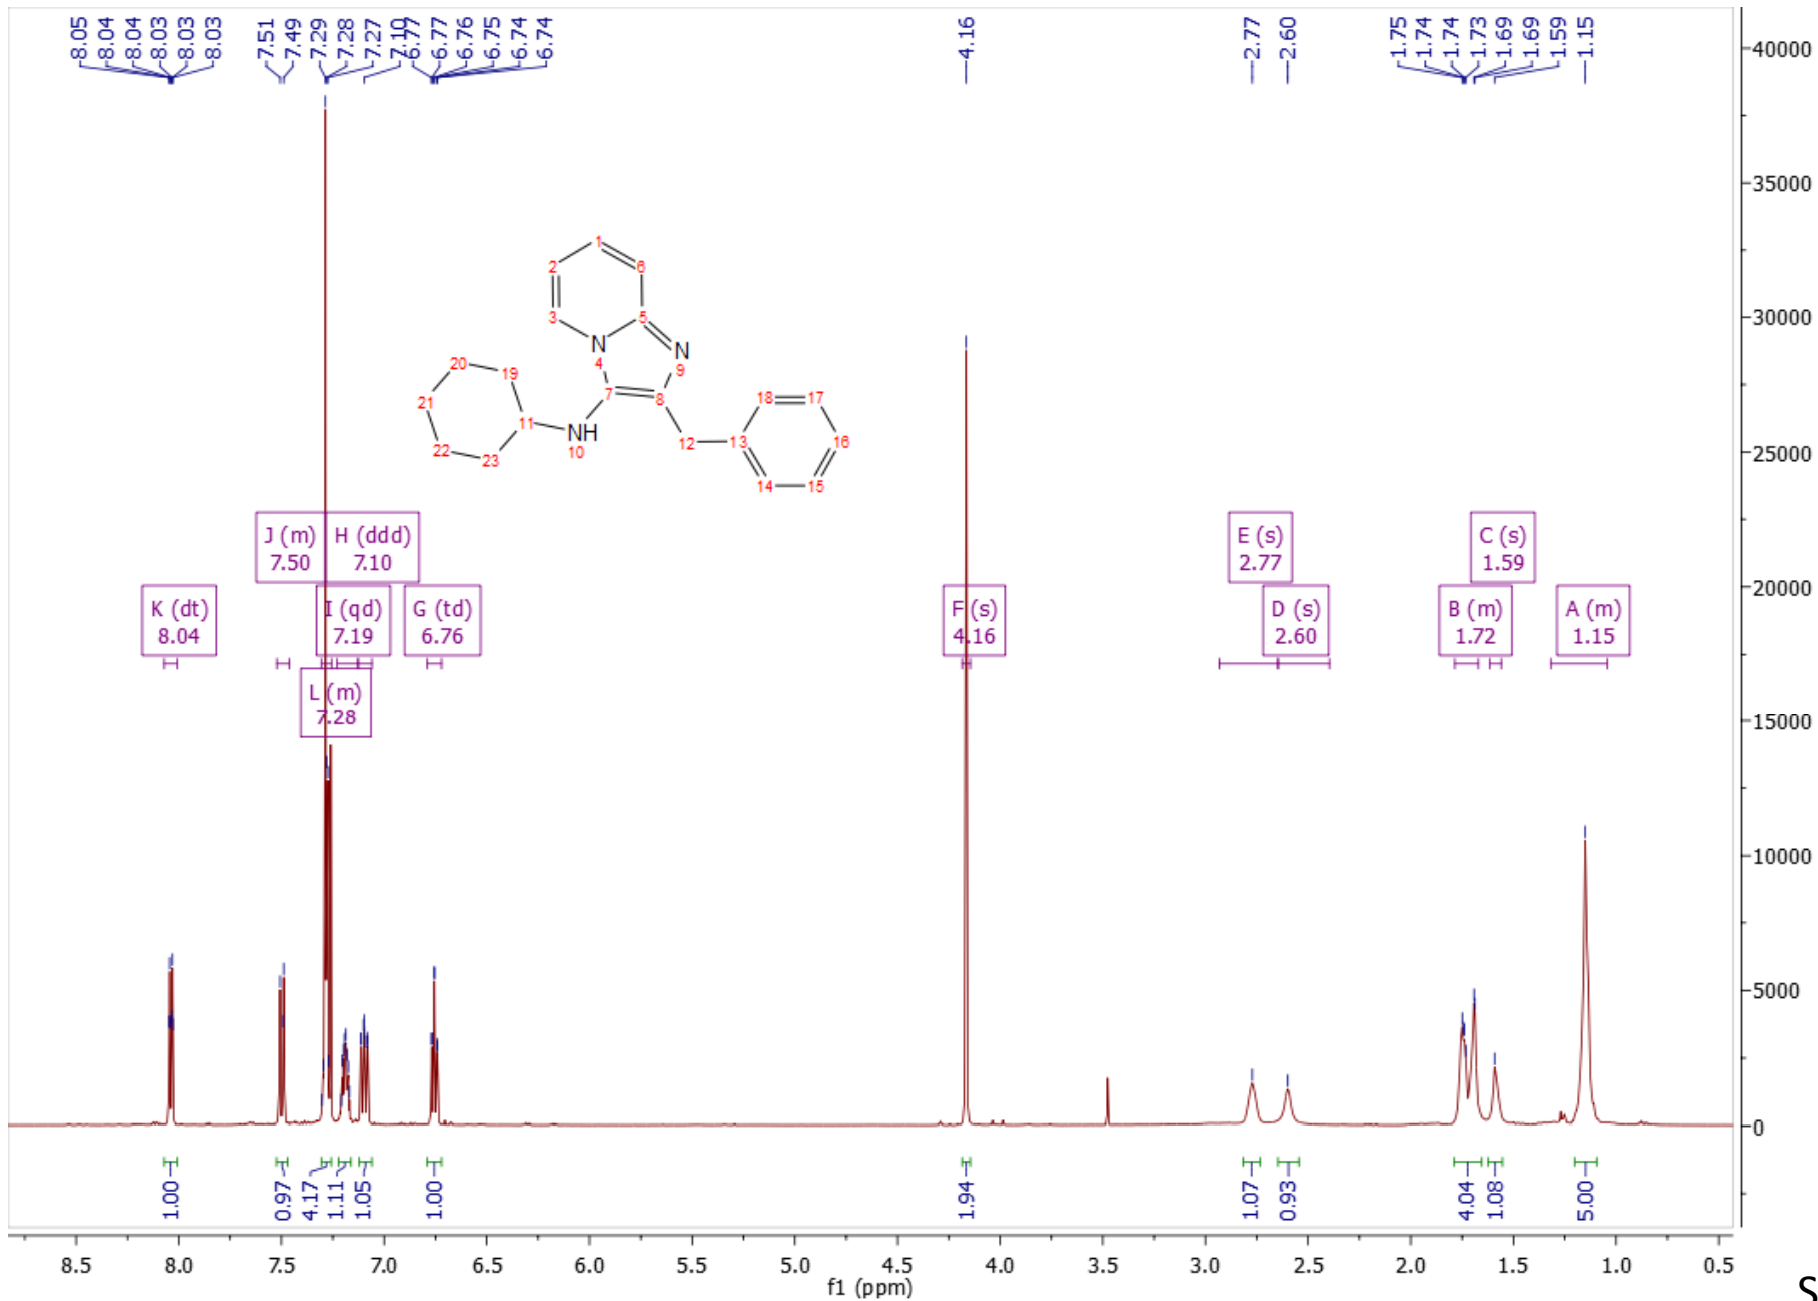



# 2c <sup>13</sup>C Spectrum

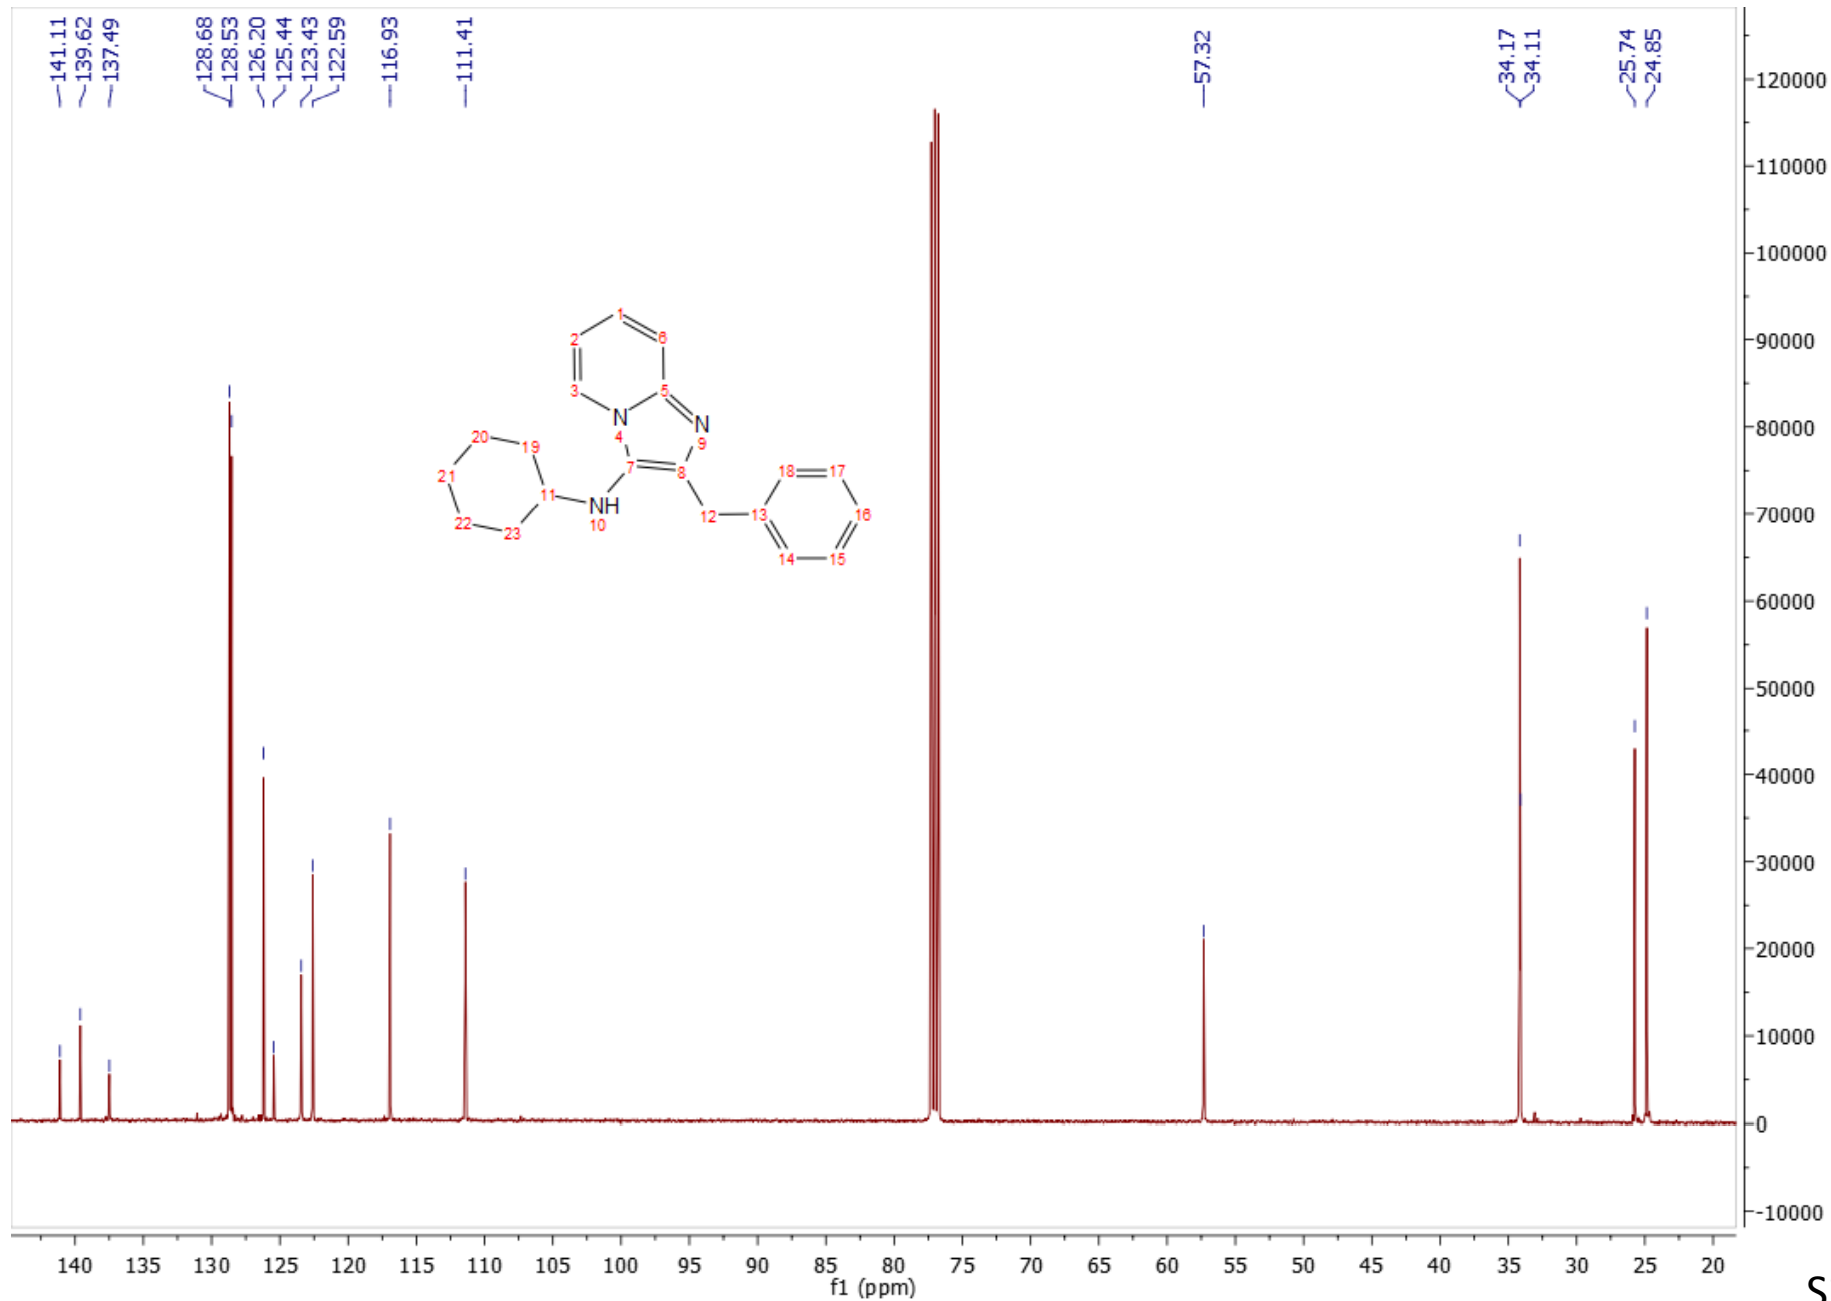

## 2c LC-MS

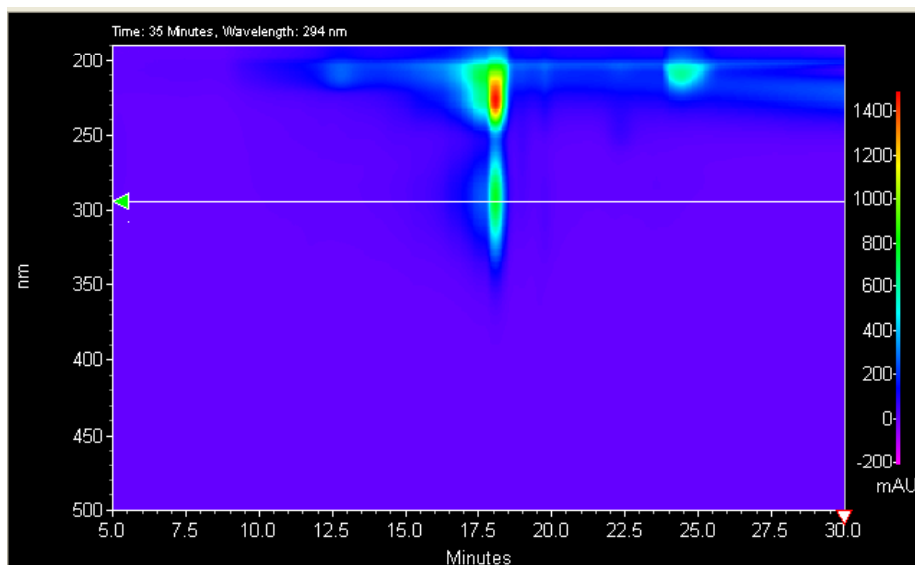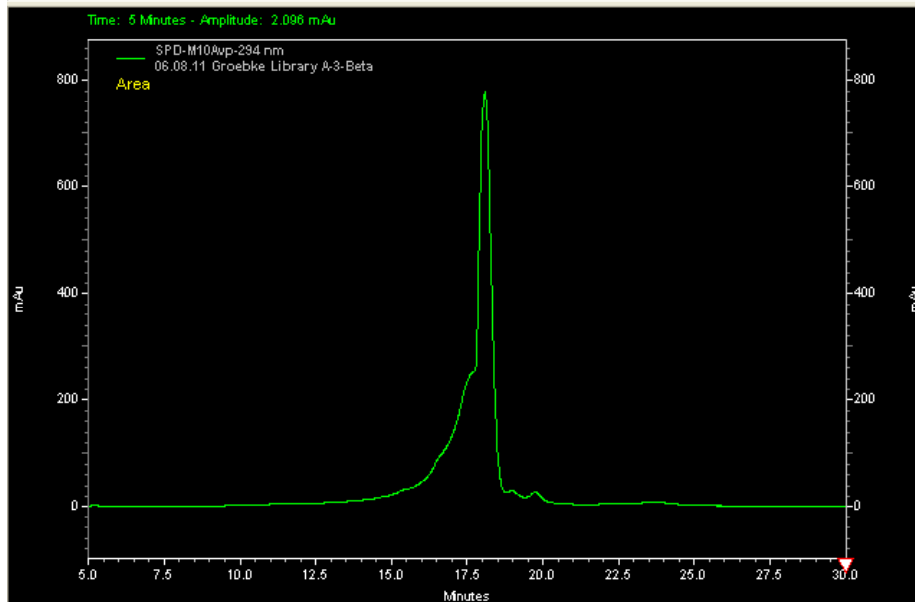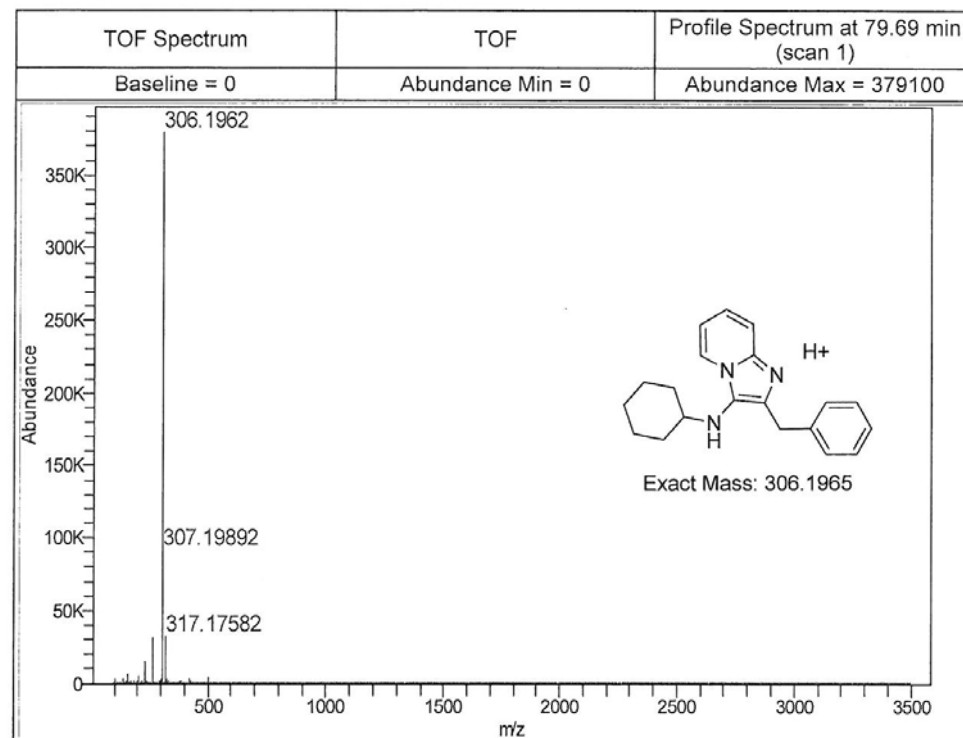

# 2d <sup>1</sup>H Spectrum

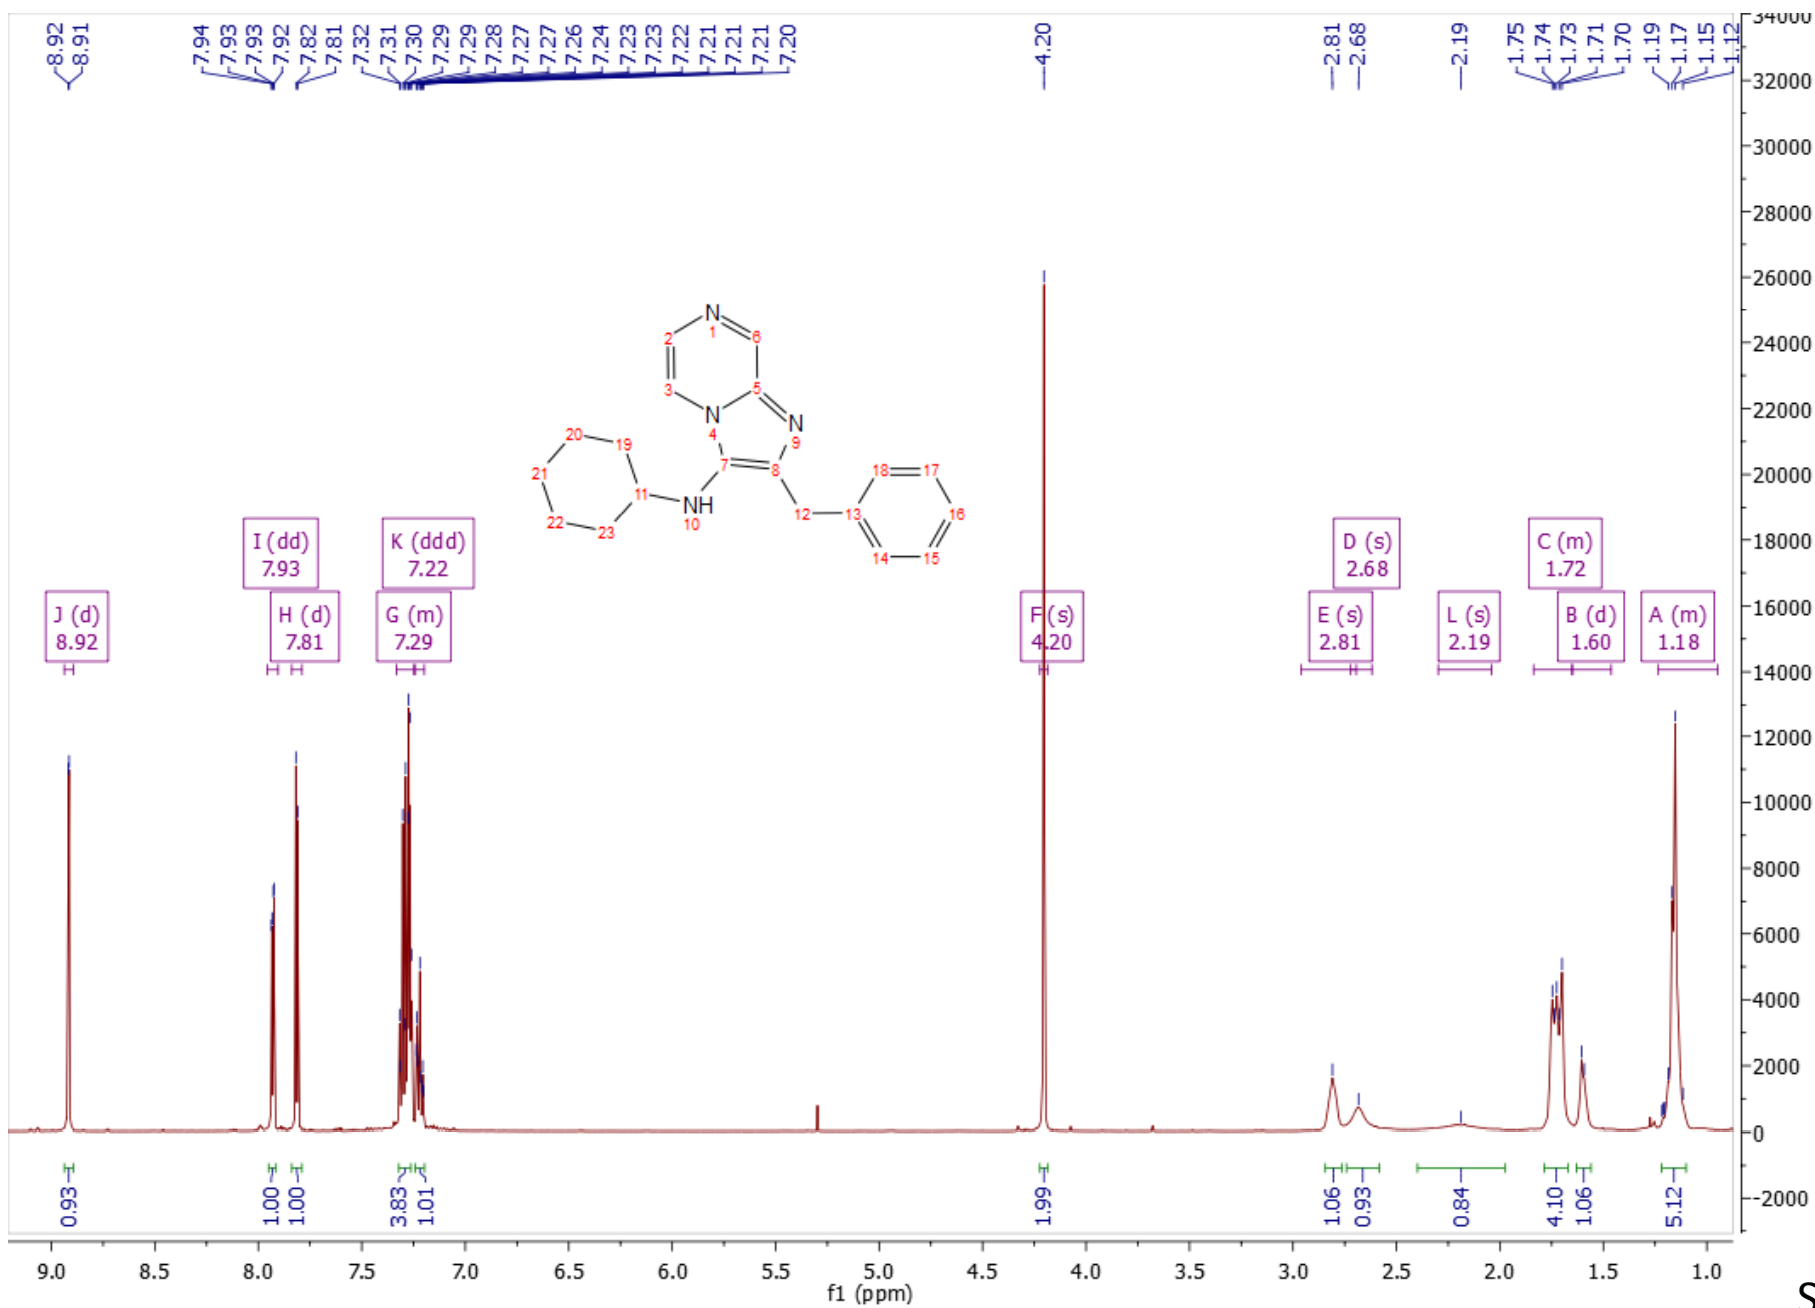

# 2d <sup>13</sup>C Spectrum

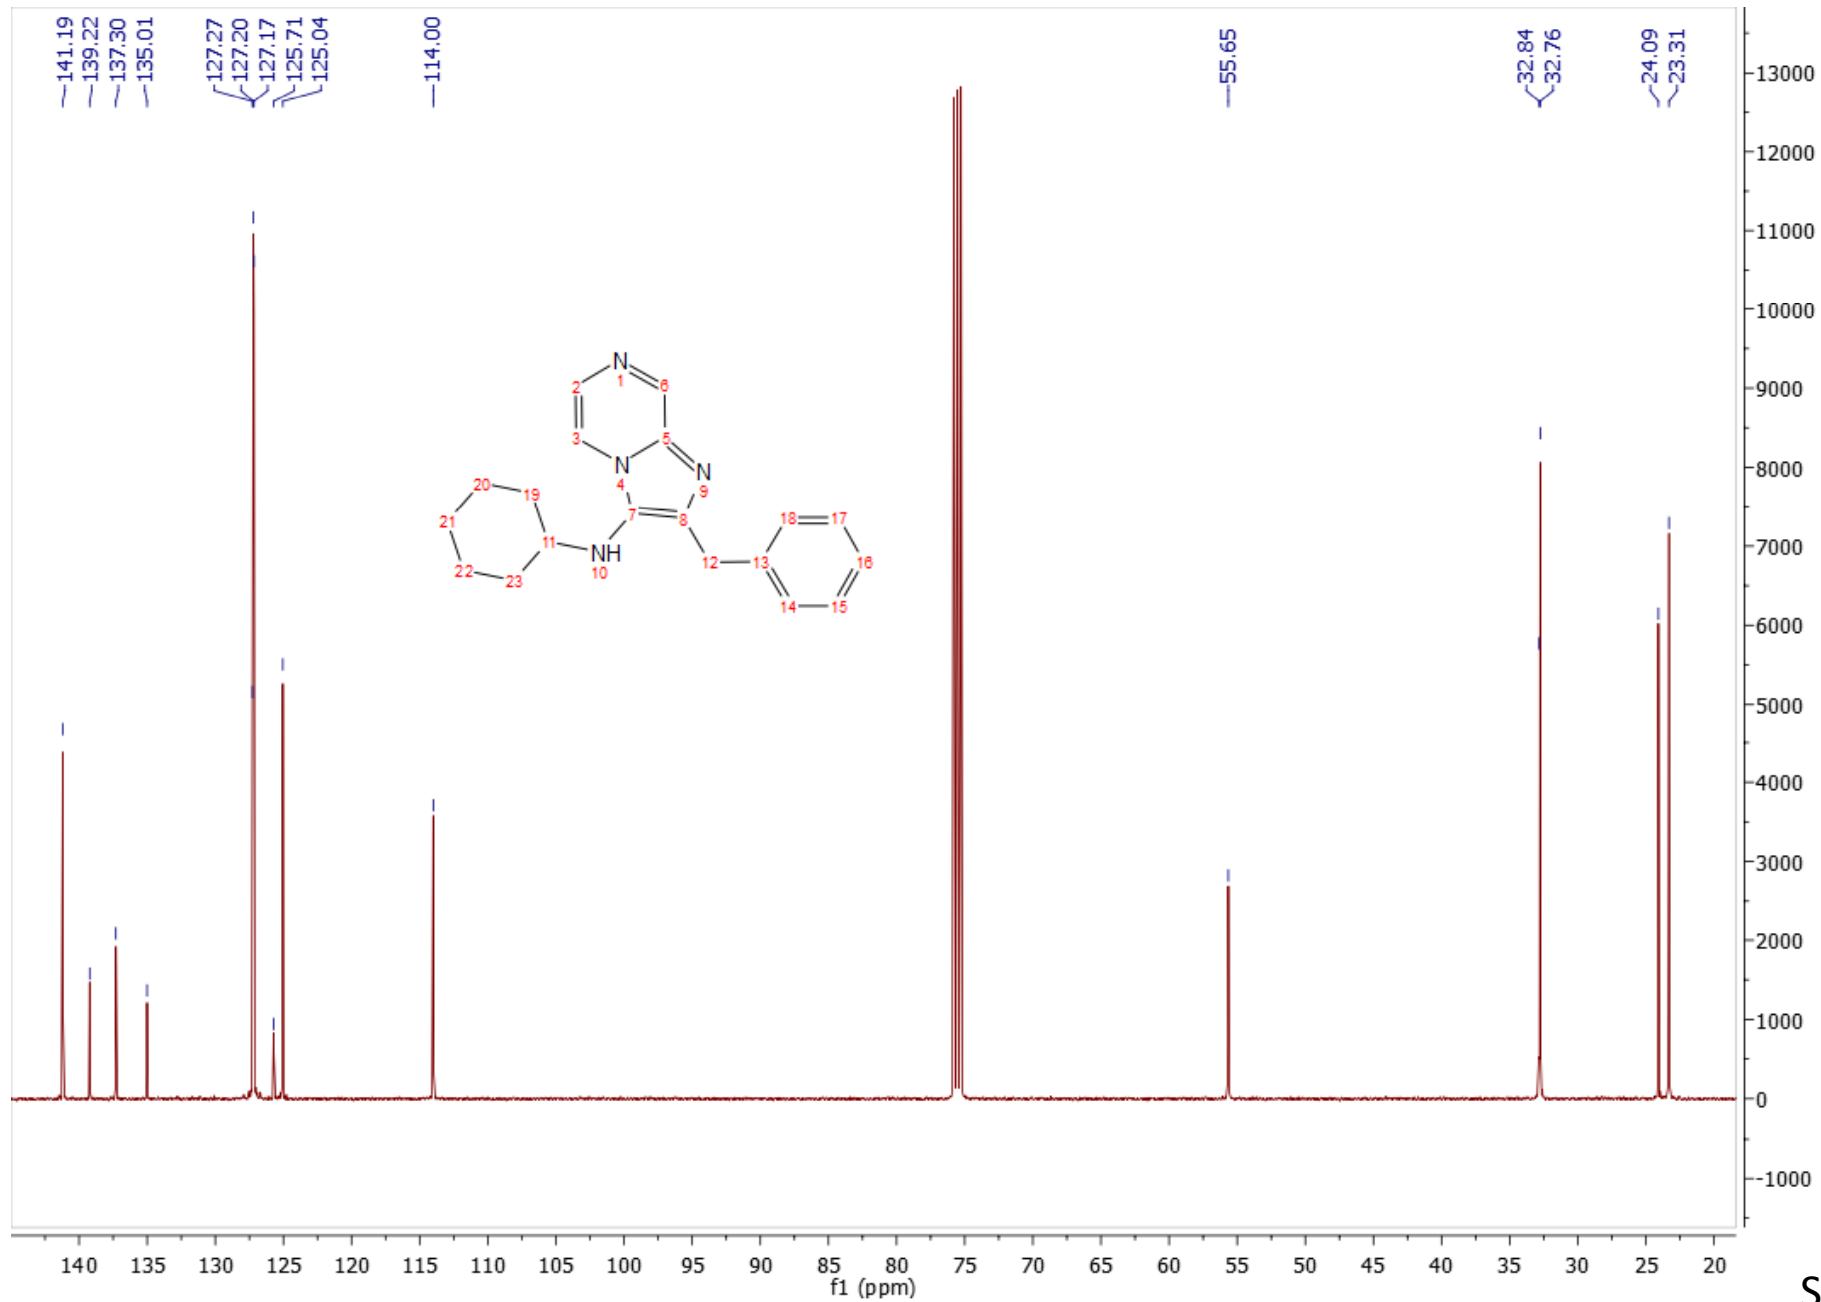

## 2d LC-MS

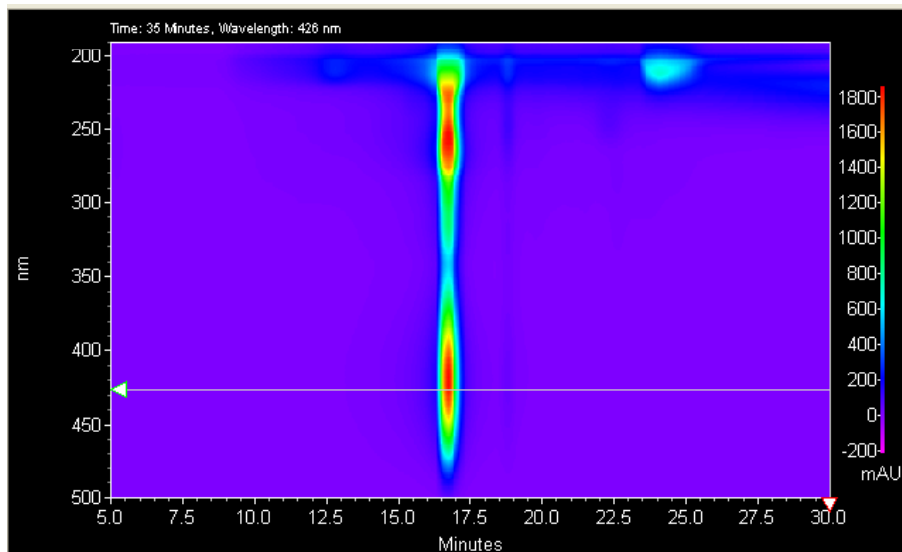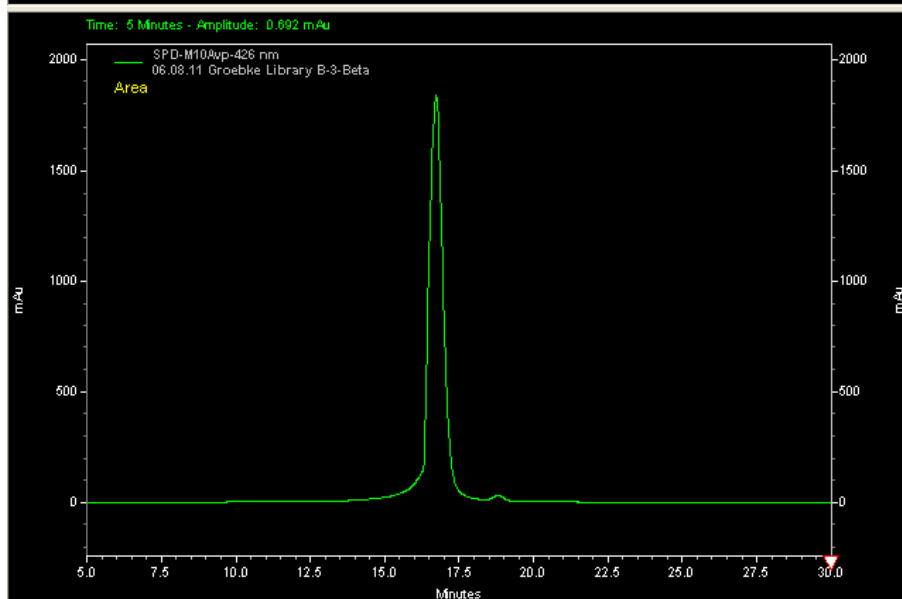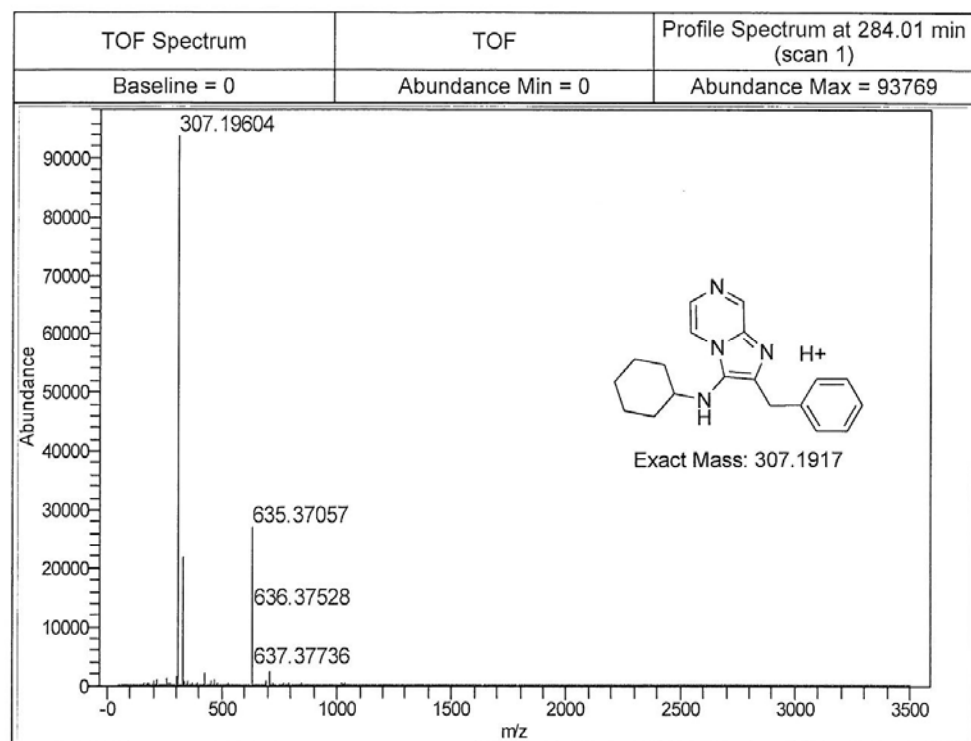

# 2e <sup>1</sup>H Spectrum

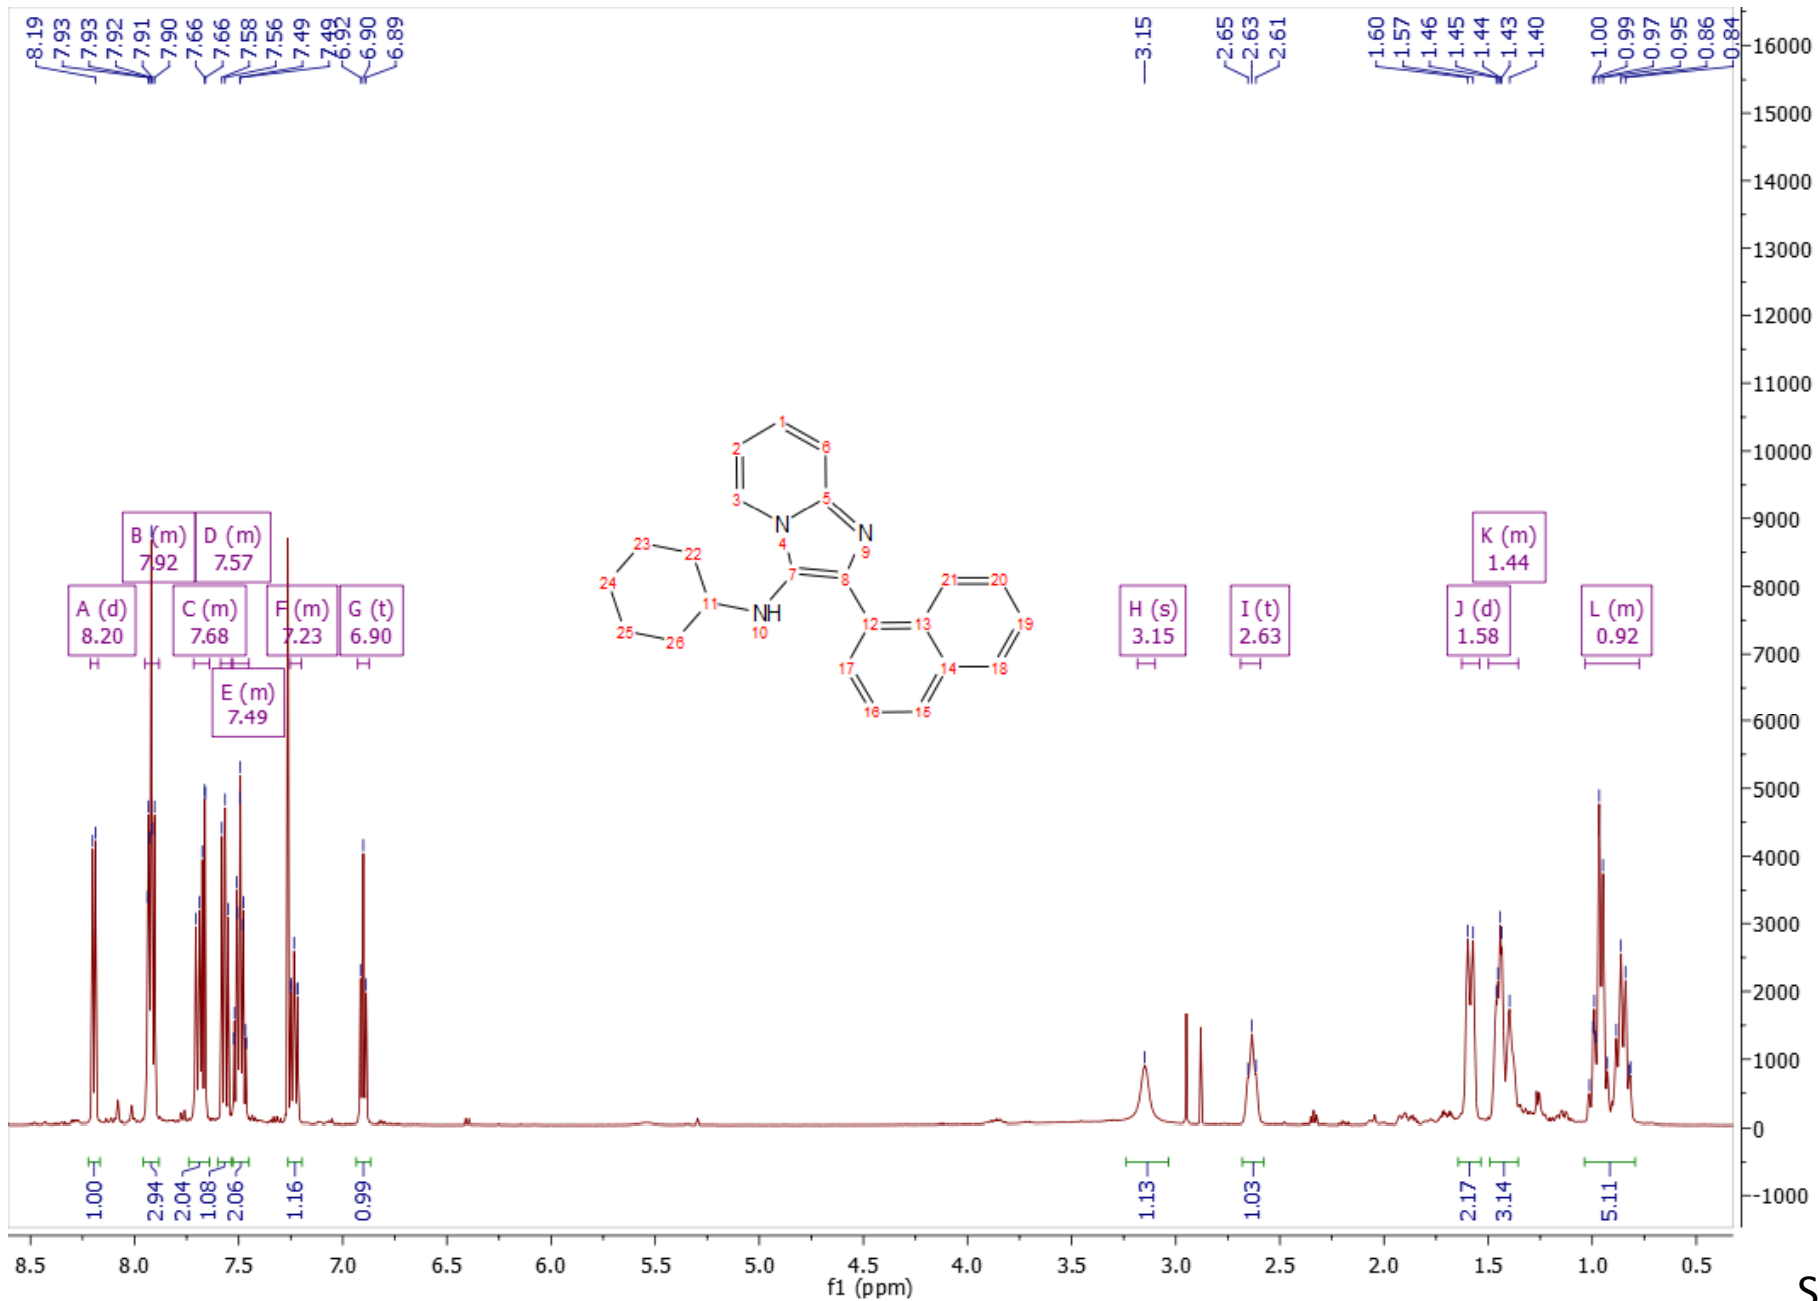

# 2e <sup>13</sup>C Spectrum

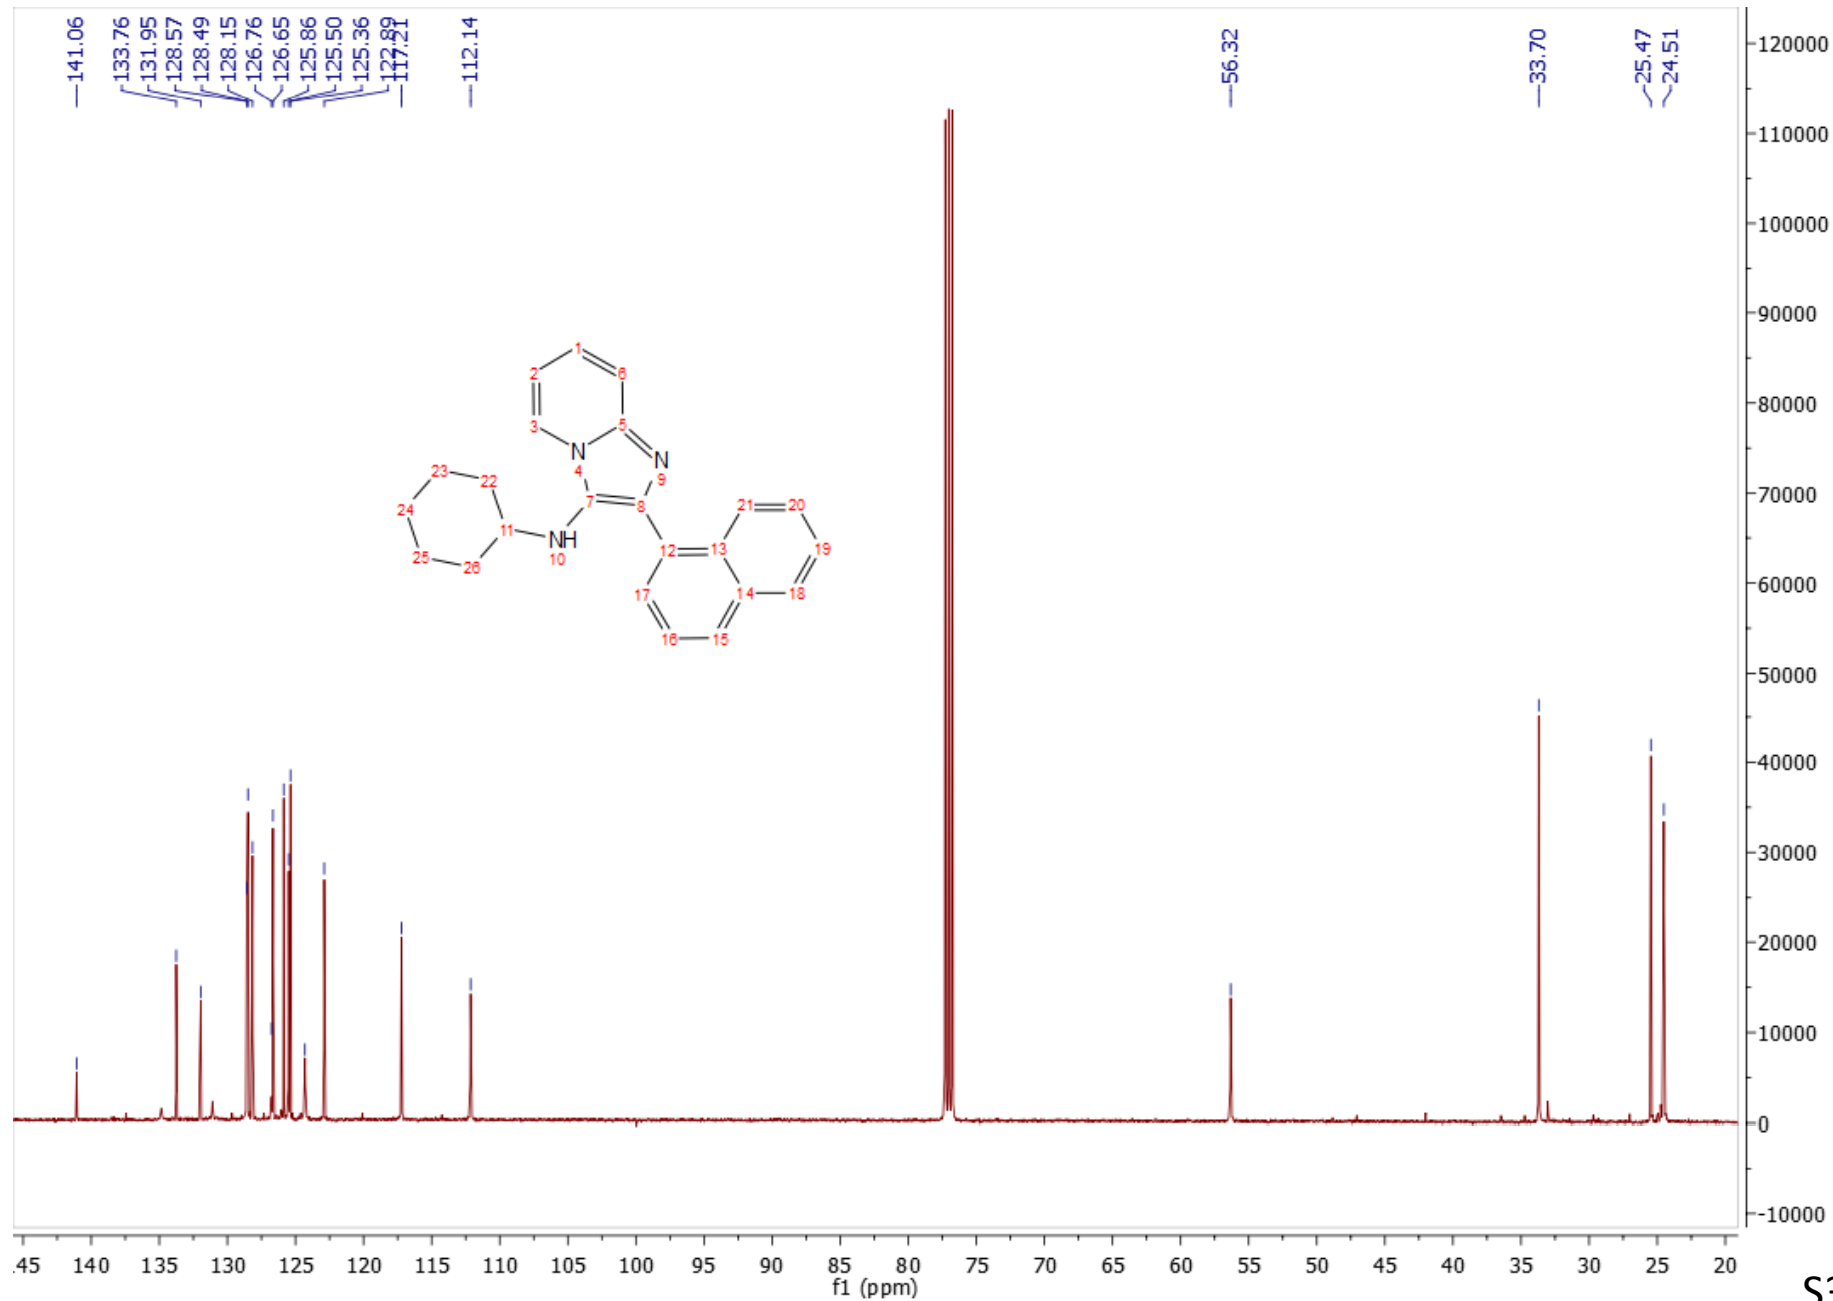

## 2e LC-MS

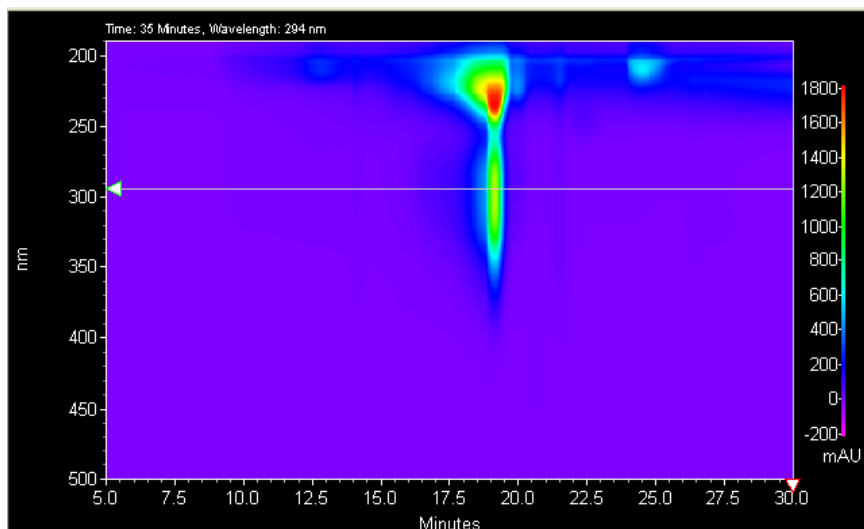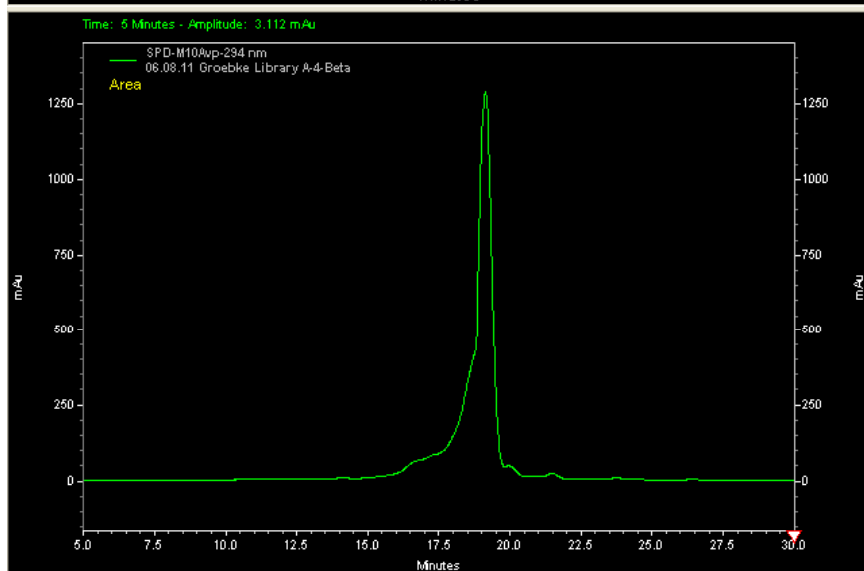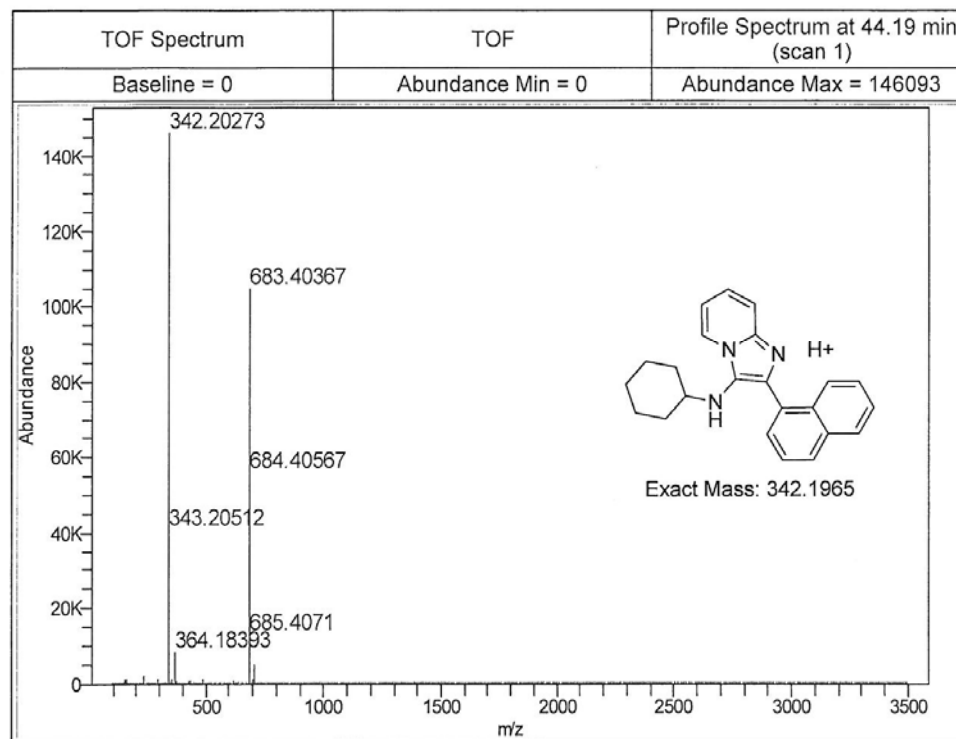



# 2f <sup>1</sup>H Spectrum

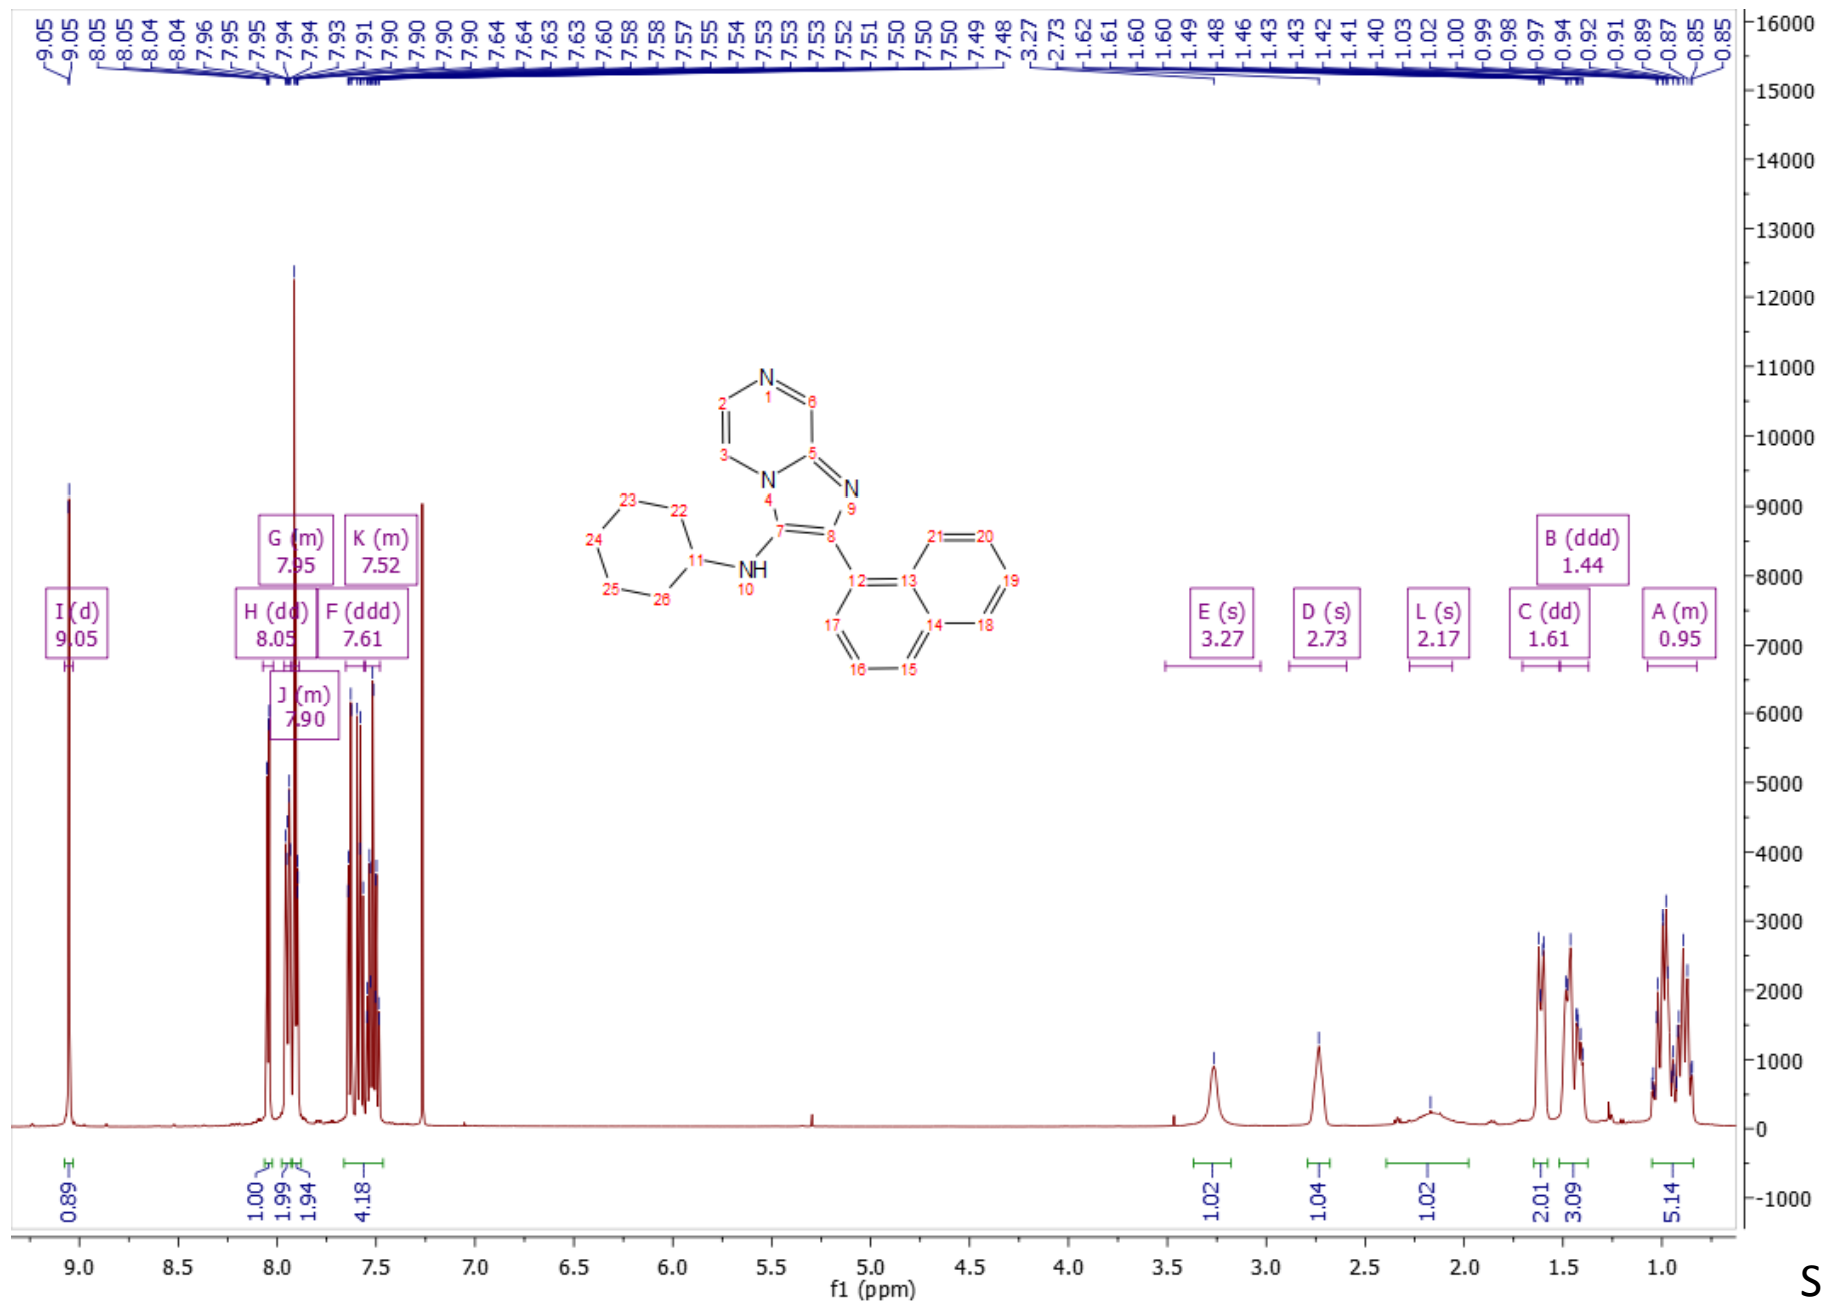

# 2f <sup>13</sup>C Spectrum

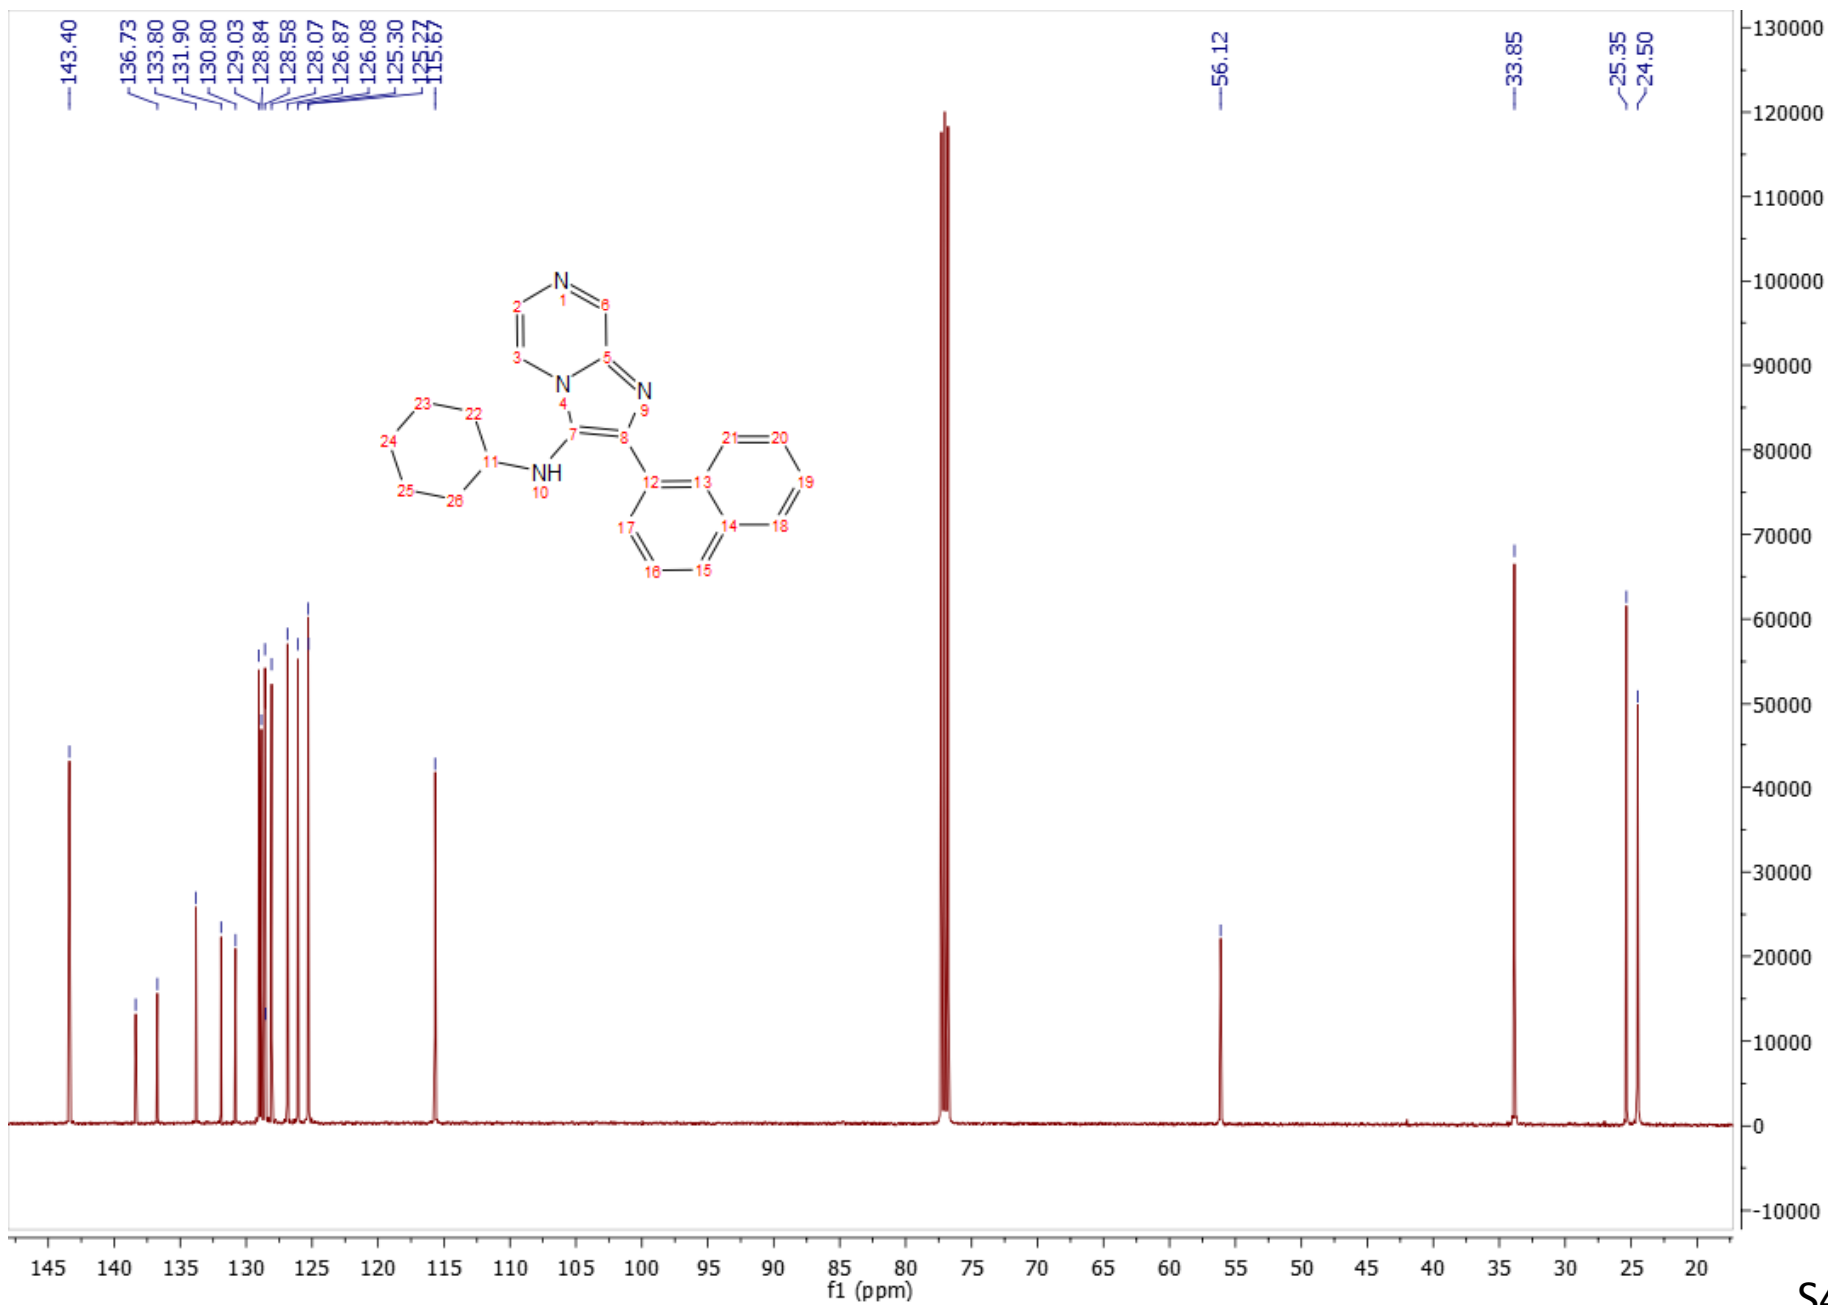

## 2f LC-MS

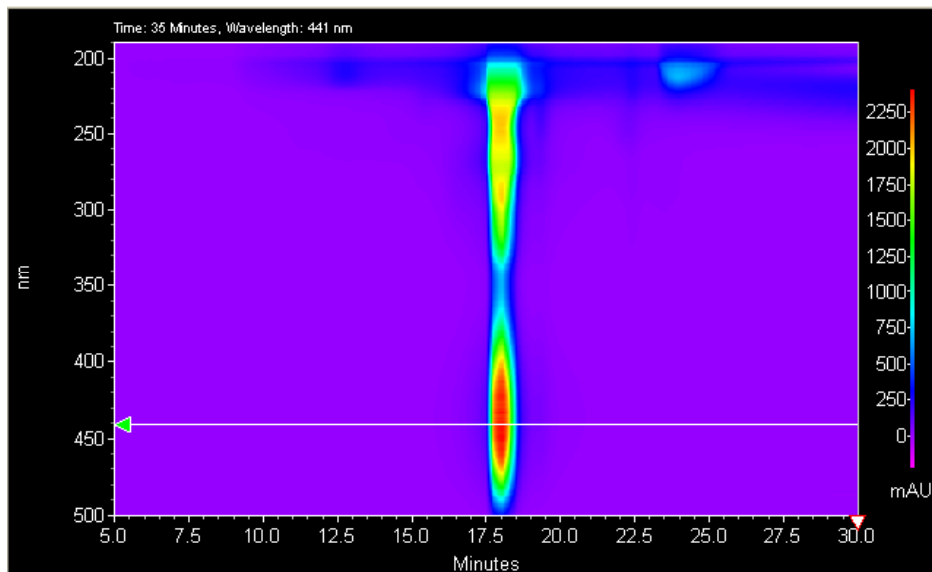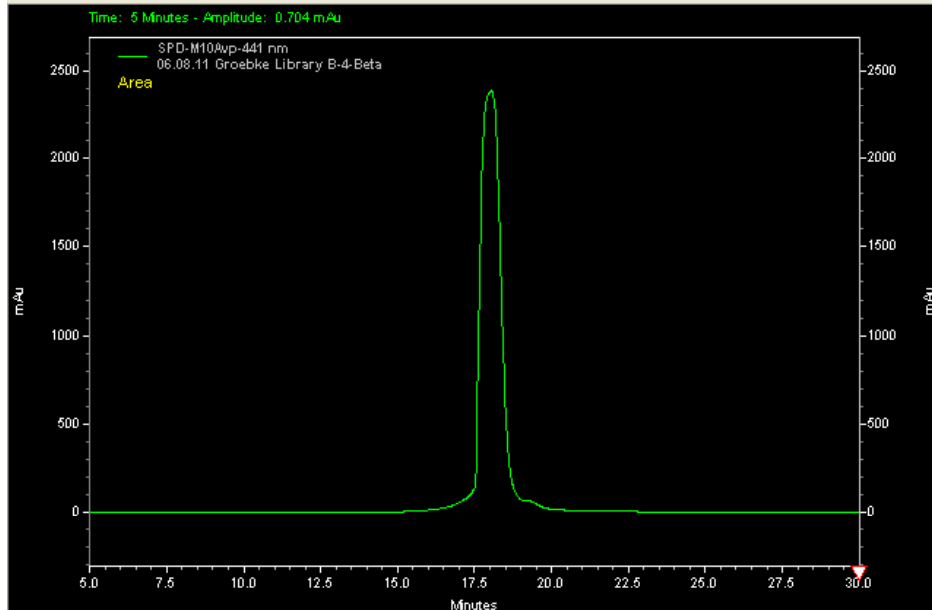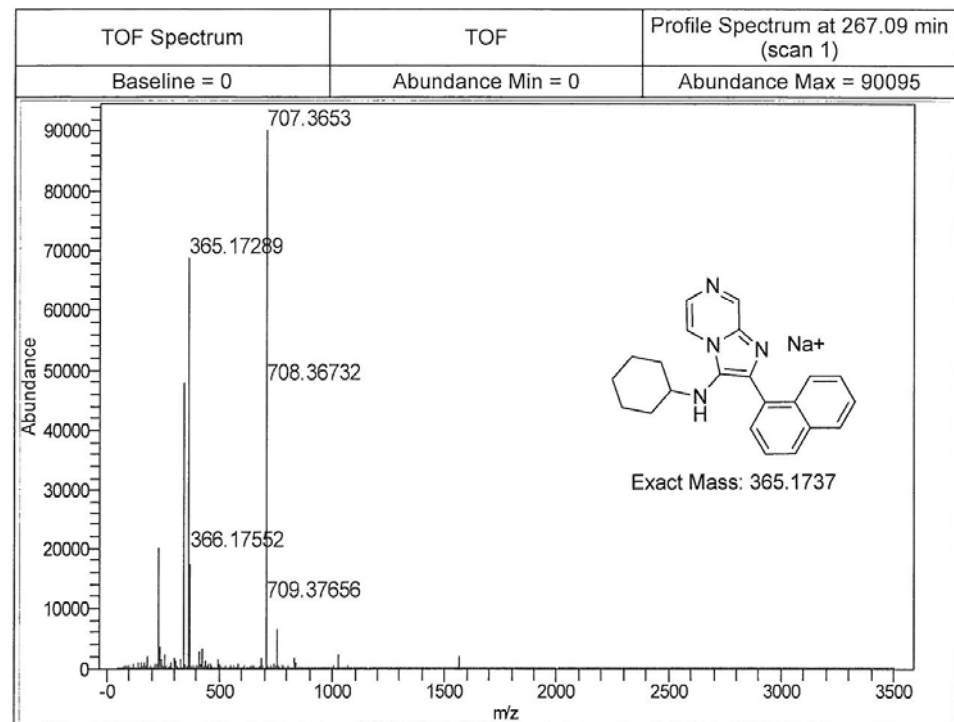

# 2g <sup>1</sup>H Spectrum

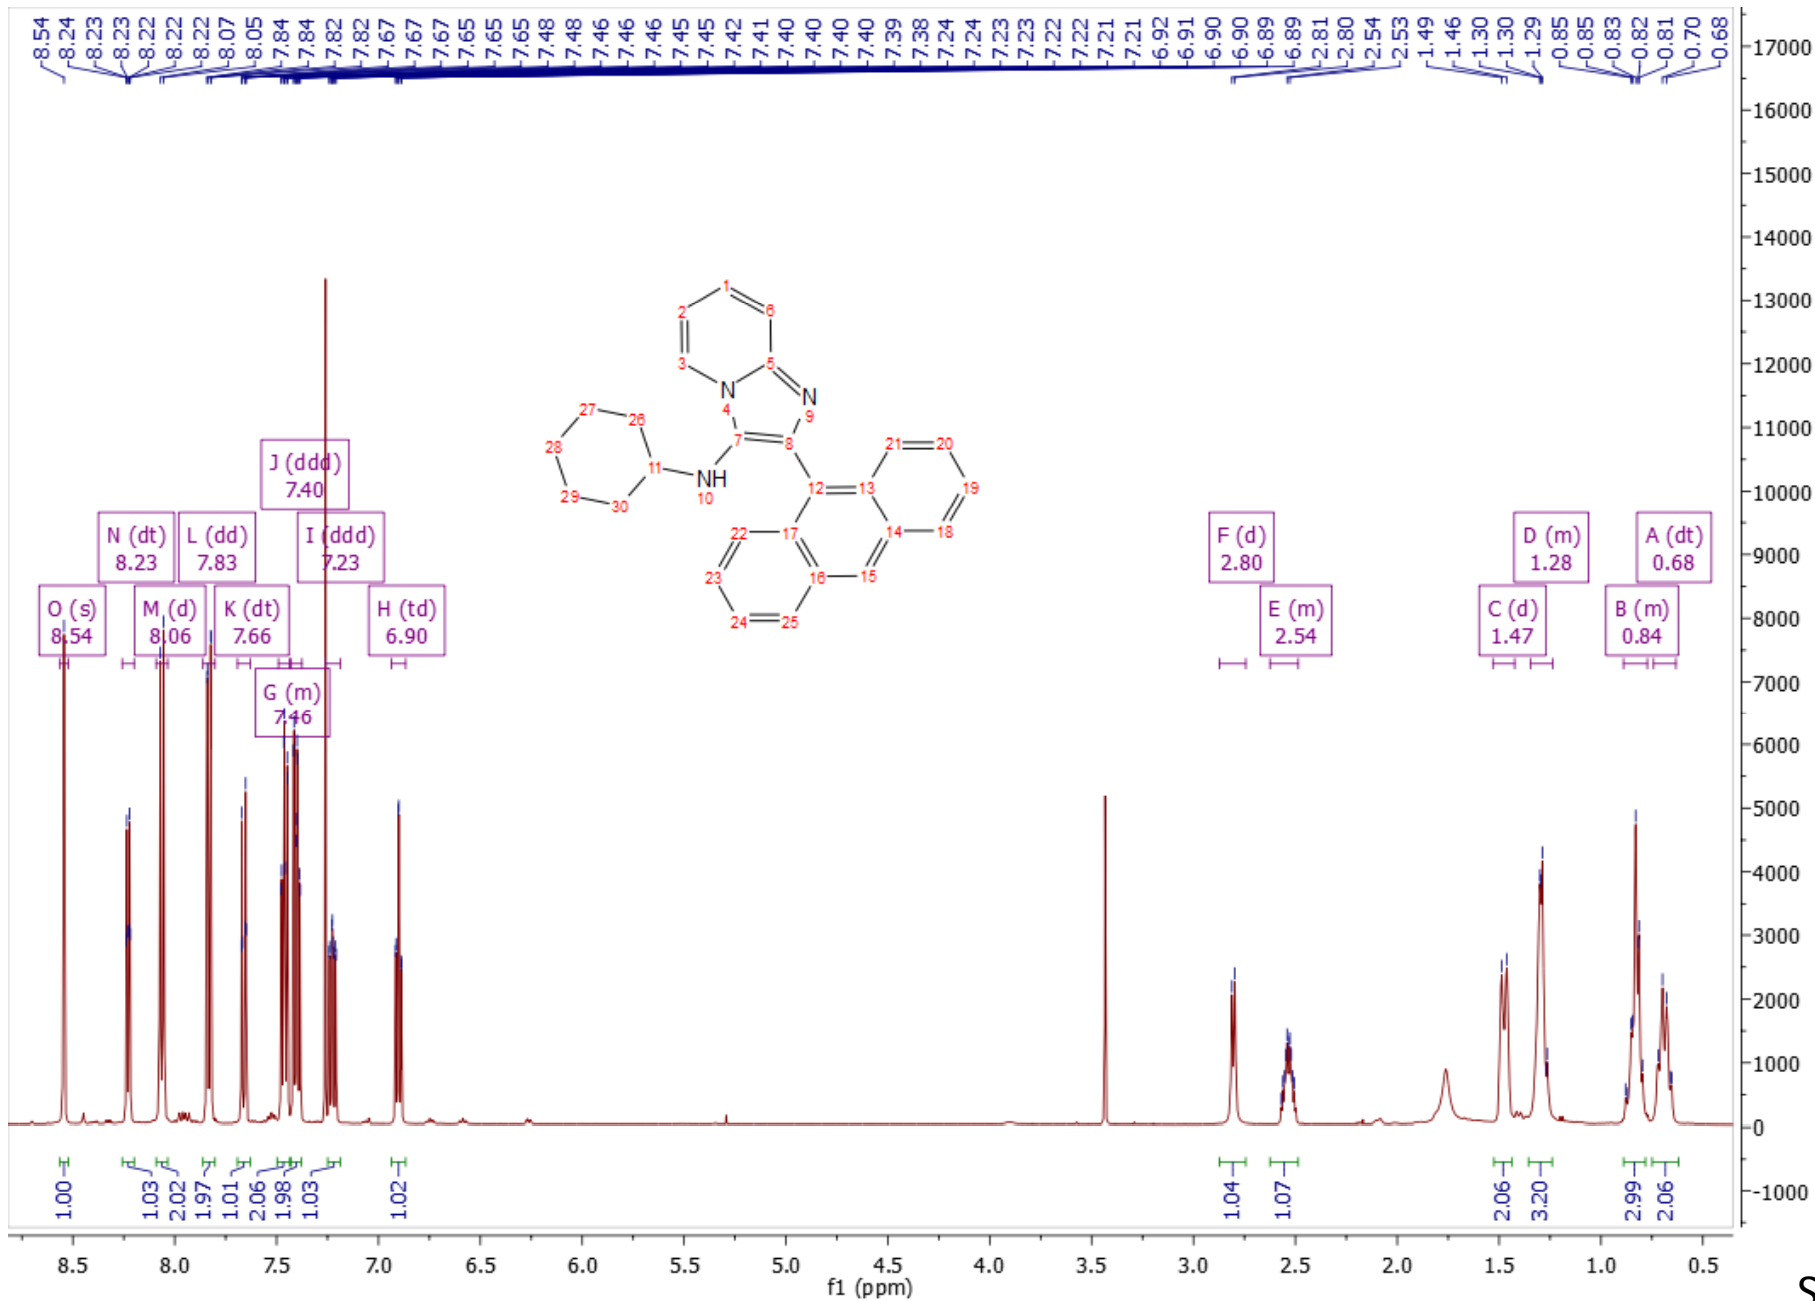

# 2g <sup>13</sup>C Spectrum

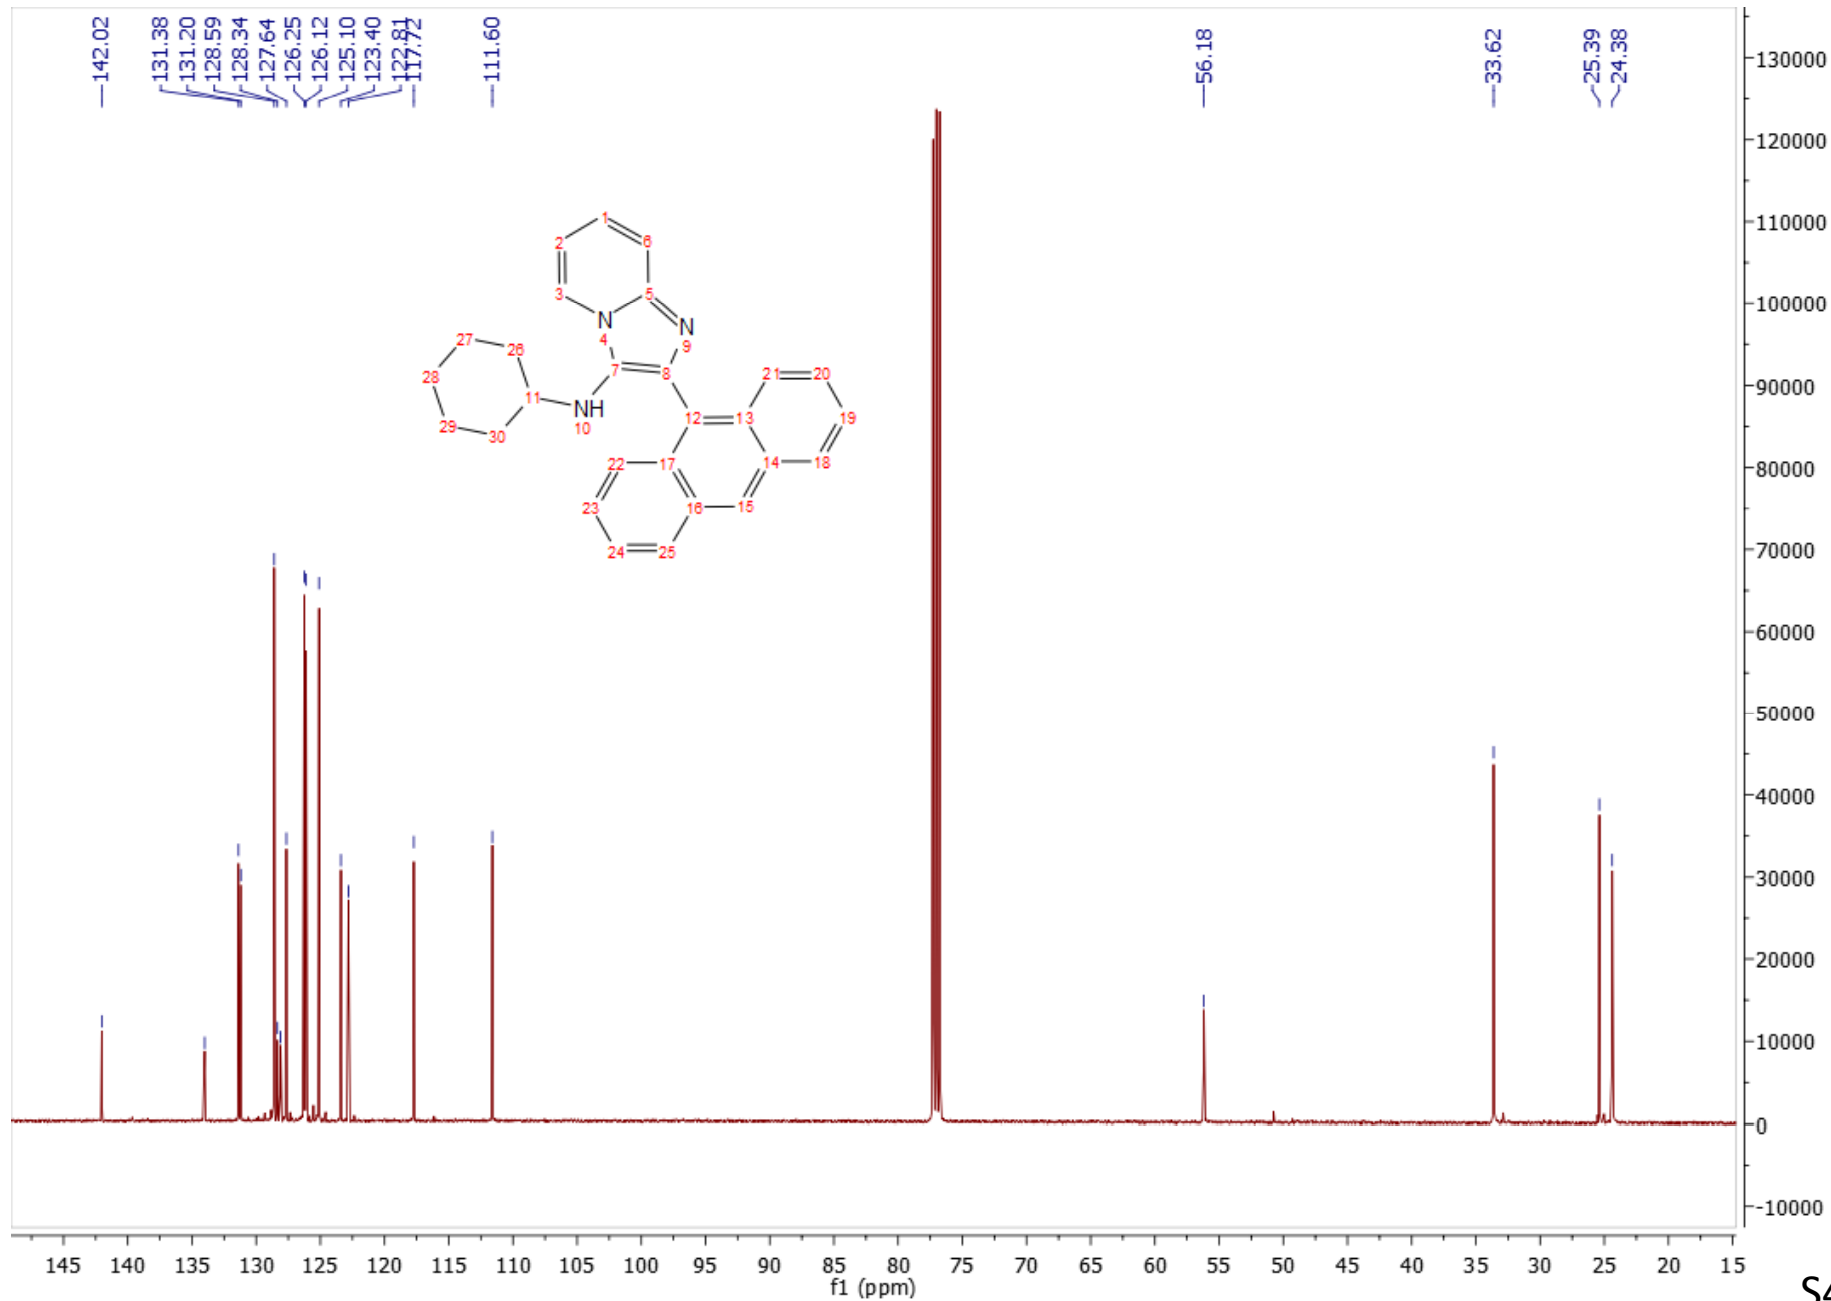

# 2g MS

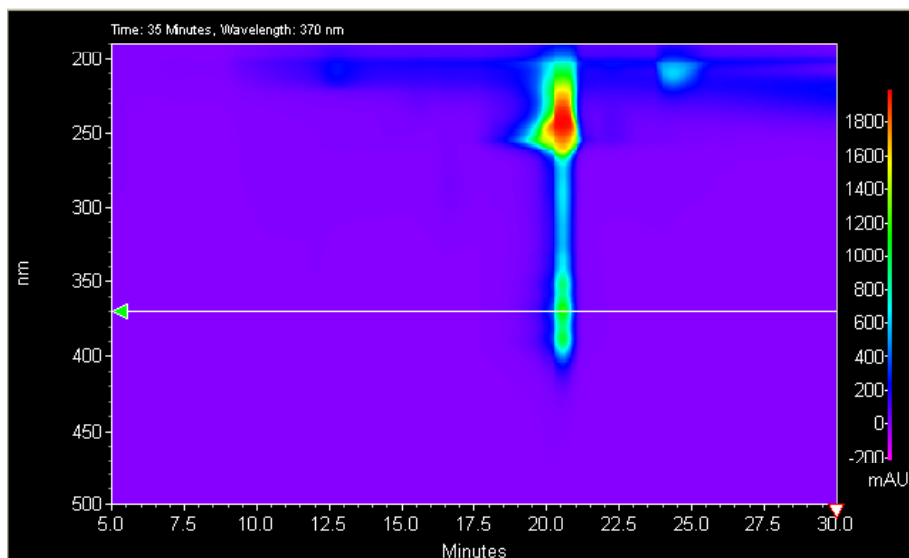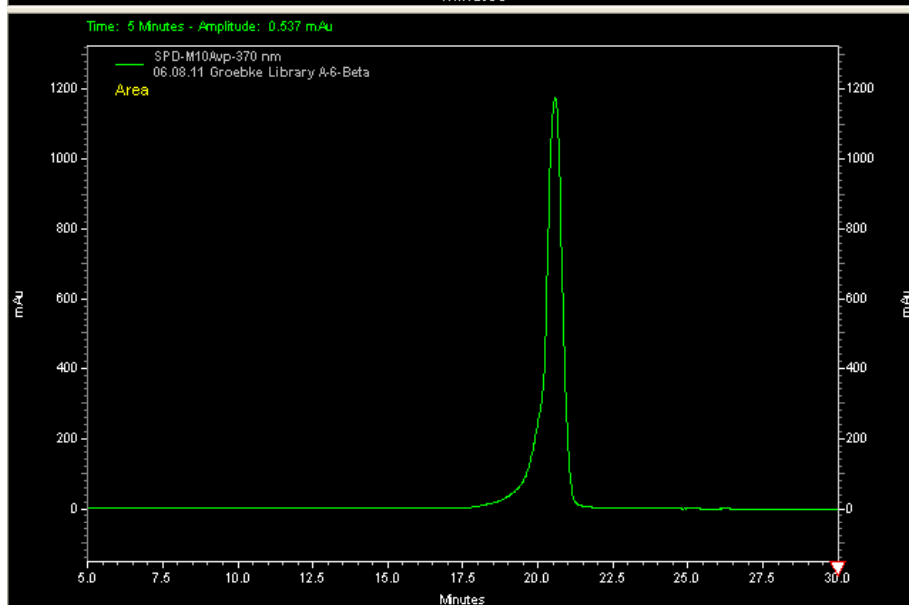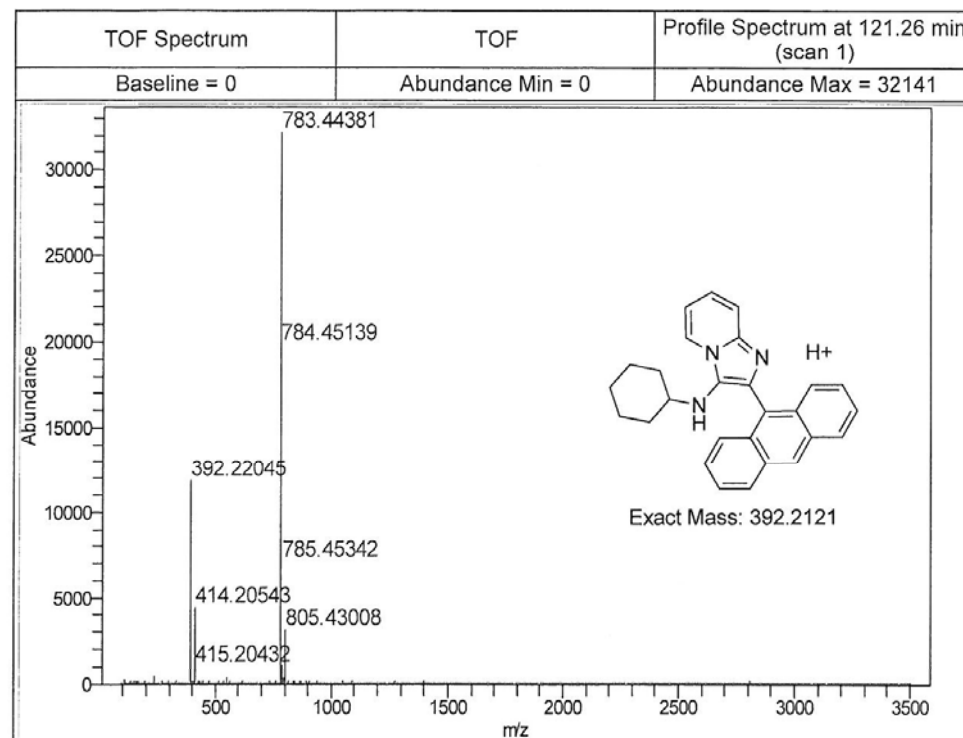

# 2h <sup>1</sup>H Spectrum

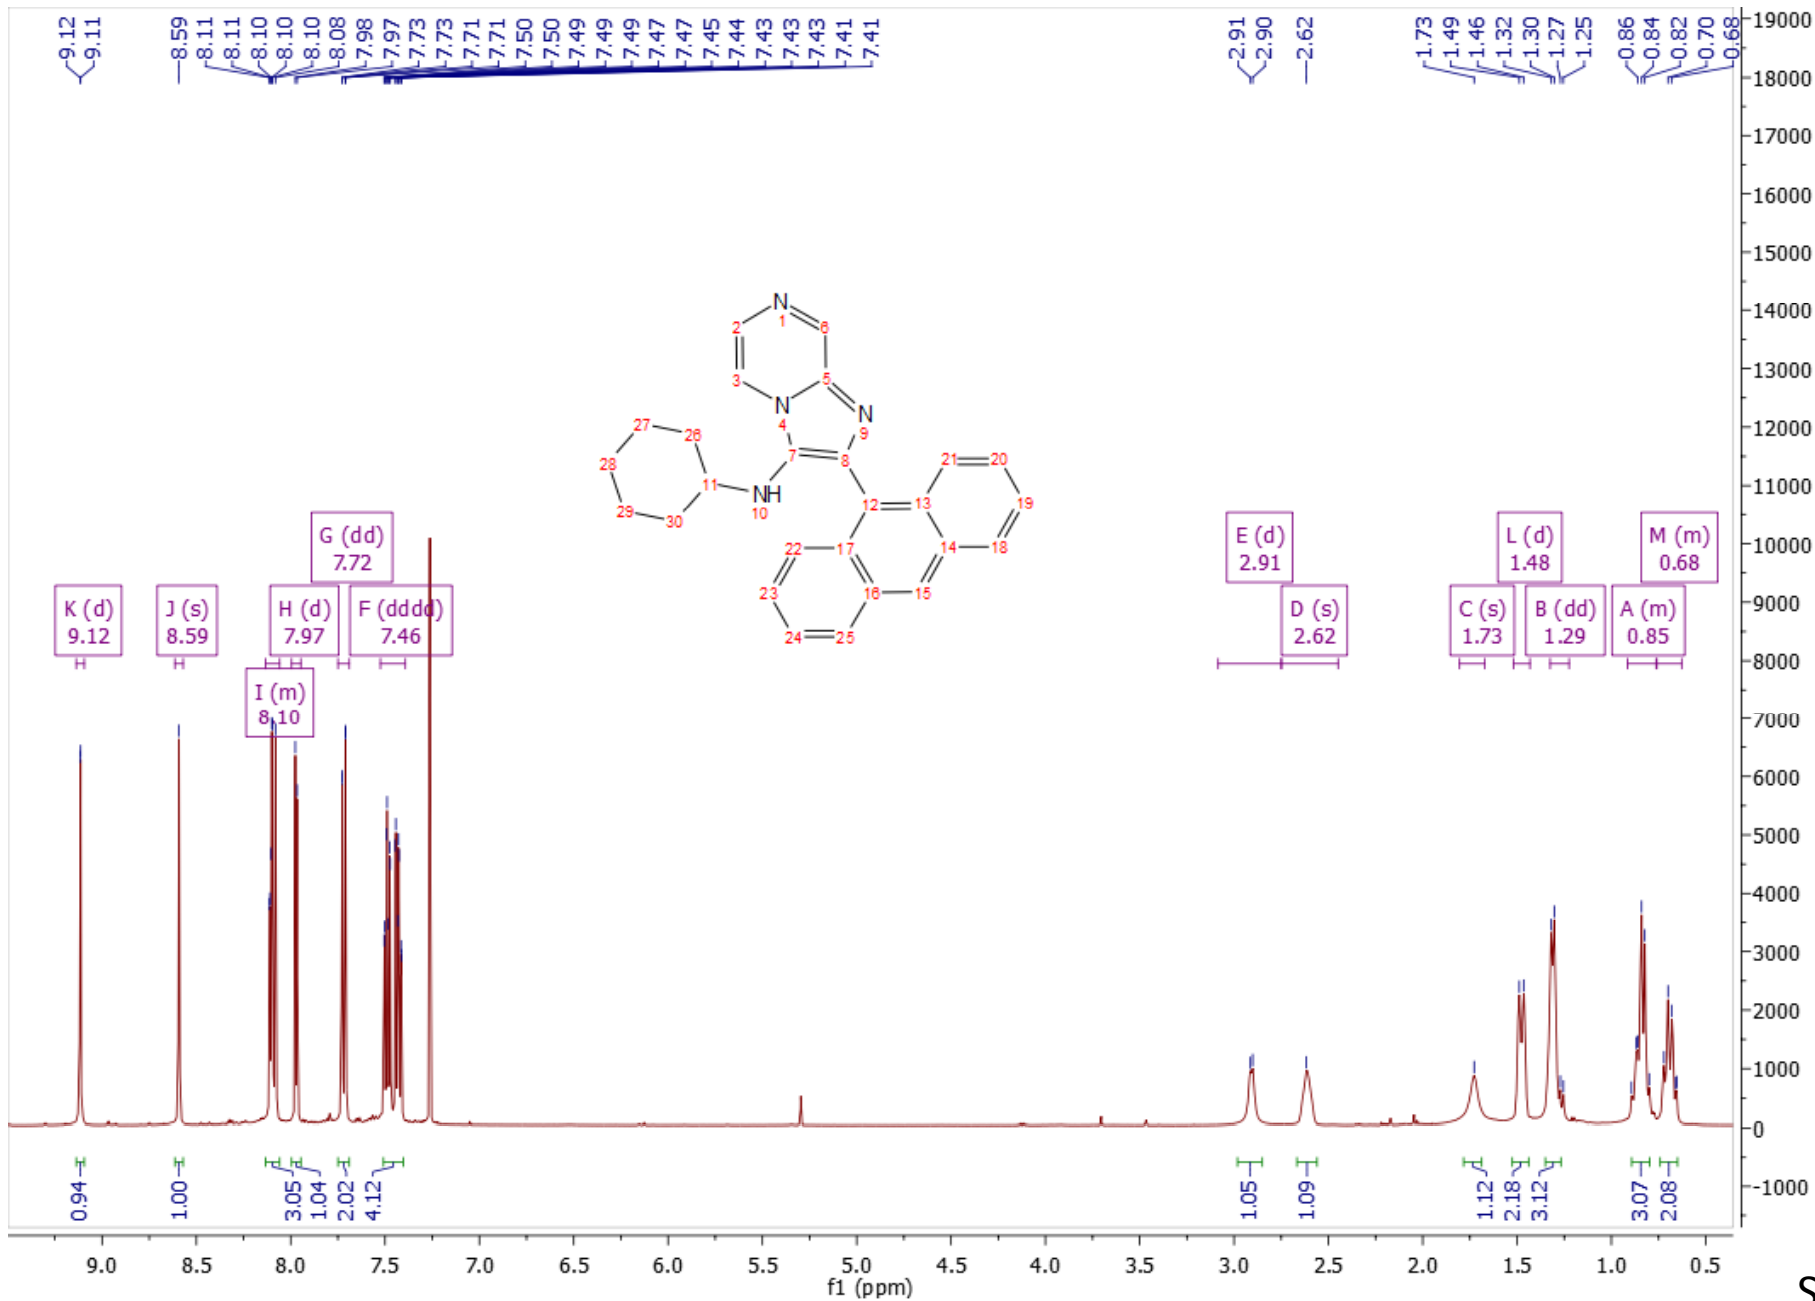

## 2h <sup>13</sup>C Spectrum

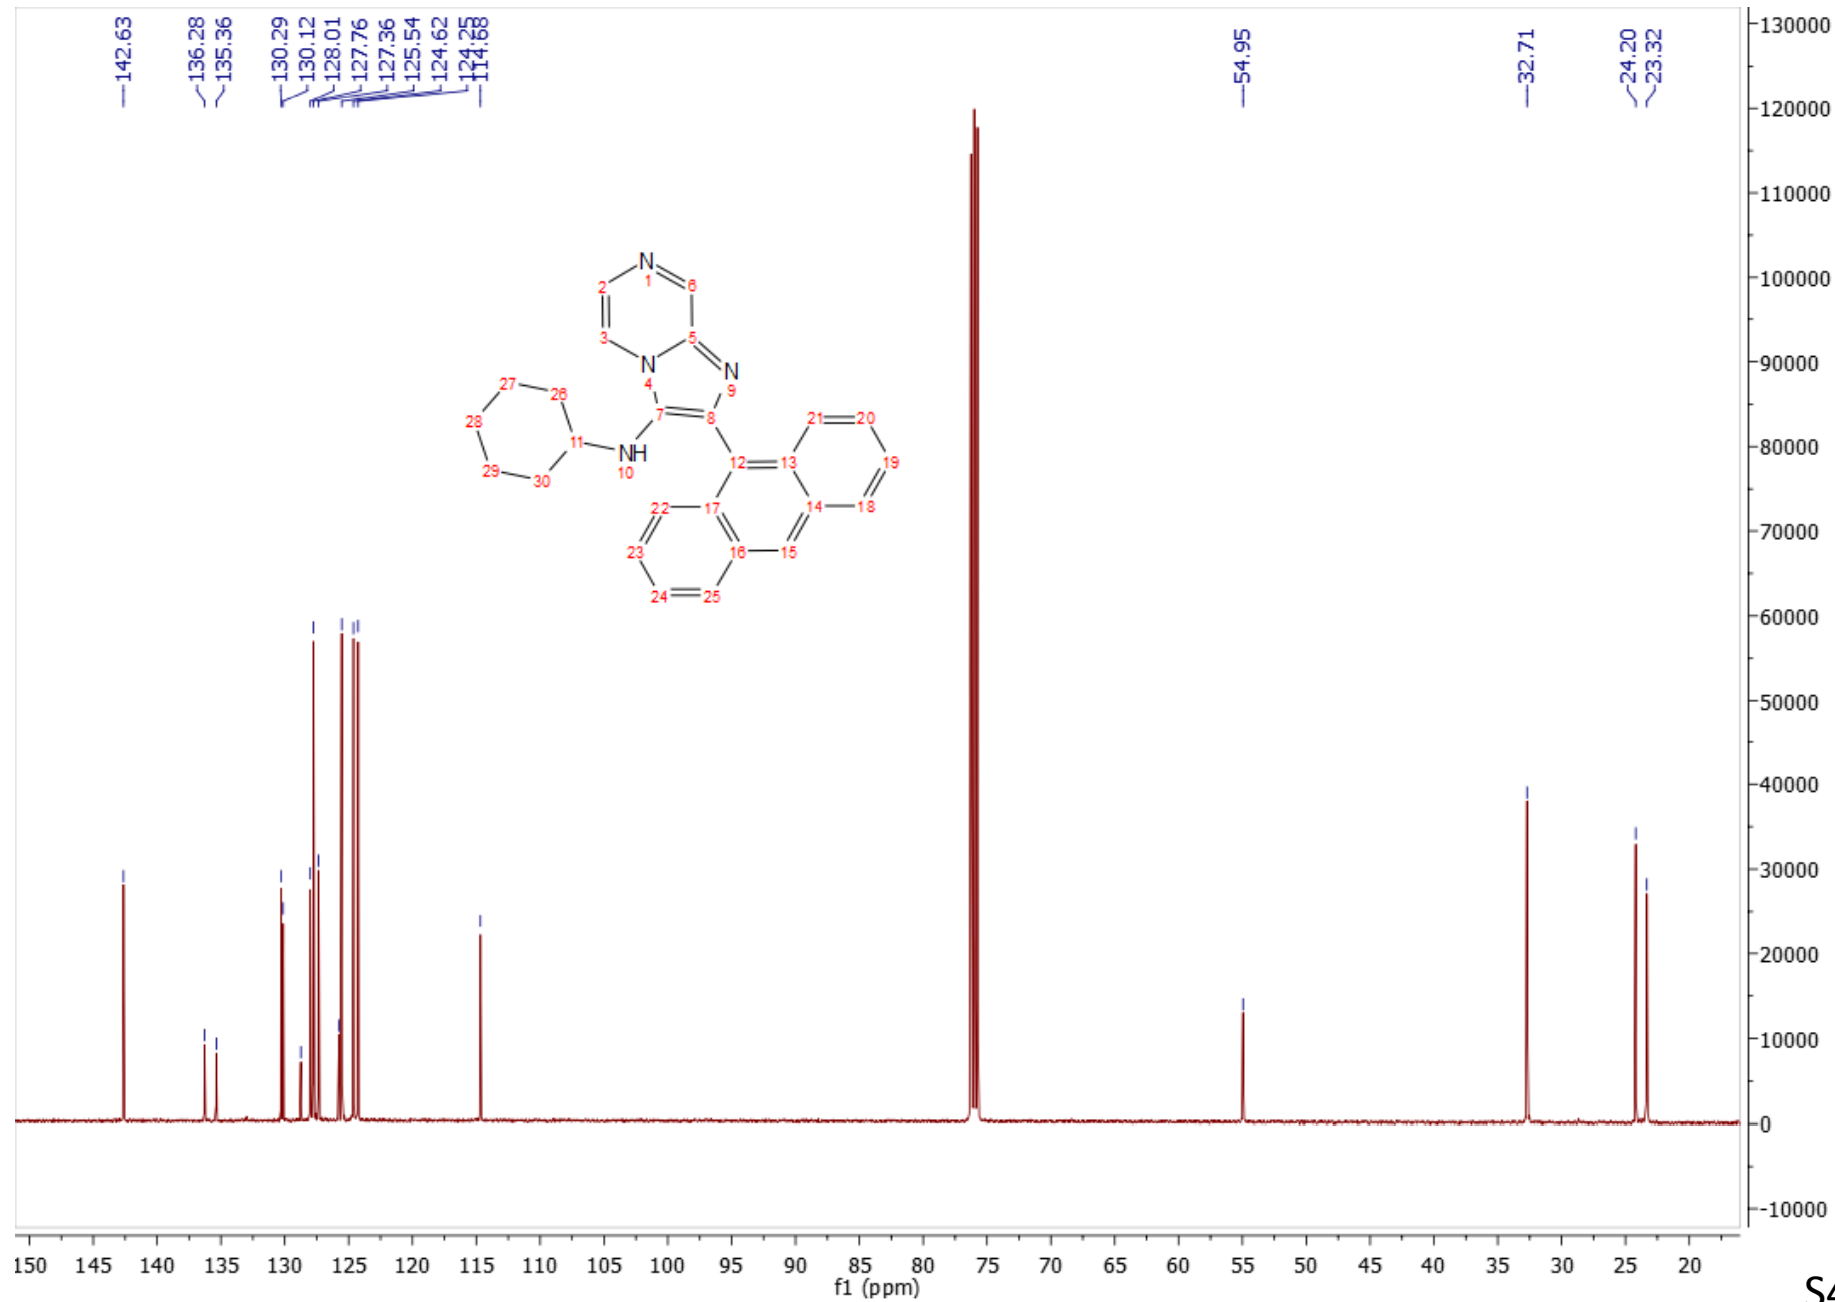



## 2h LC-MS

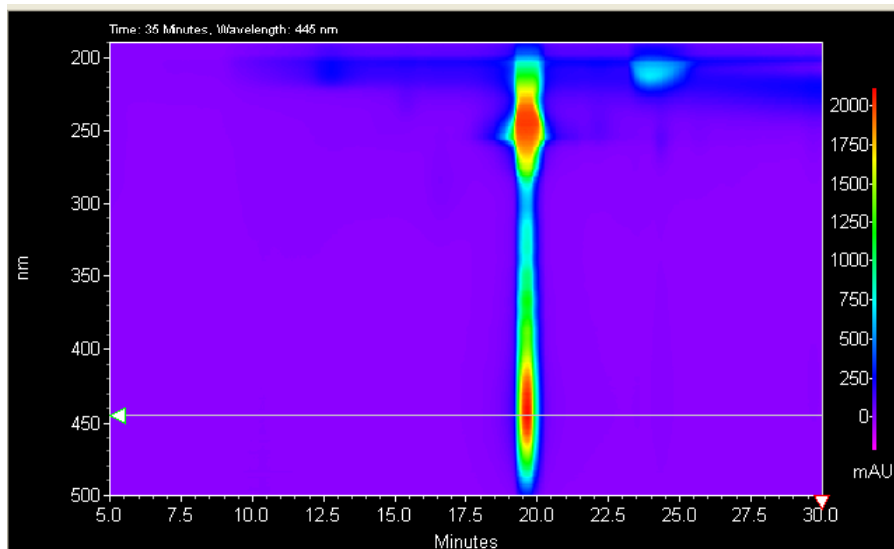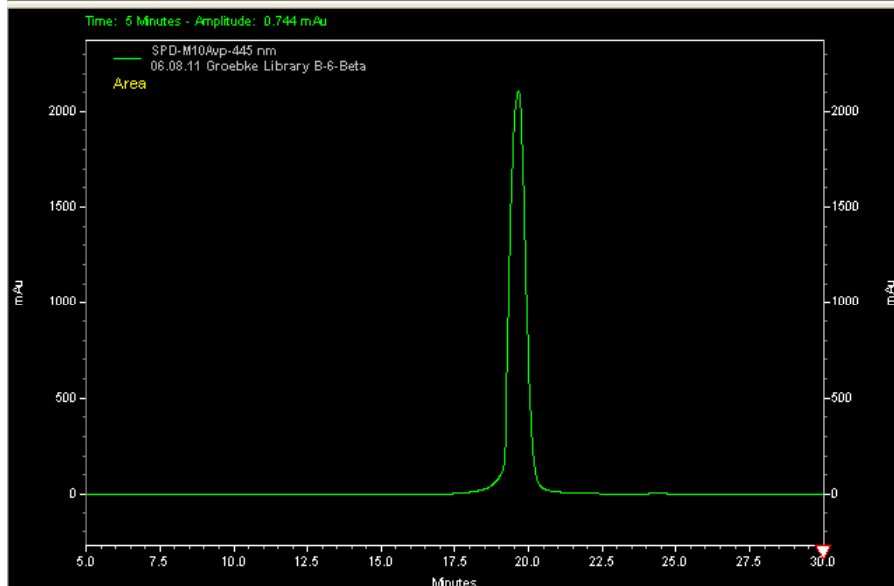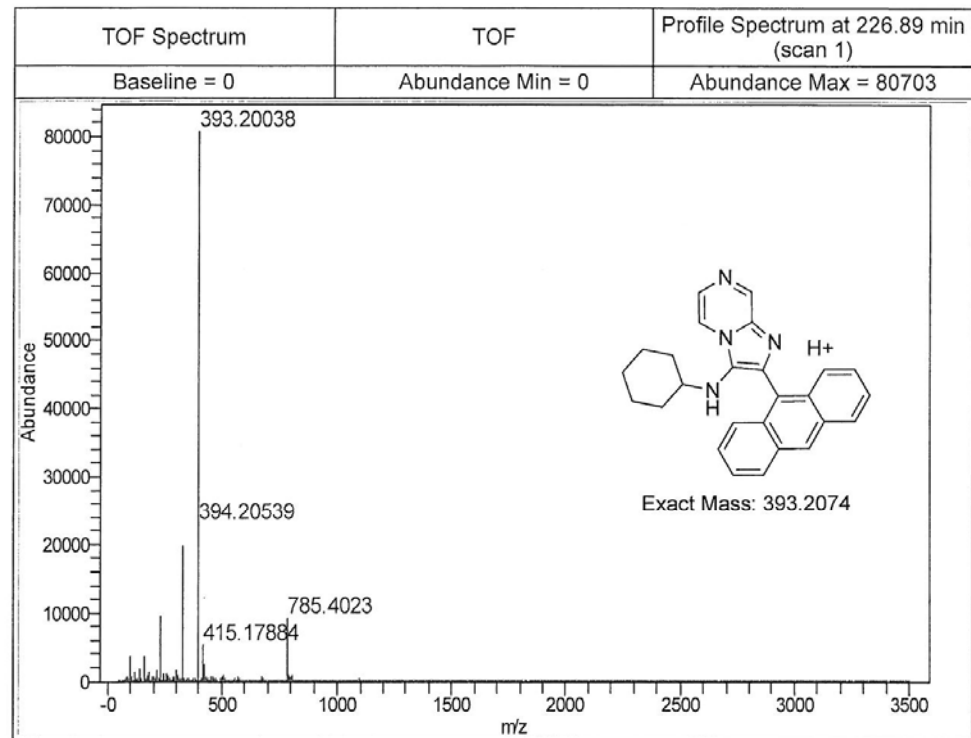

### 3a <sup>1</sup>H Spectrum

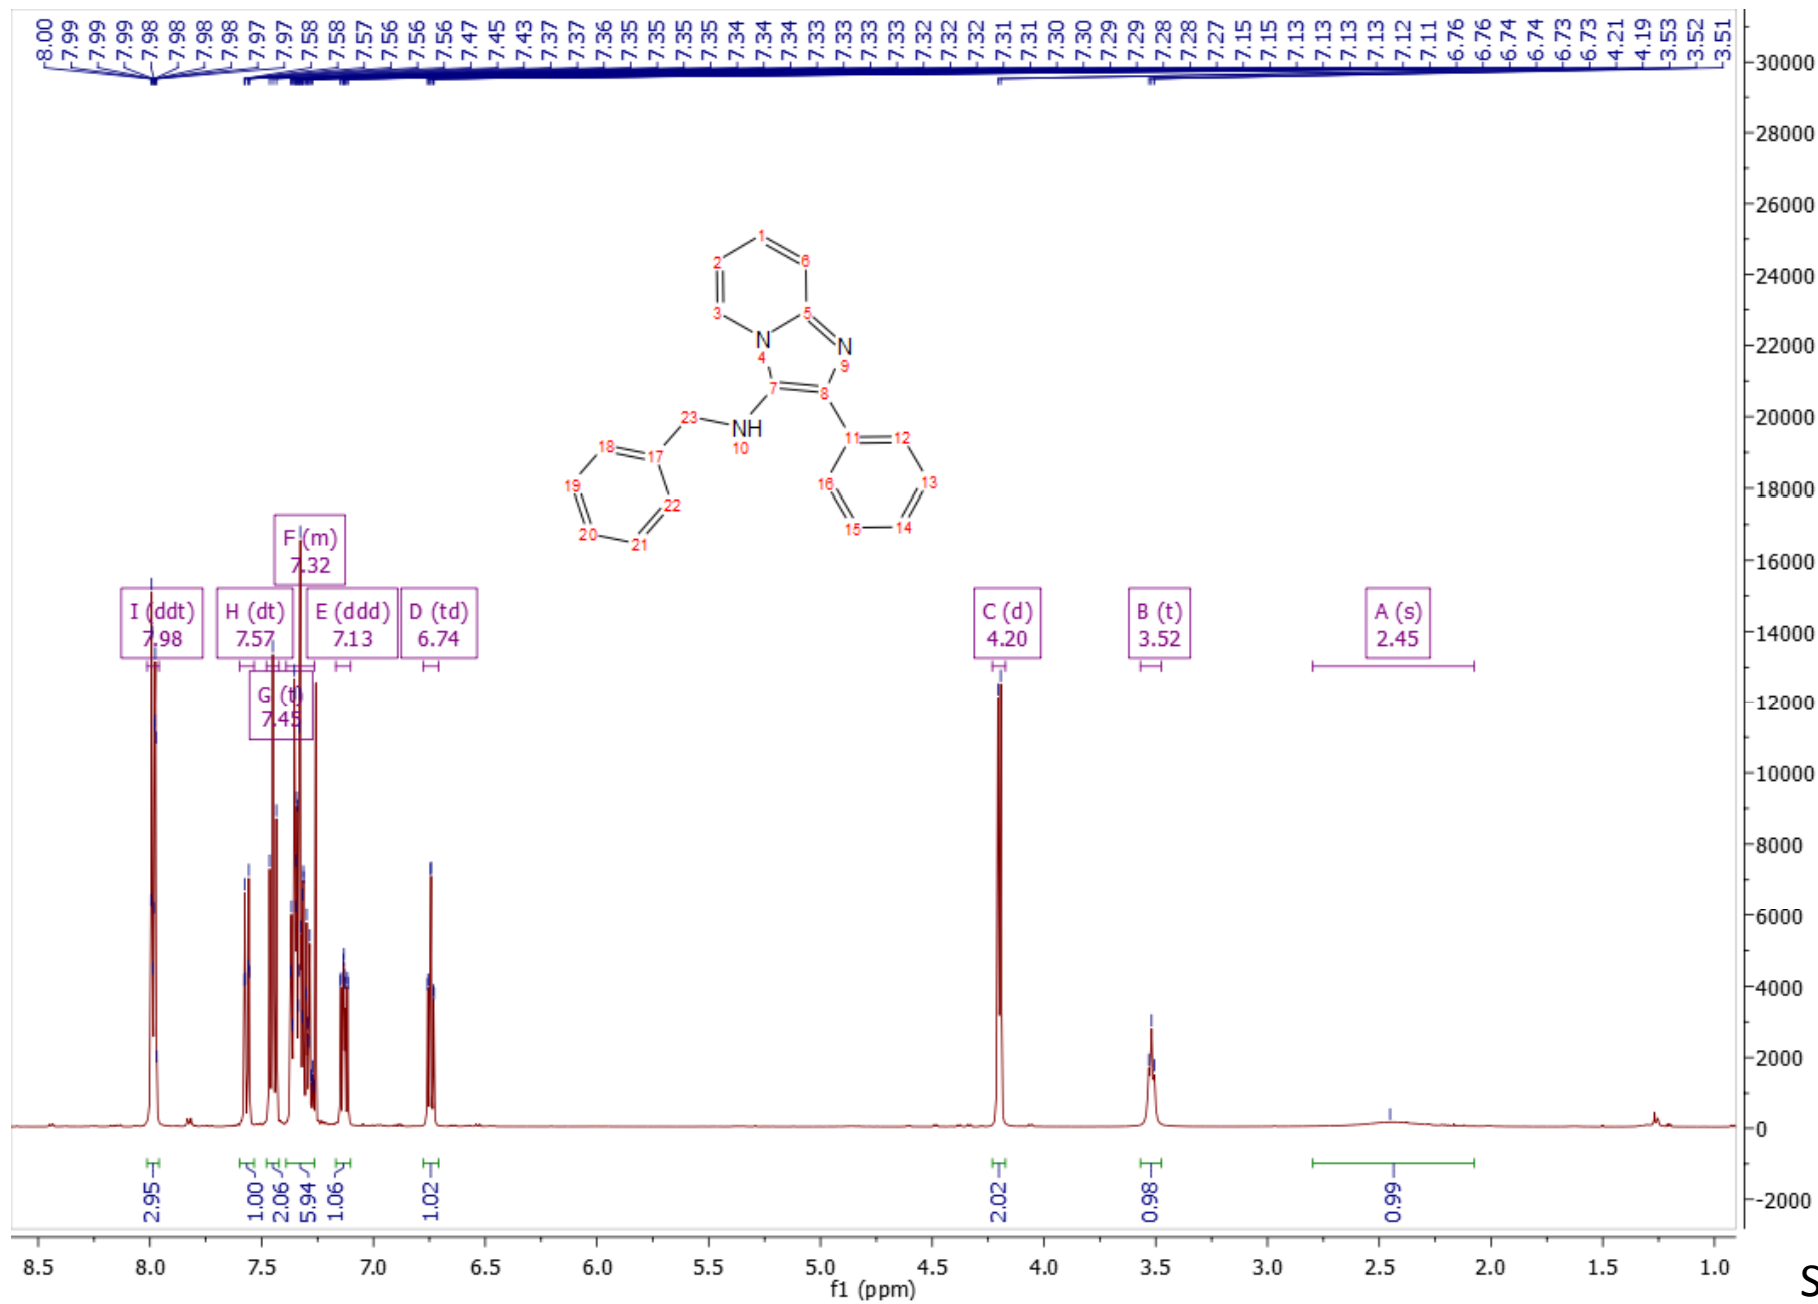

### 3a <sup>13</sup>C Spectrum

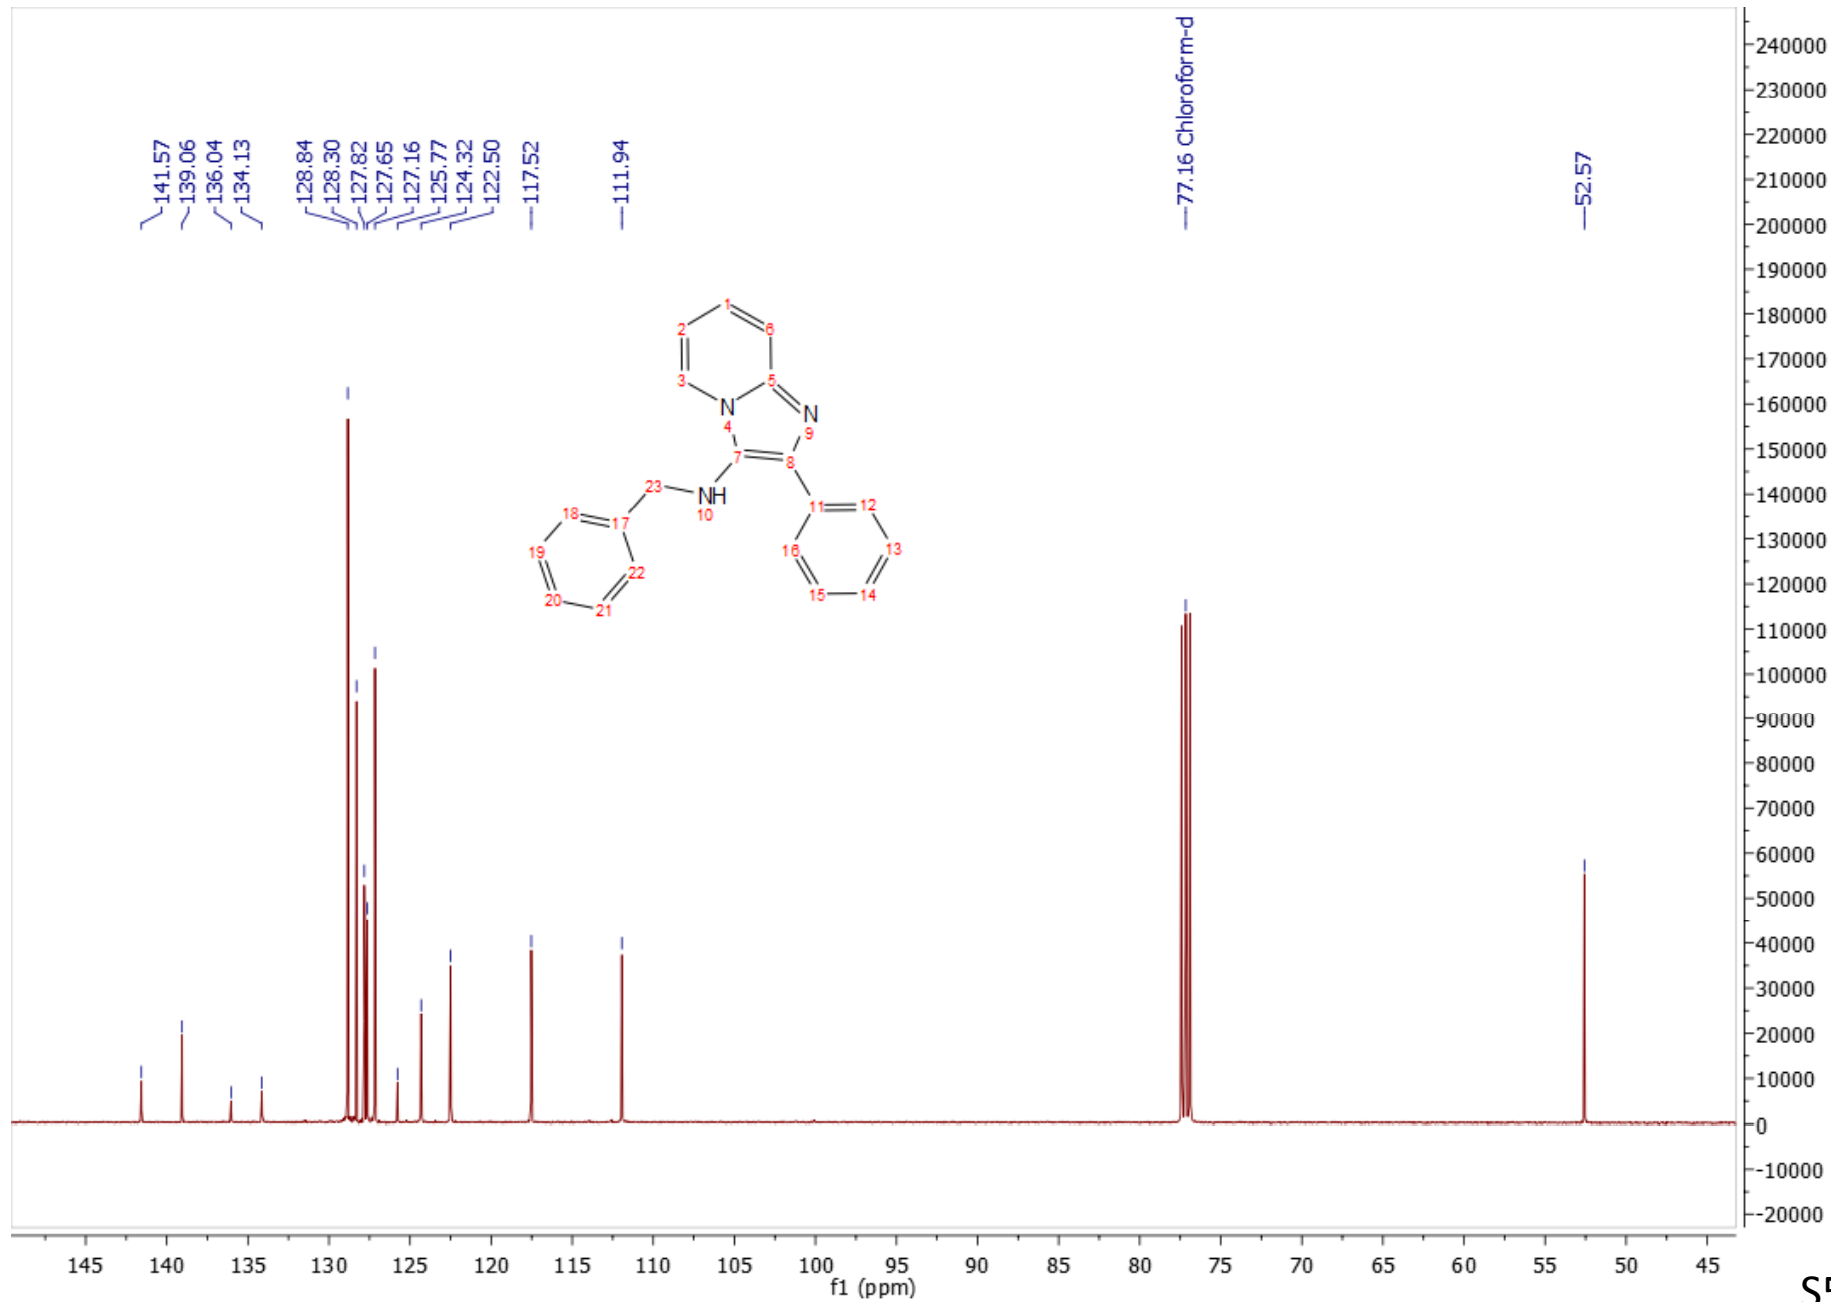

### 3a LC-MS

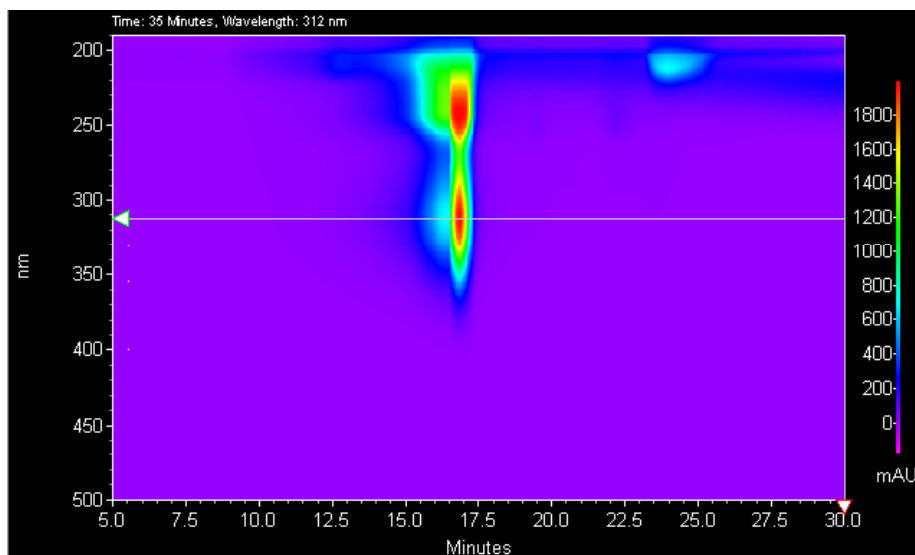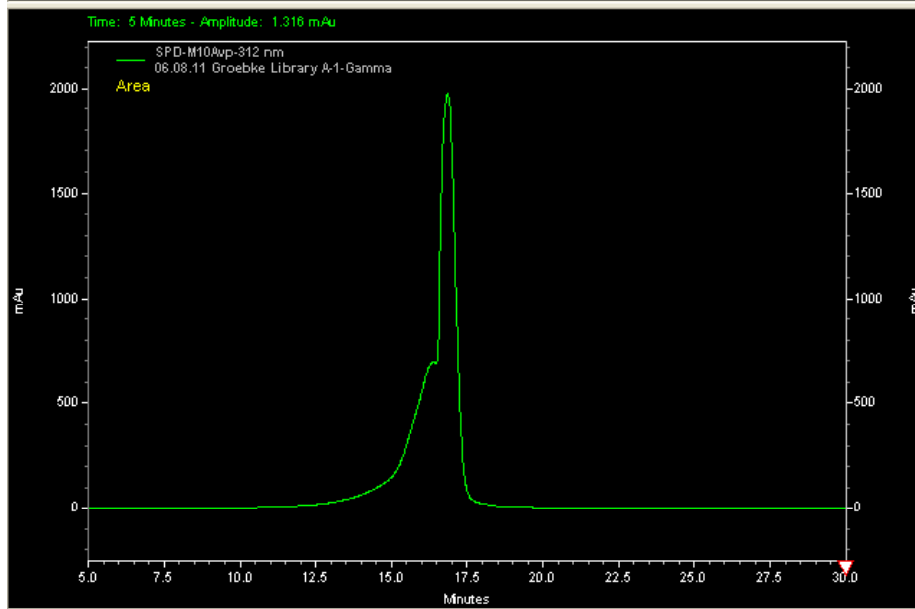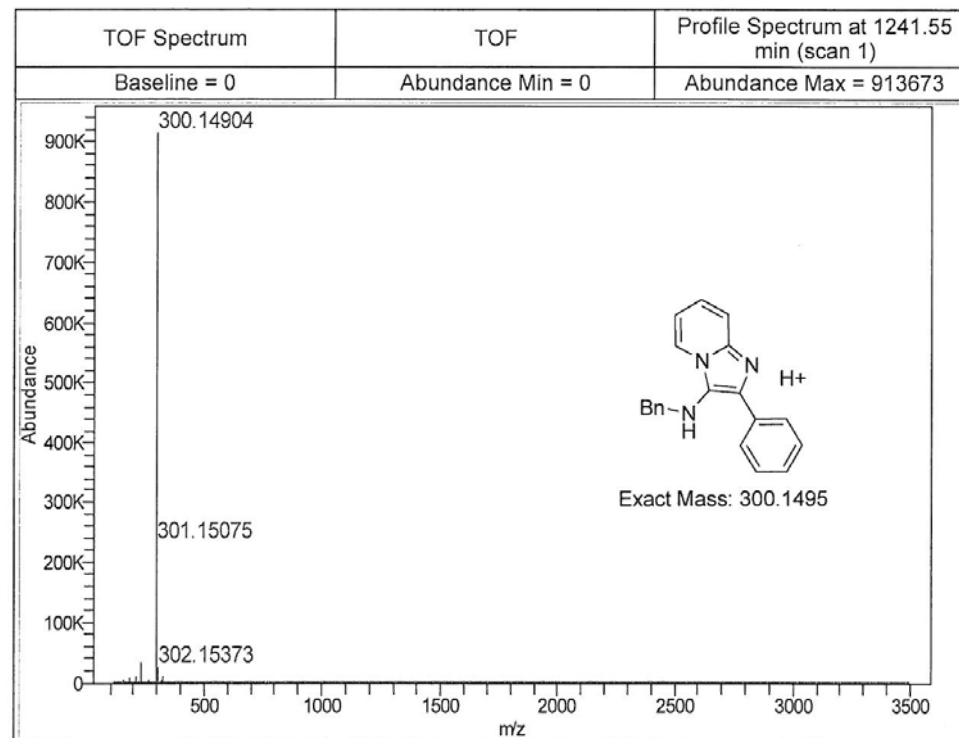

### 3b <sup>1</sup>H Spectrum

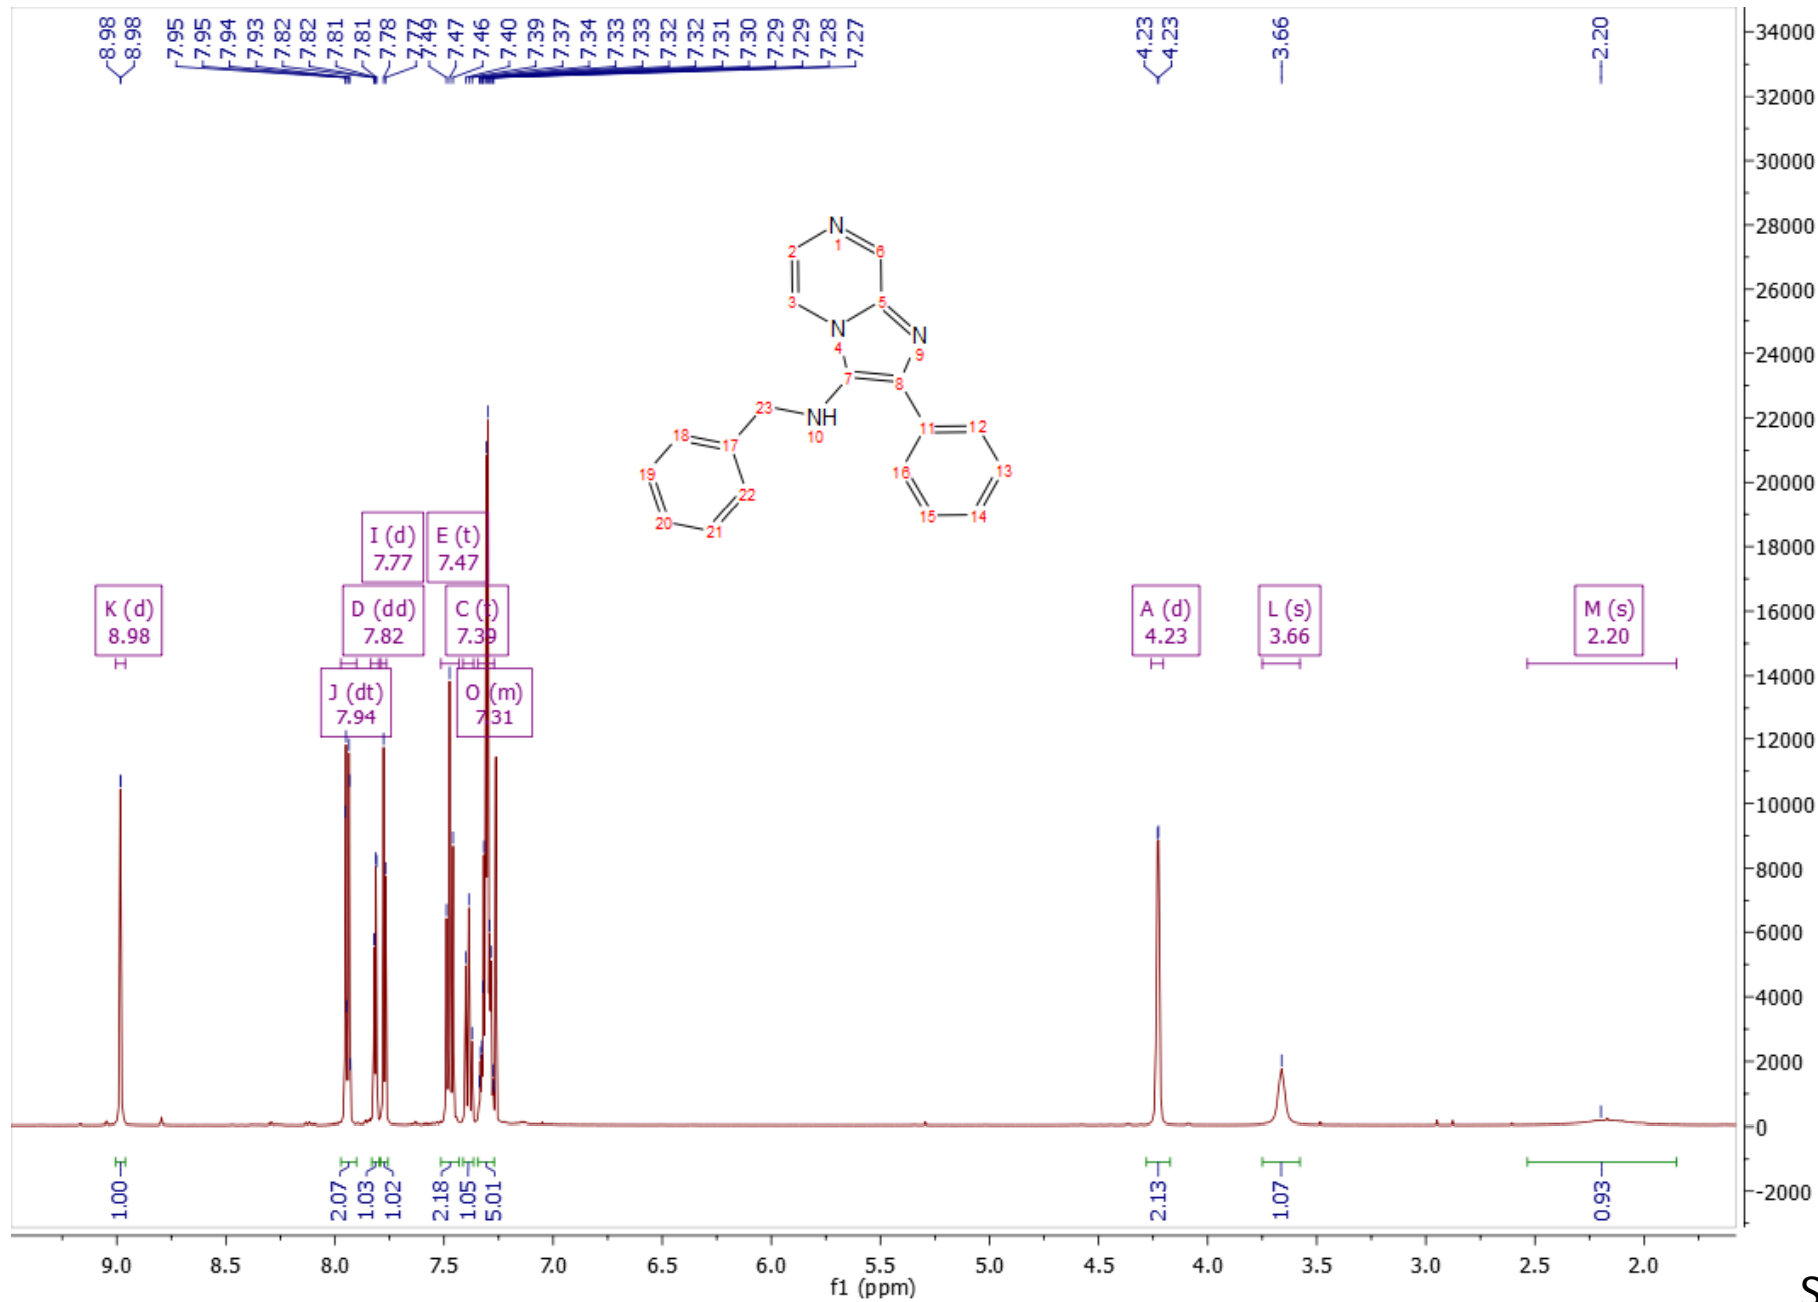

### 3b <sup>13</sup>C Spectrum

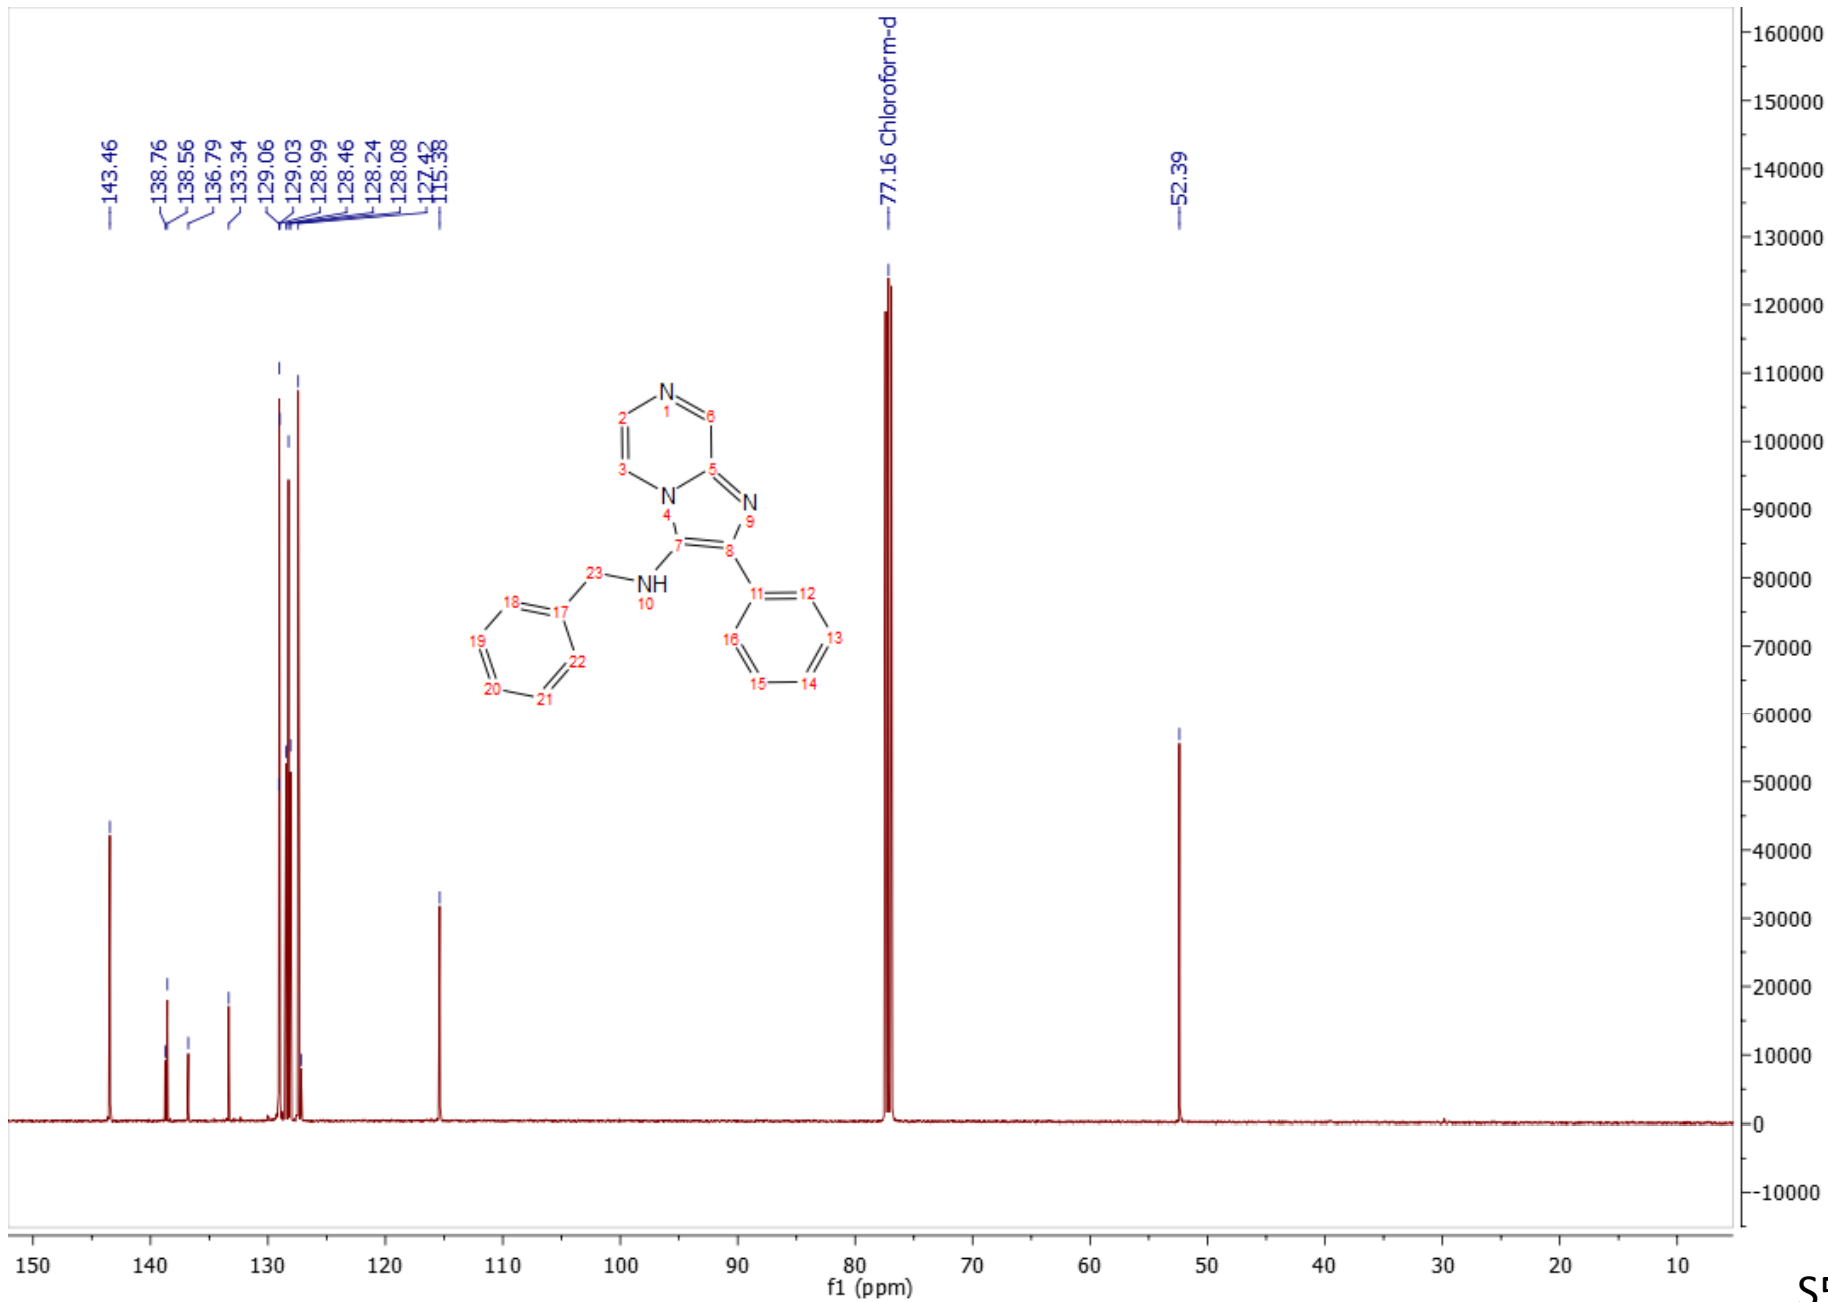

### 3b LC-MS

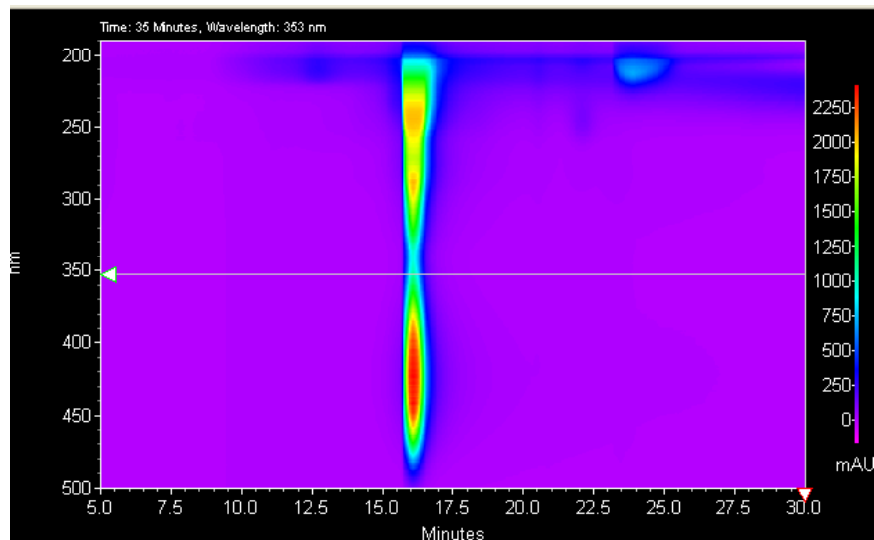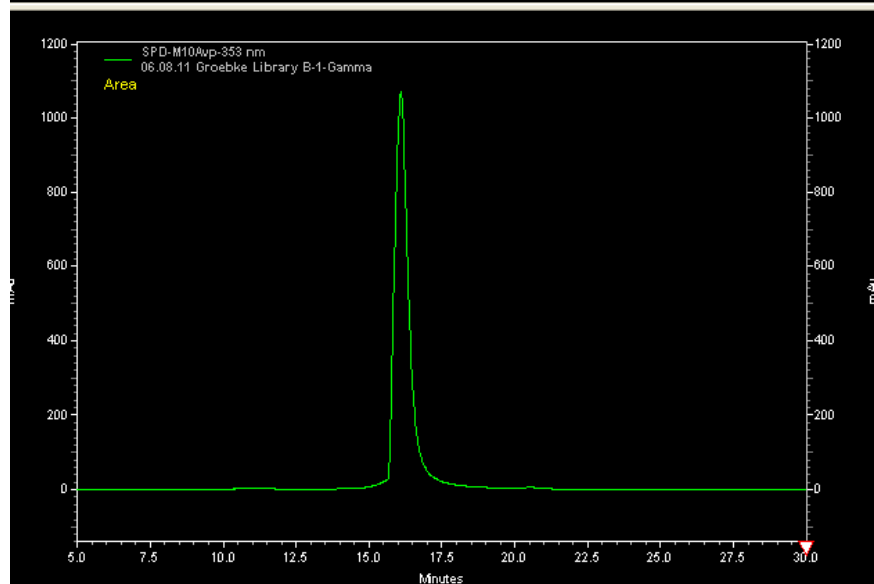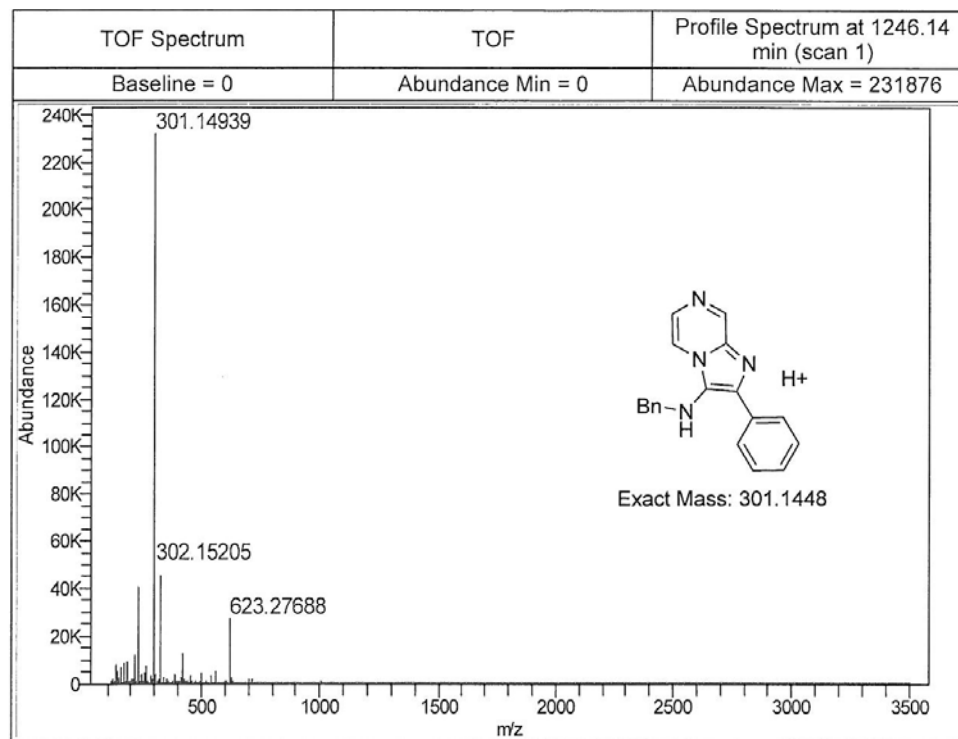

### 3c <sup>1</sup>H Spectrum

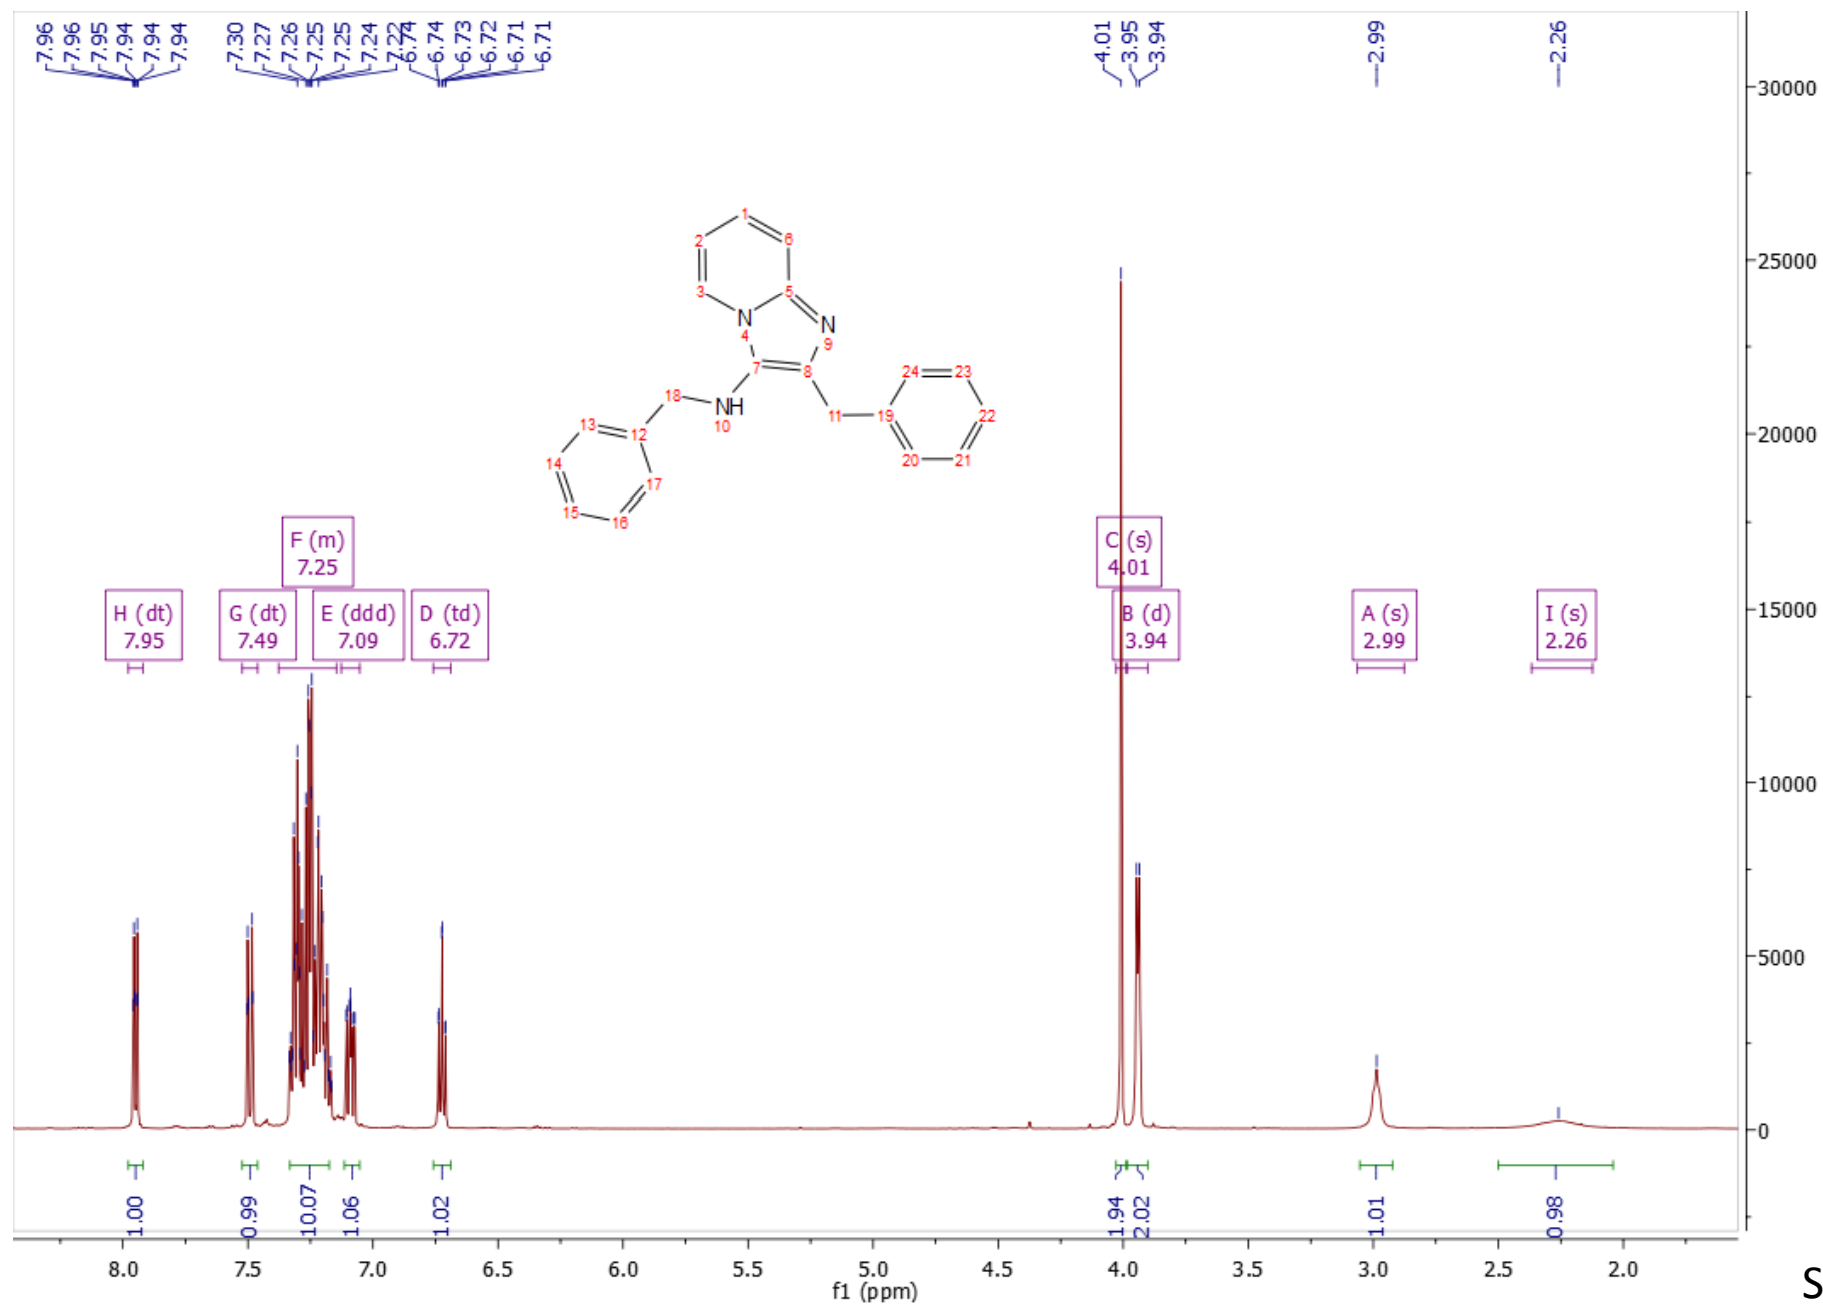



### 3c <sup>13</sup>C Spectrum

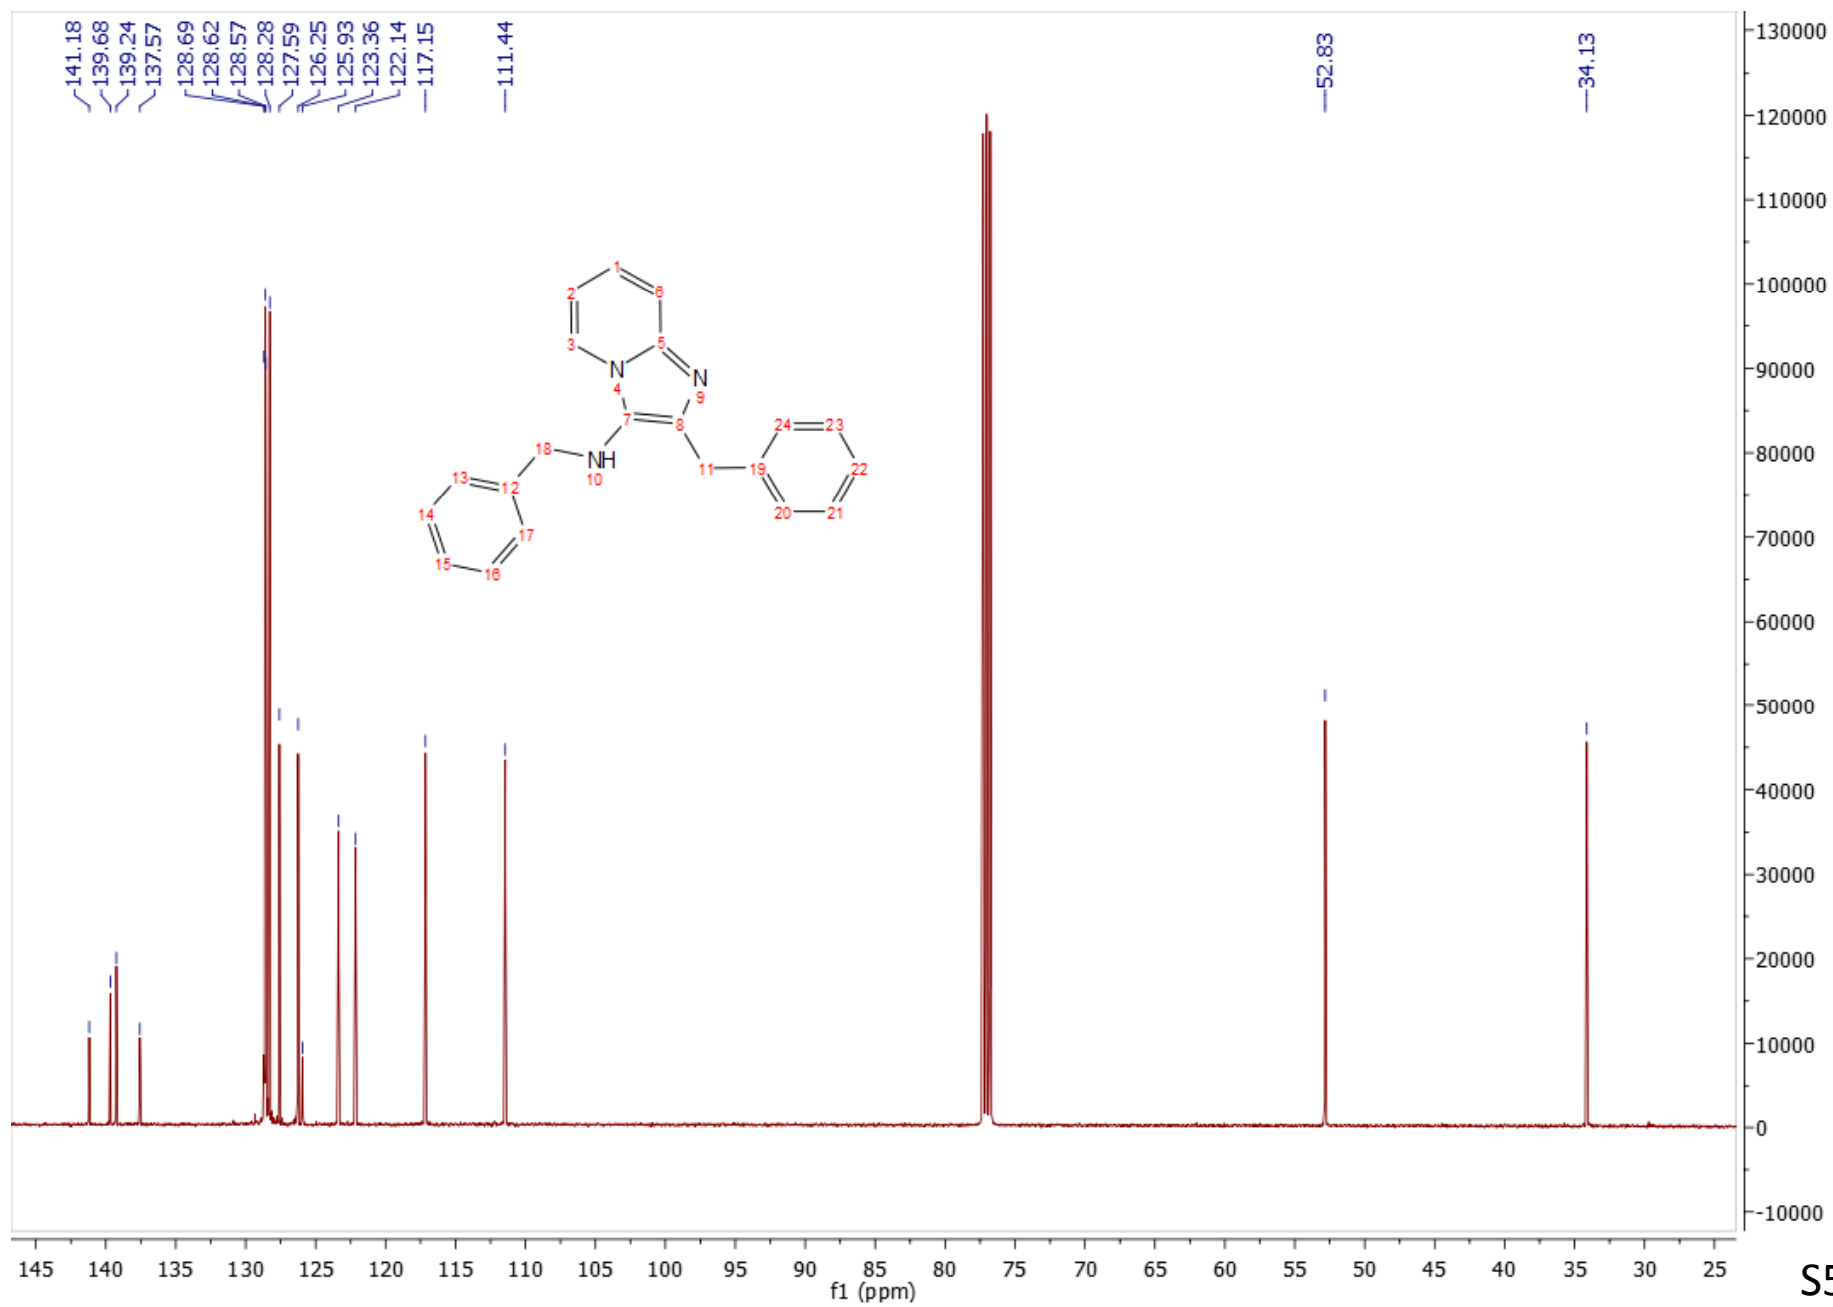

### 3c LC-MS

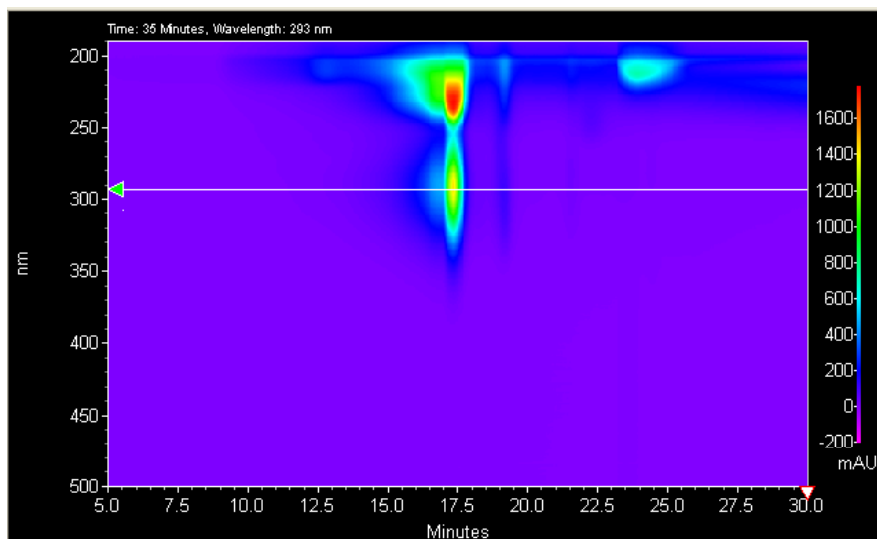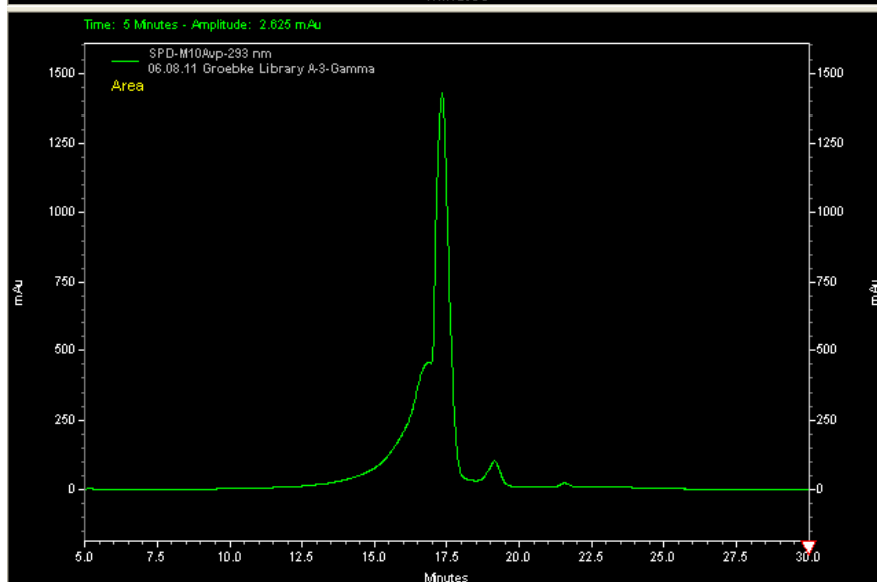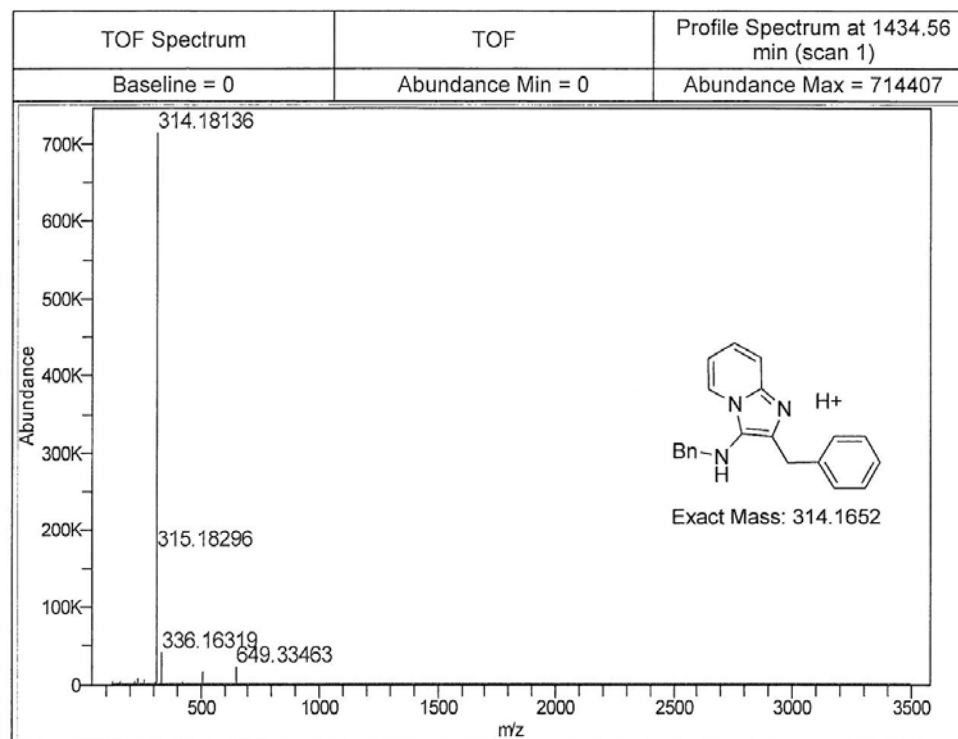

### 3d <sup>1</sup>H Spectrum

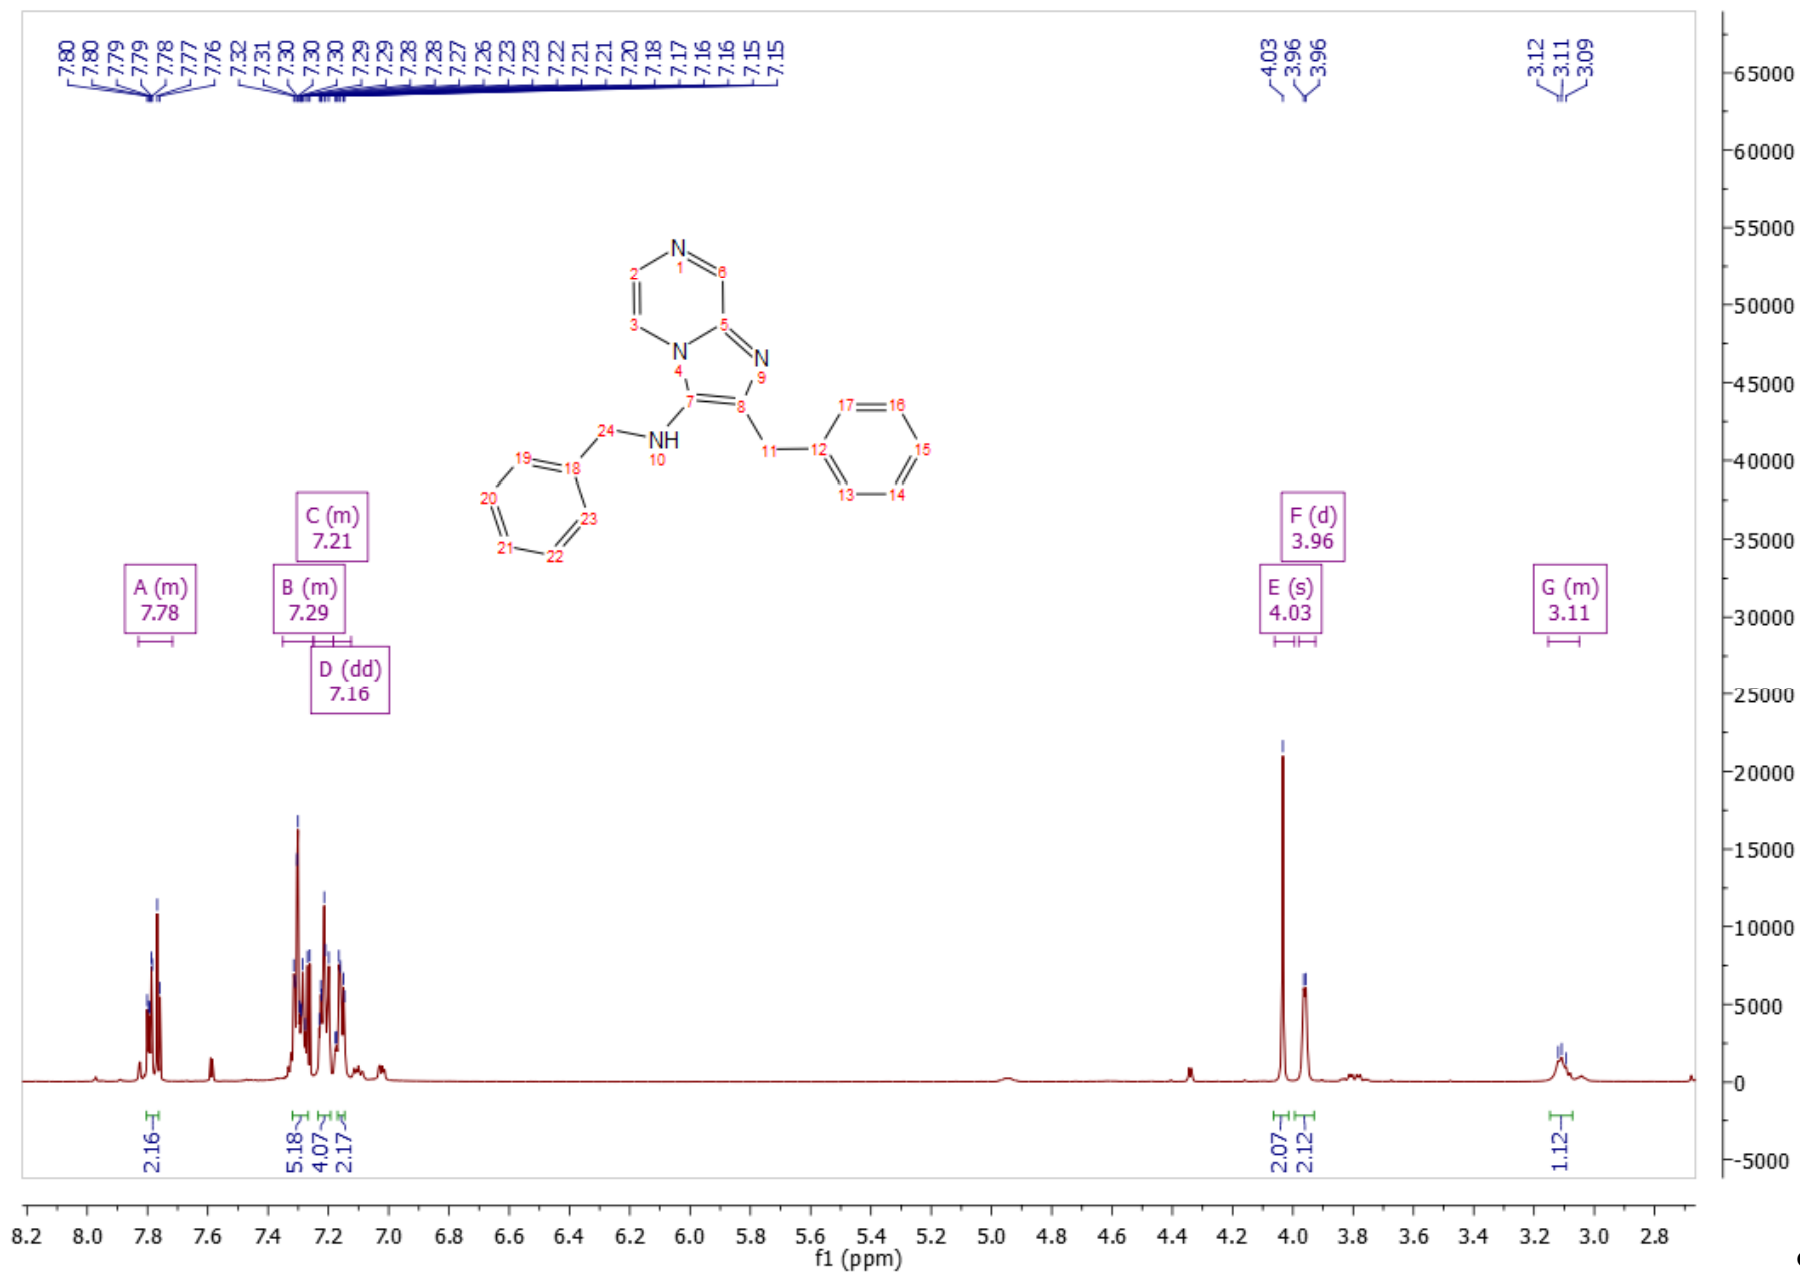

### 3d <sup>13</sup>C Spectrum

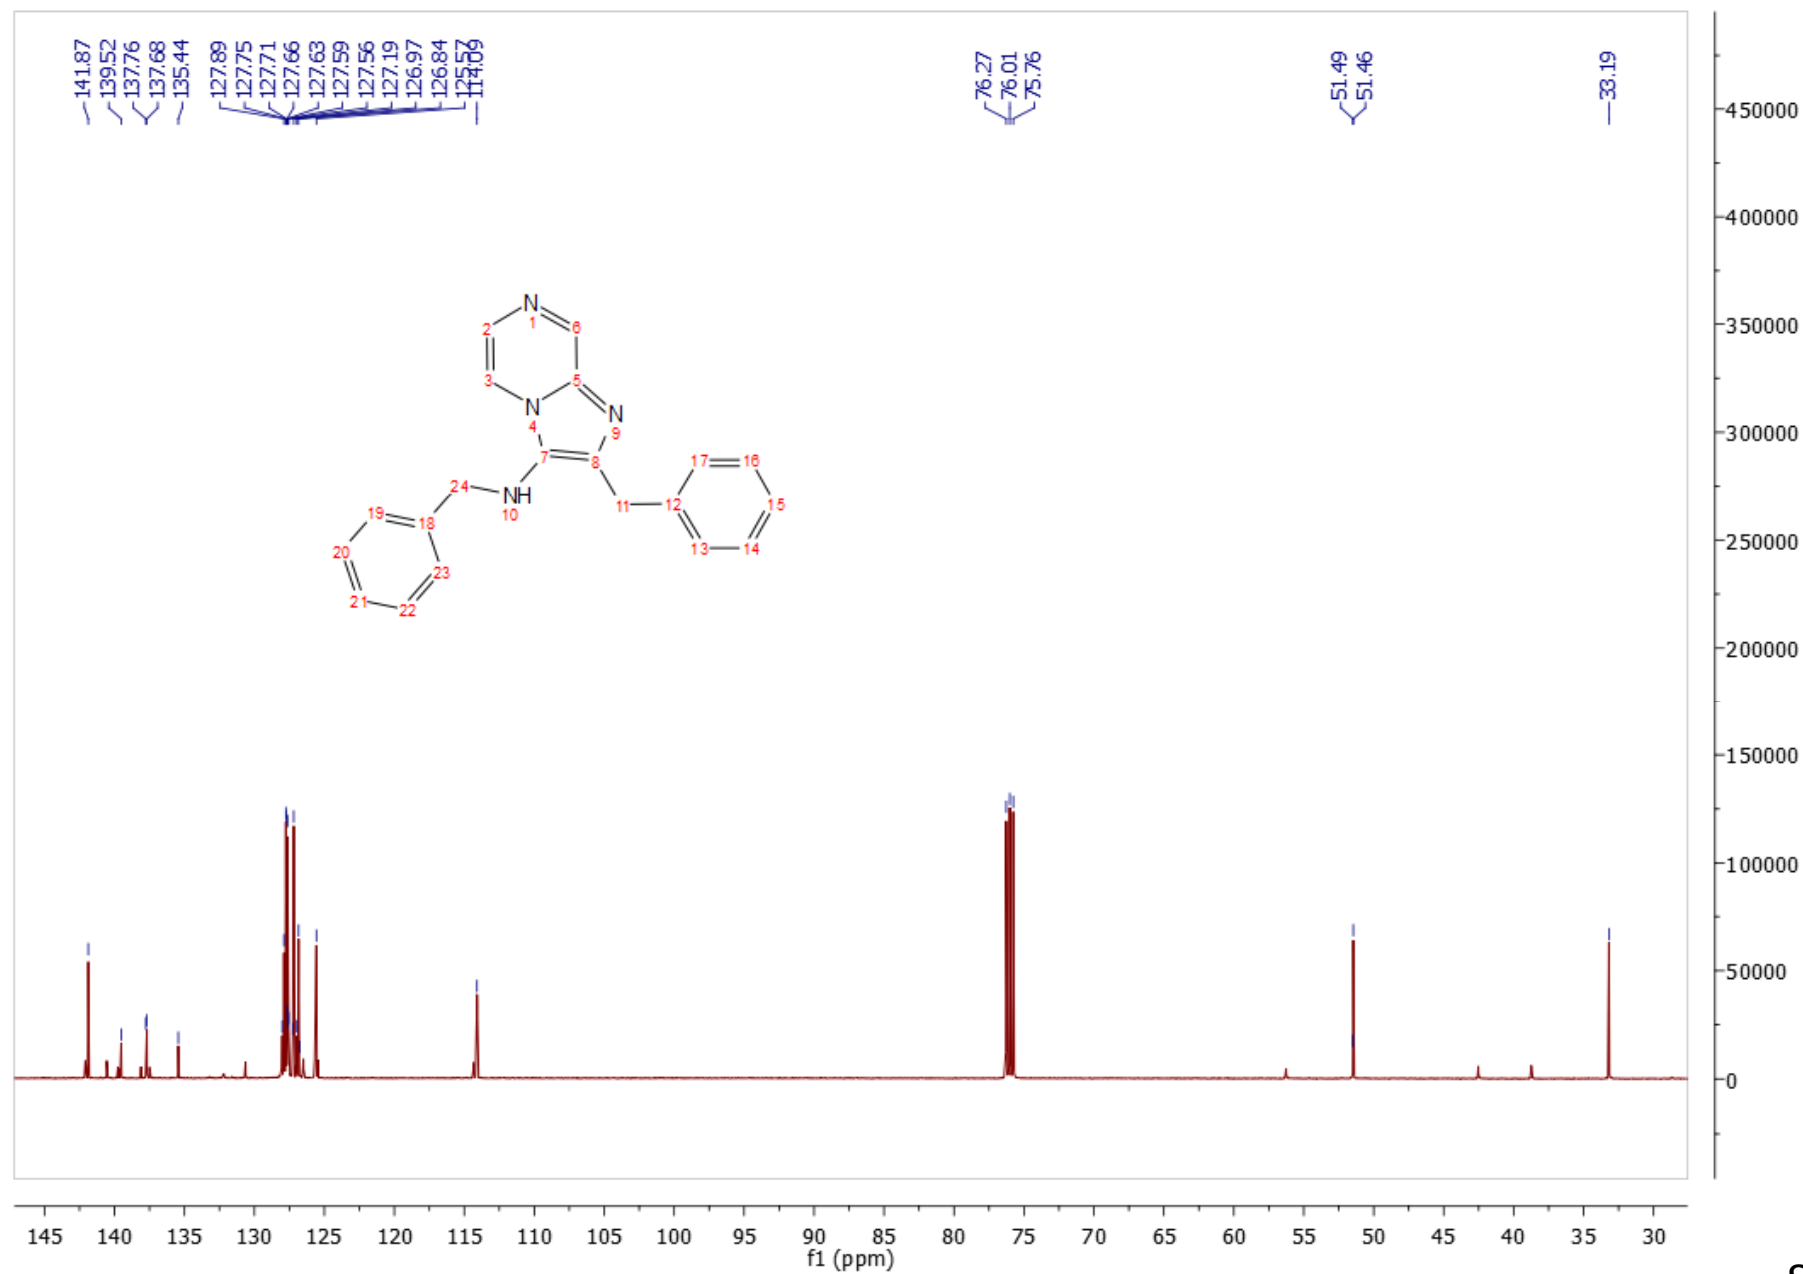

### 3d LC-MS

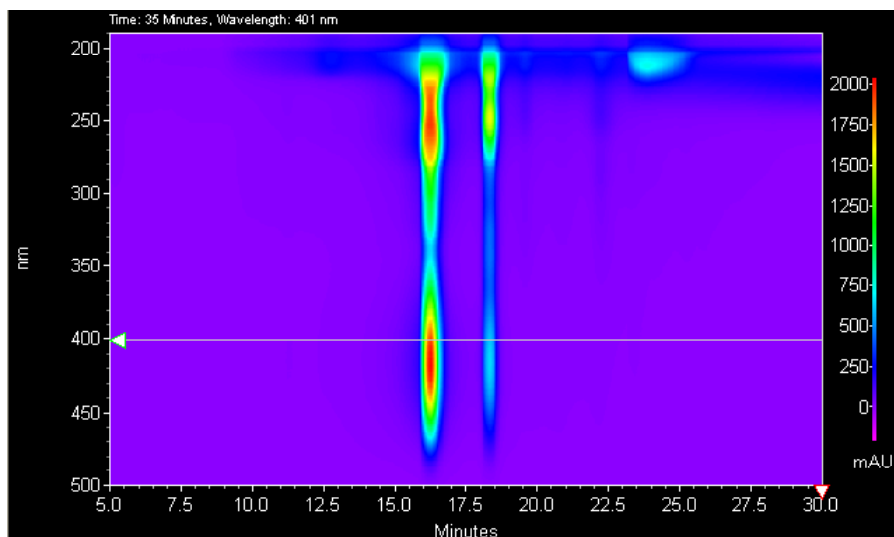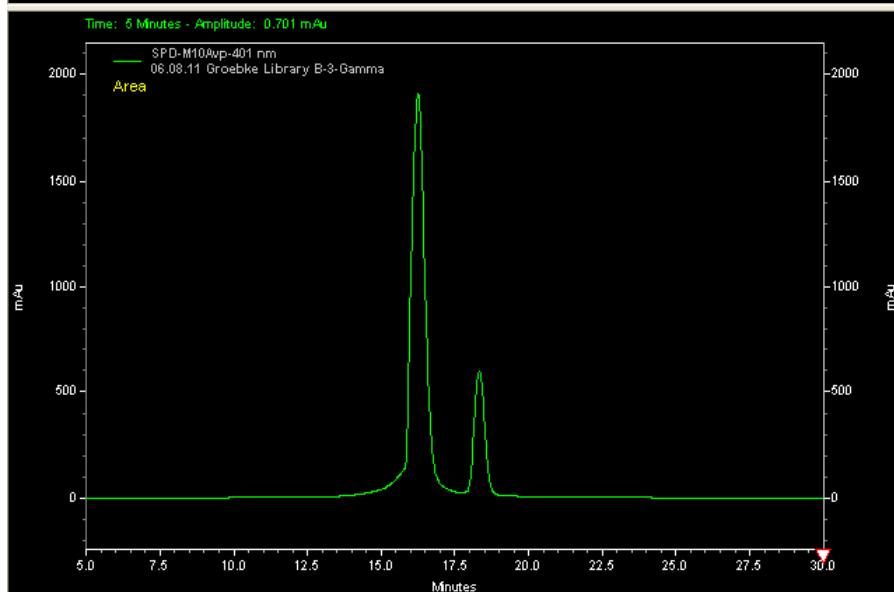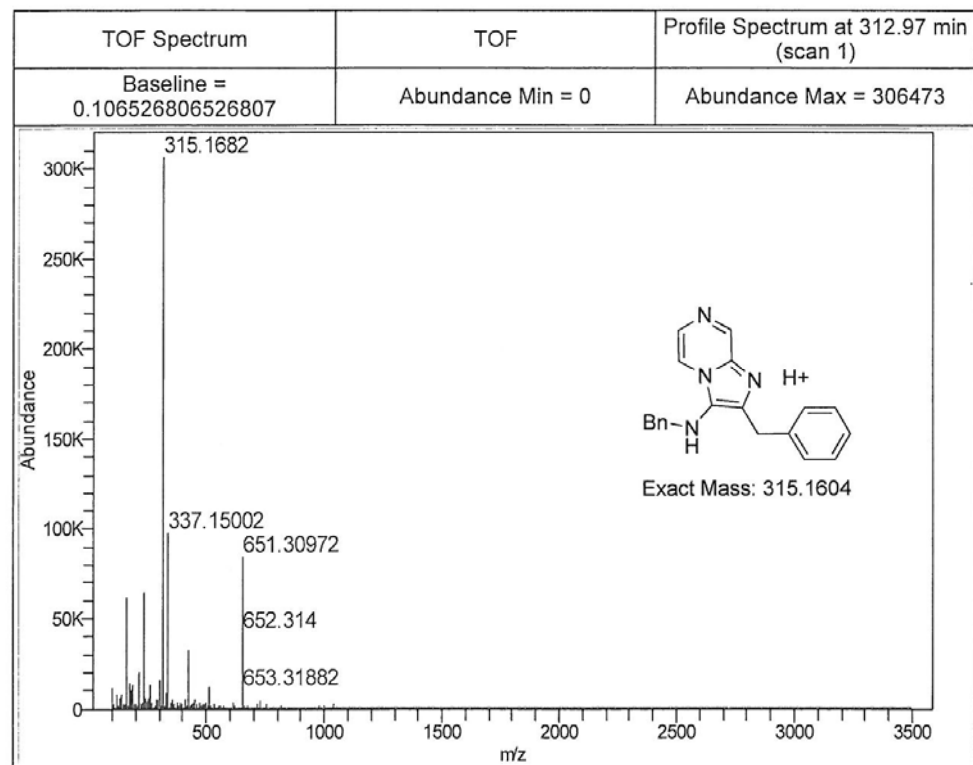

### 3e <sup>1</sup>H Spectrum

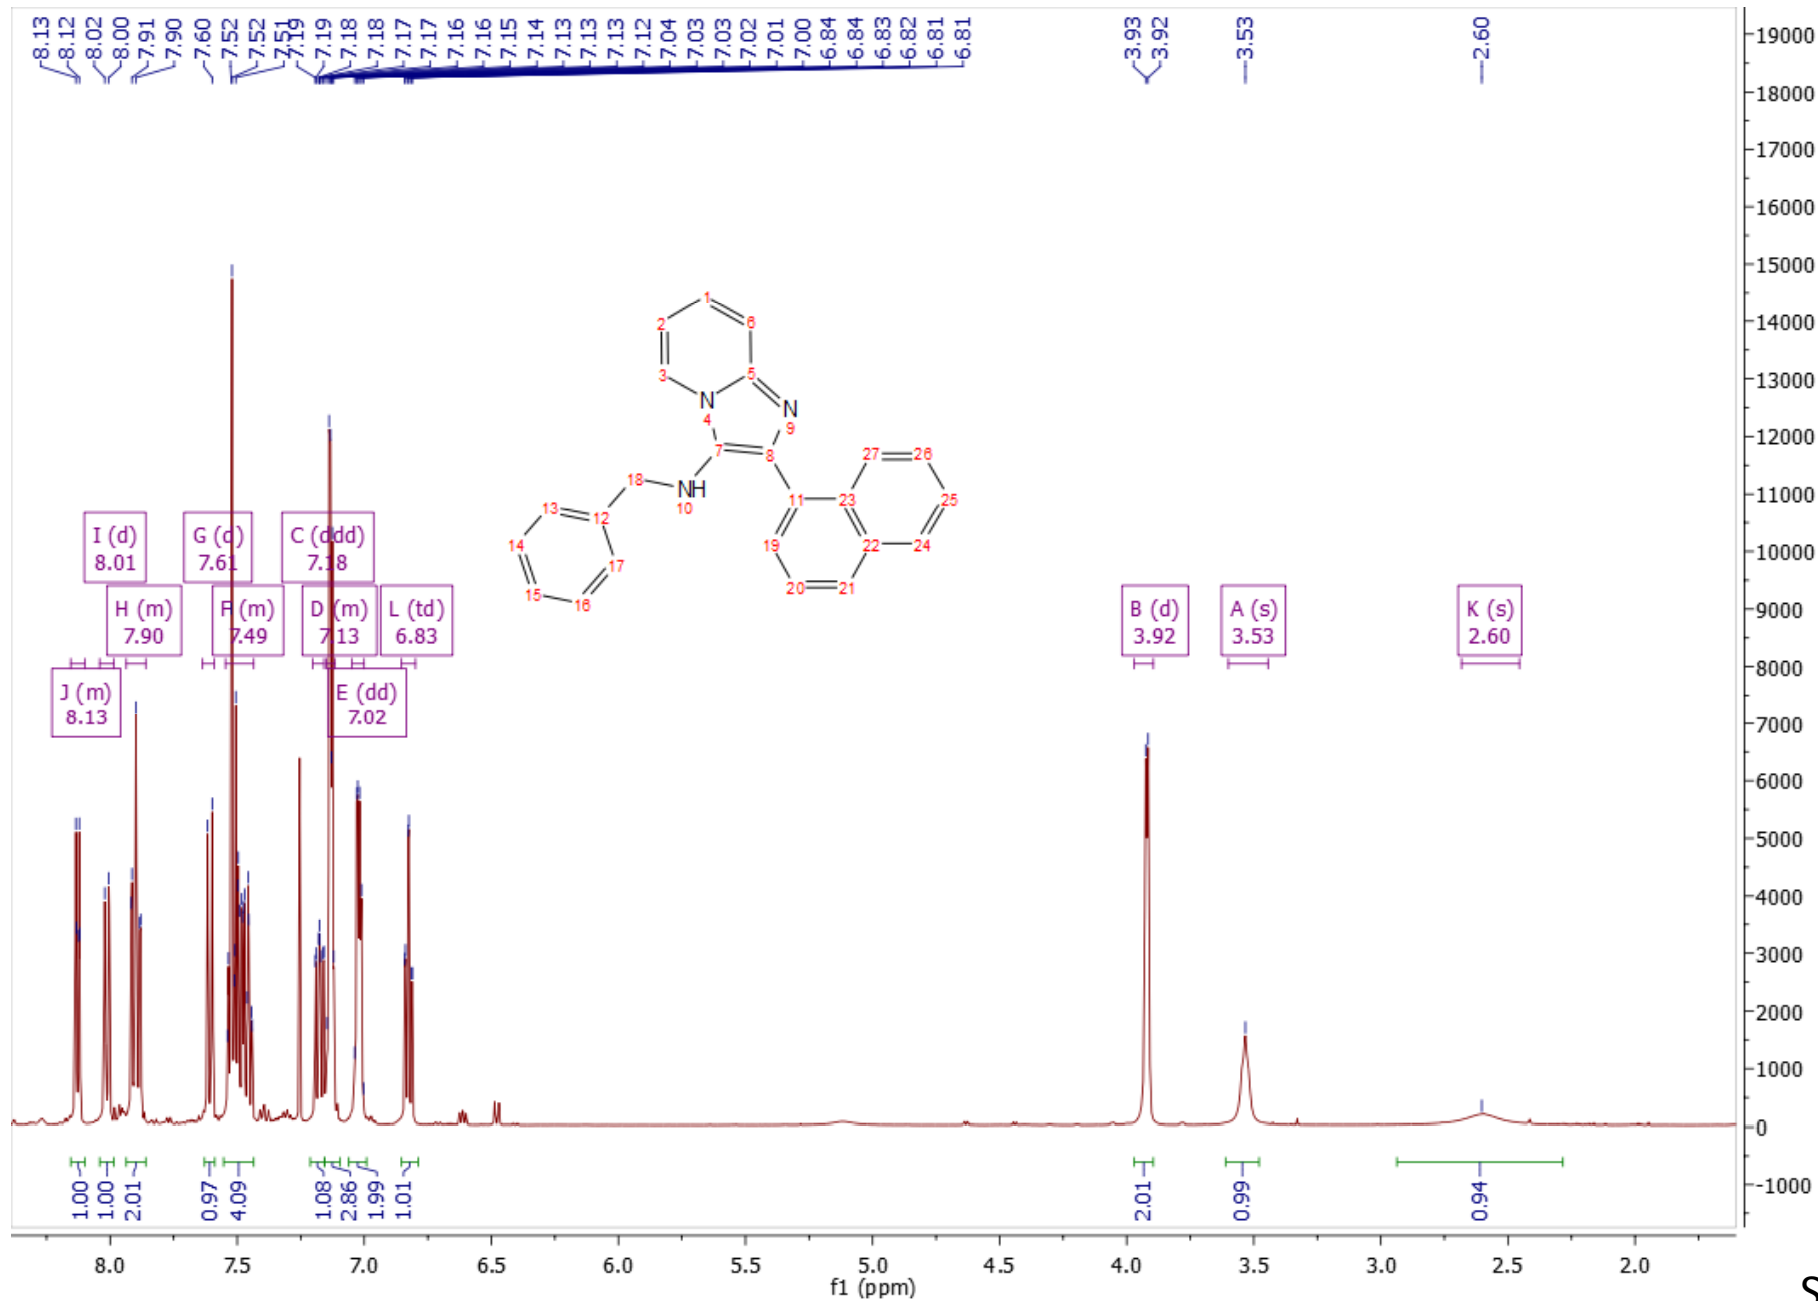

### 3e <sup>13</sup>C Spectrum

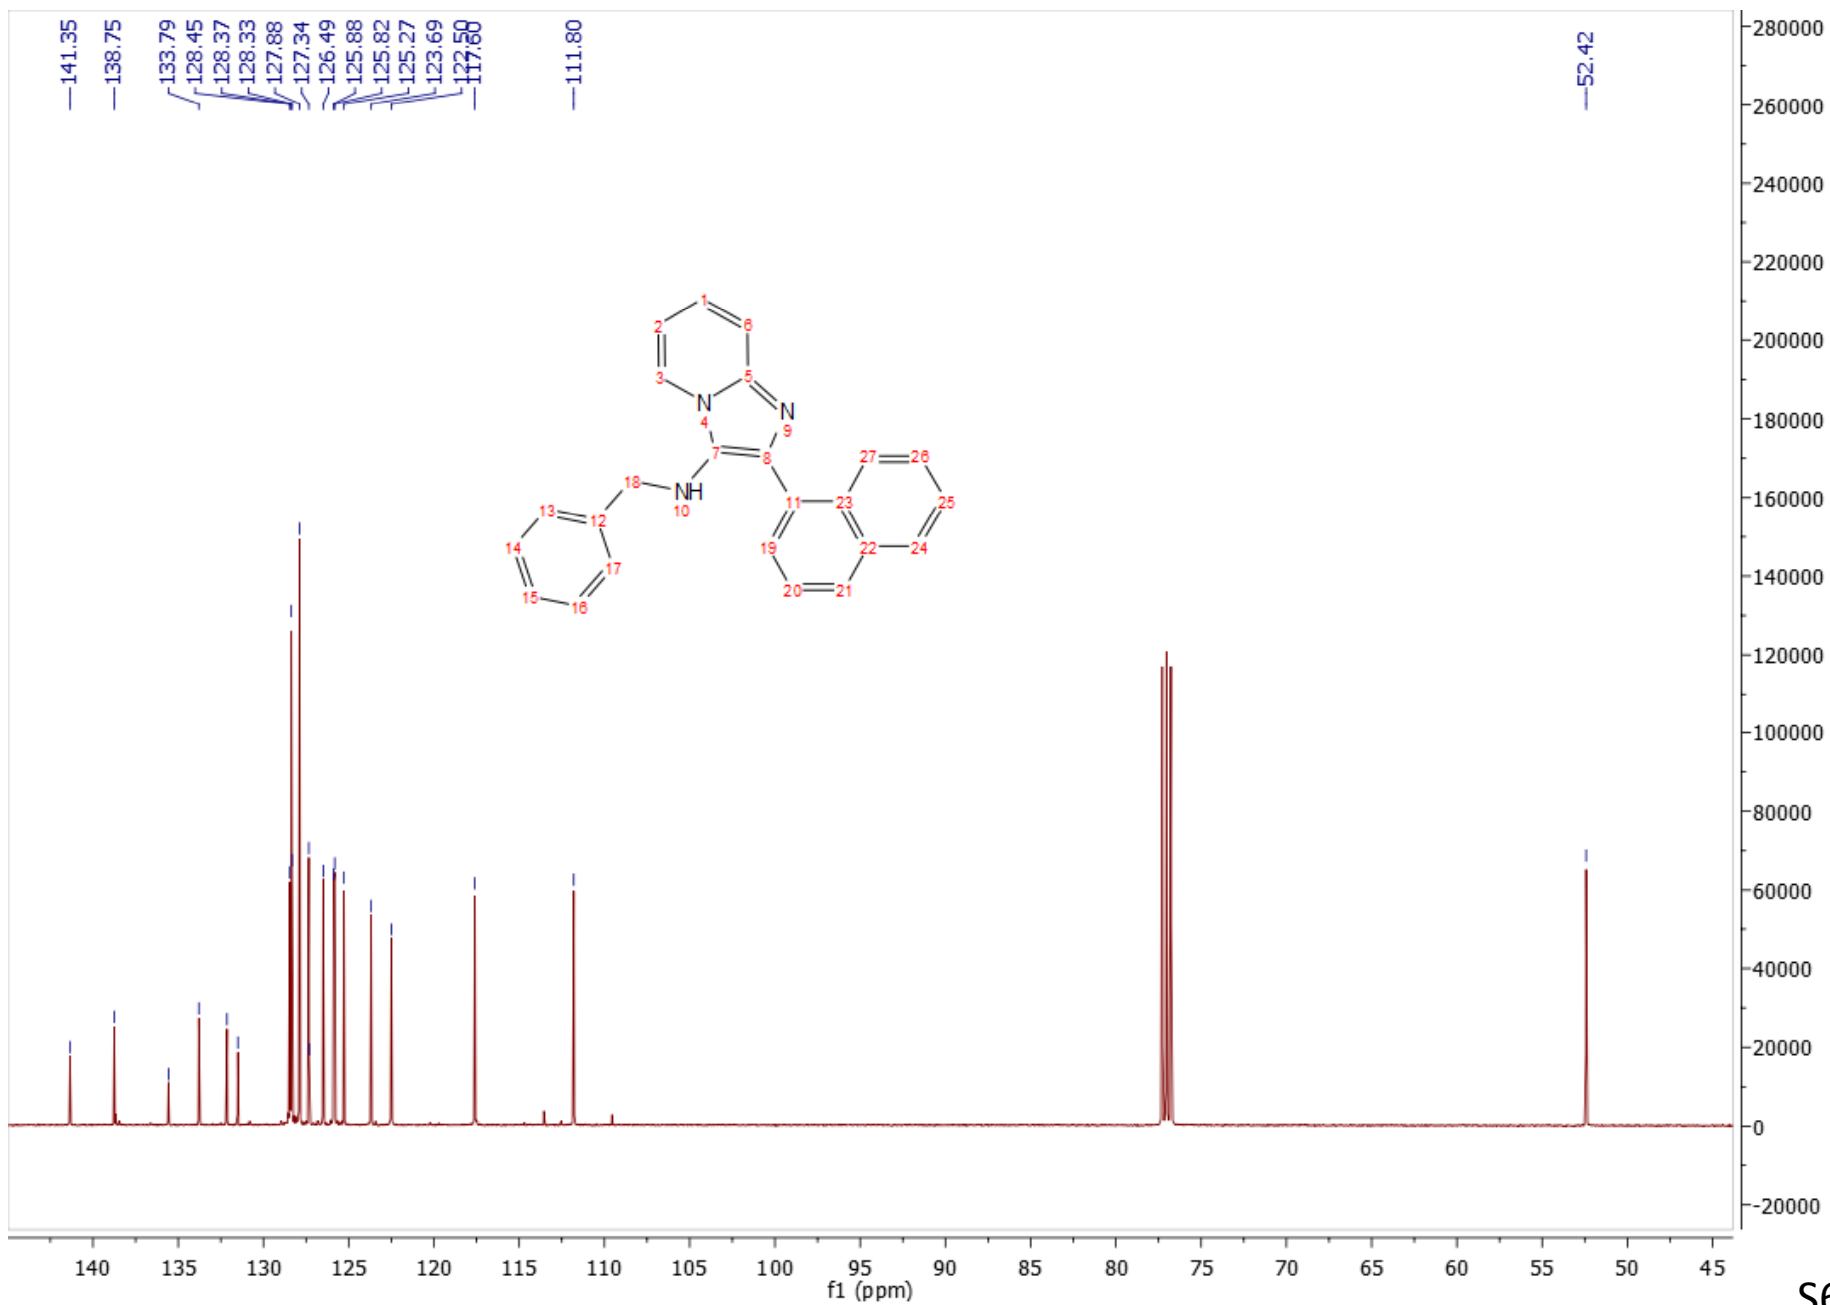

### 3e LC-MS

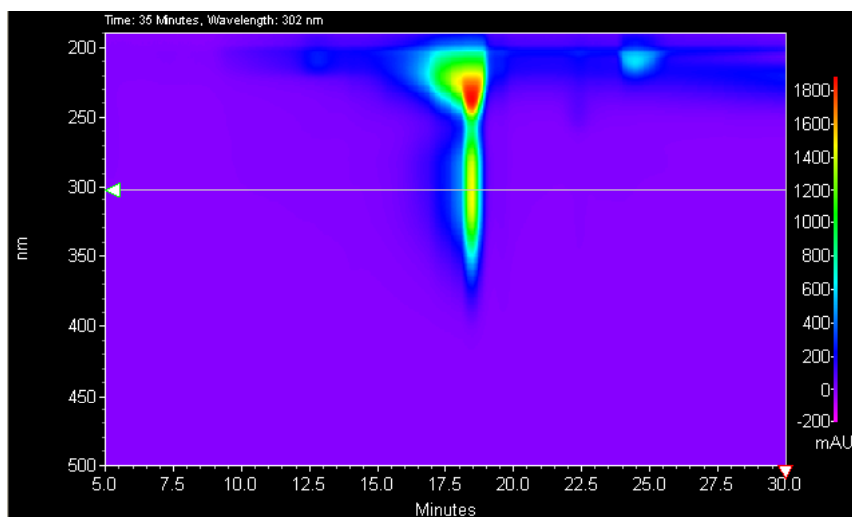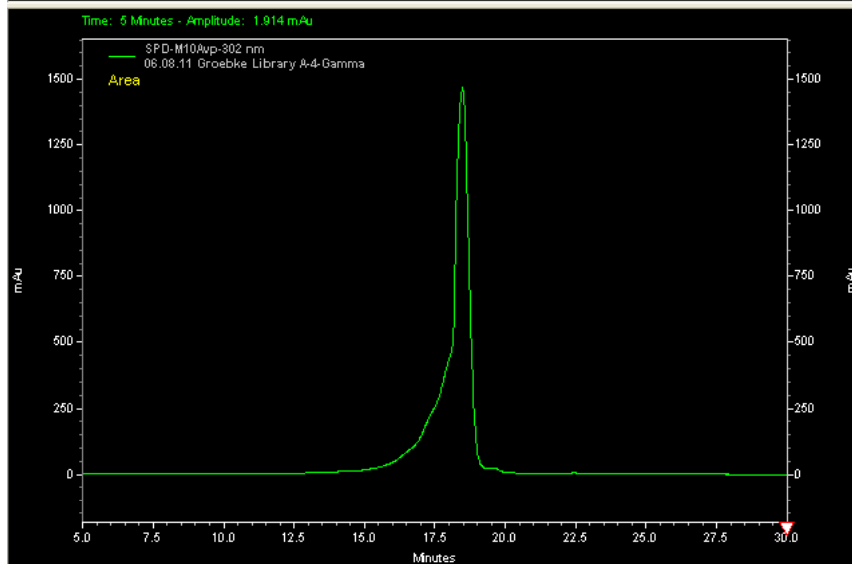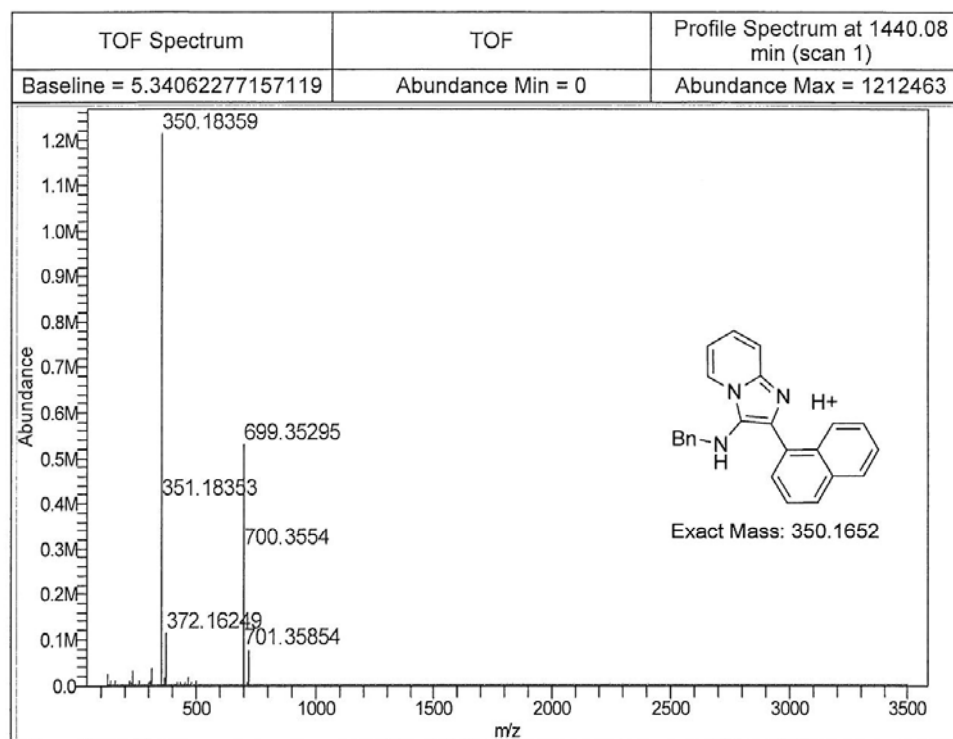



### 3f <sup>1</sup>H Spectrum

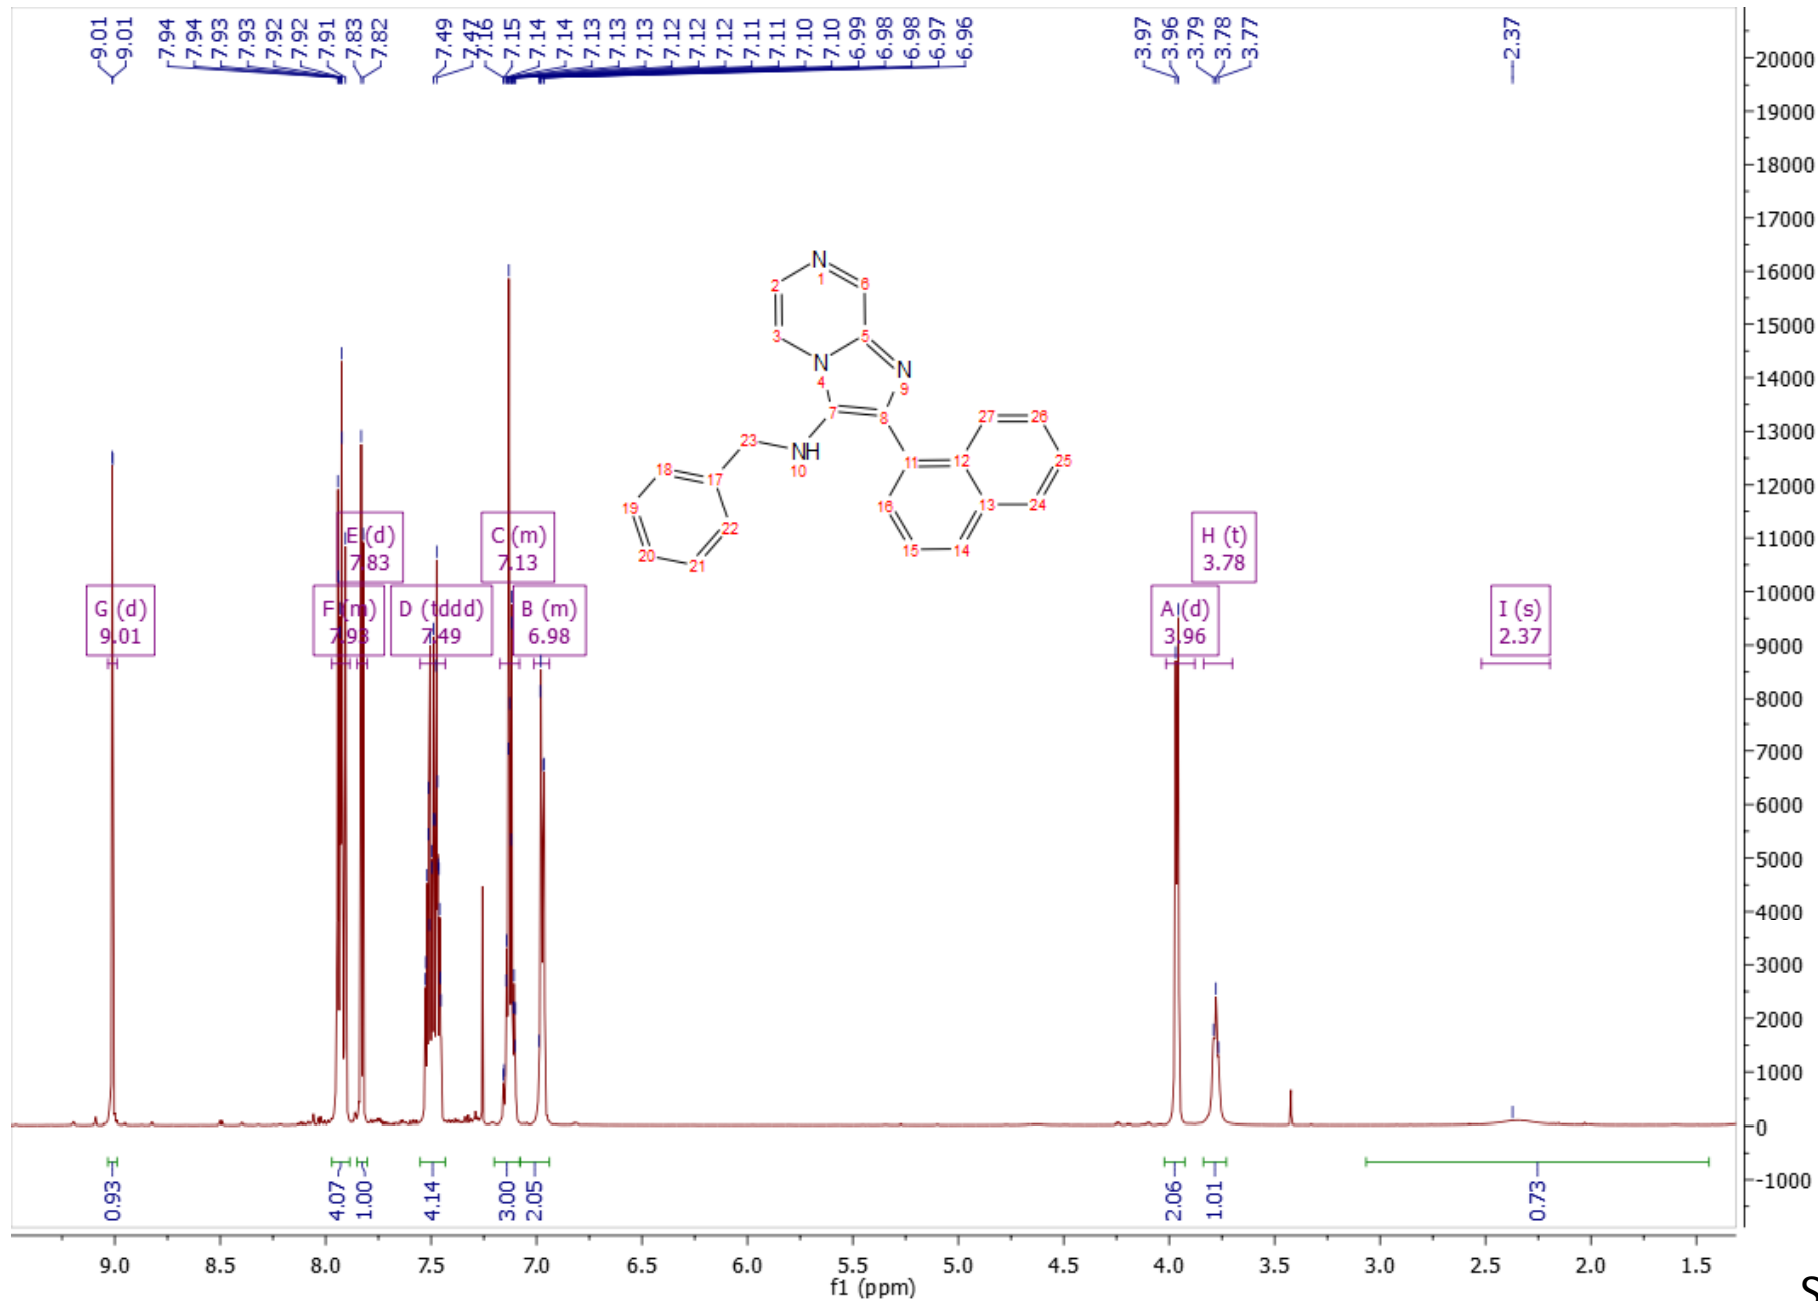

### 3f <sup>13</sup>C Spectrum

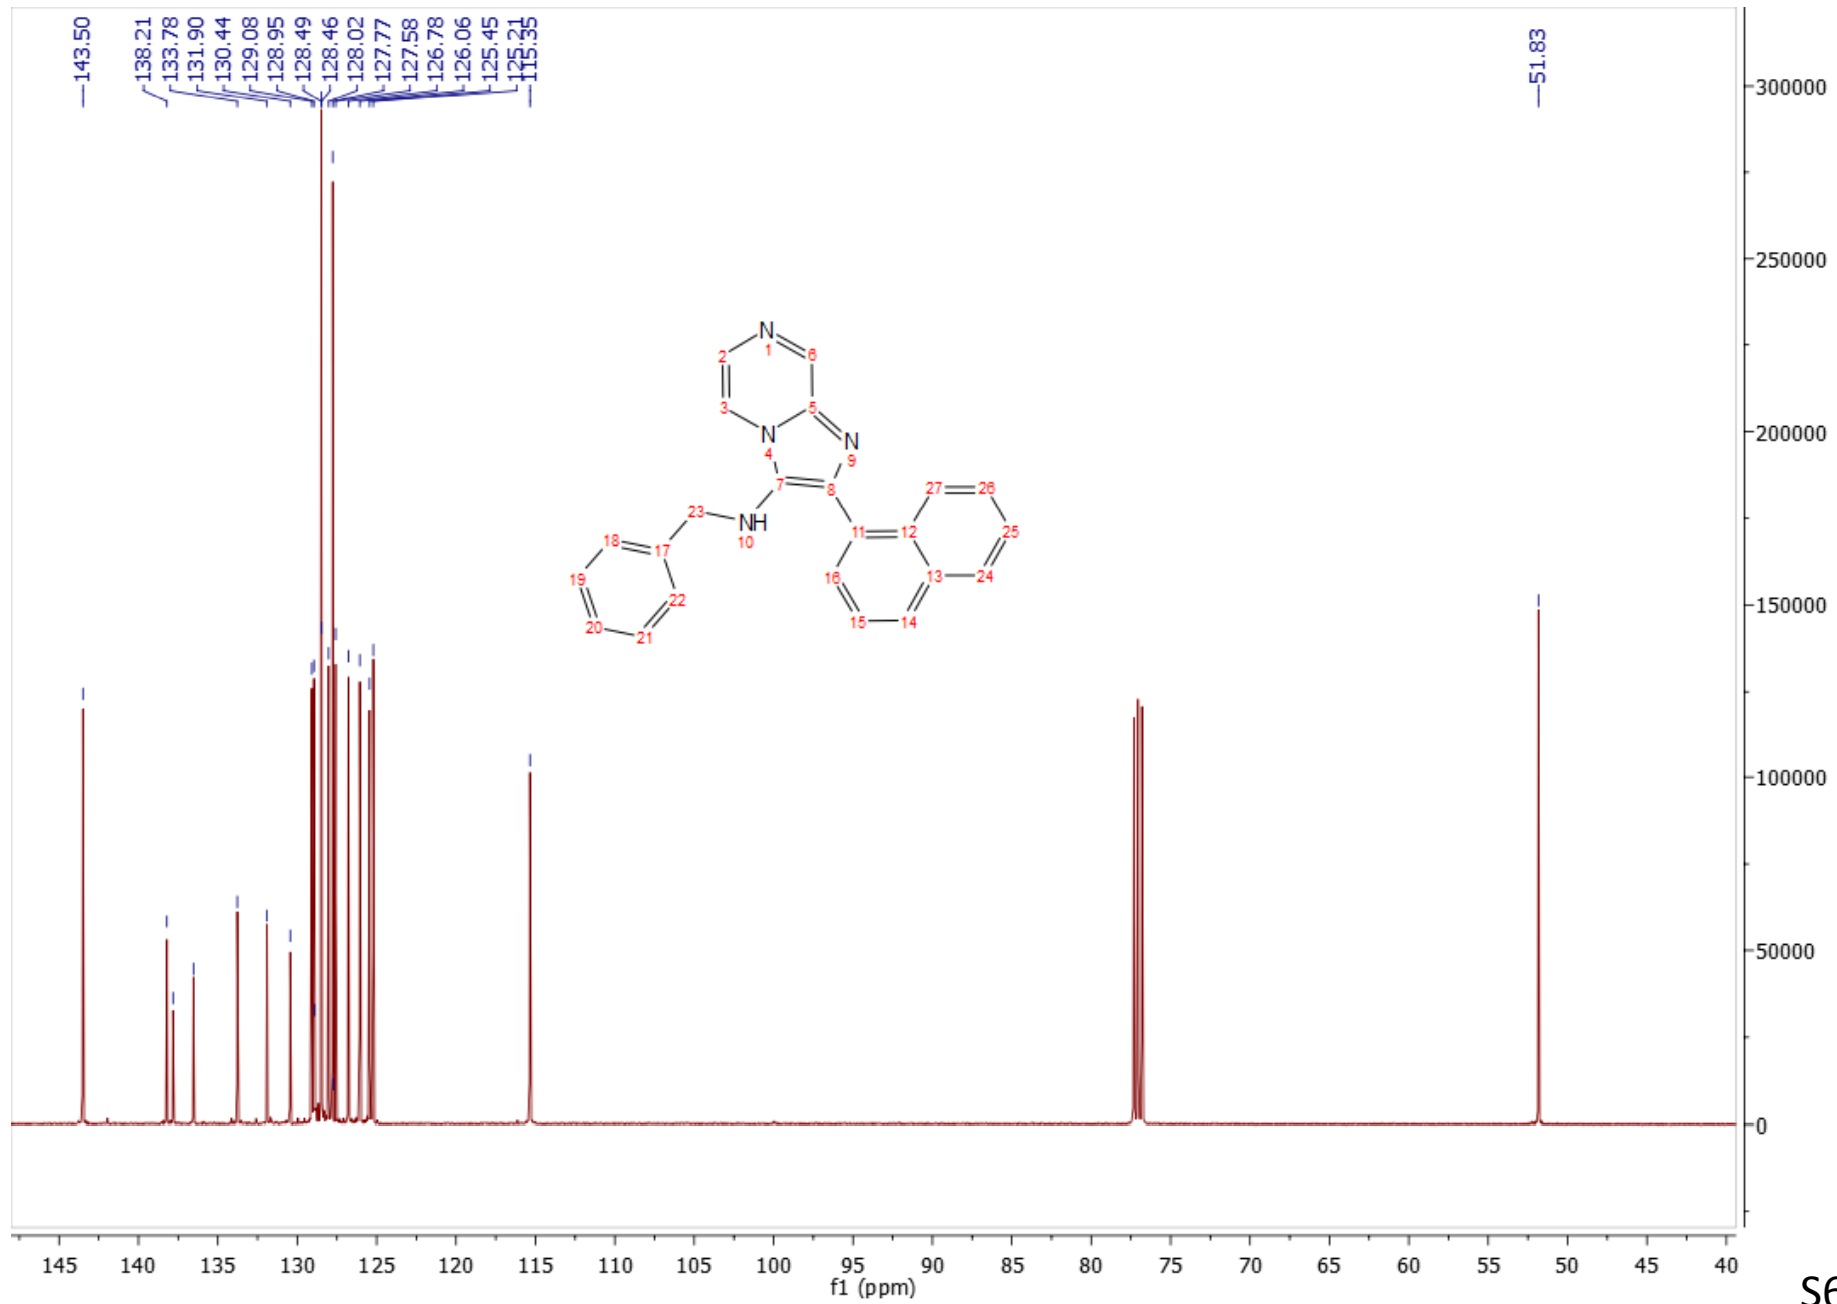

### 3f LC-MS

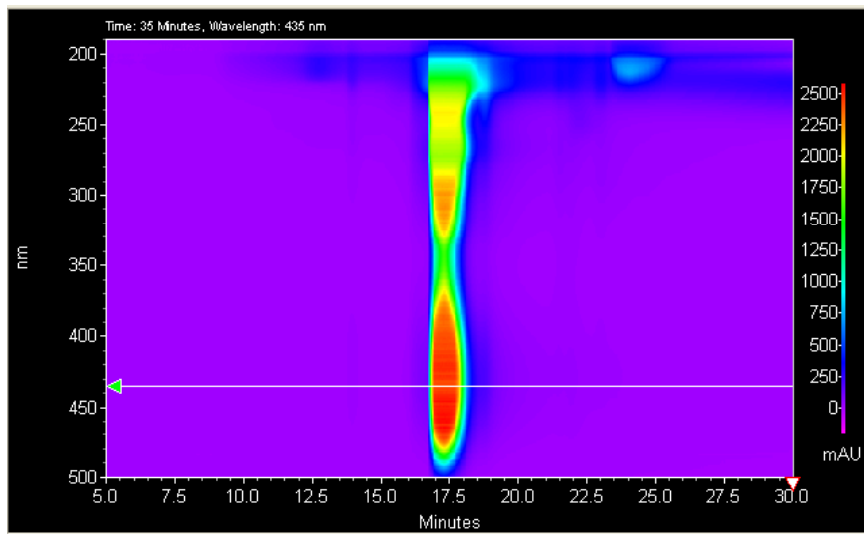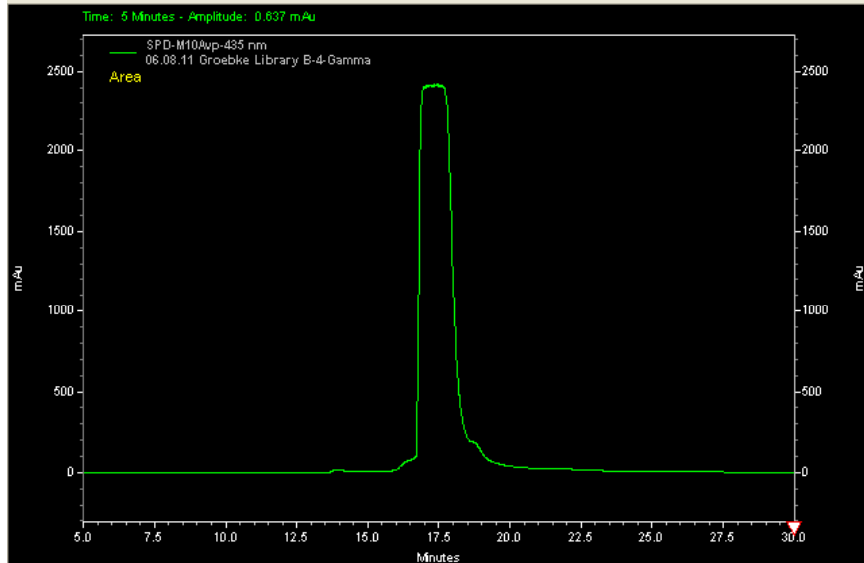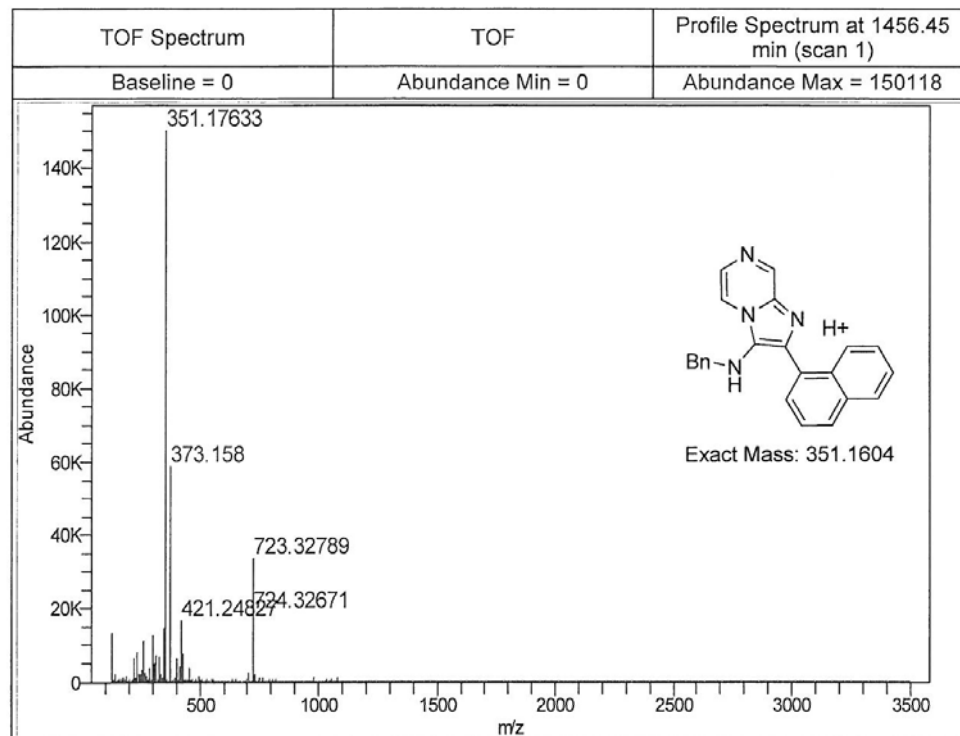

# 3g <sup>1</sup>H Spectrum

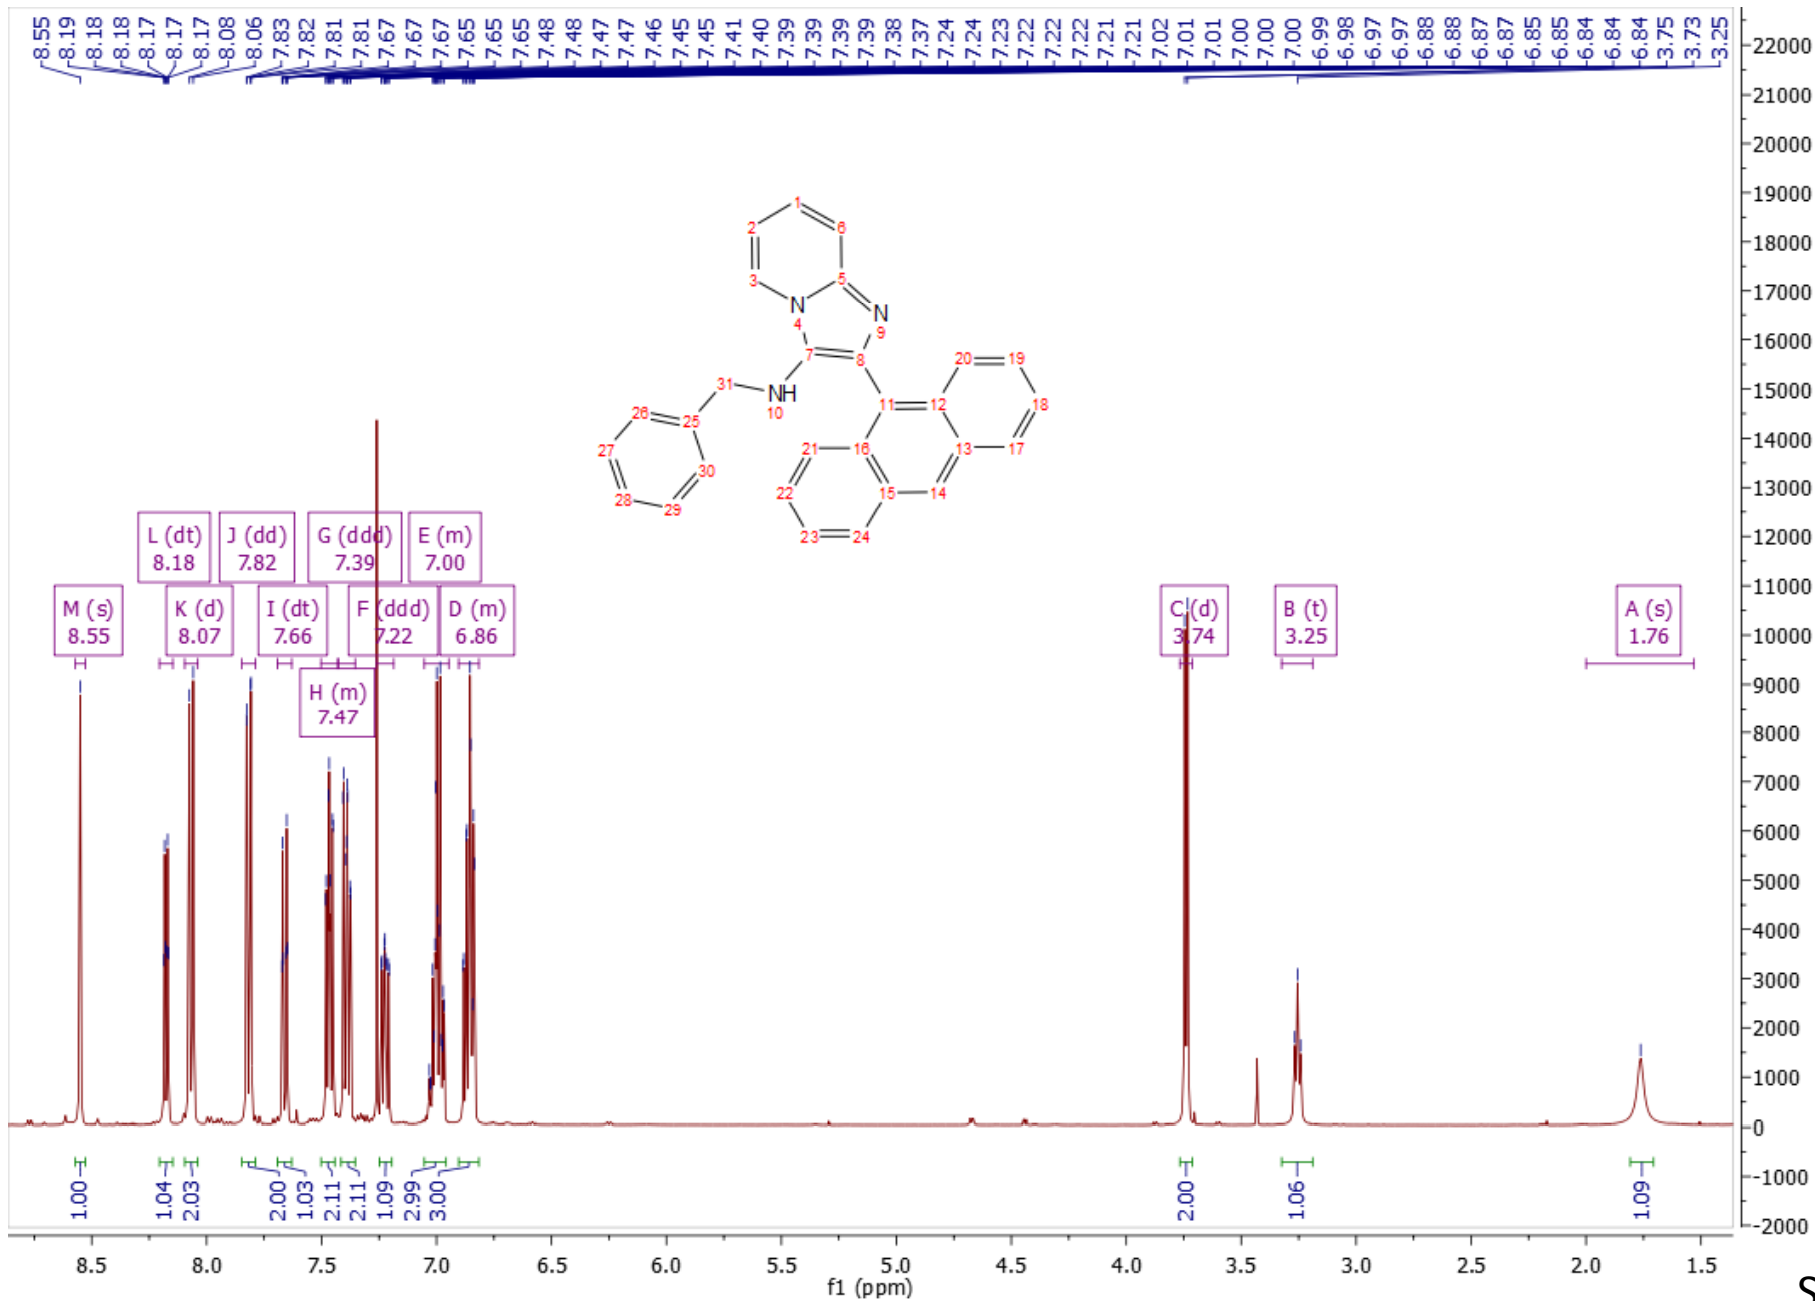

### 3g <sup>13</sup>C Spectrum

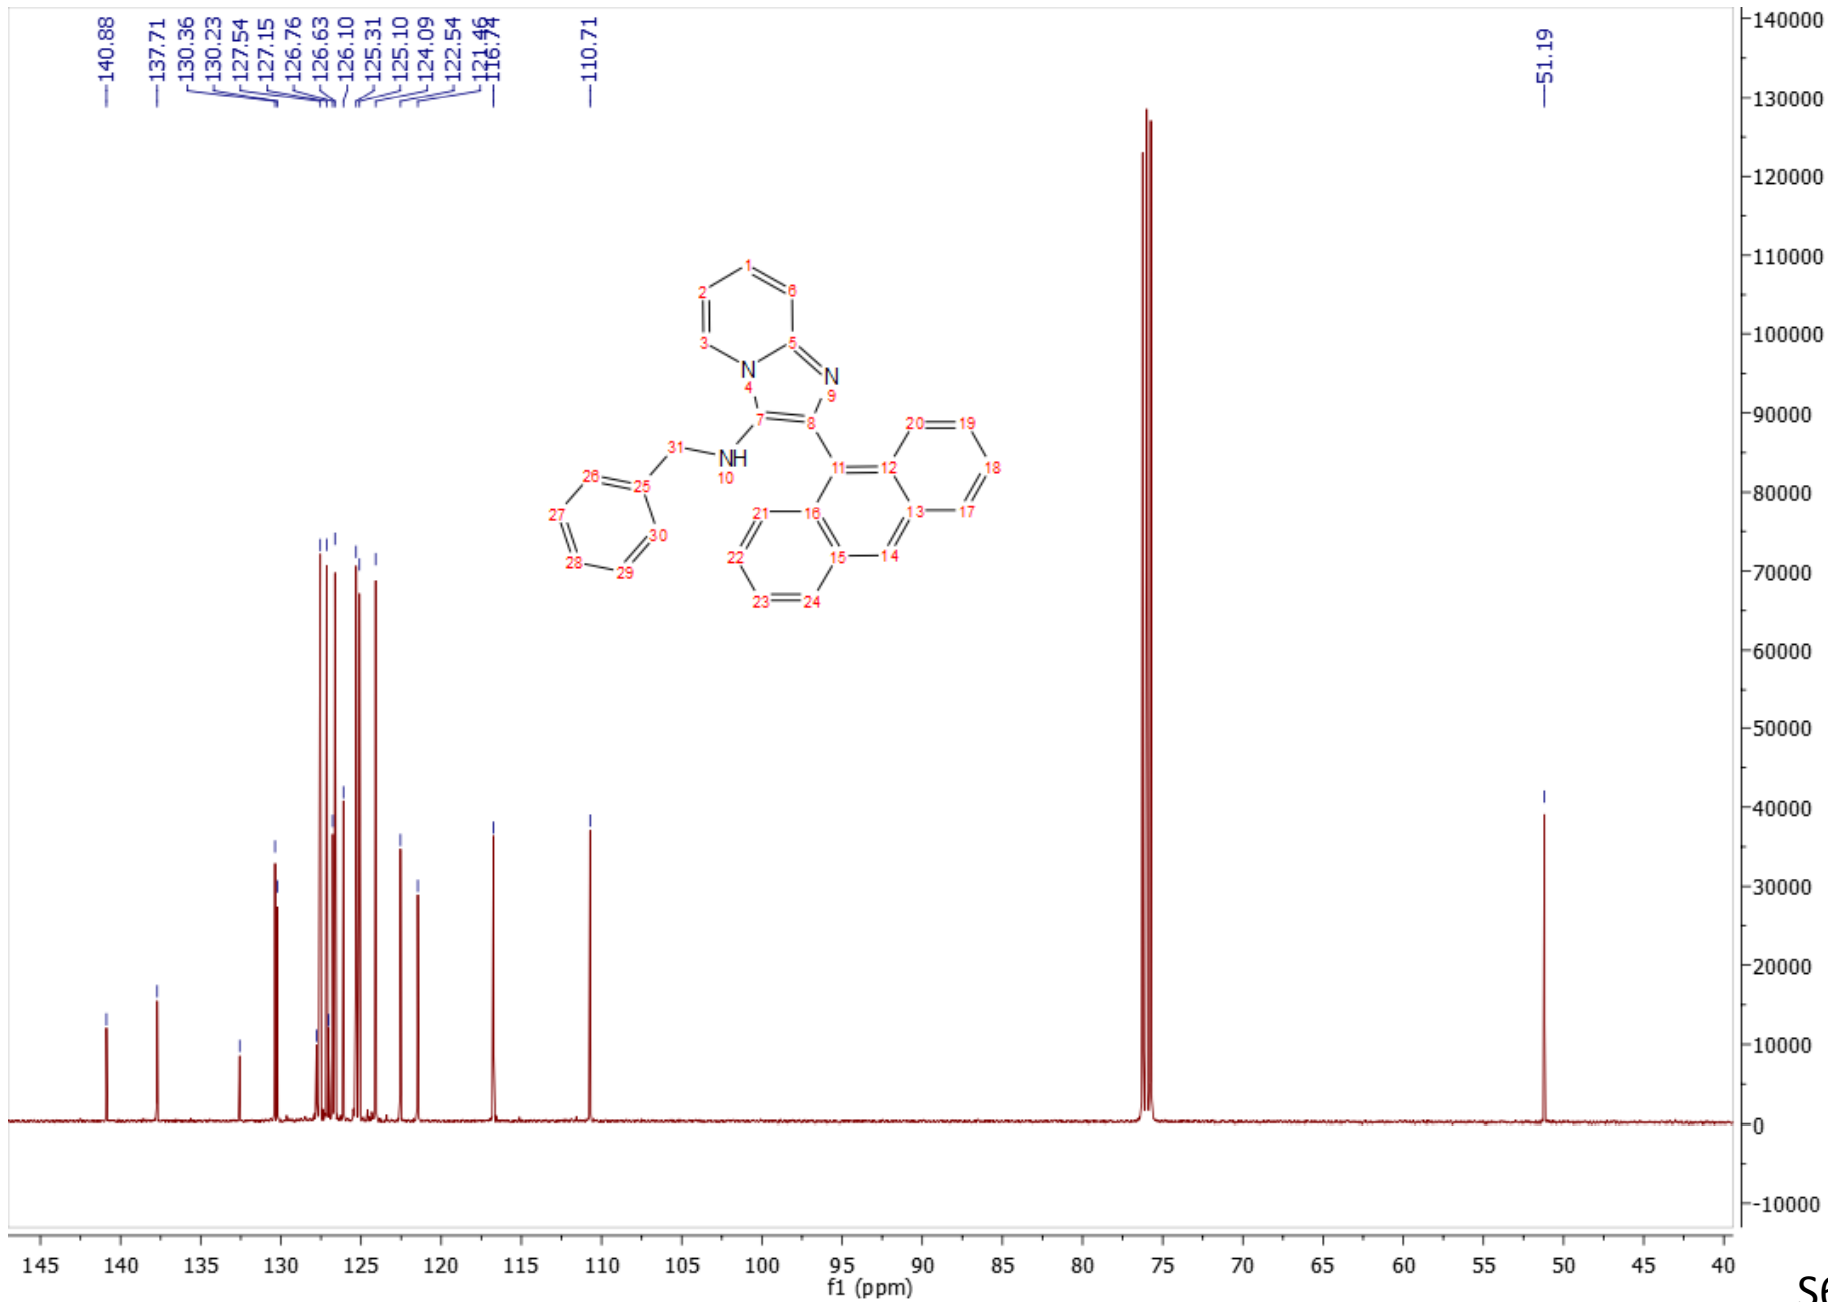

# 3g LC-MS

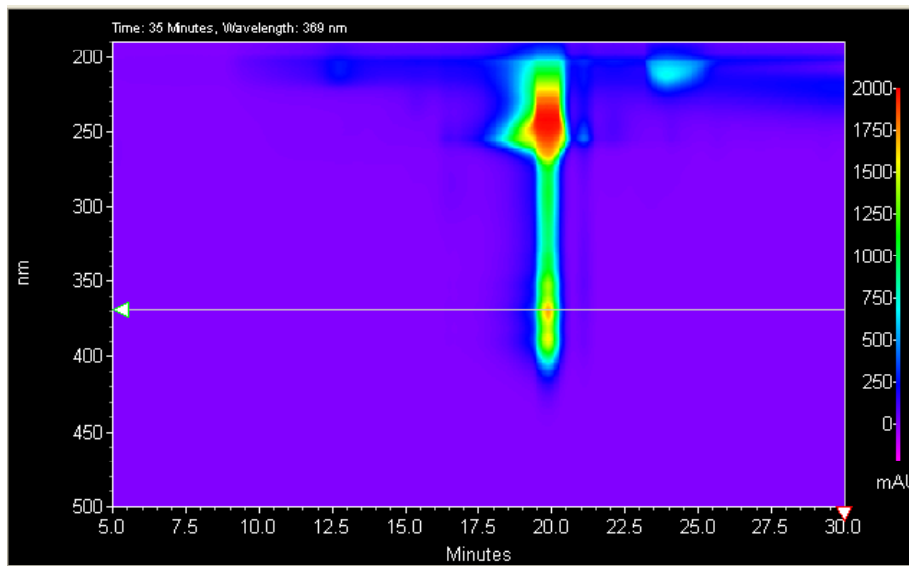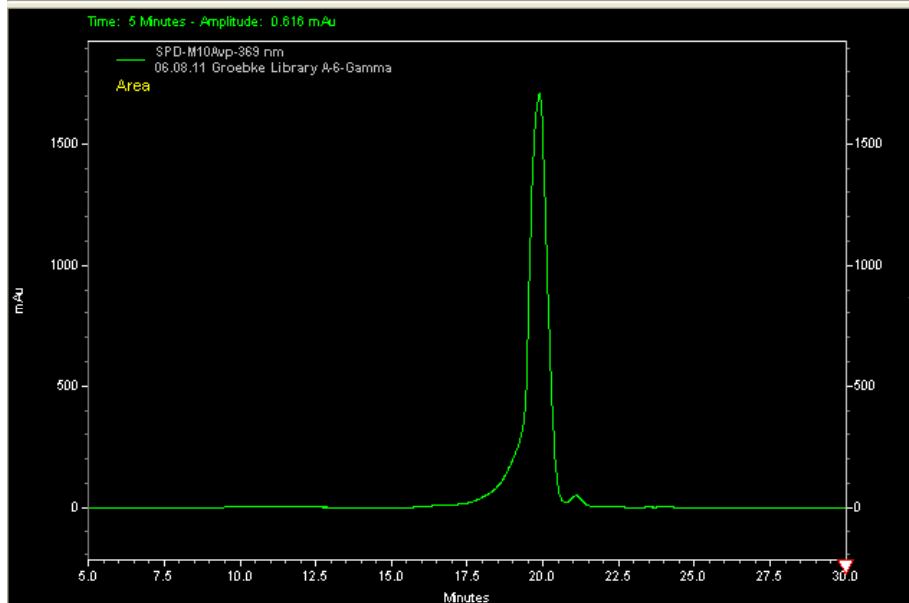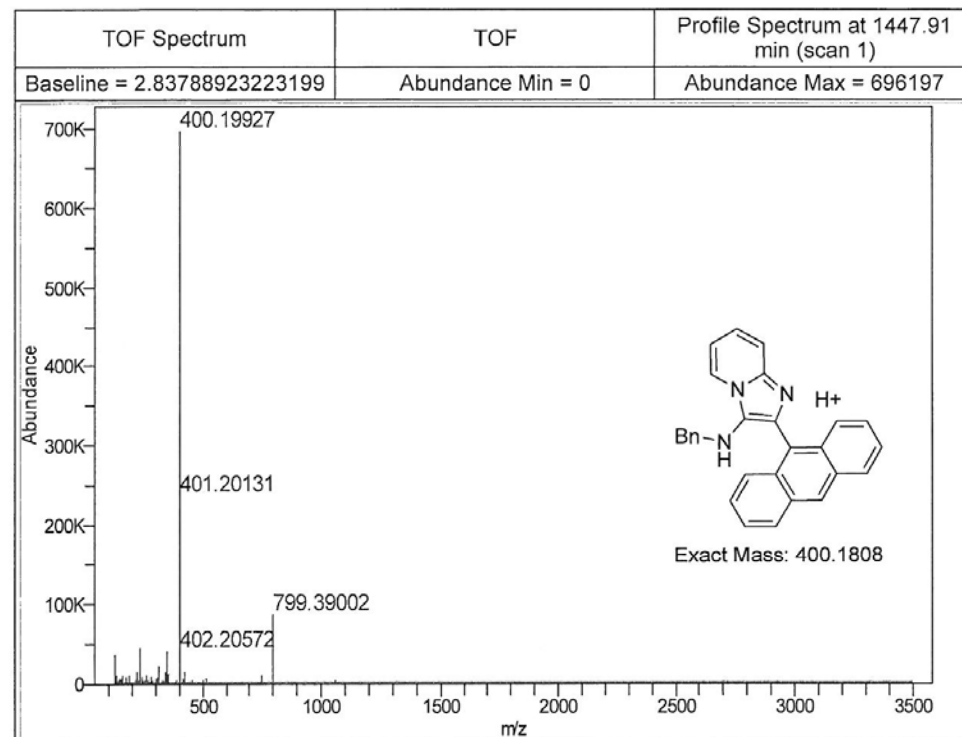

### 3h <sup>1</sup>H Spectrum

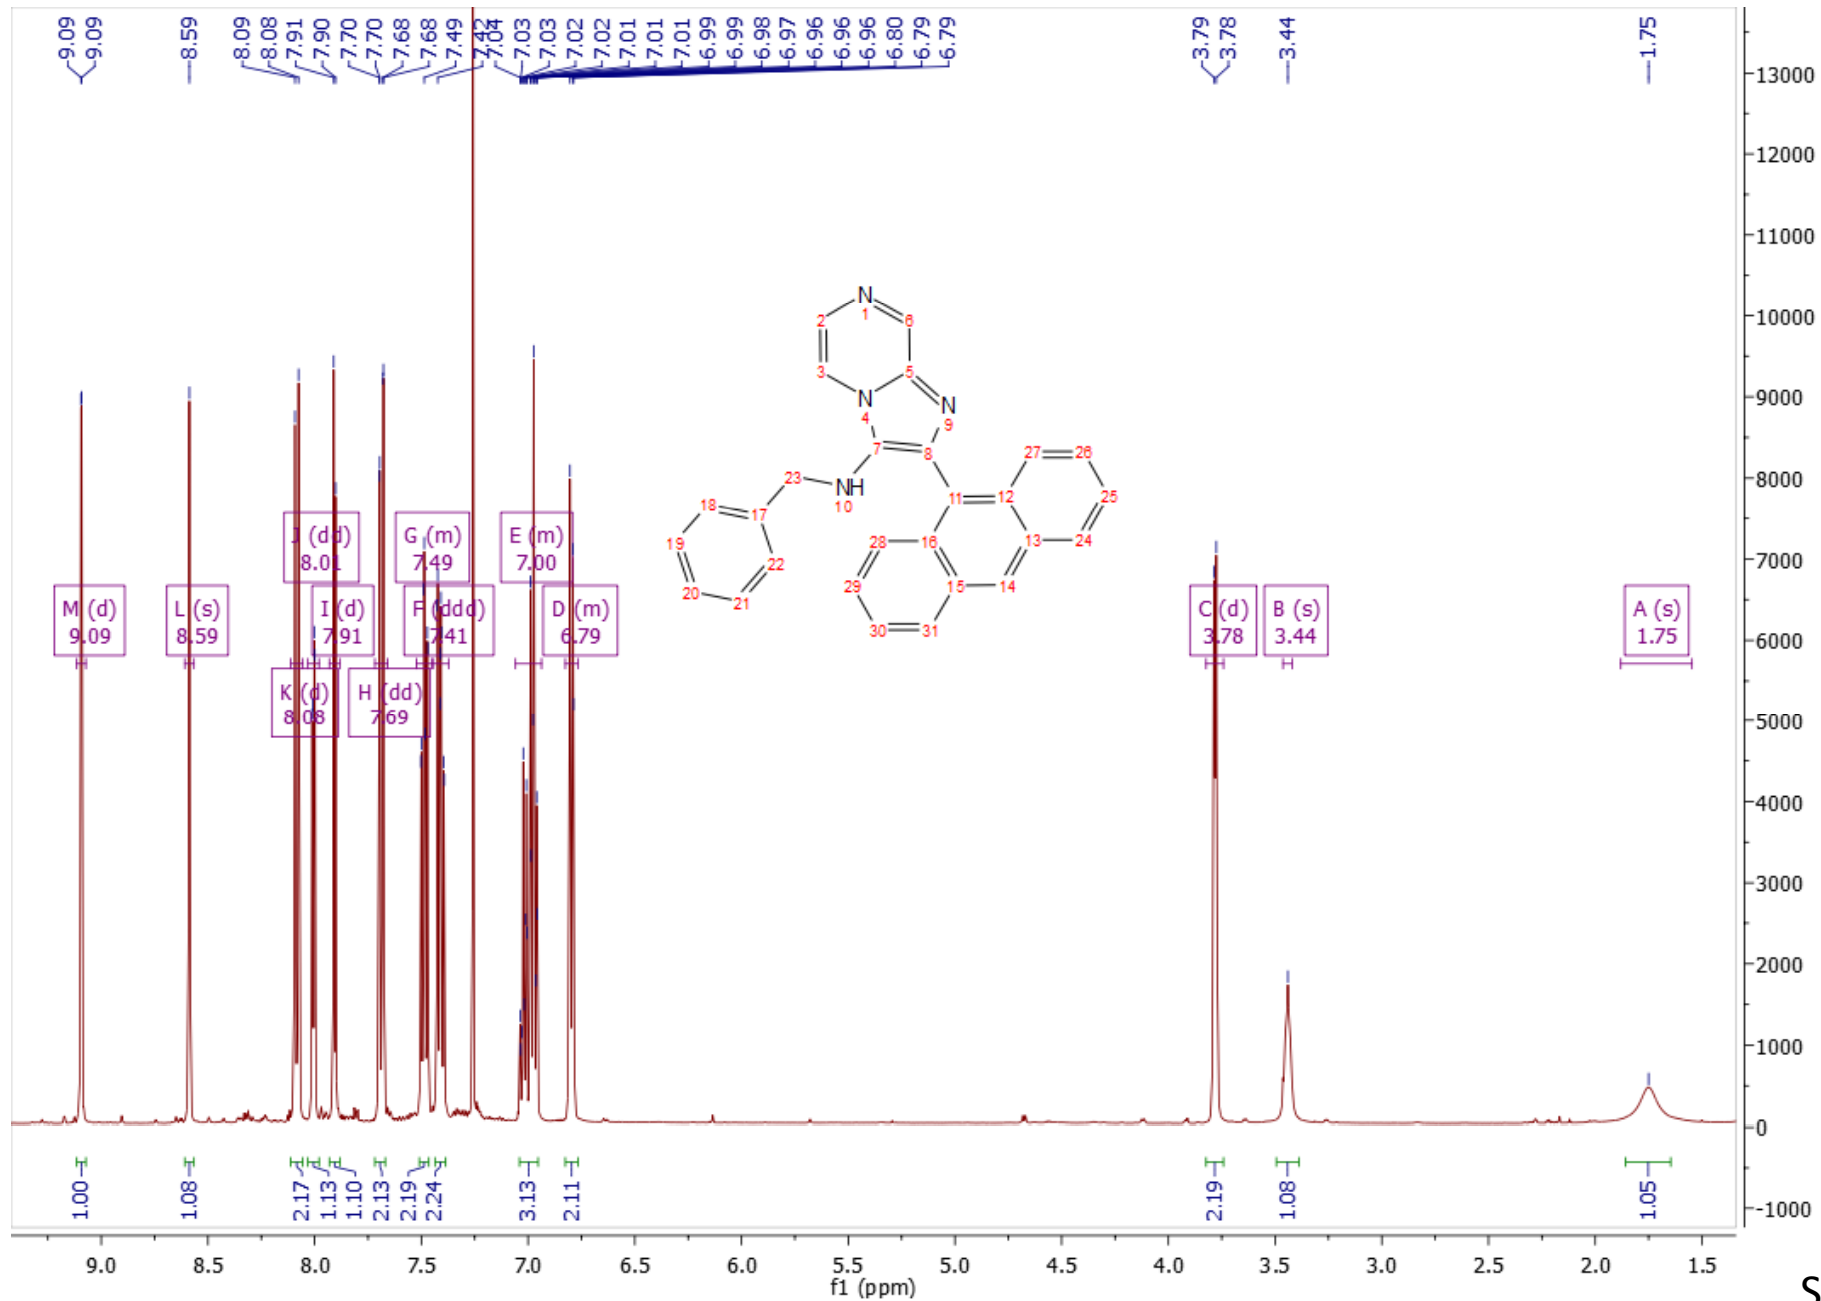

### 3h <sup>13</sup>C Spectrum

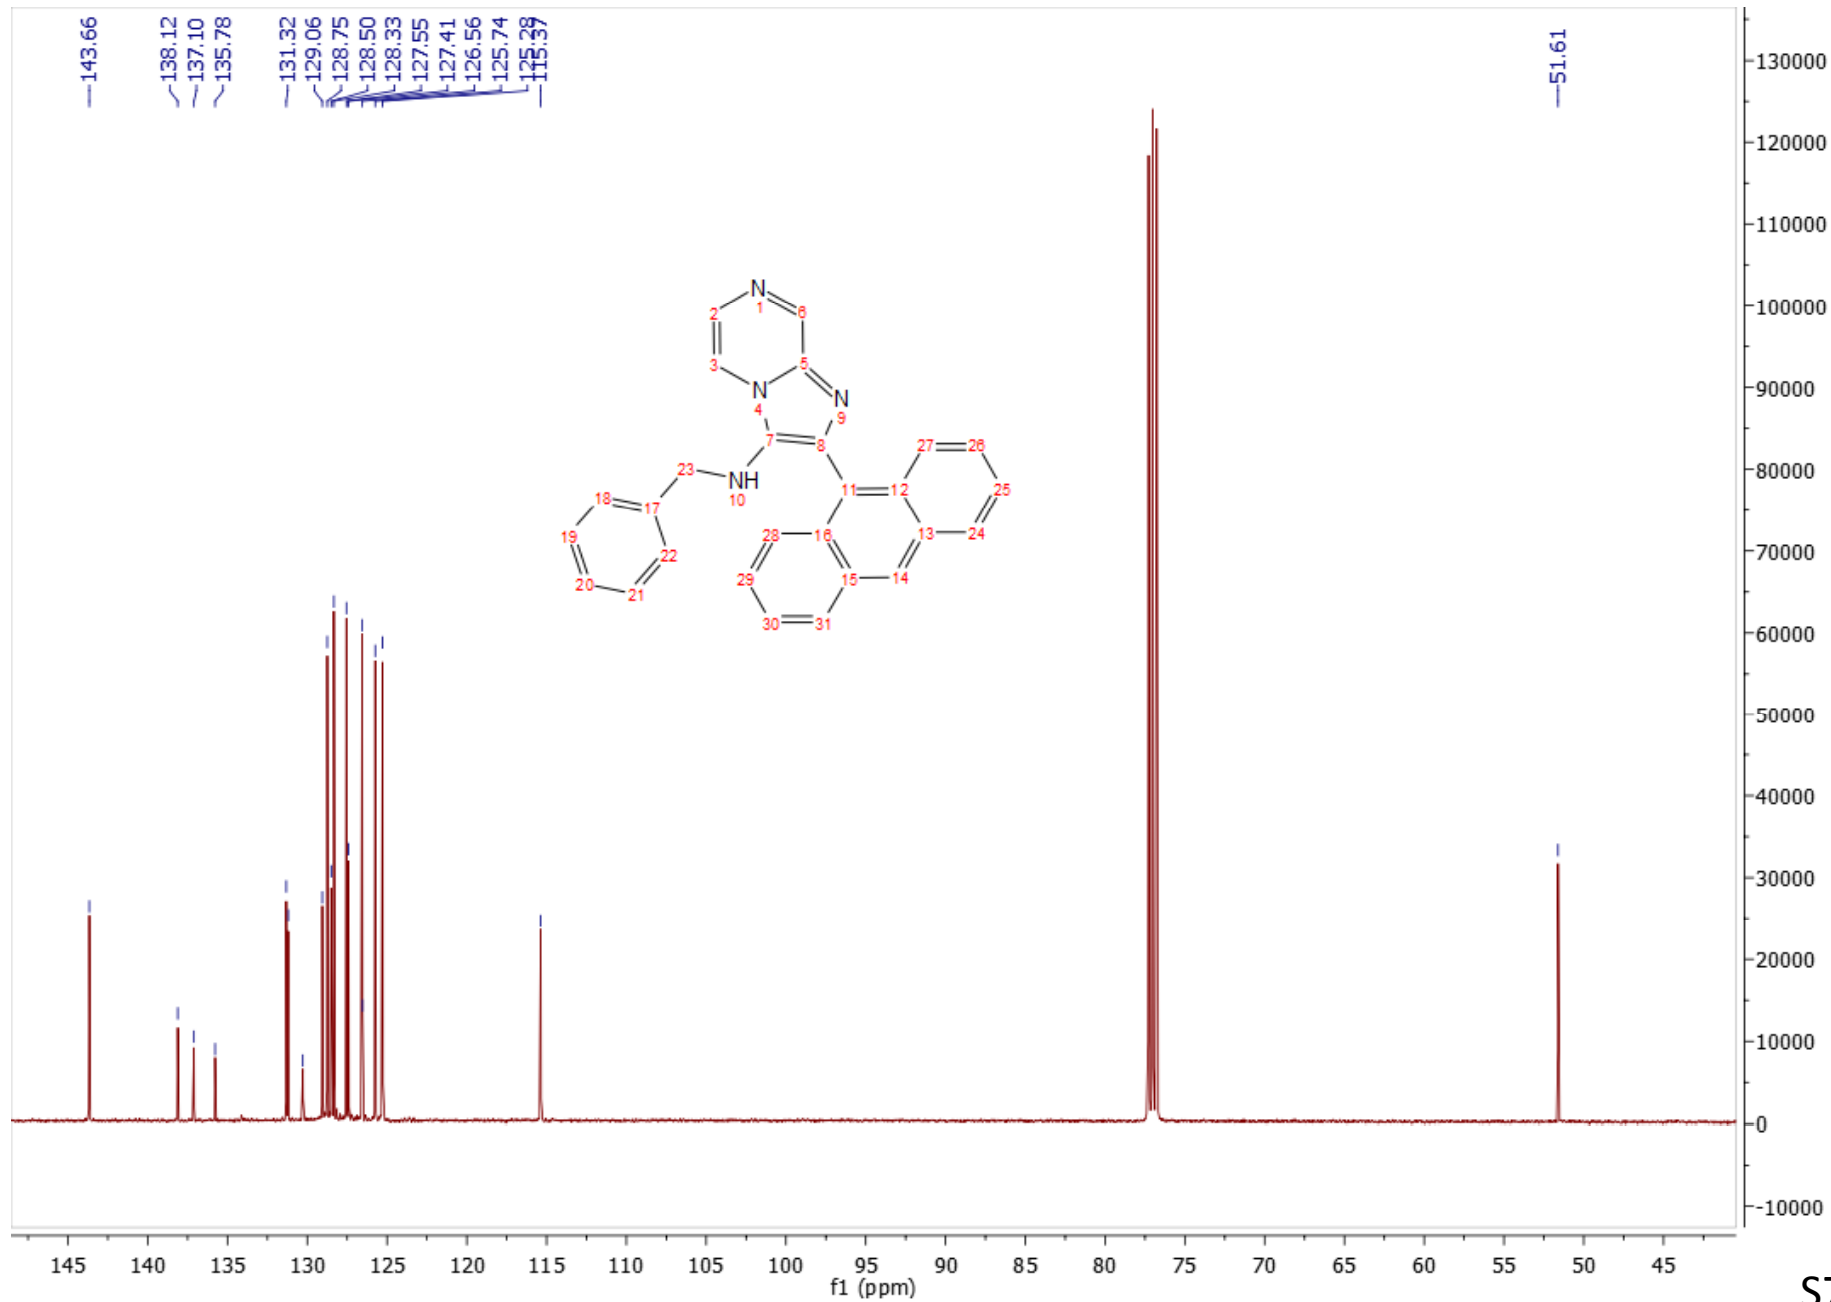



### 3h LC-MS

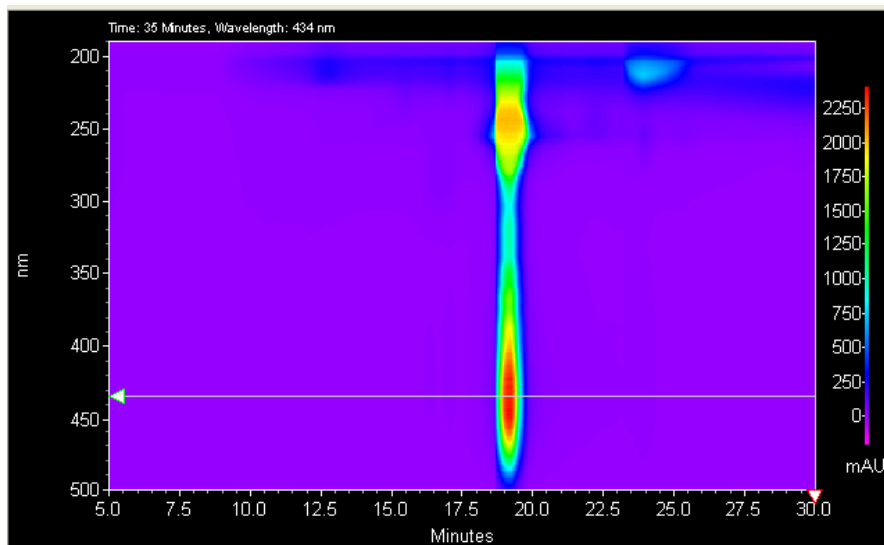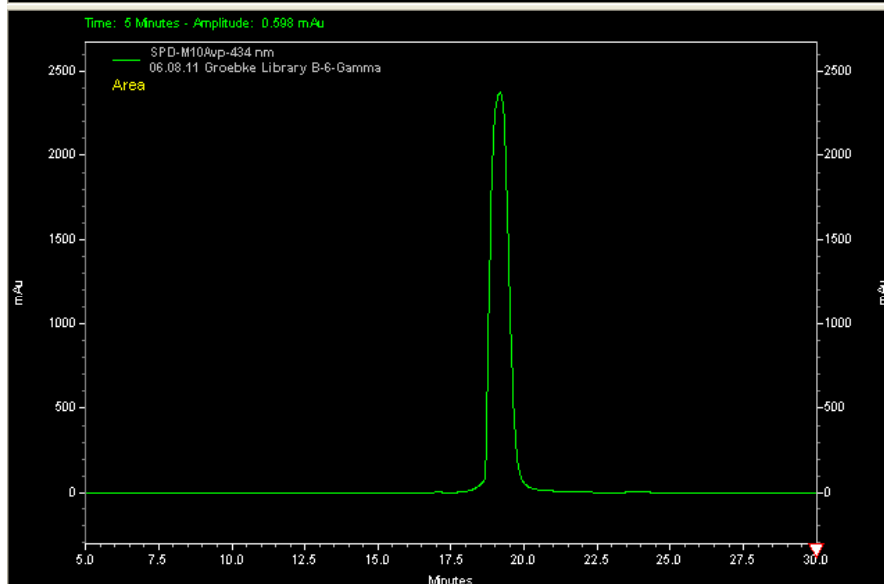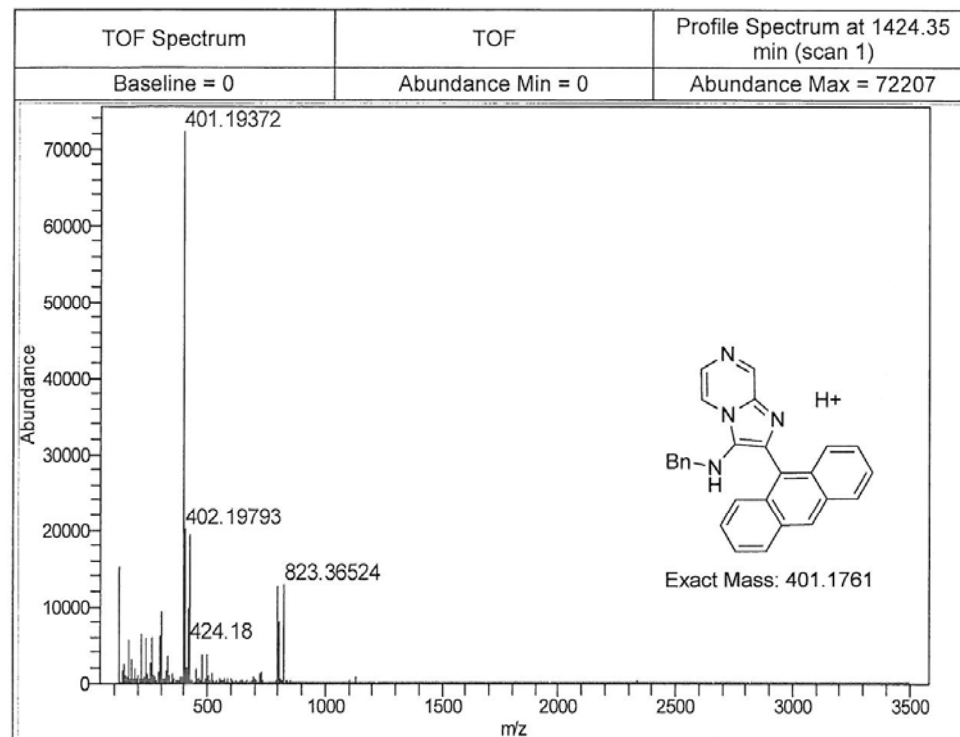

# 4a <sup>1</sup>H Spectrum

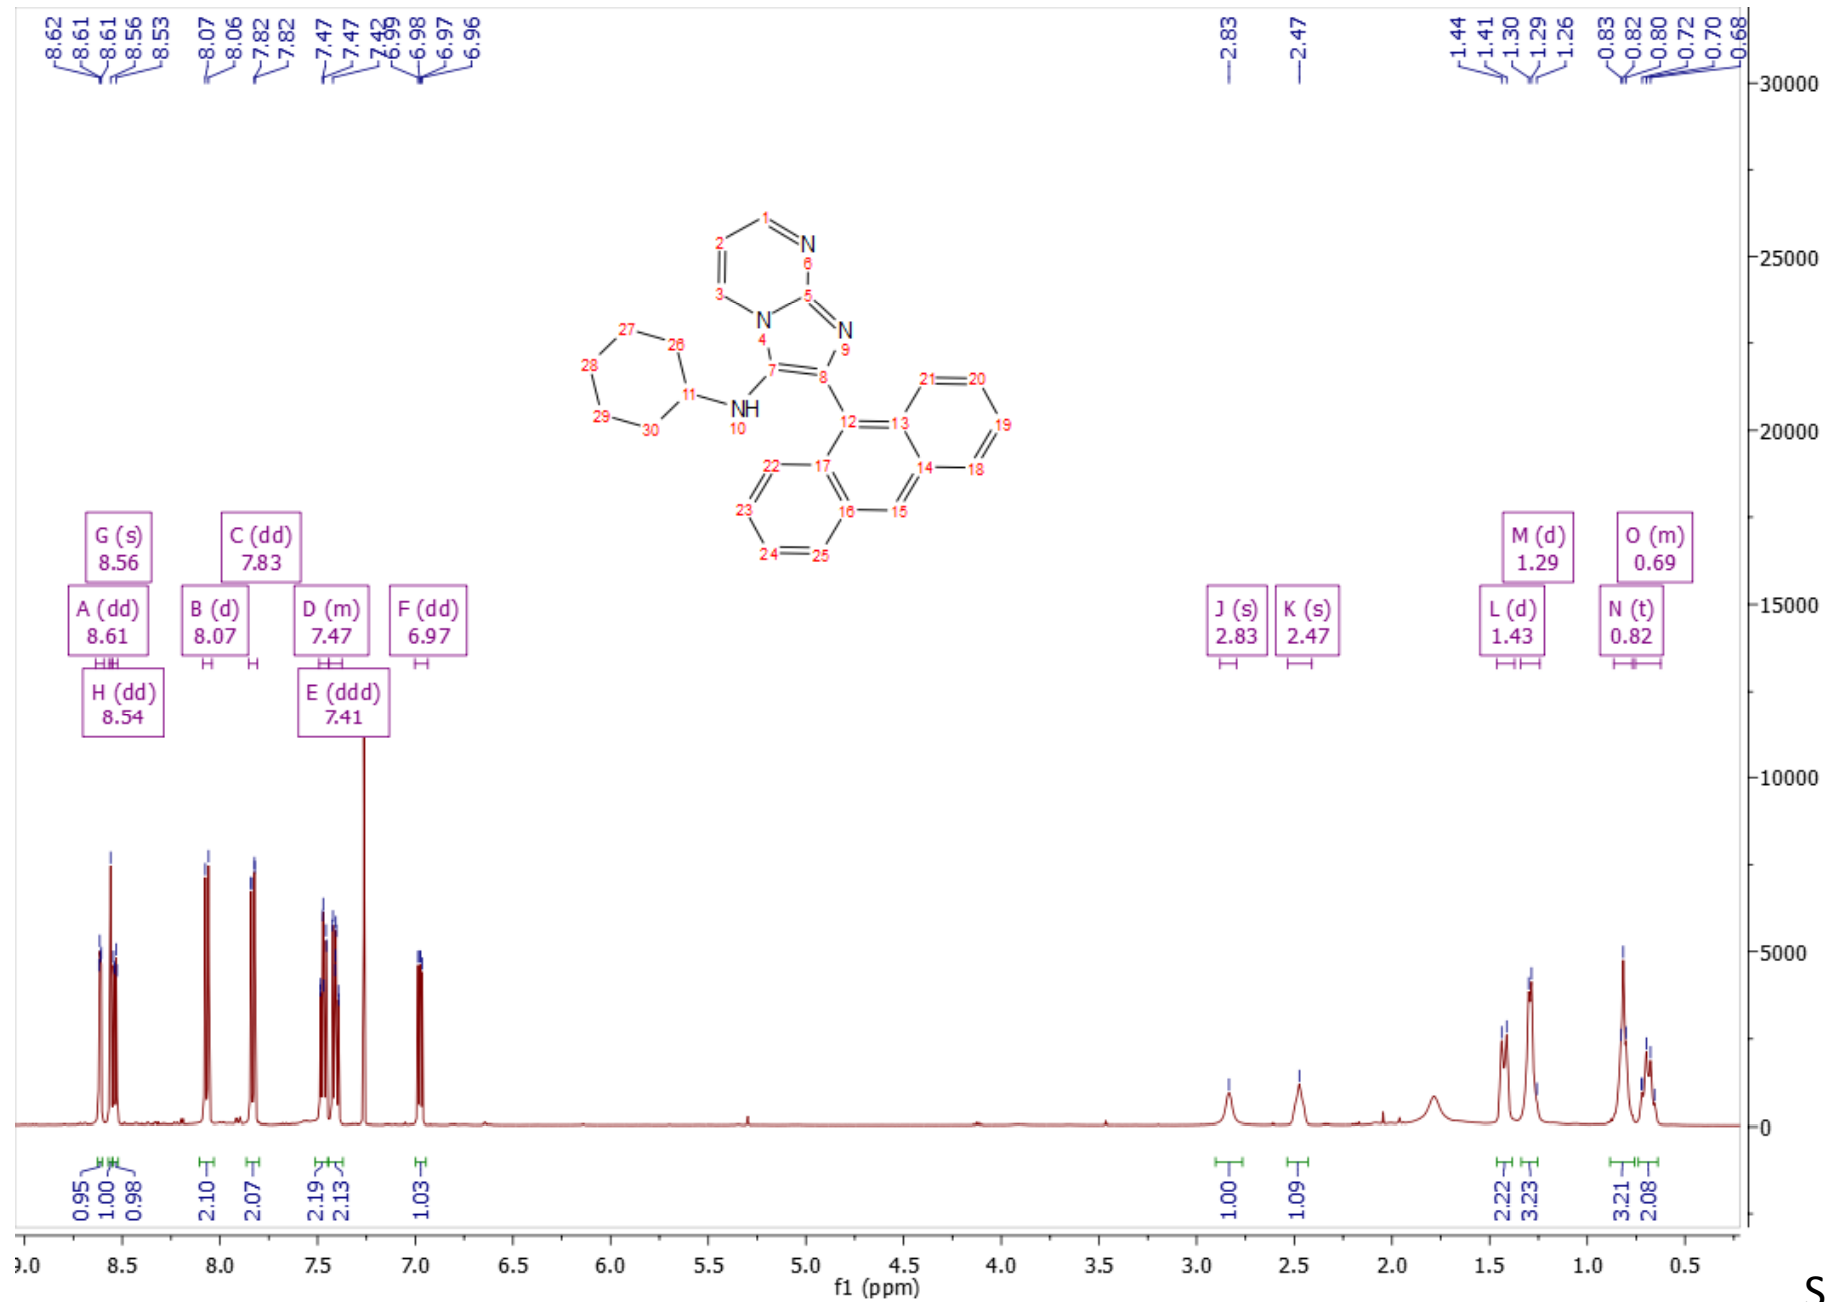

# 4a <sup>13</sup>C Spectrum

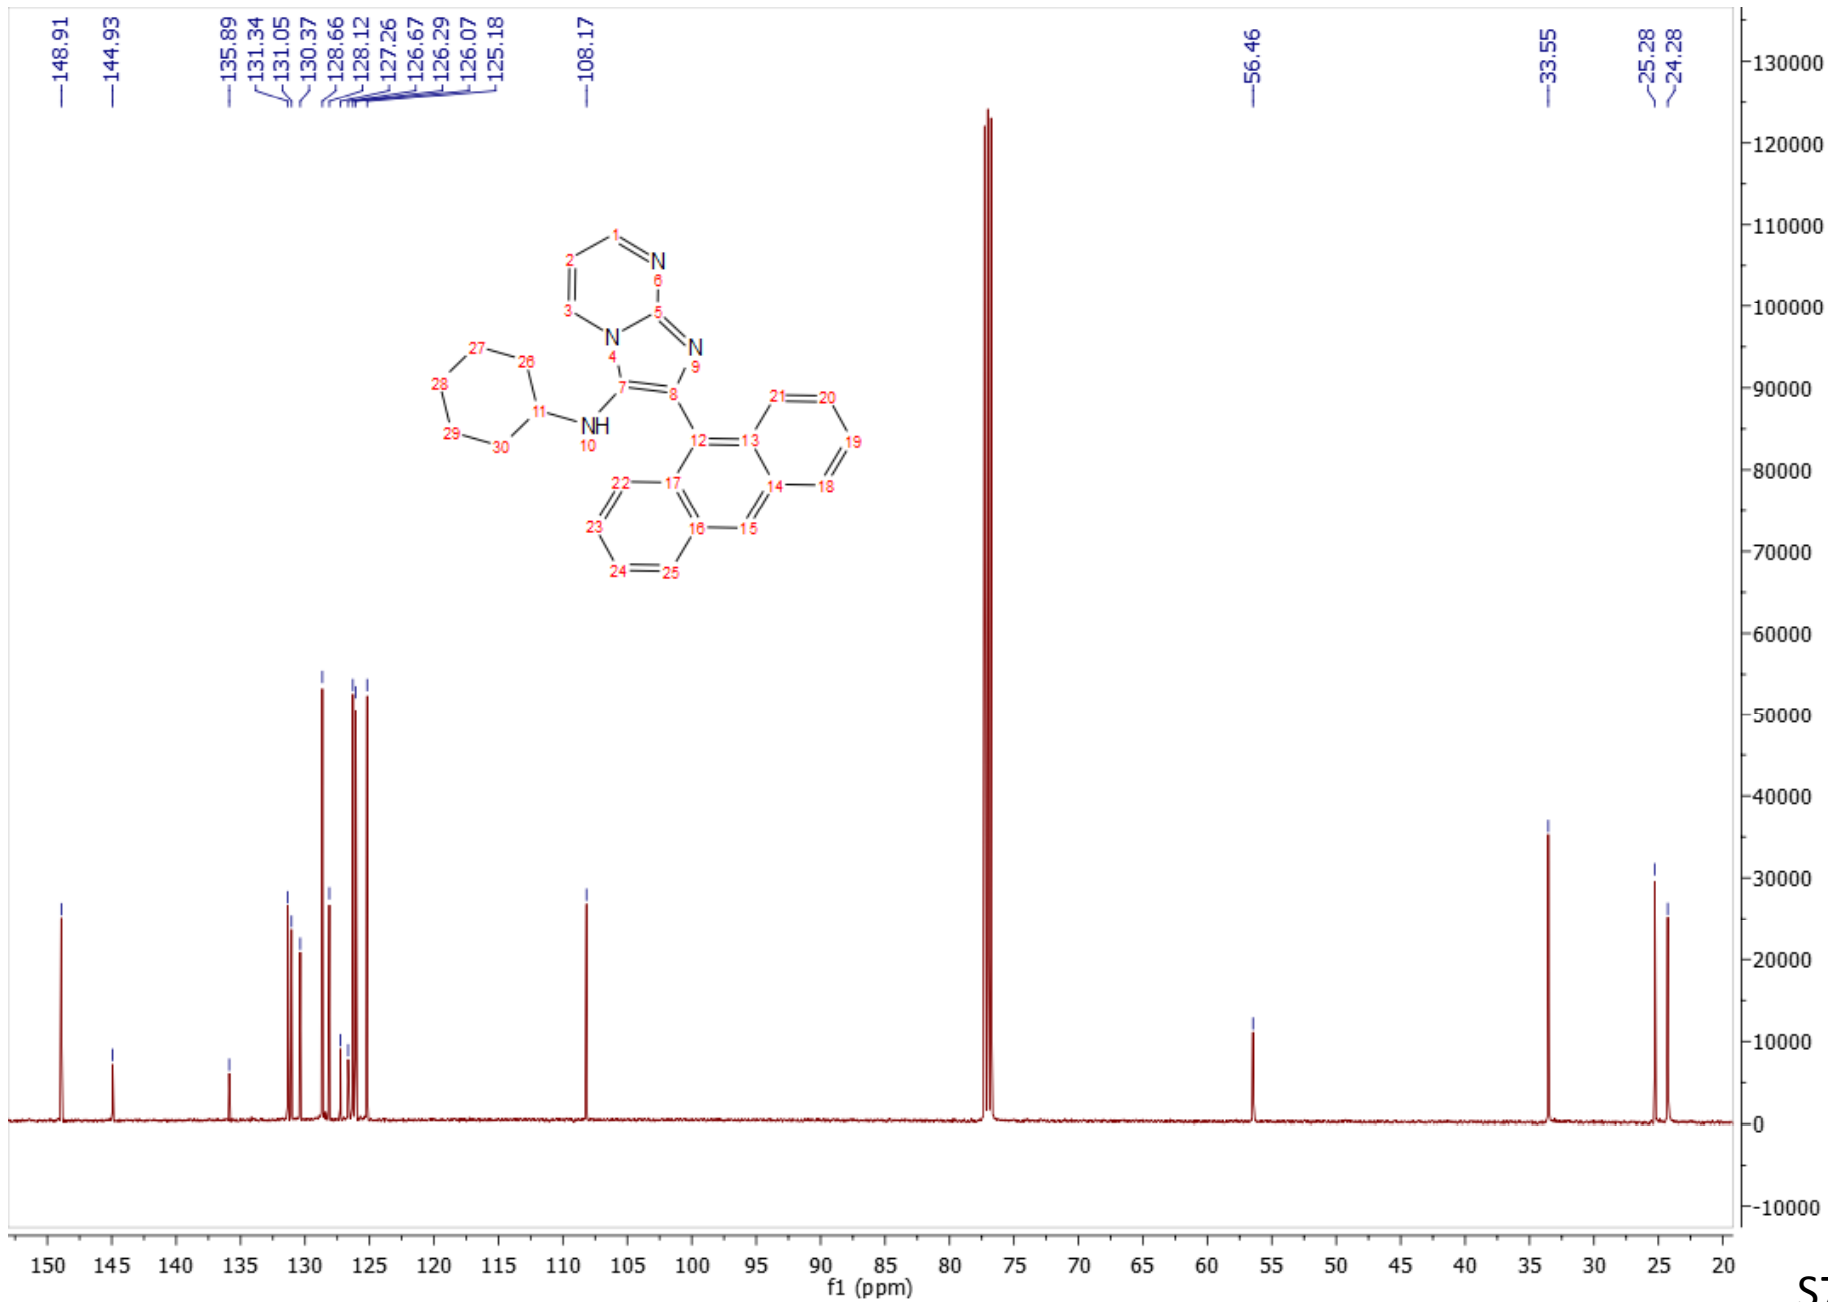

# 4a LC-MS

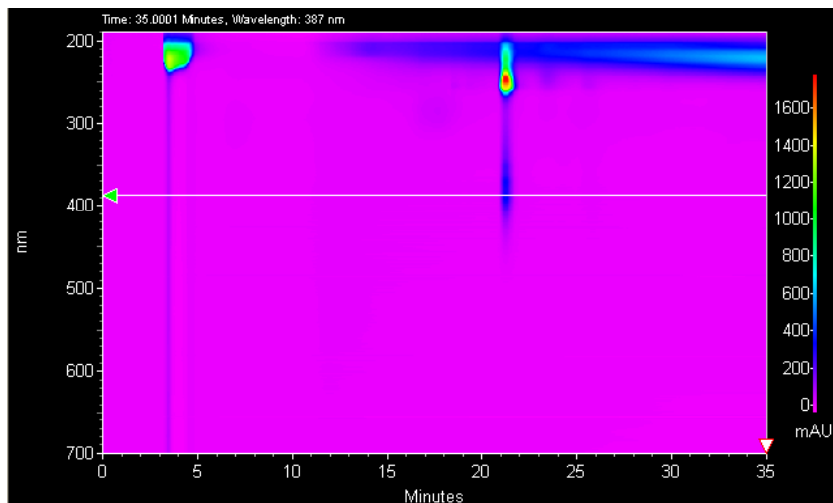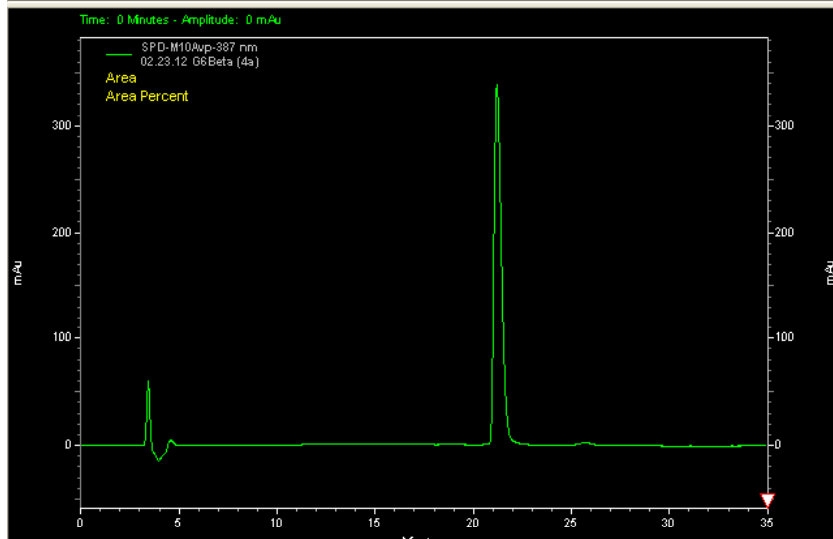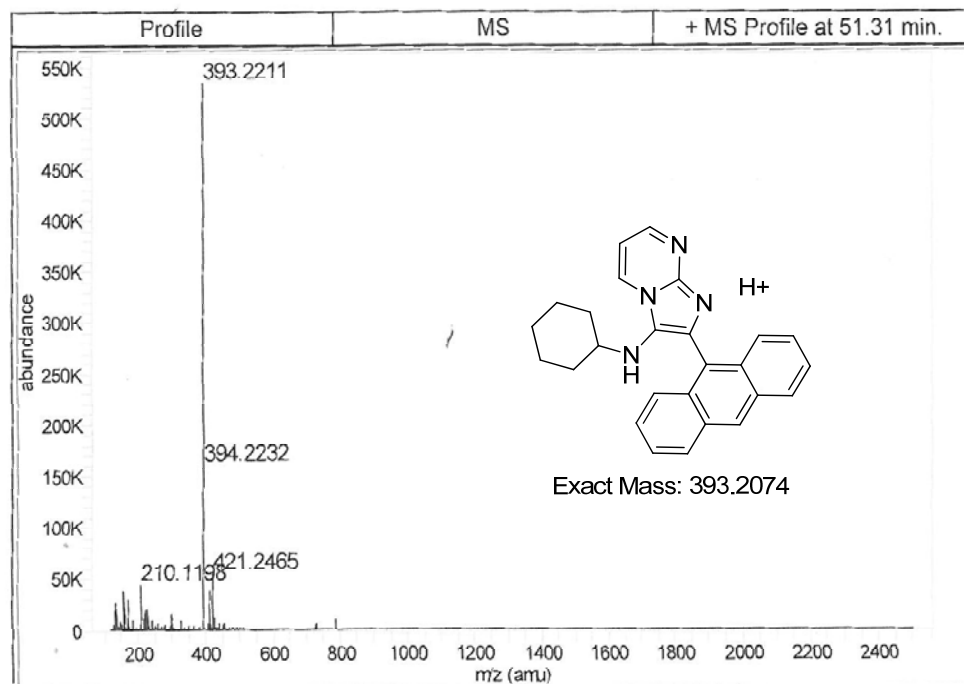

# 4b <sup>1</sup>H Spectrum

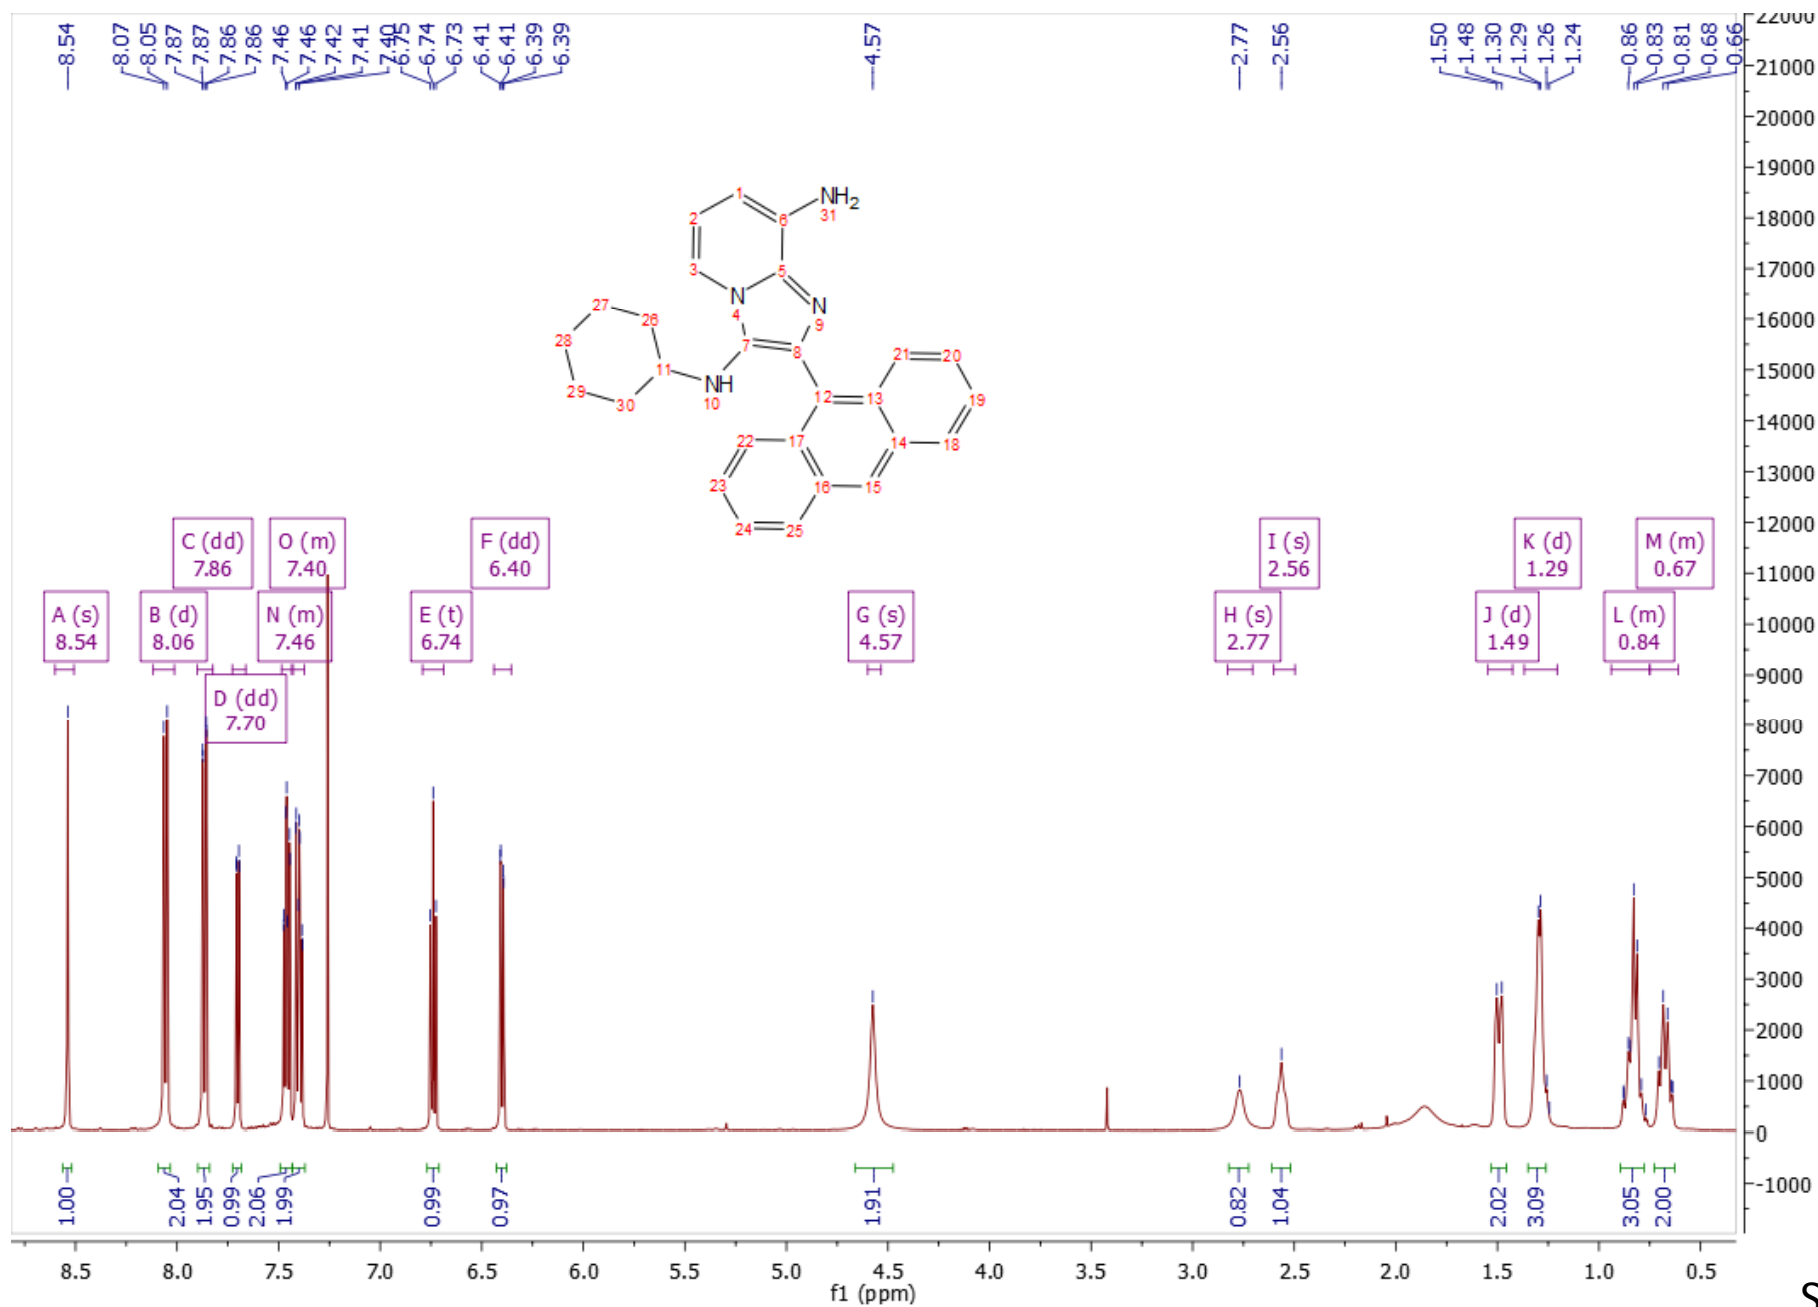

# 4b <sup>13</sup>C Spectrum

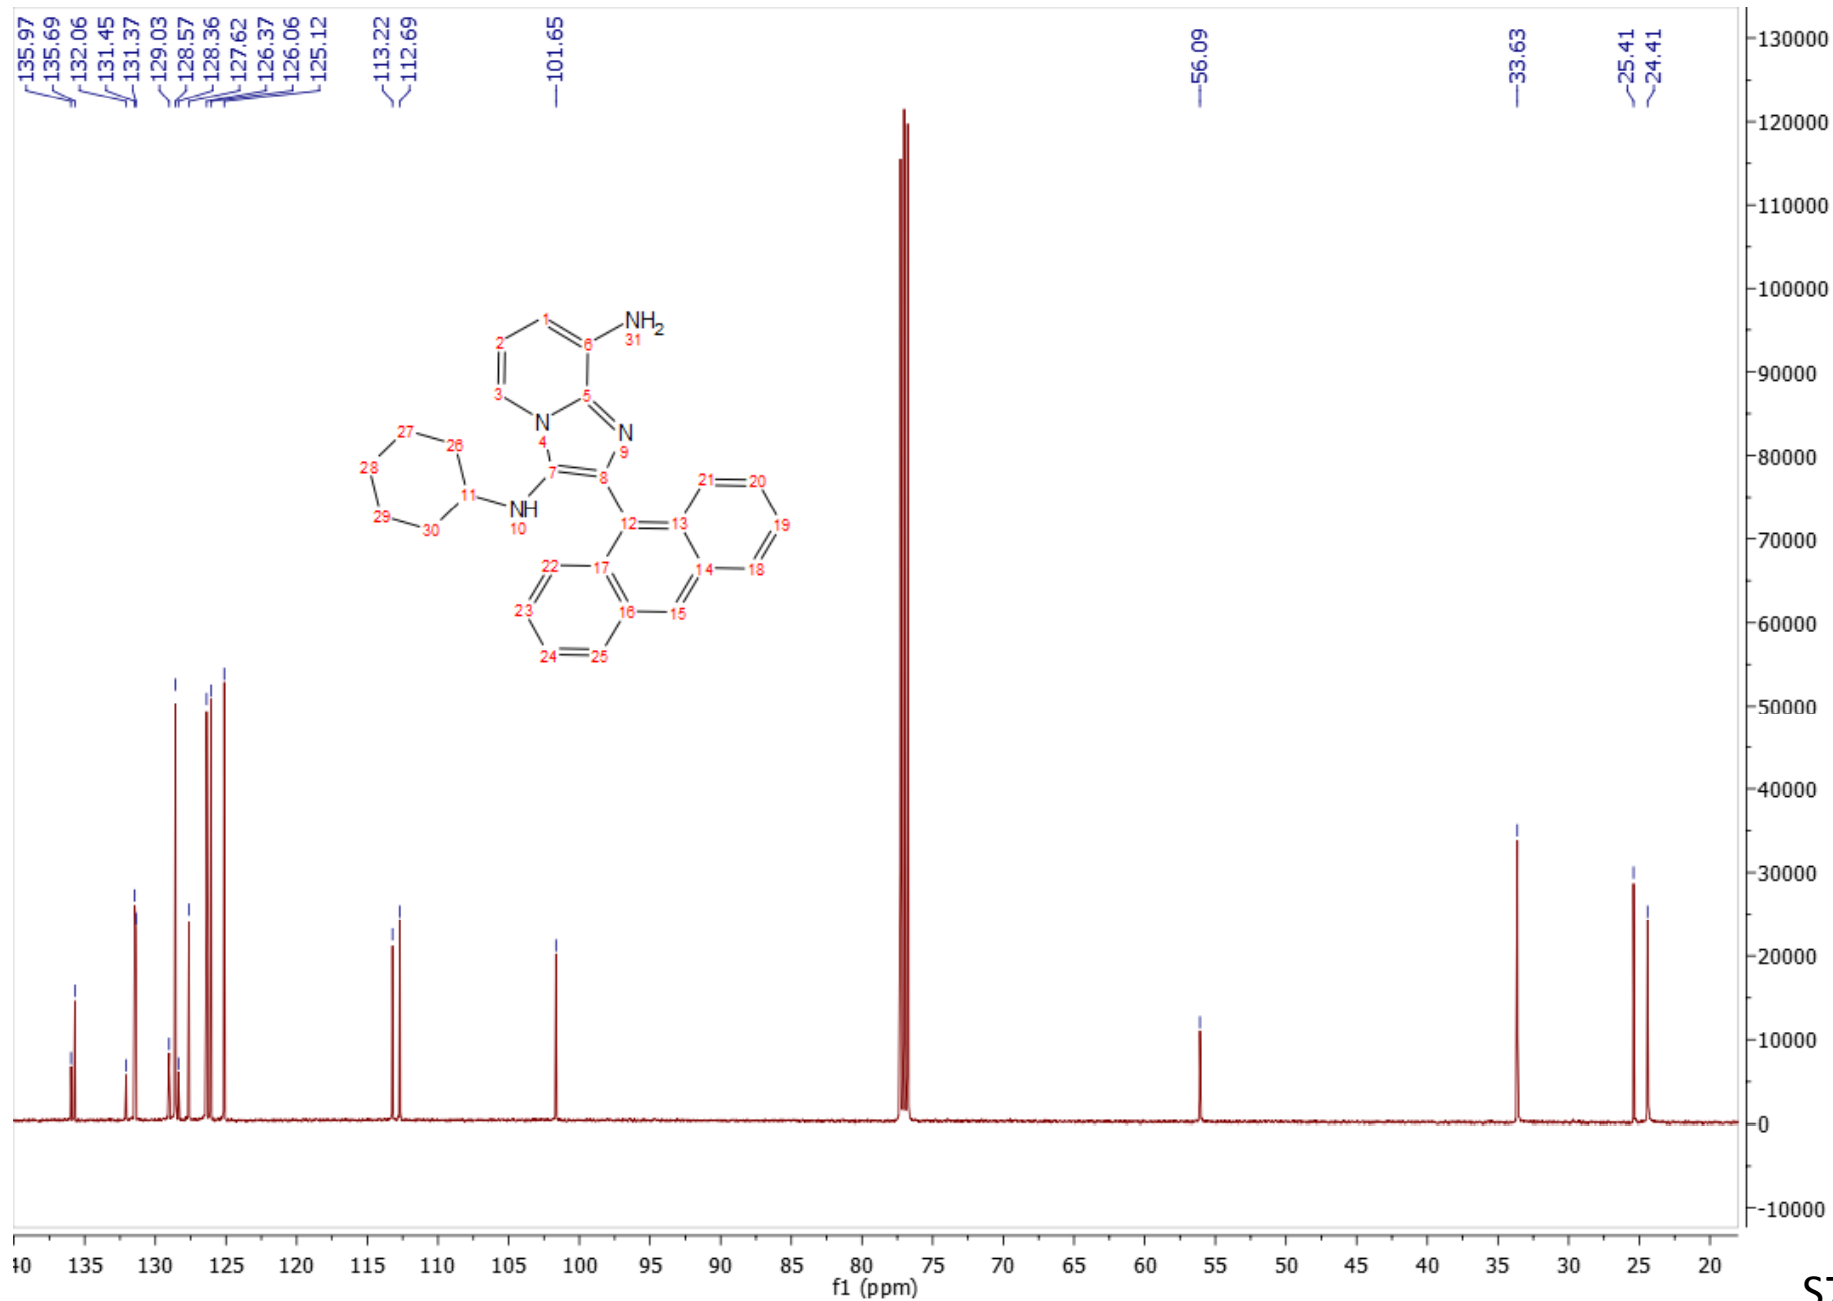

# 4b LC-MS

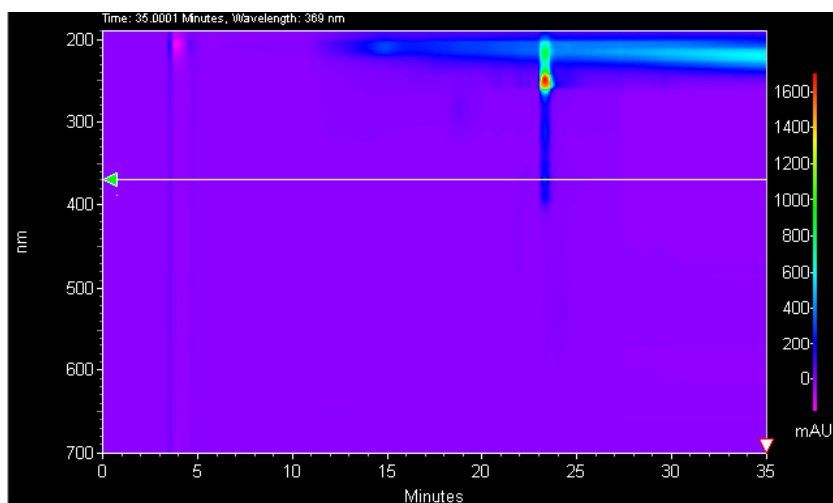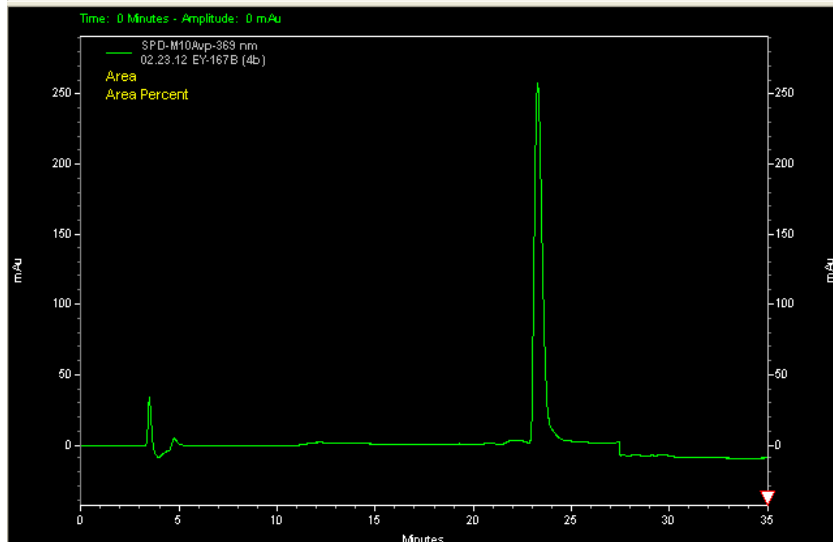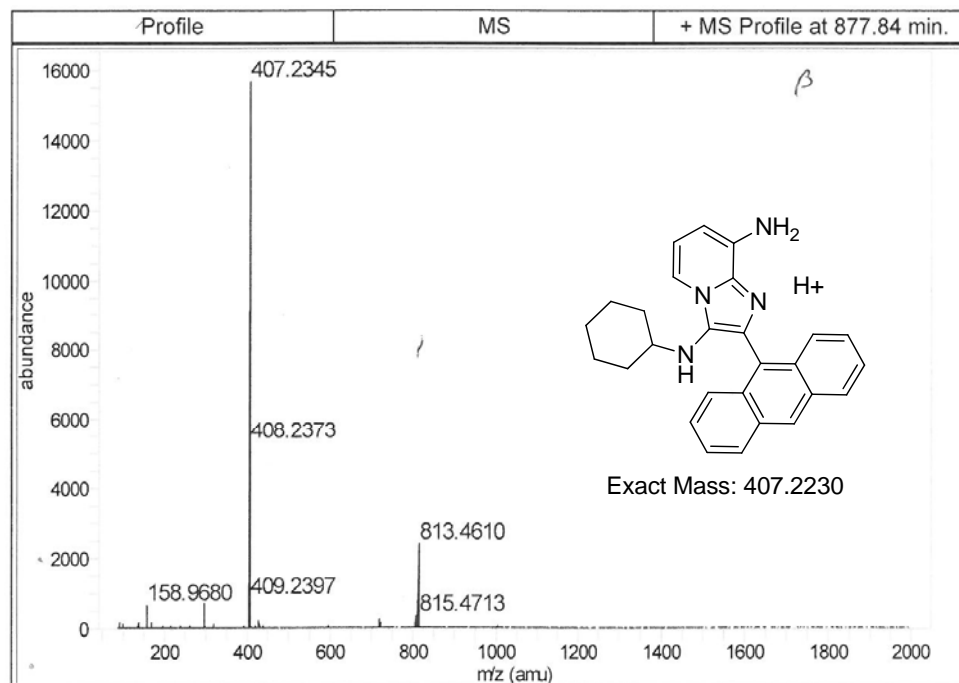

# 4c <sup>1</sup>H Spectrum

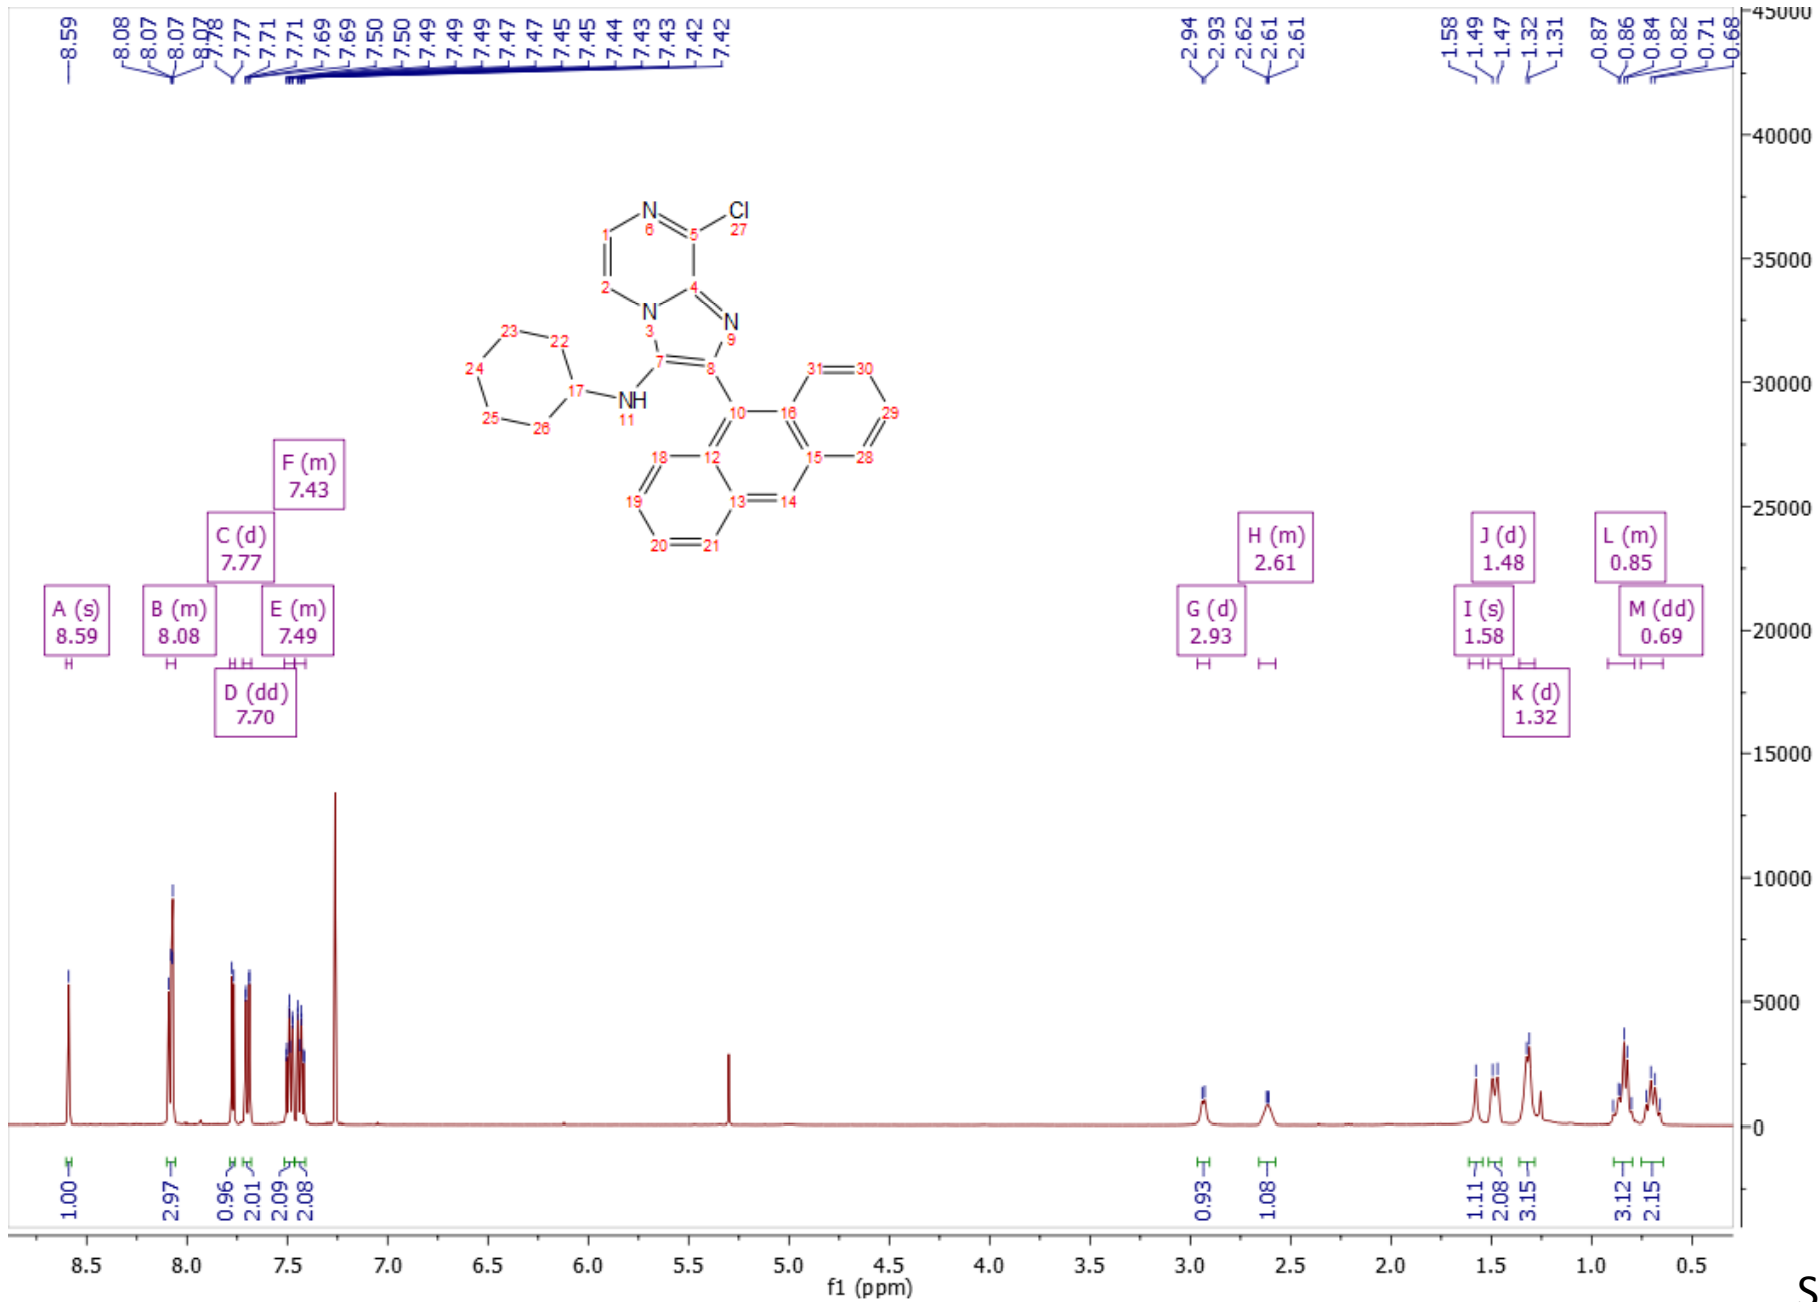



# 4c <sup>13</sup>C Spectrum

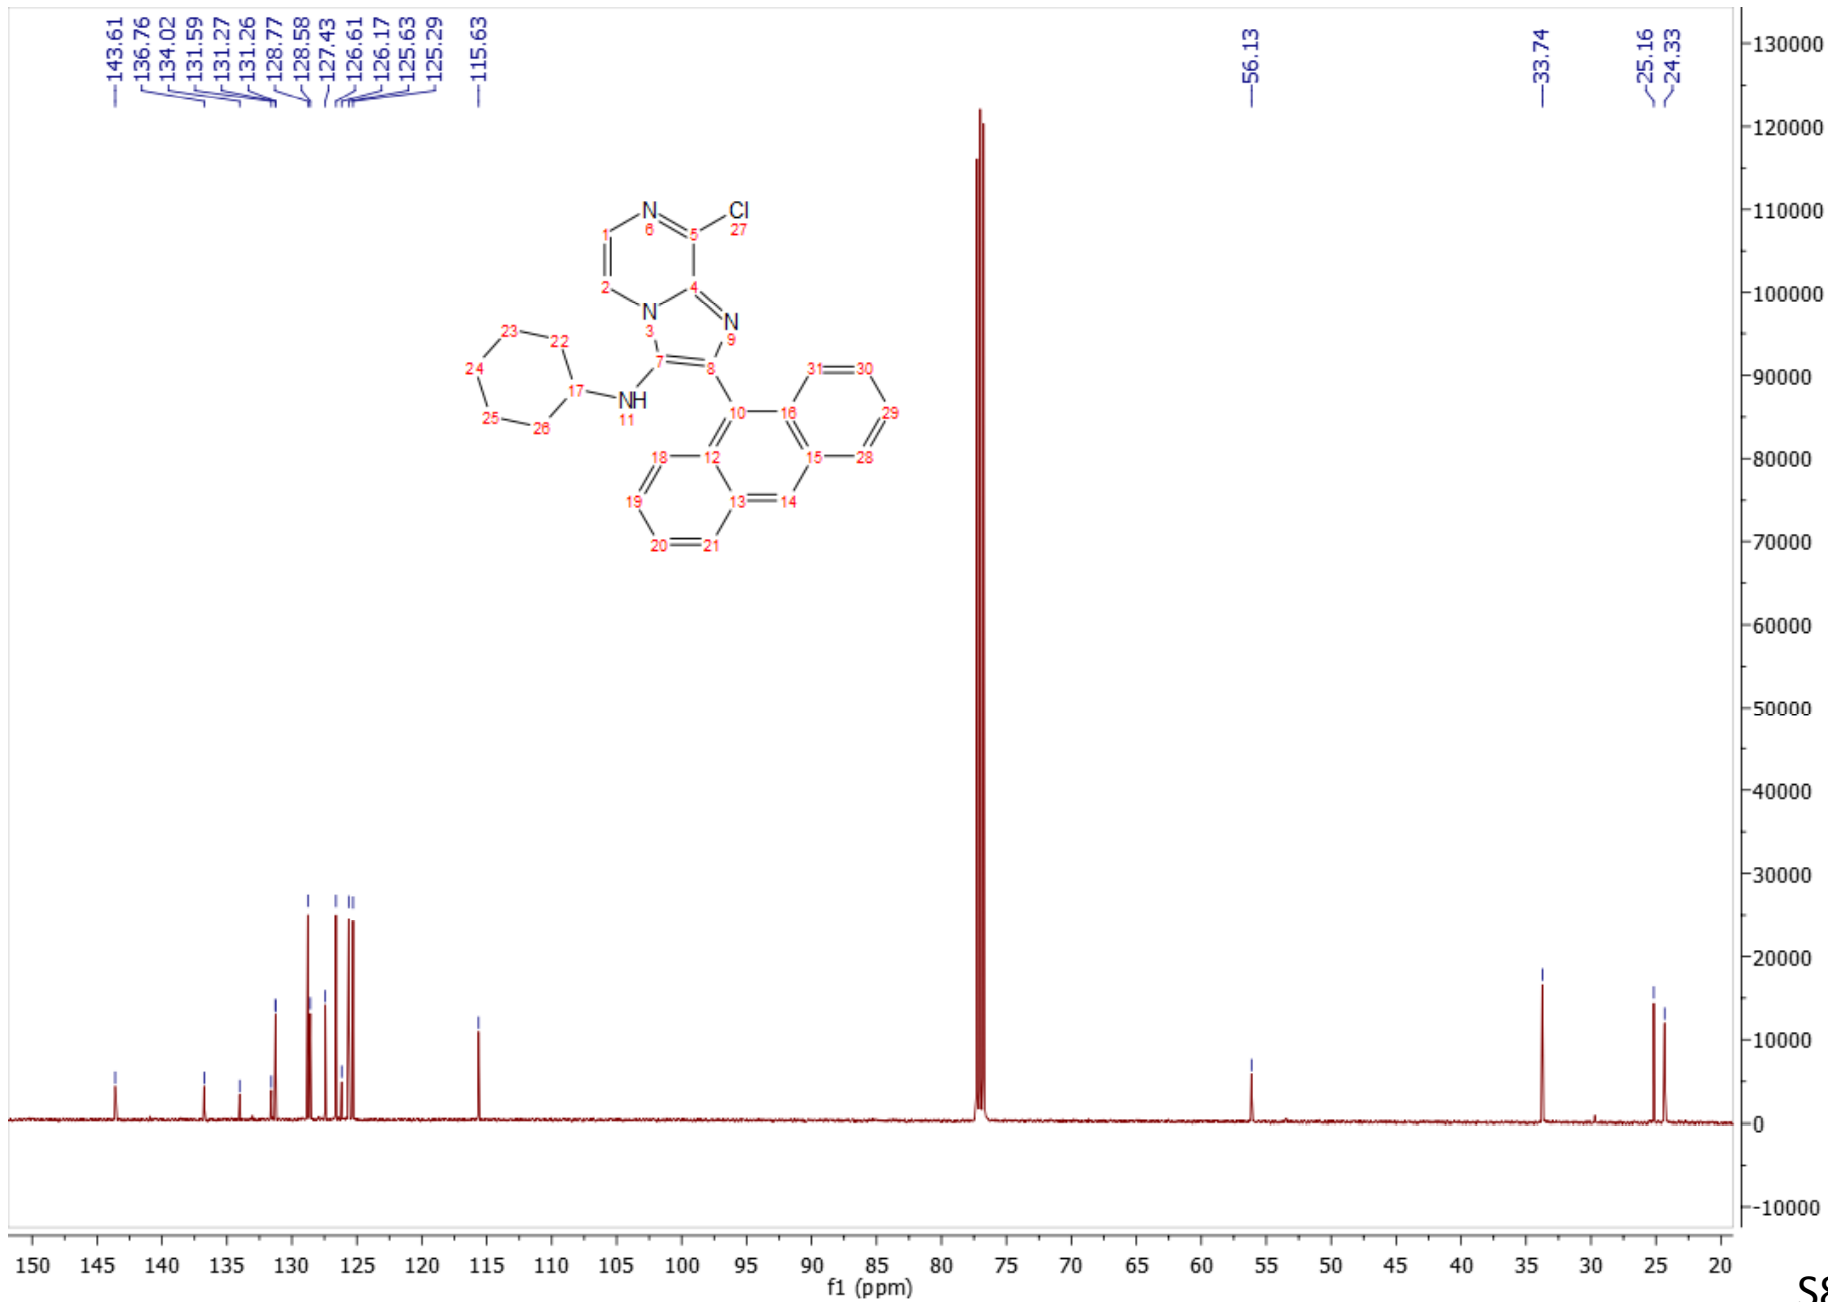

# 4c LC-MS

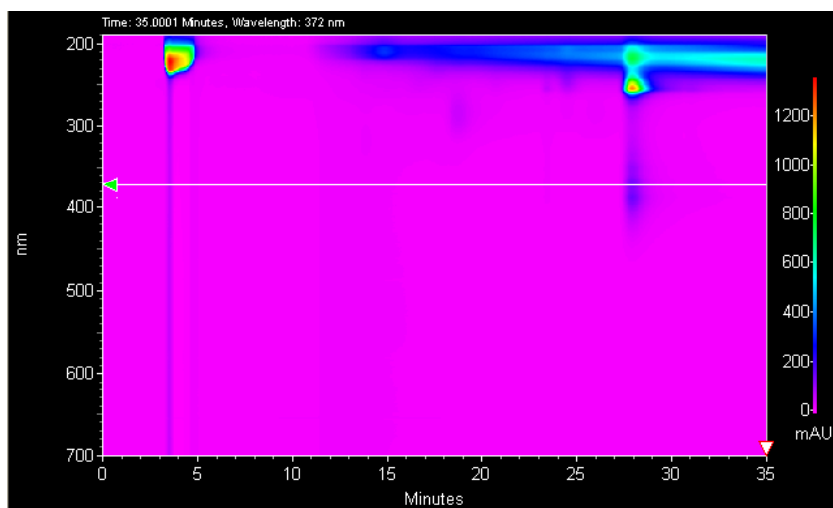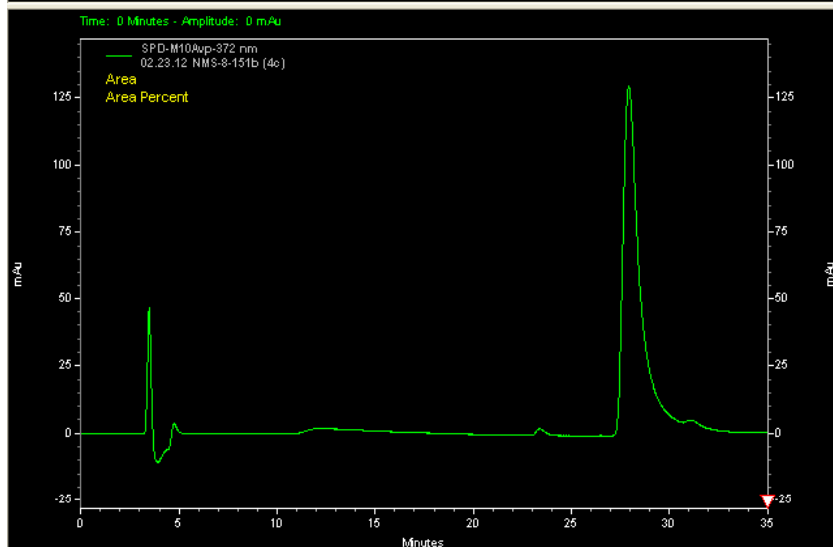

| Sample Name   | 01.18.12 nms-8-151B | Position    | Val 5               | Instrument Name | Instrument 1 | User Name              | IRM Calibration Status | Success           |
|---------------|---------------------|-------------|---------------------|-----------------|--------------|------------------------|------------------------|-------------------|
| Dq/Vol        | -1                  | Dq/Position |                     | SampleType      | Sample       | IRM Calibration Status |                        | 1/18/2012 6:29:42 |
| Data Filename | 01.18.12 nms-8-151B | ACQ Method  | Watz-ACI Infusion M | Comment         |              | Acquired Time          |                        |                   |

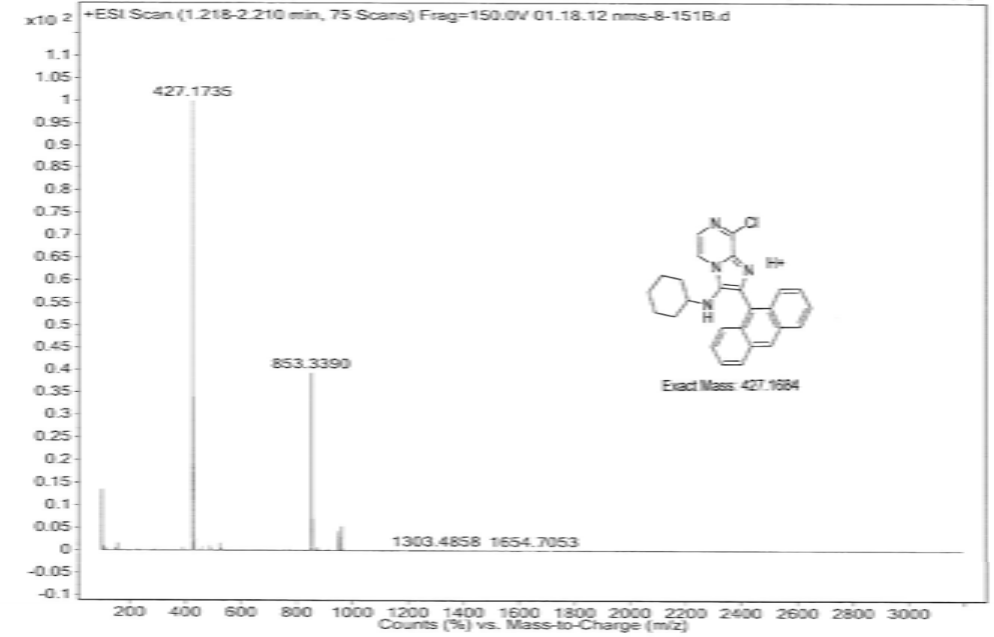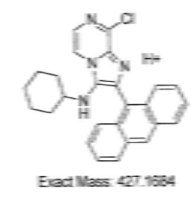

# 5a <sup>1</sup>H Spectrum

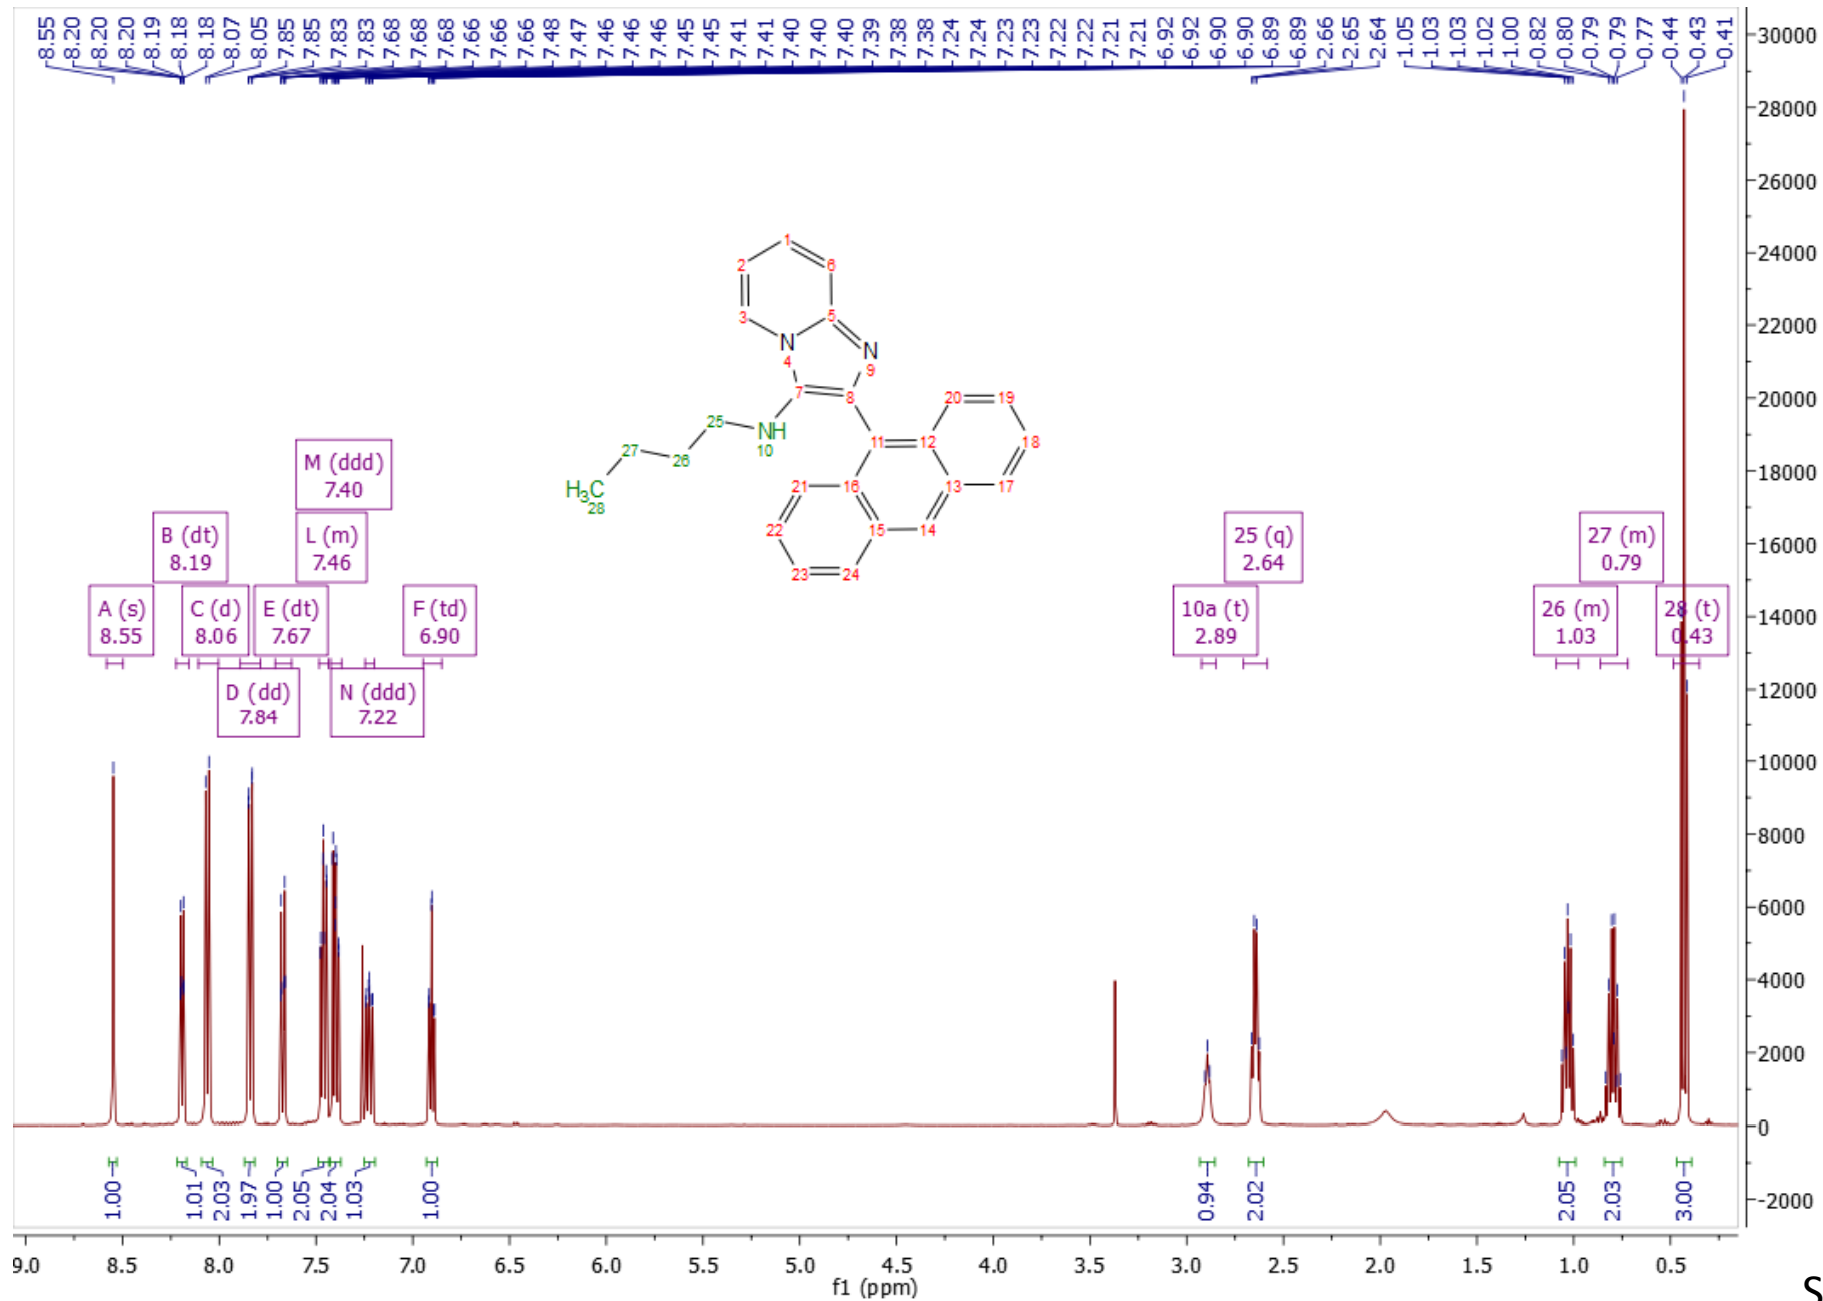

# 5a <sup>13</sup>C Spectrum

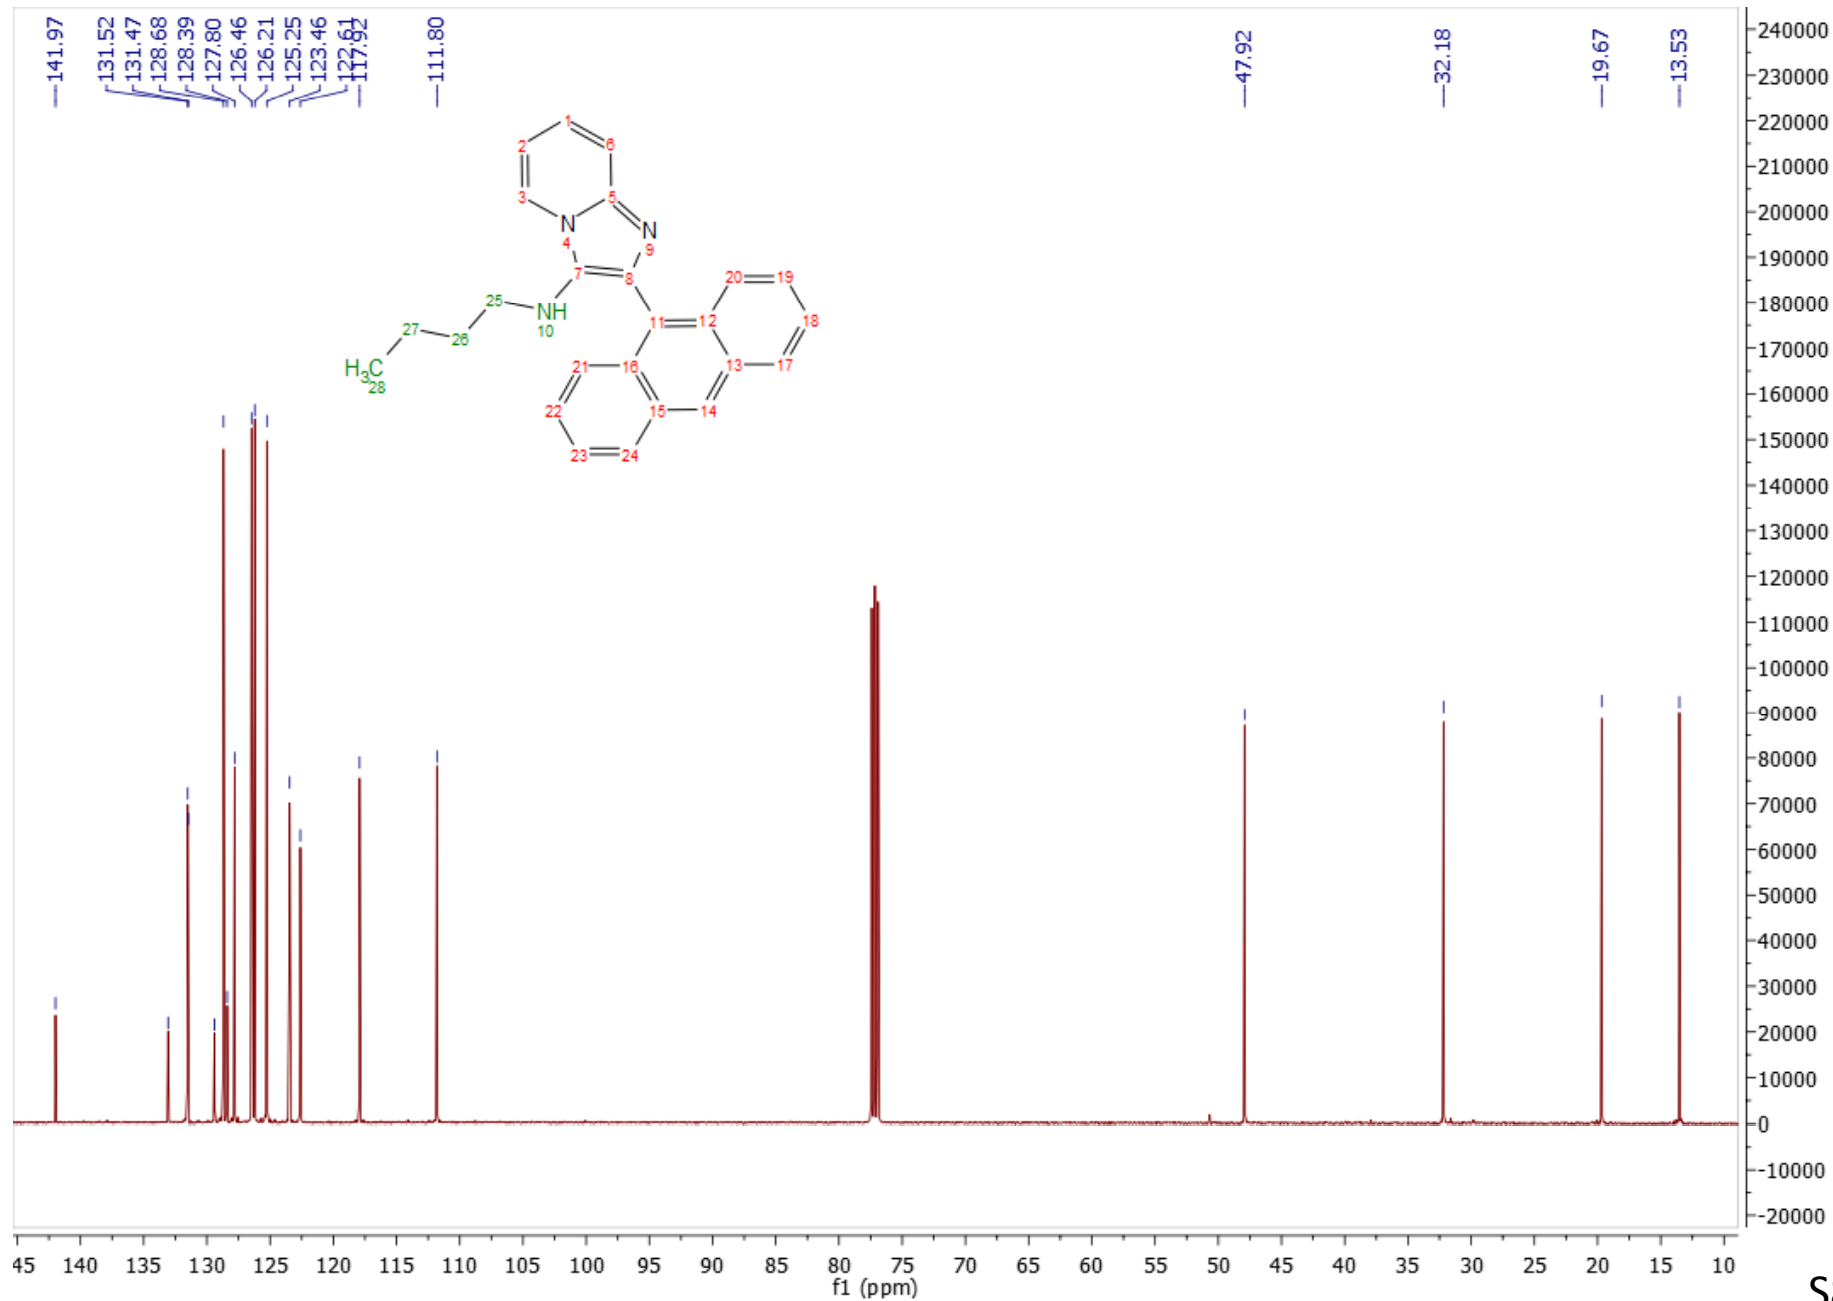

# 5a LC-MS

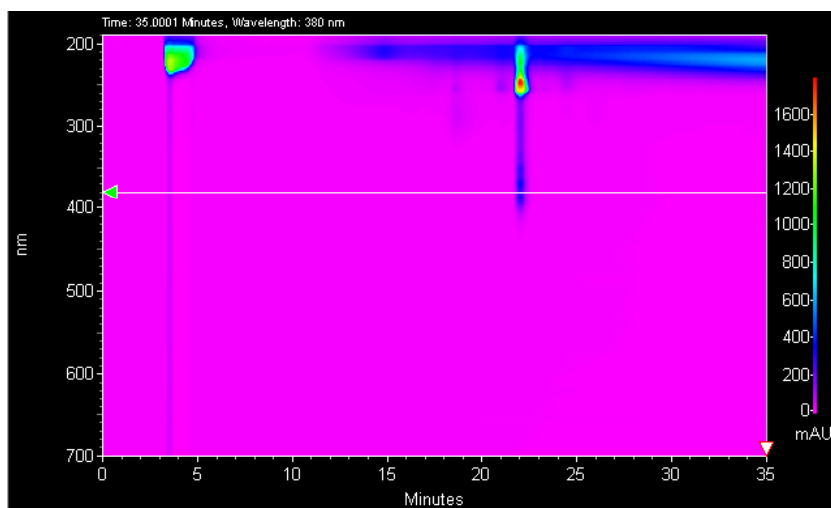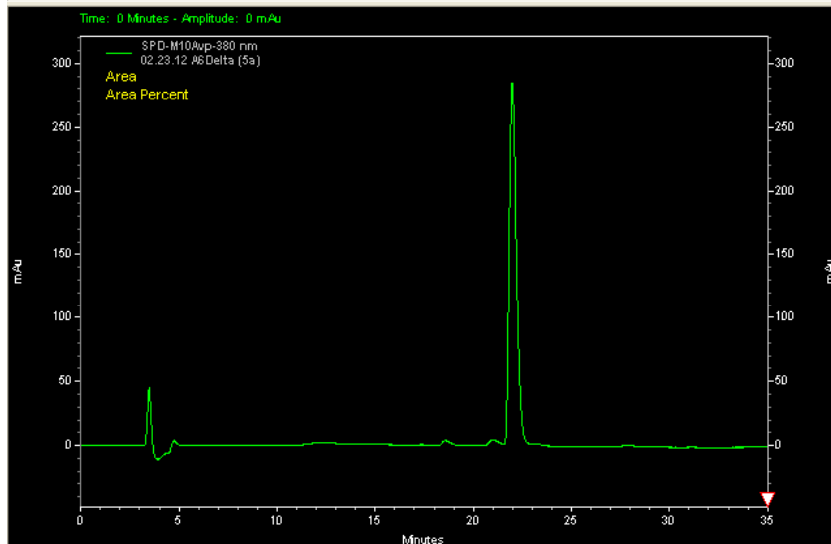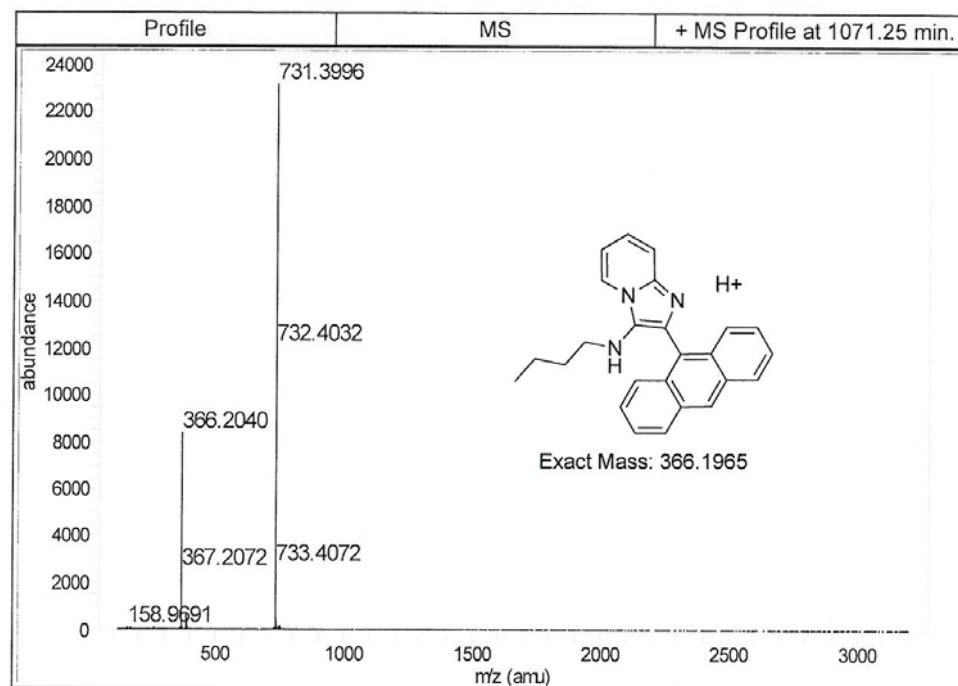

# 5b <sup>1</sup>H Spectrum

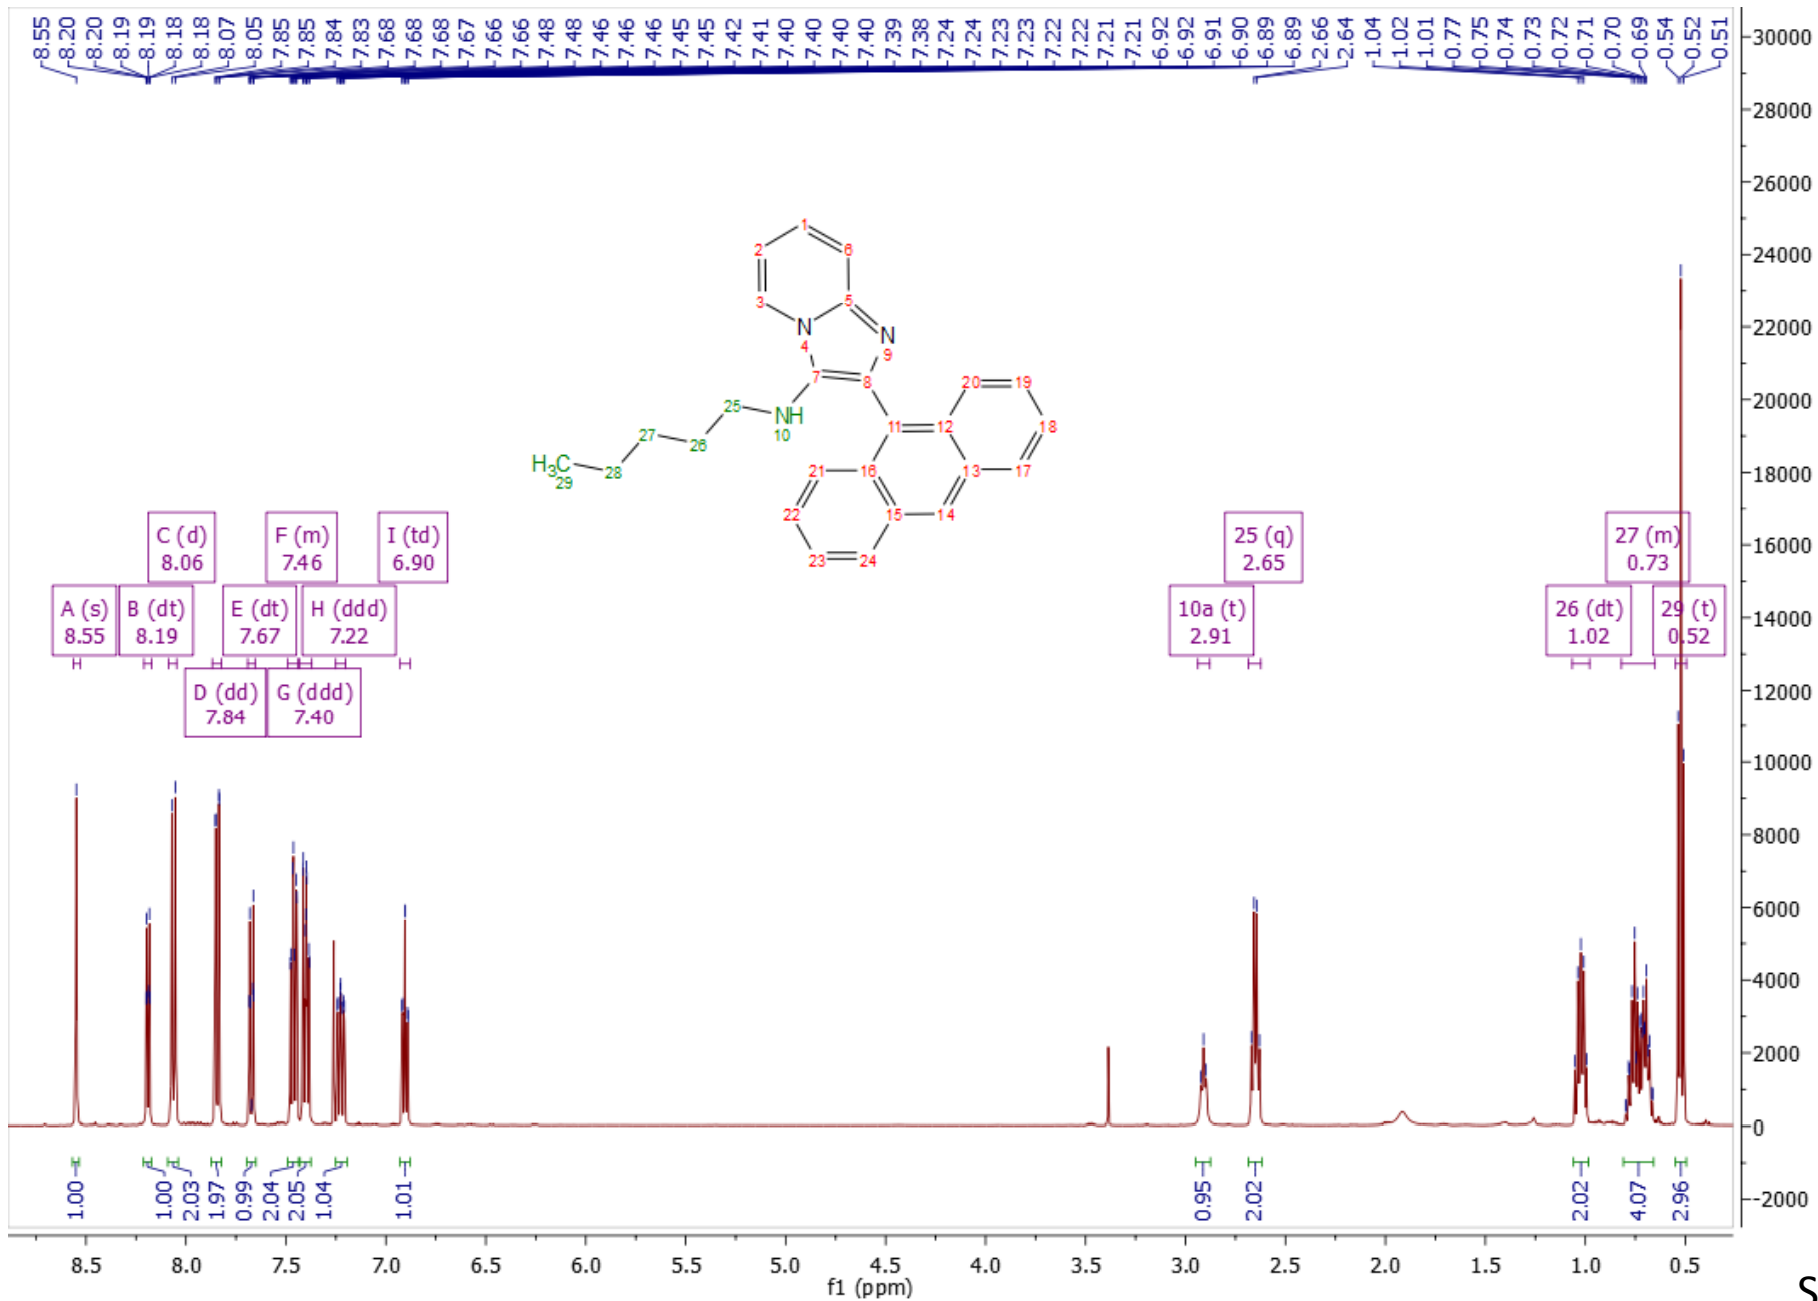

# 5b <sup>13</sup>C Spectrum

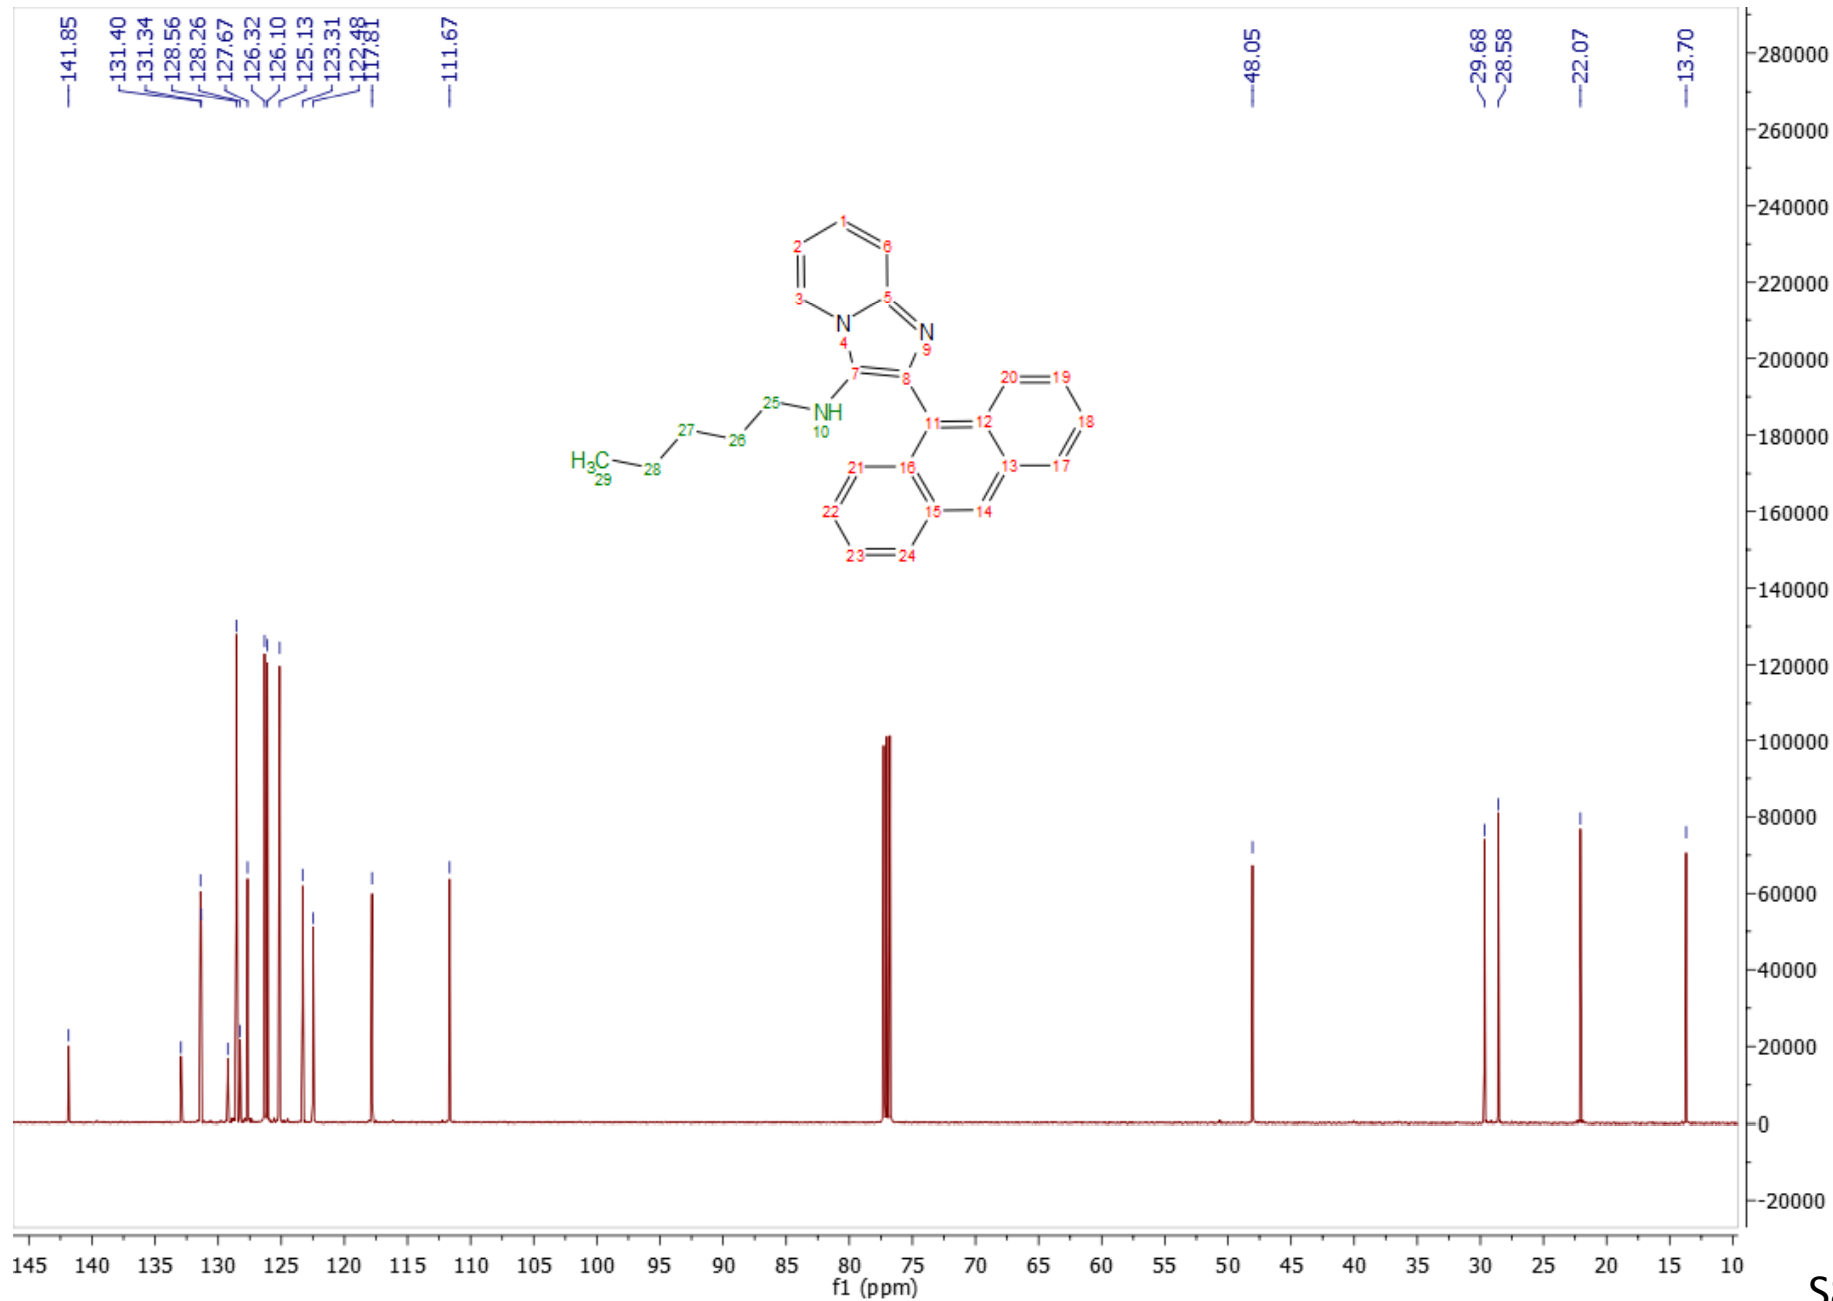

# 5b LC-MS

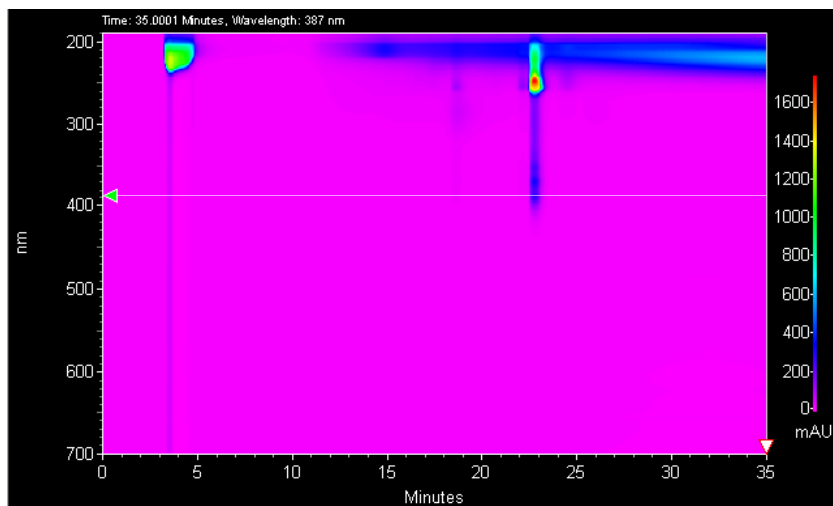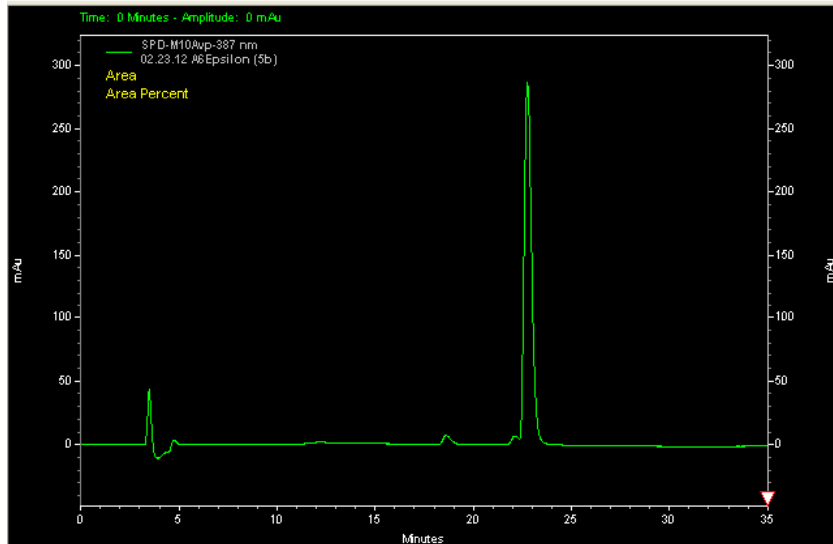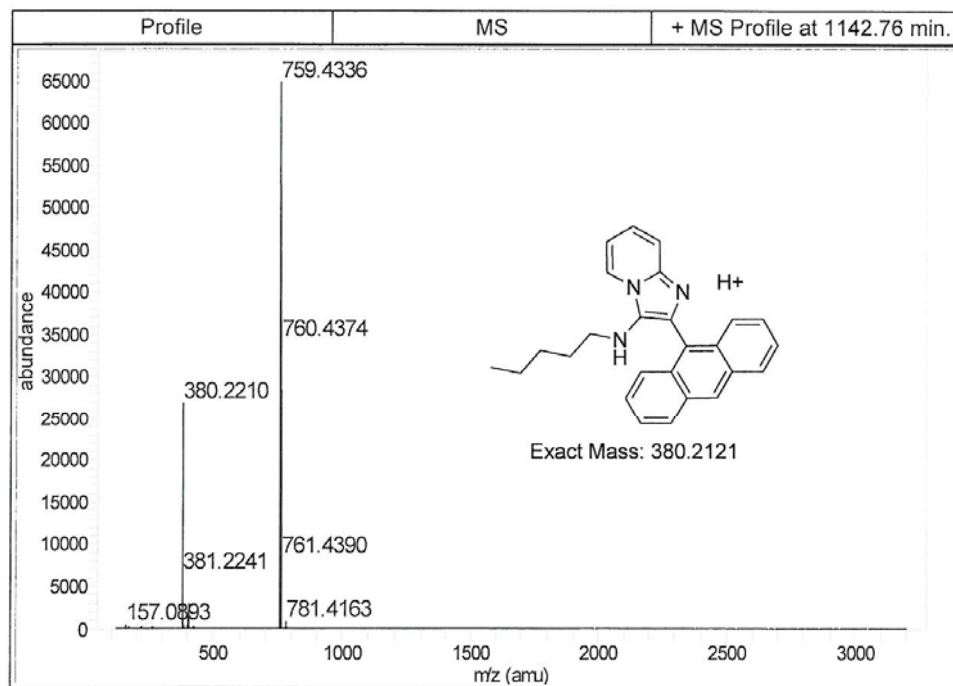



# 5c <sup>1</sup>H Spectrum

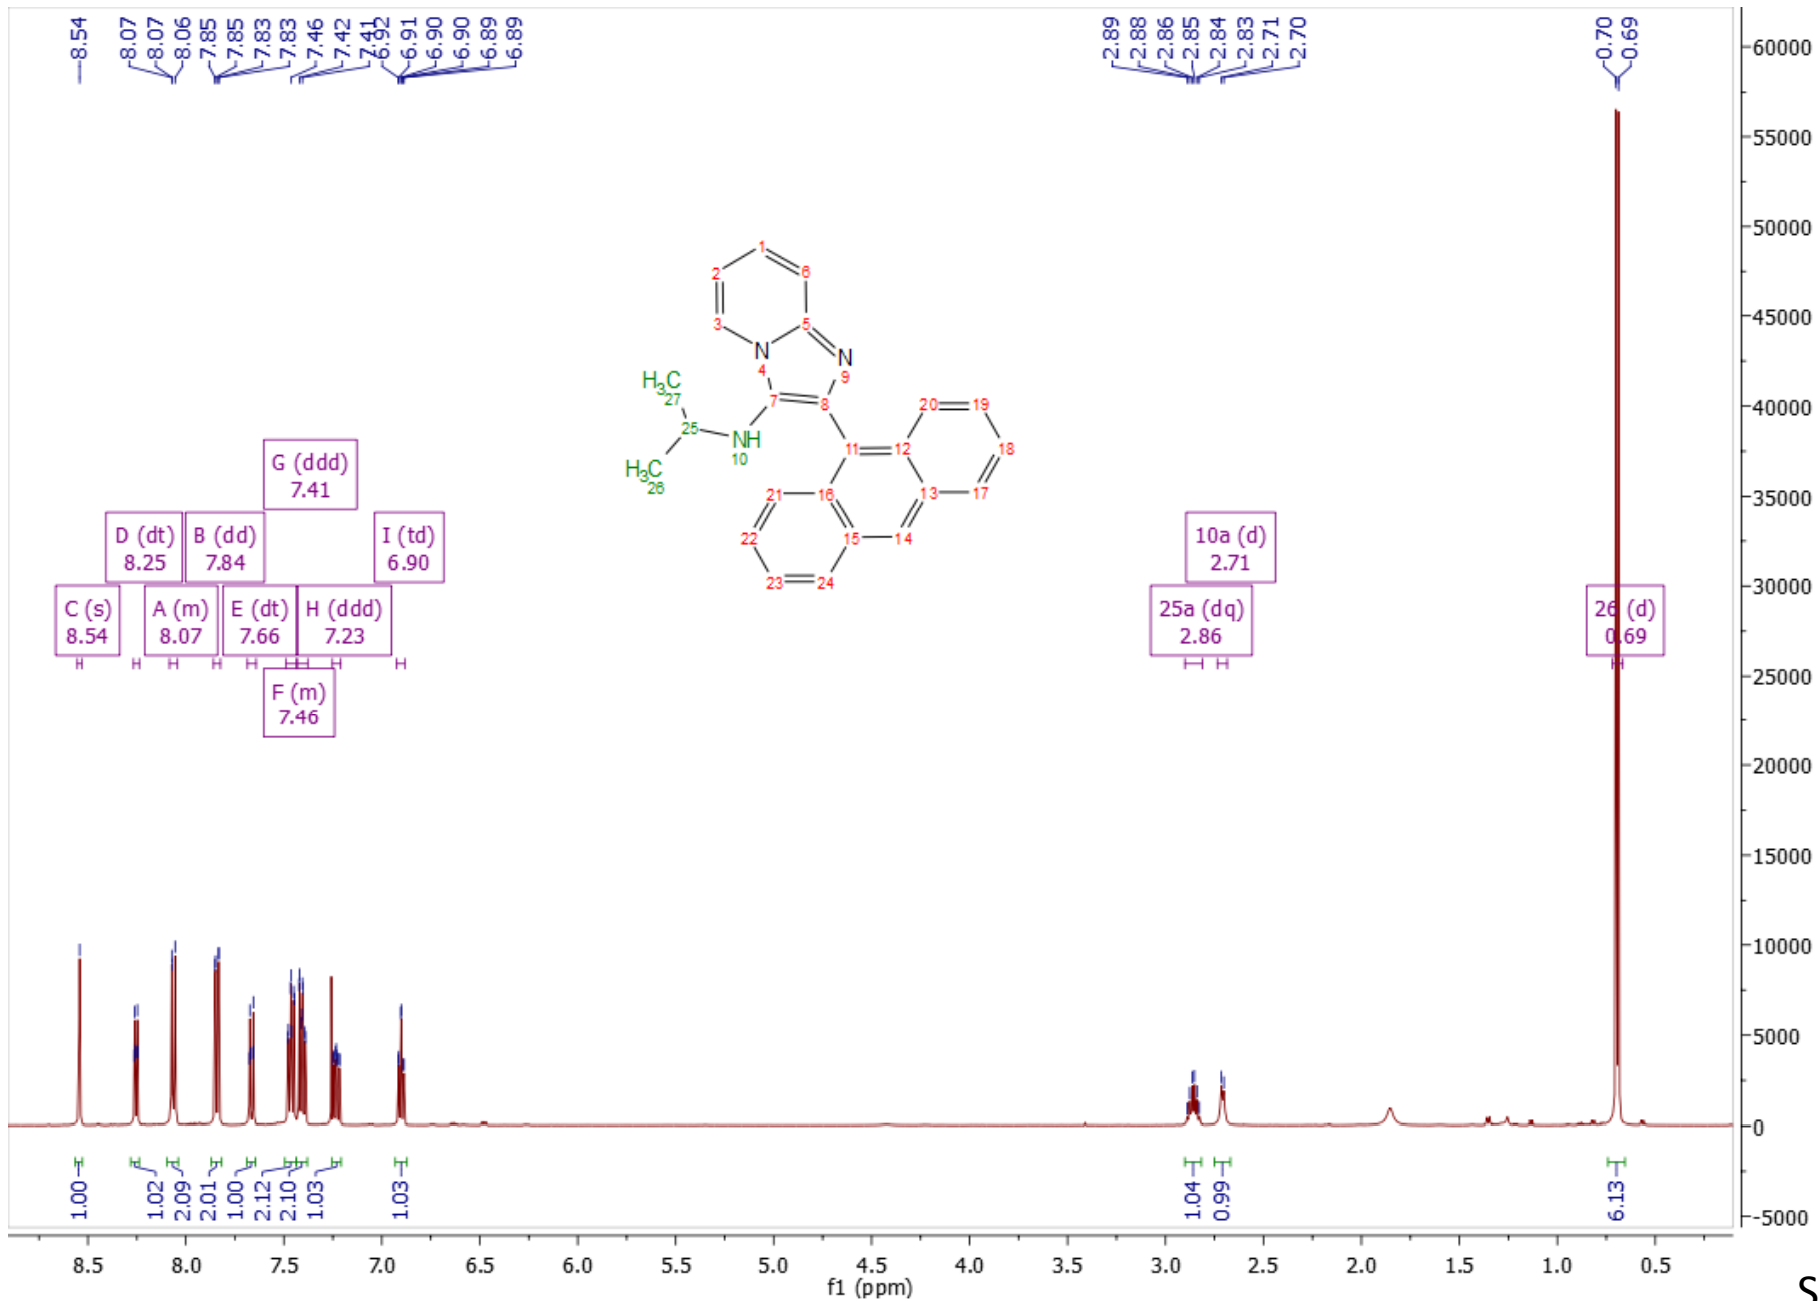

# 5c <sup>13</sup>C Spectrum

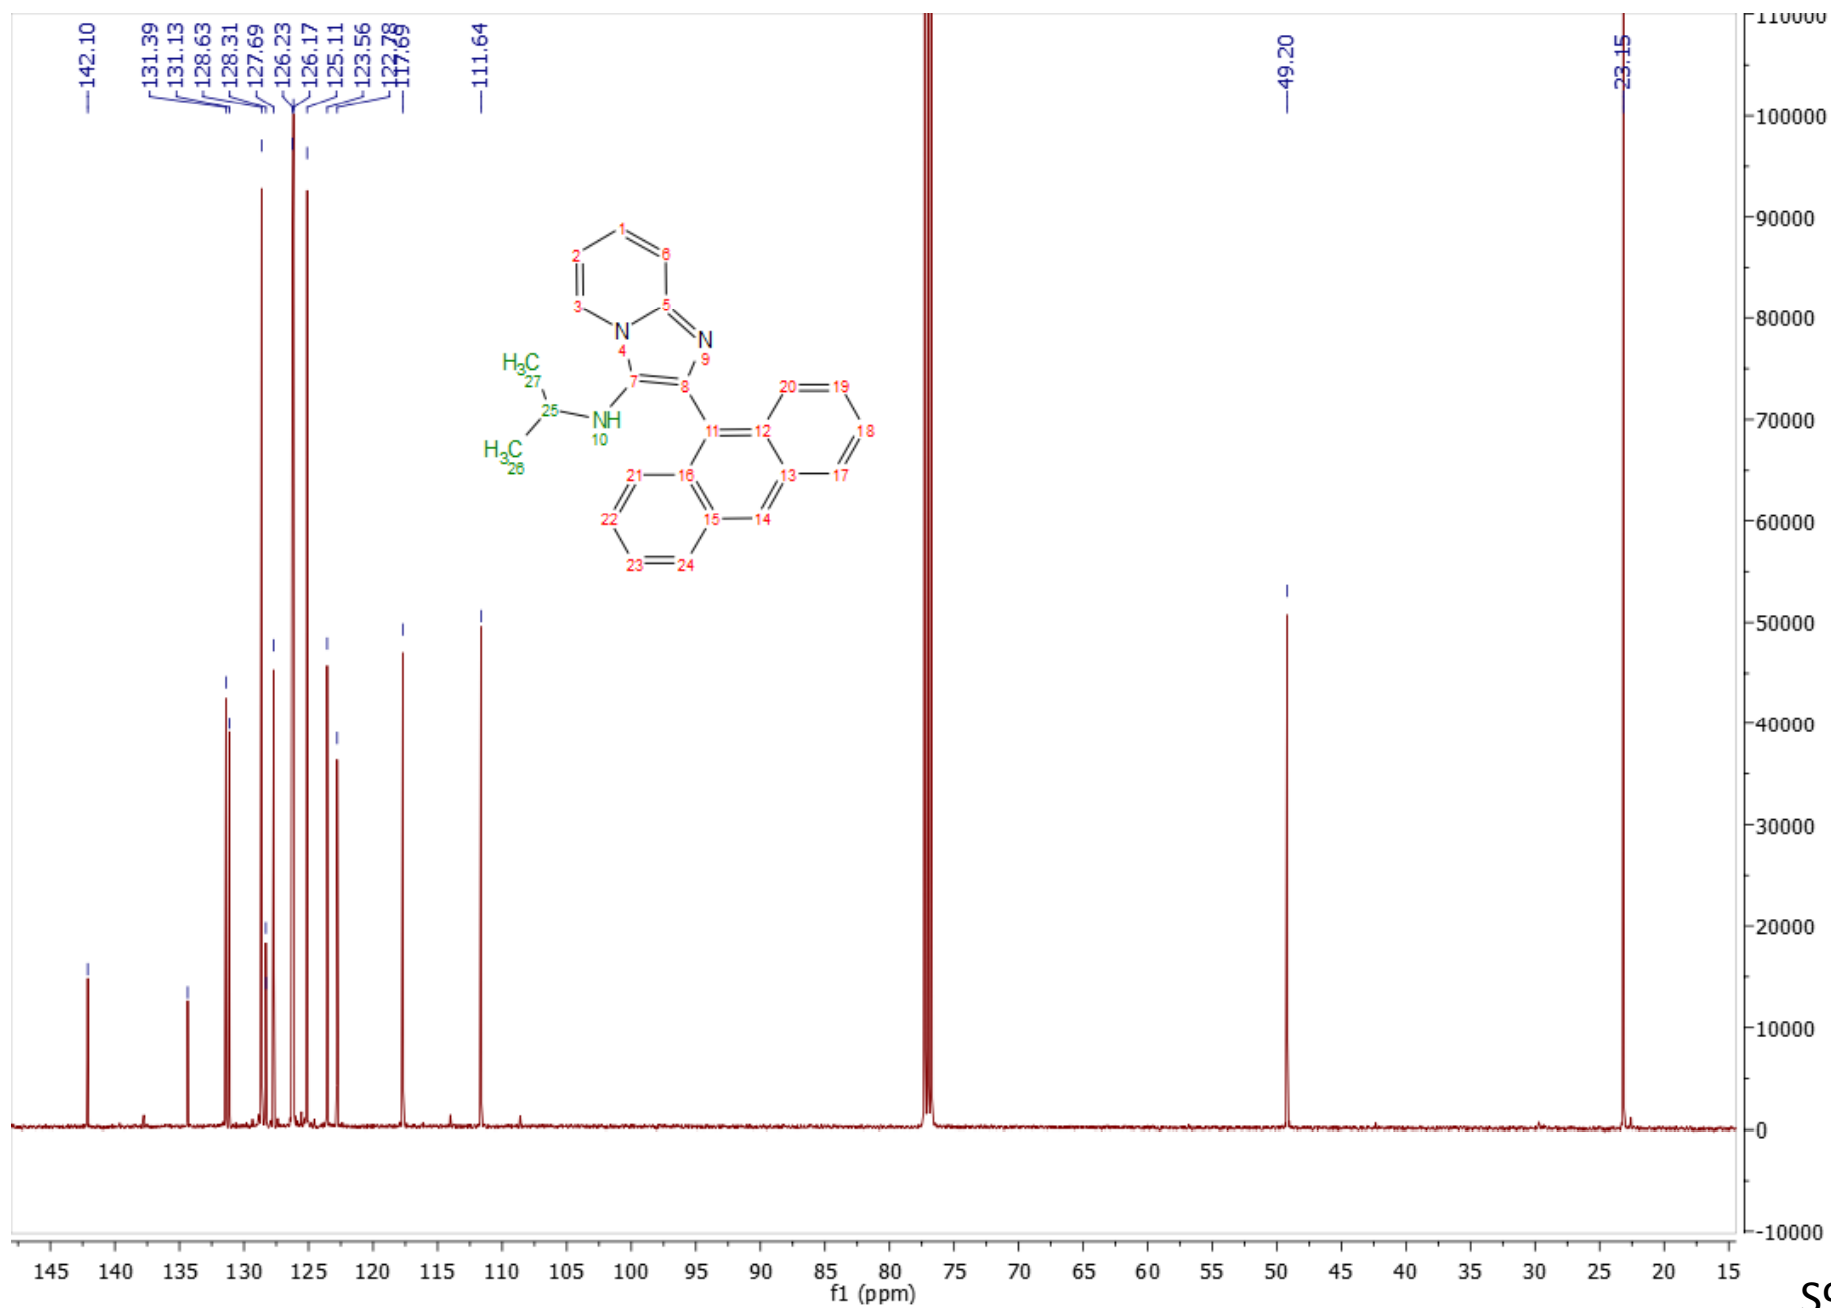

# 5c LC-MS

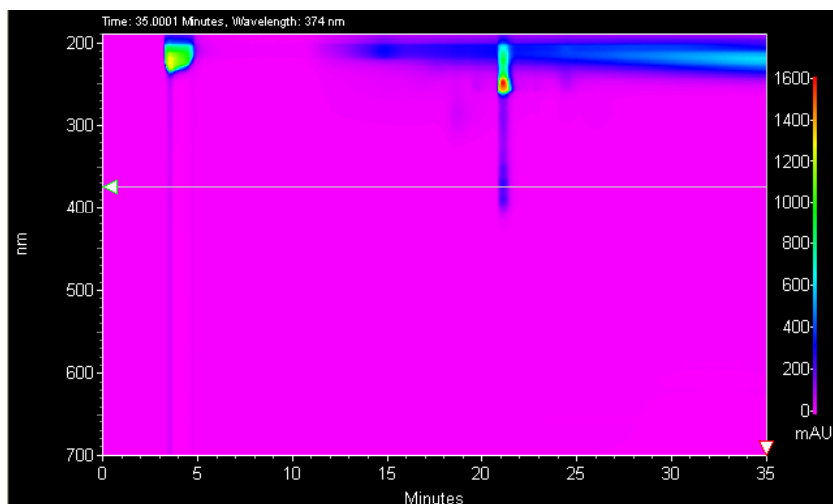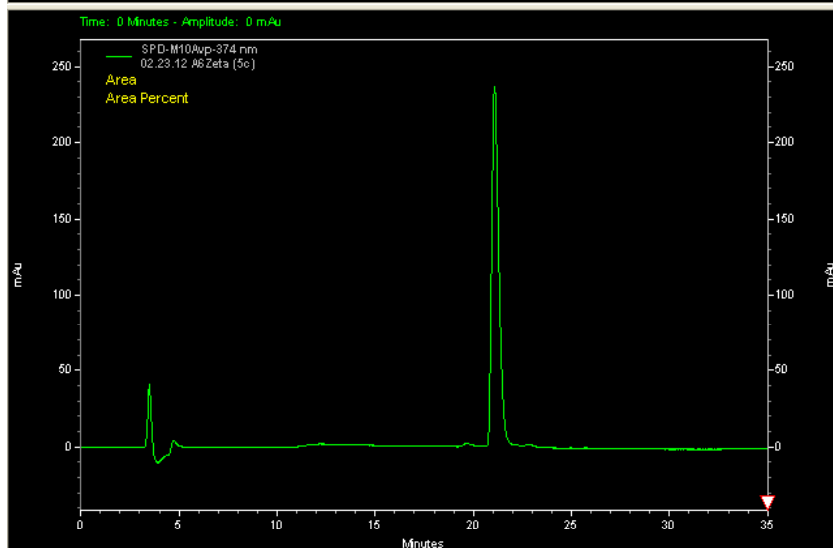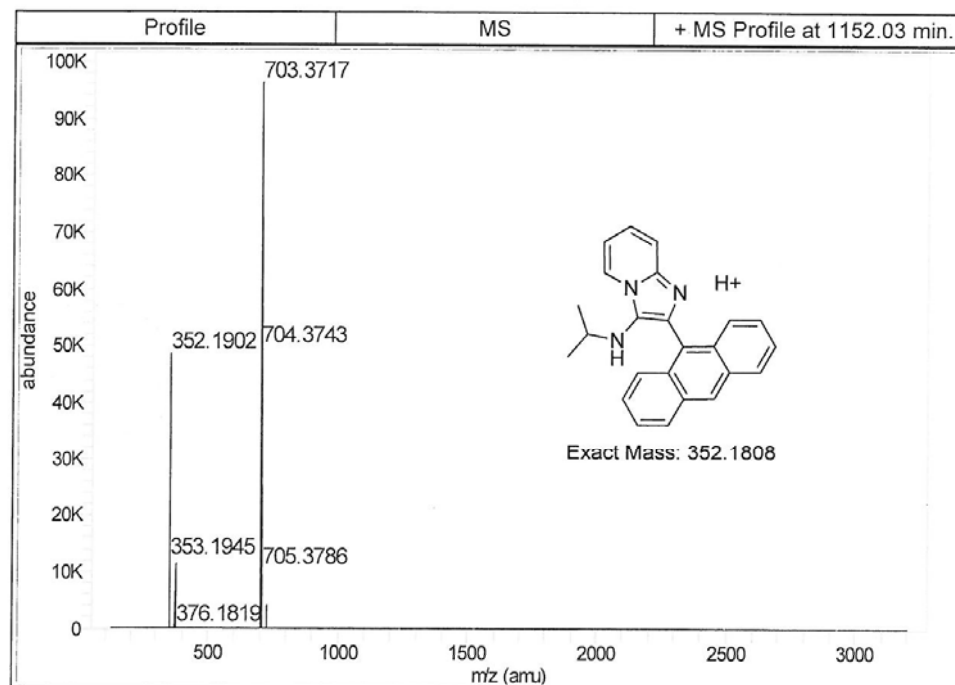

# 5d <sup>1</sup>H Spectrum

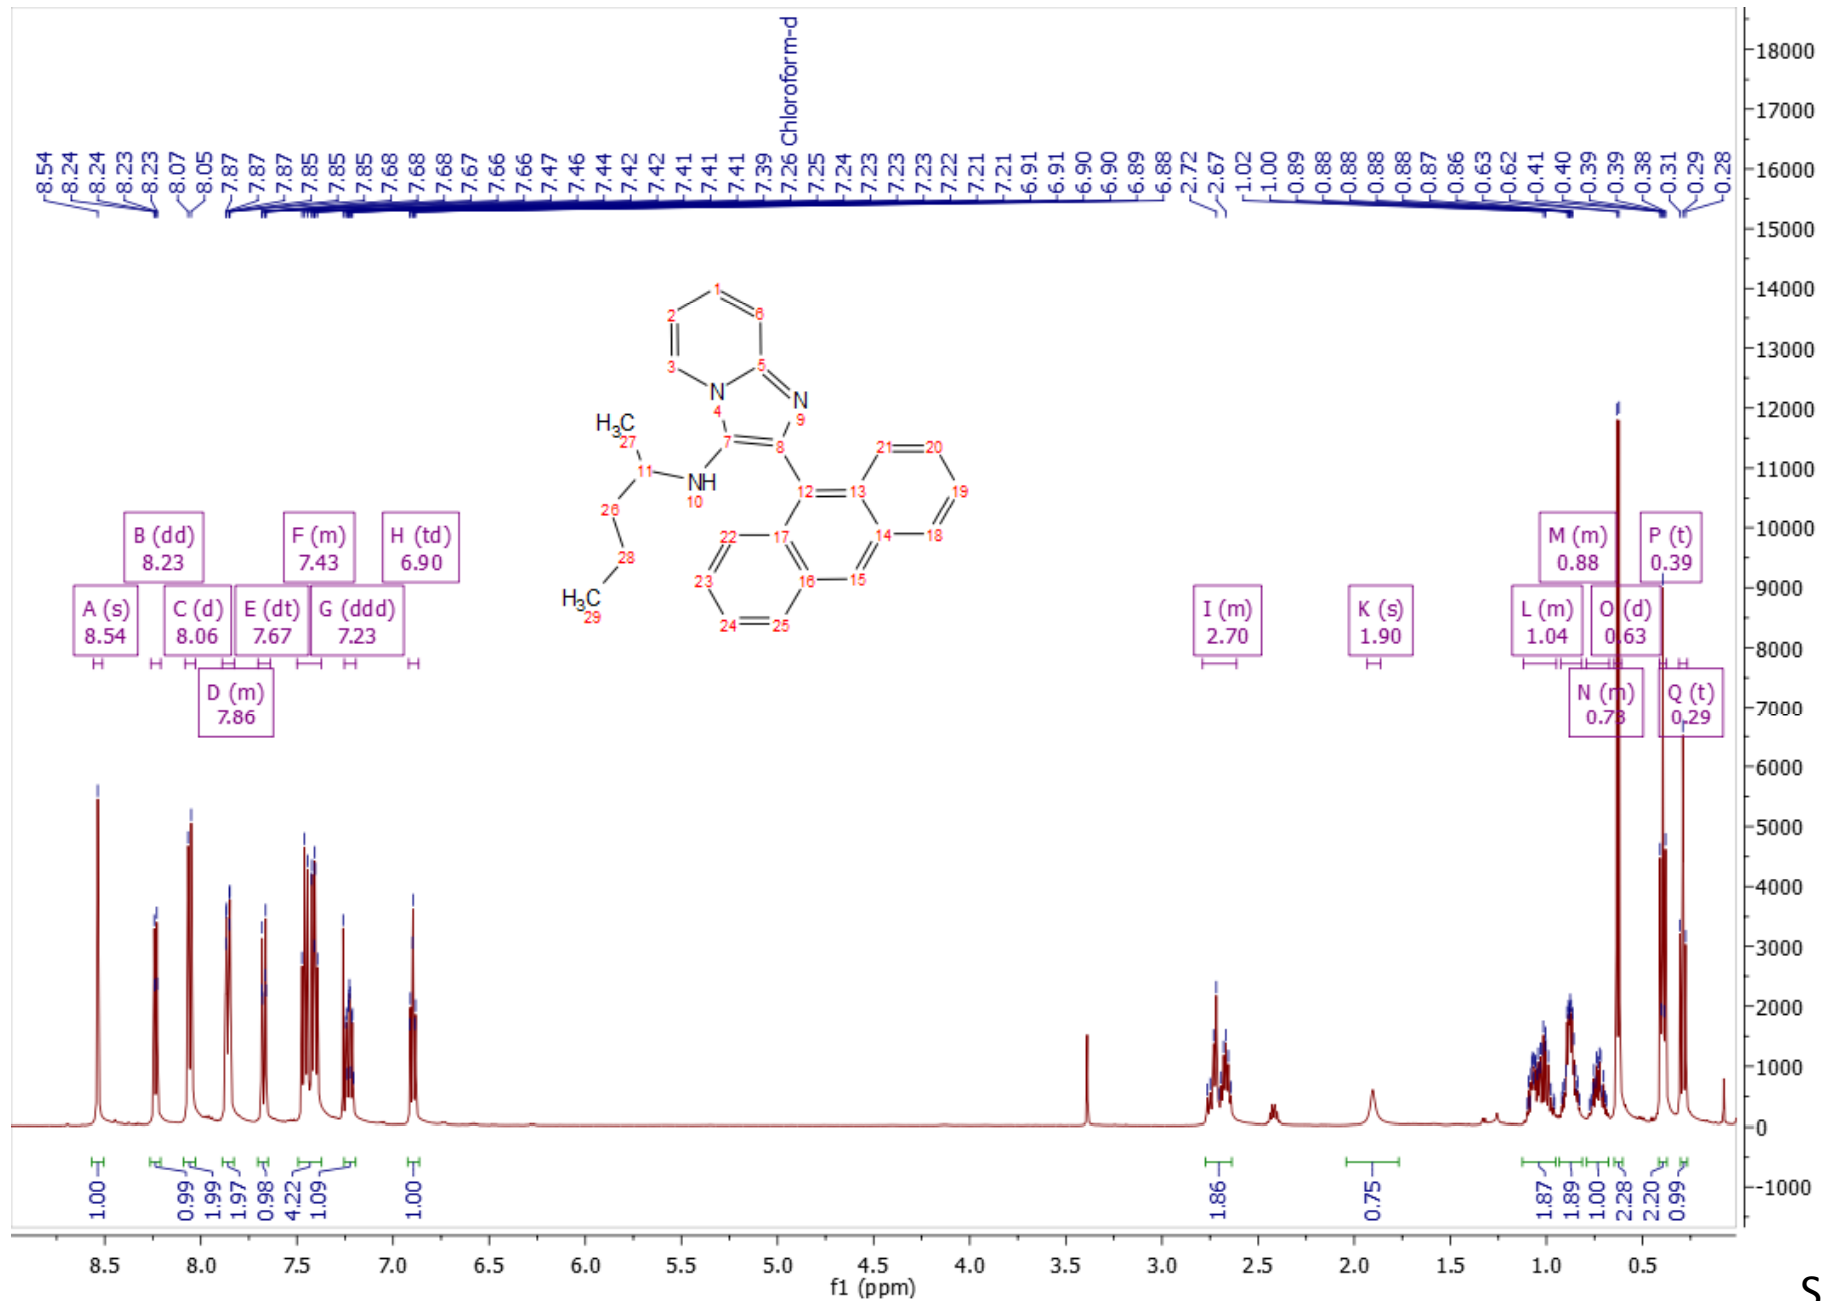

# 5d <sup>13</sup>C Spectrum

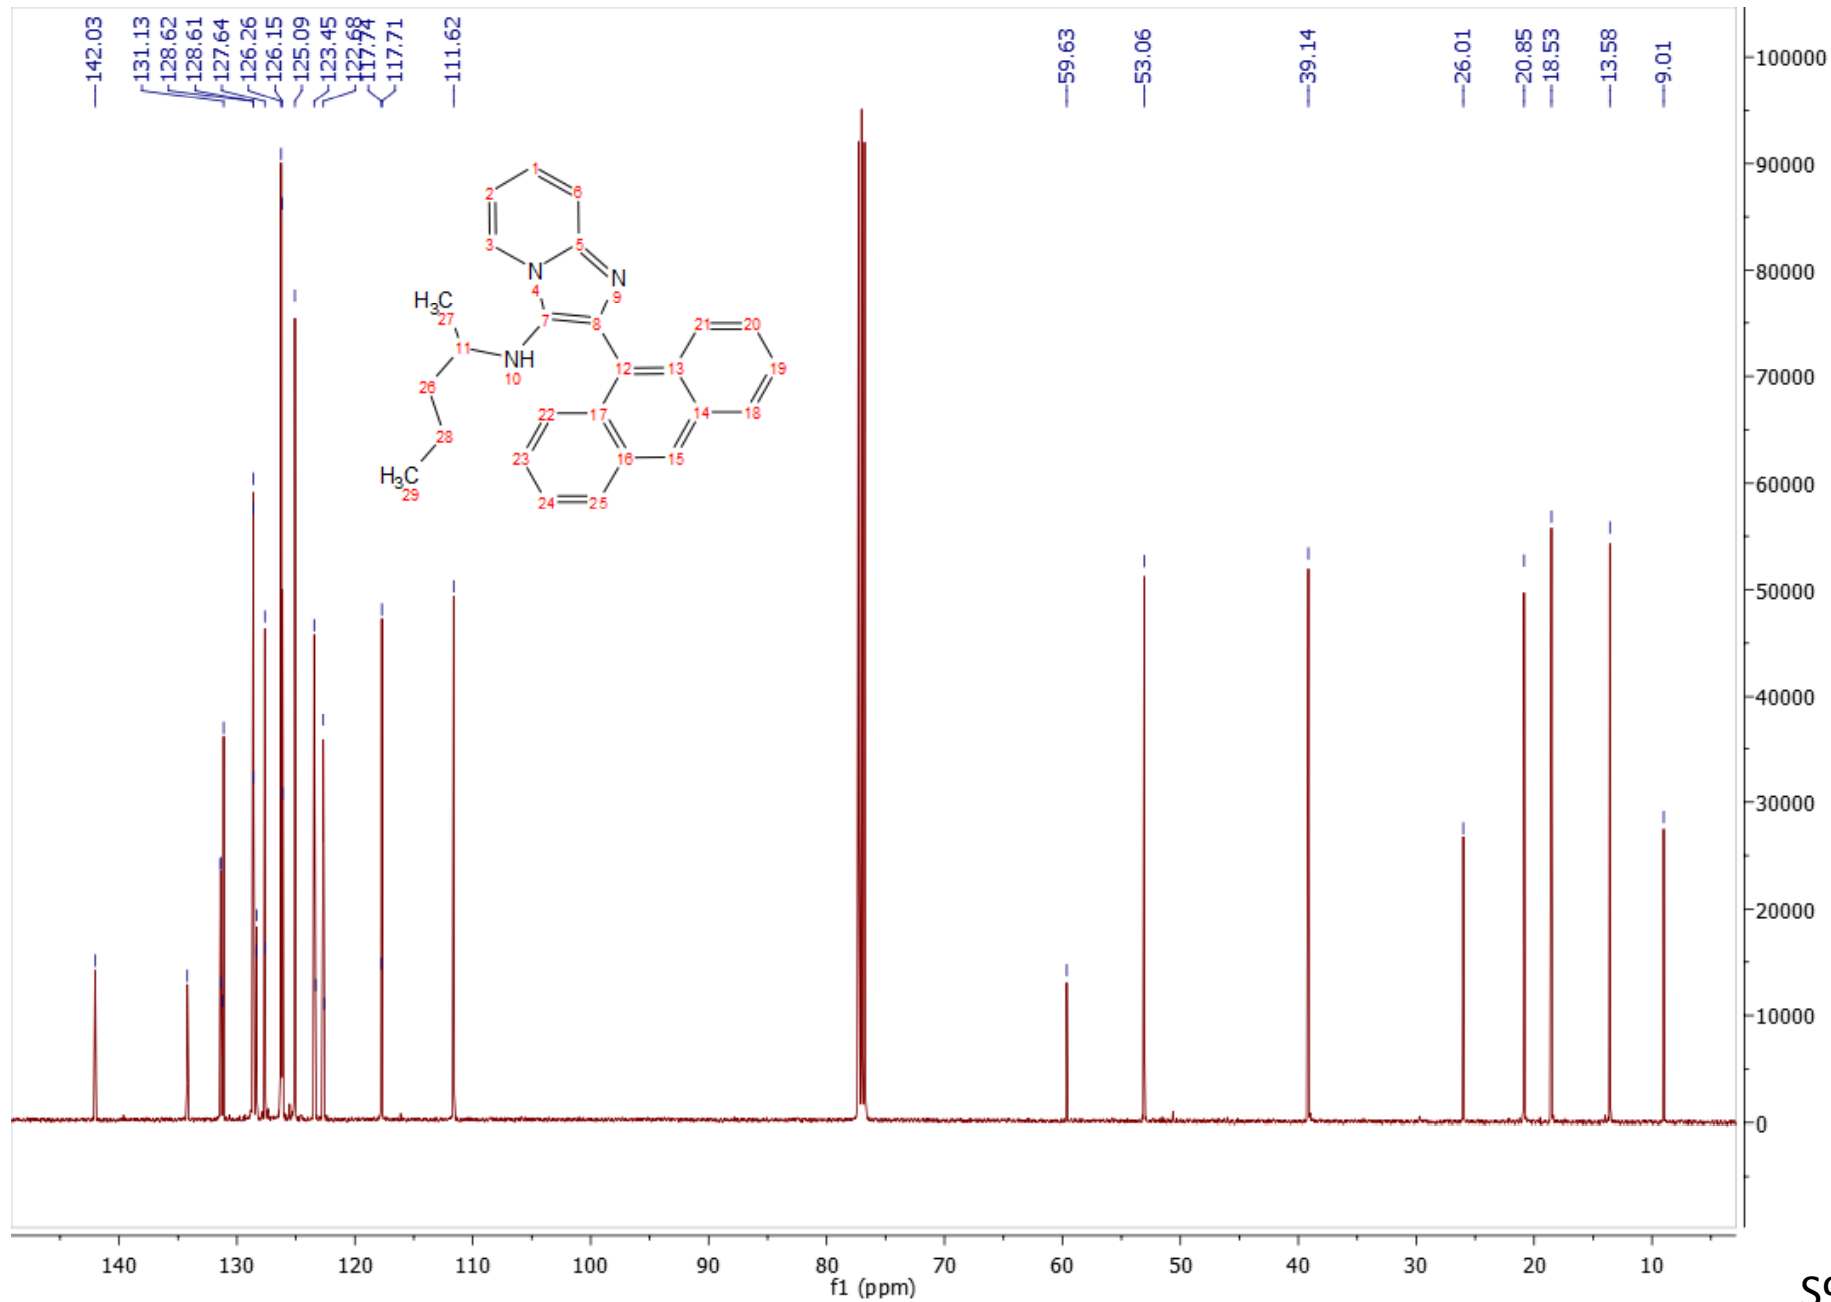

# 5d LC-MS

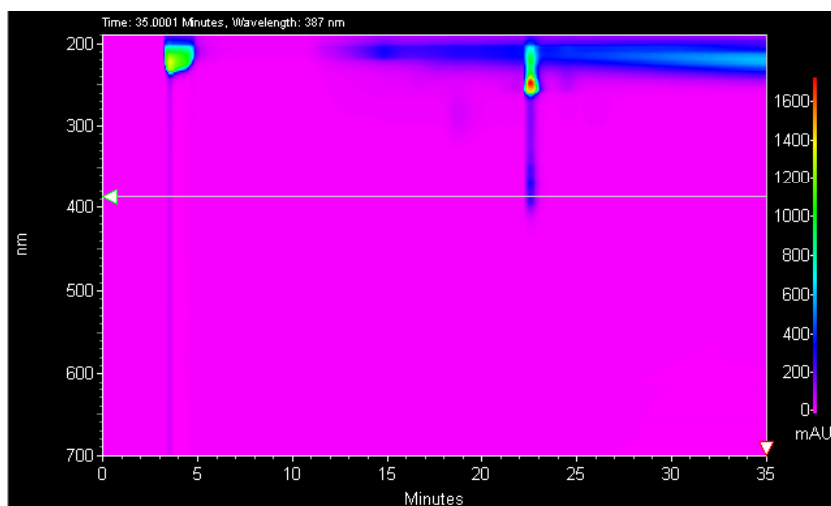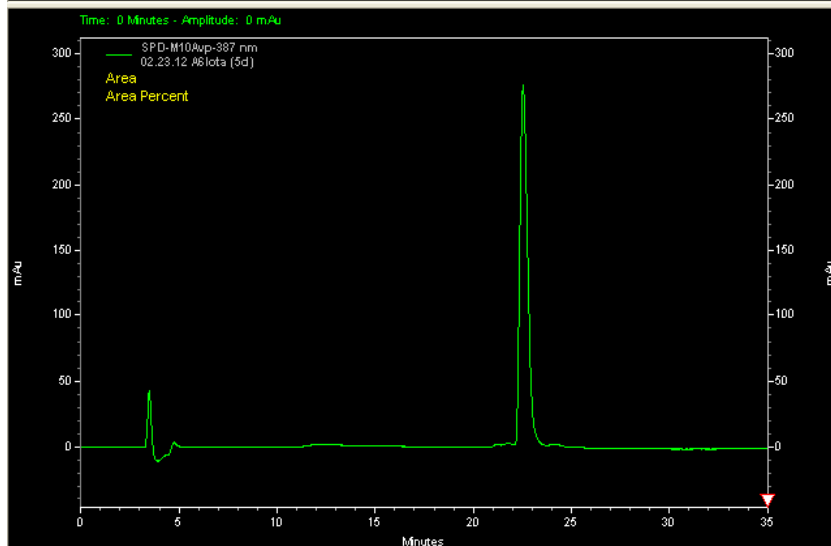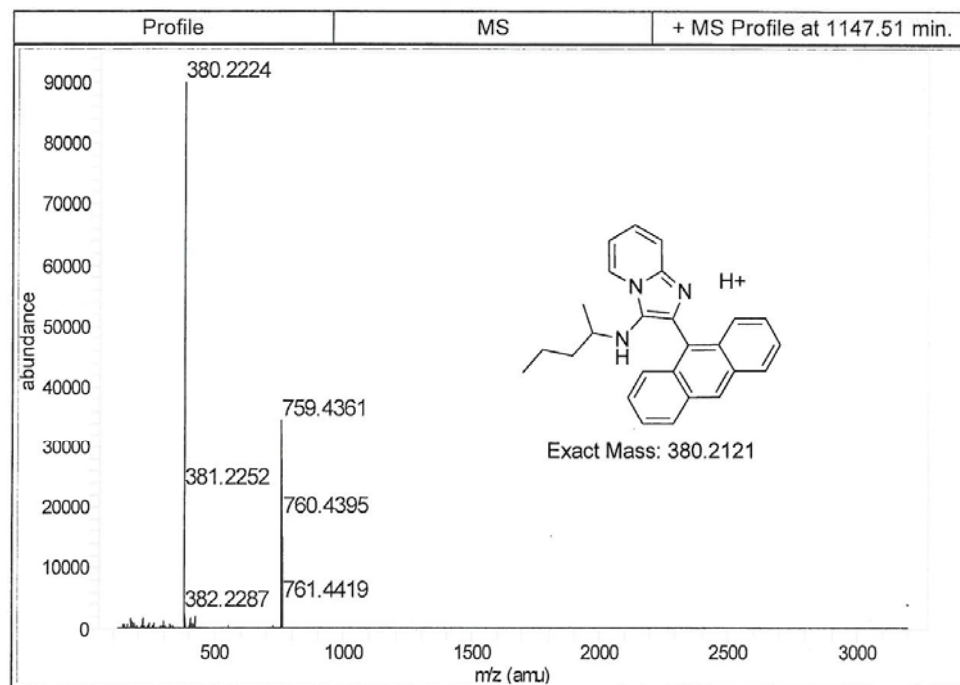

# 5e <sup>1</sup>H Spectrum

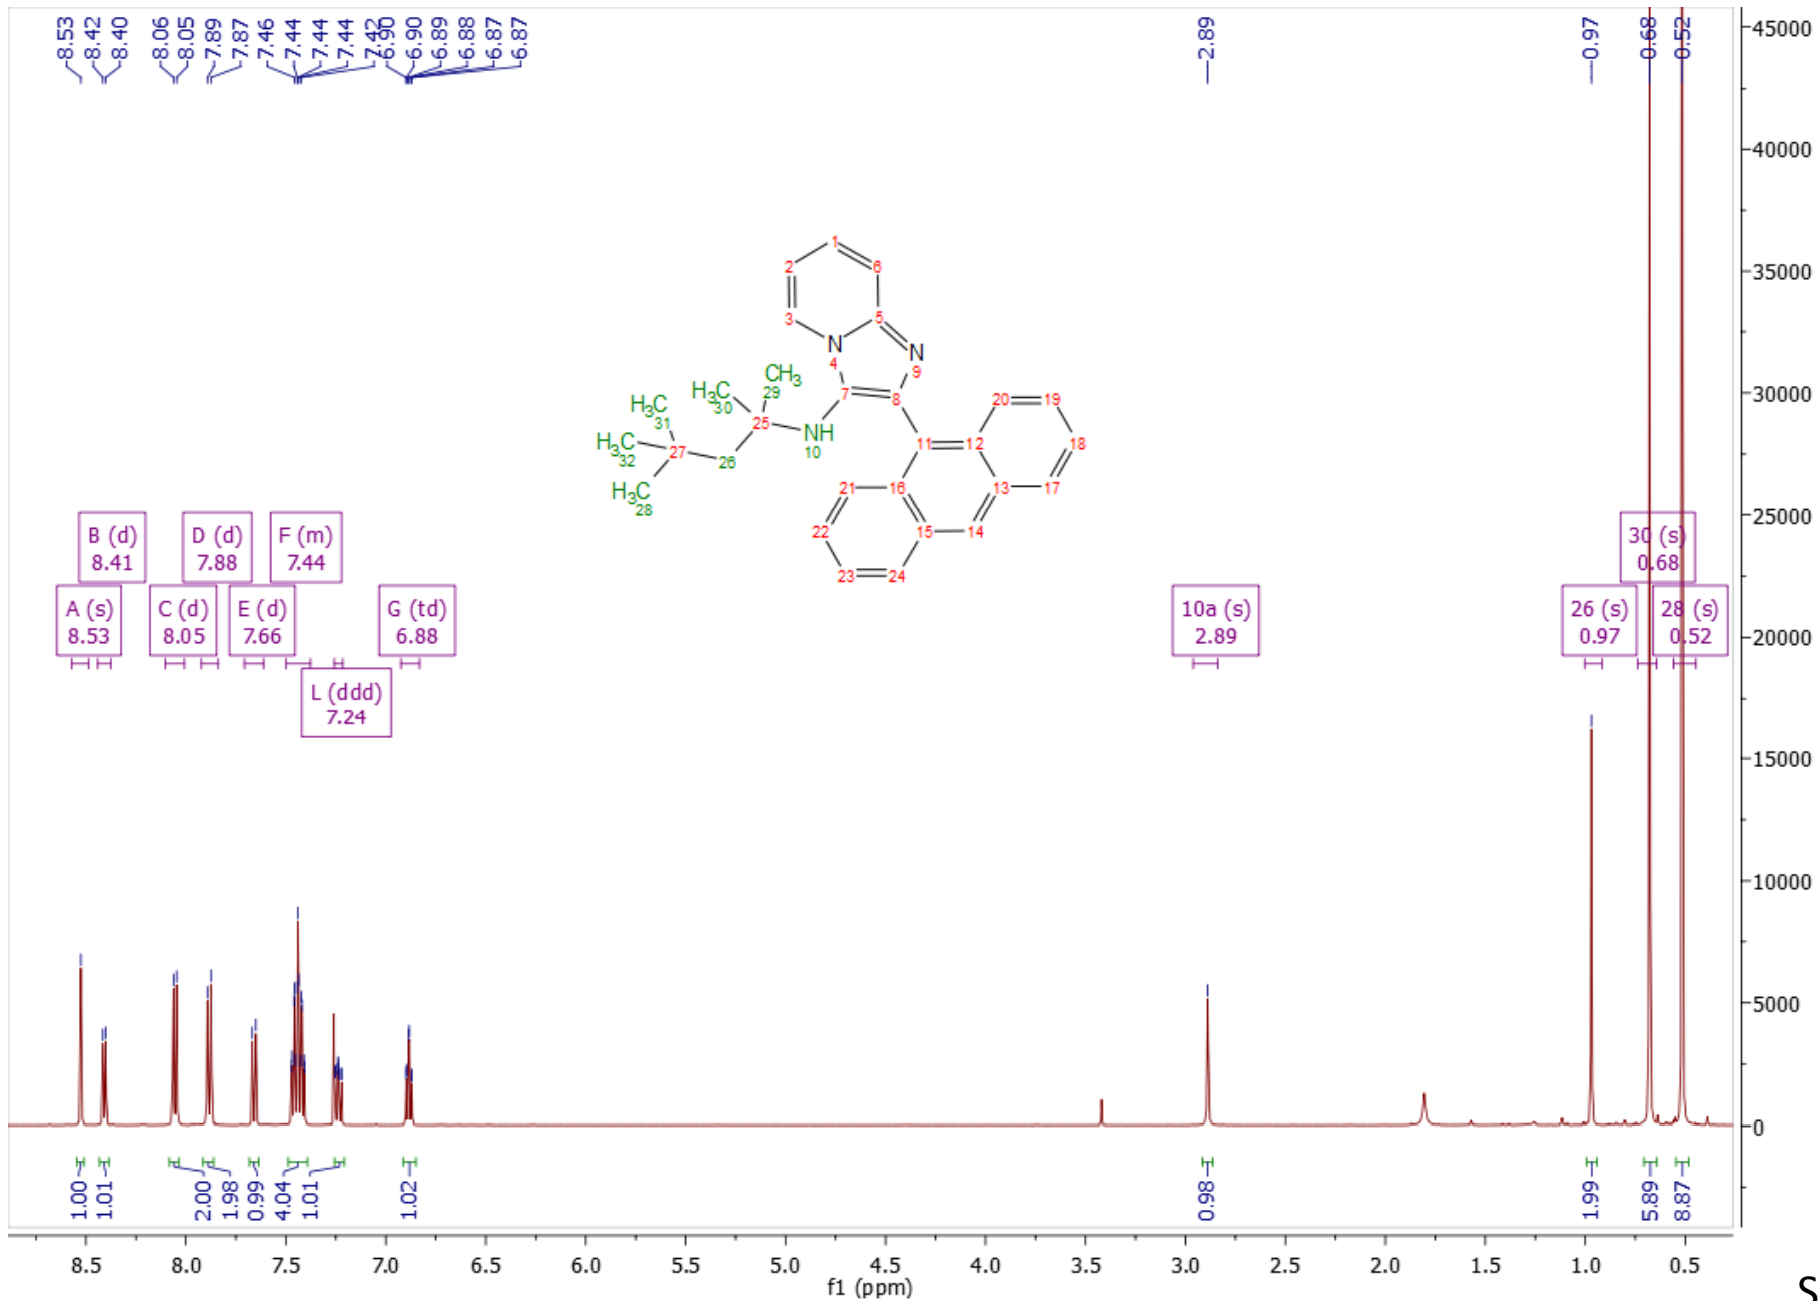

# 5e <sup>13</sup>C Spectrum

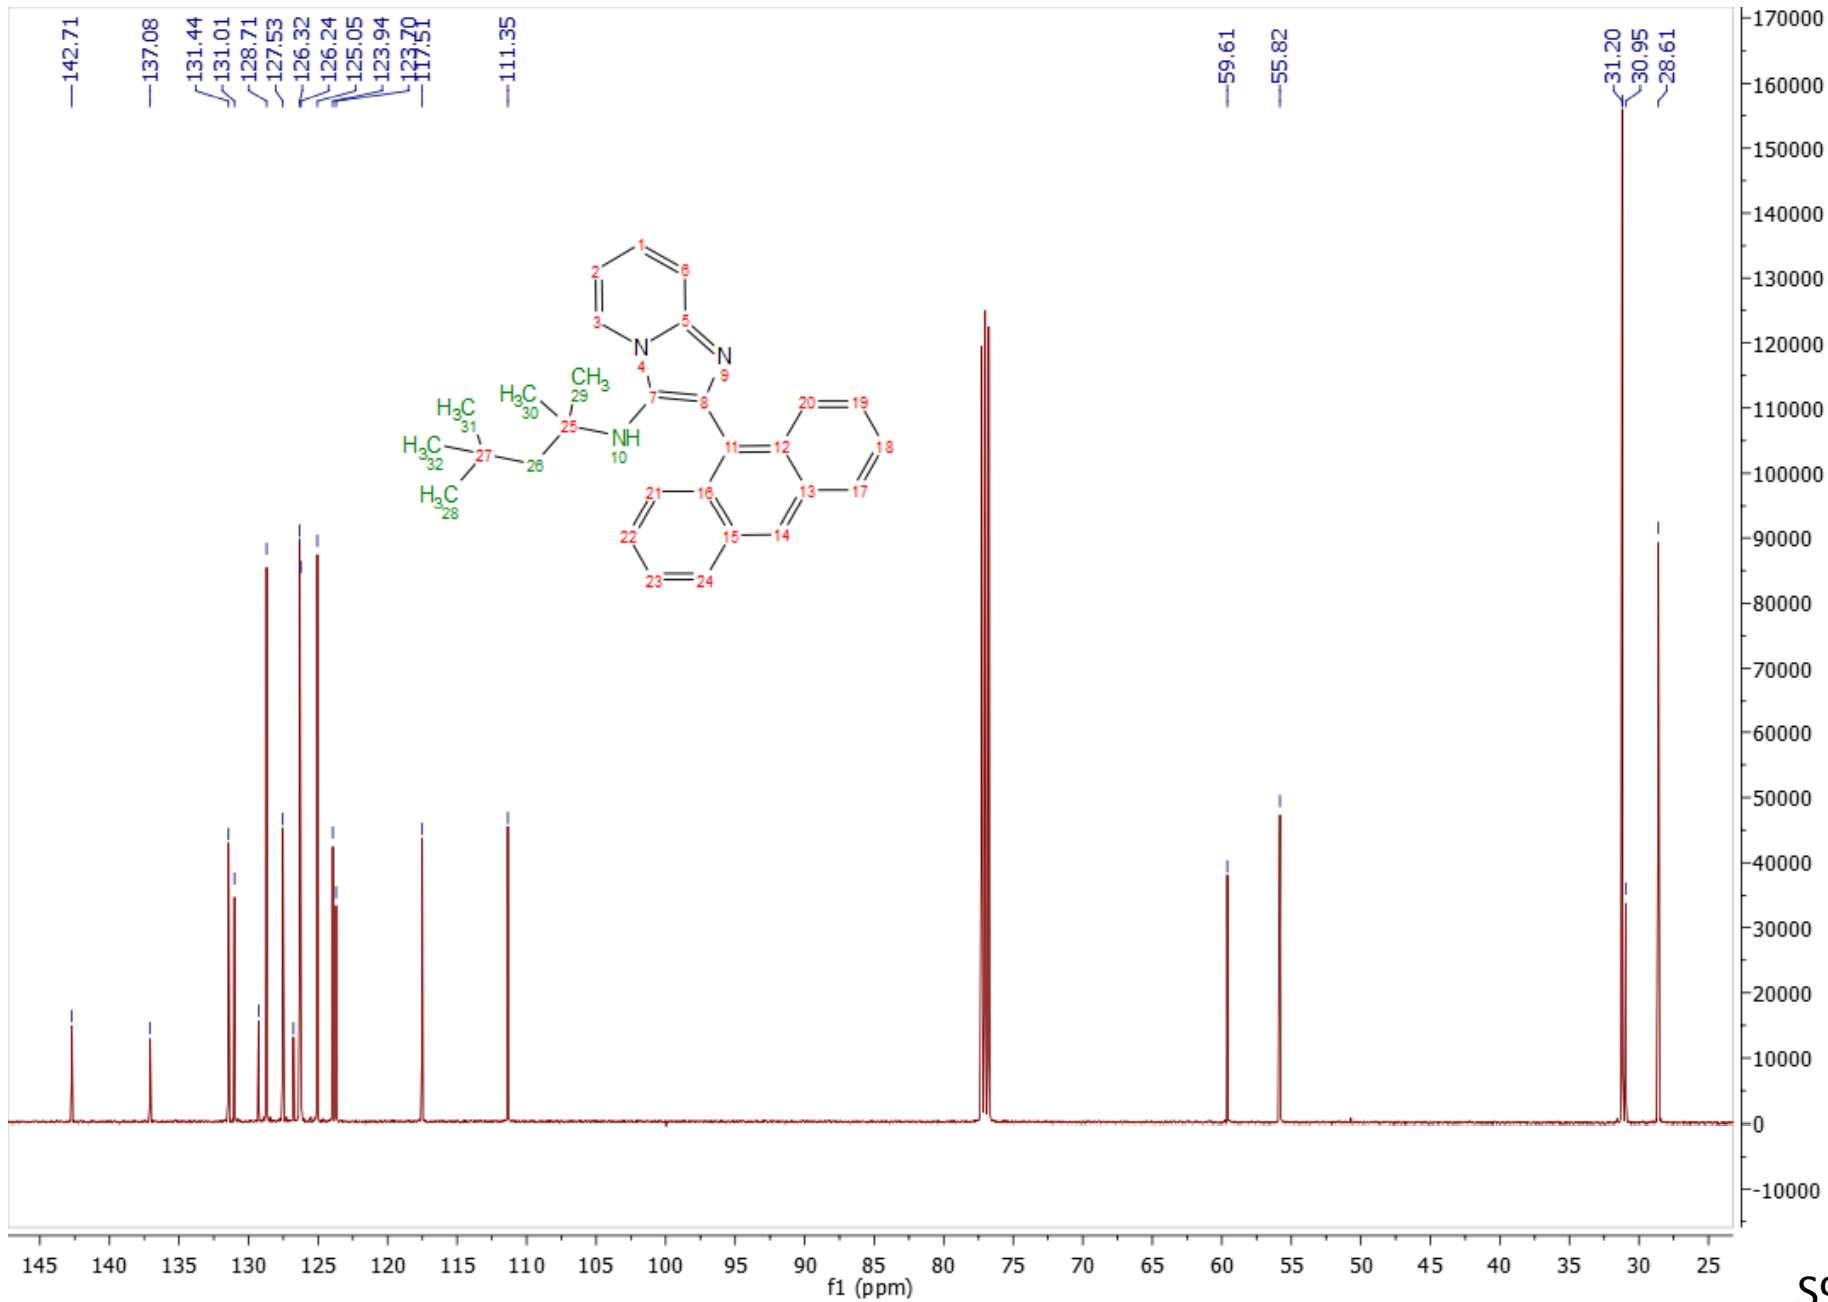



# 5e LC-MS

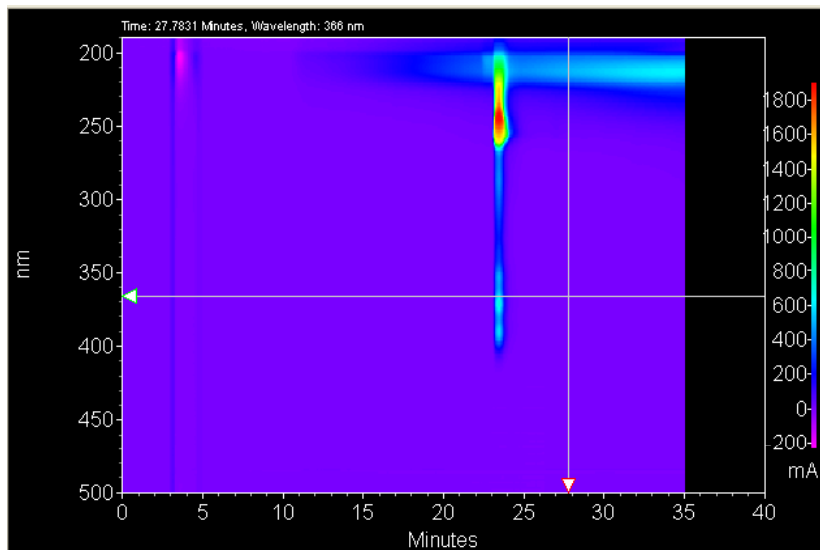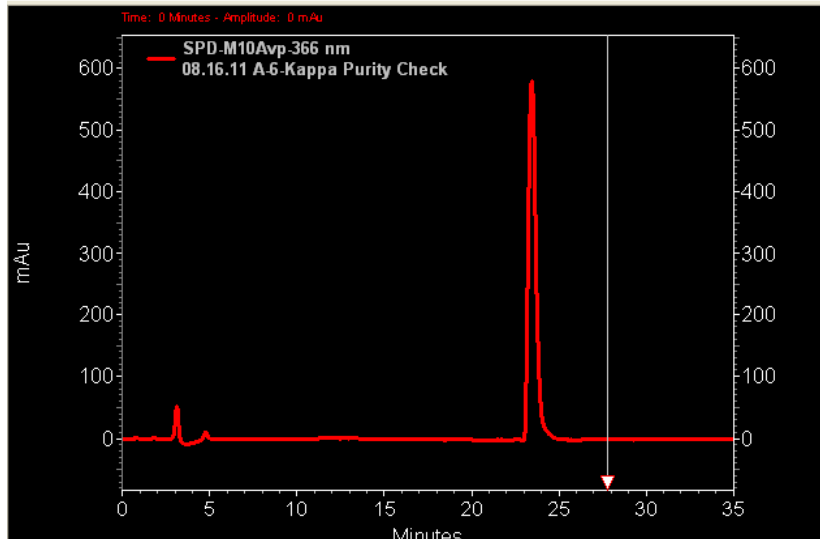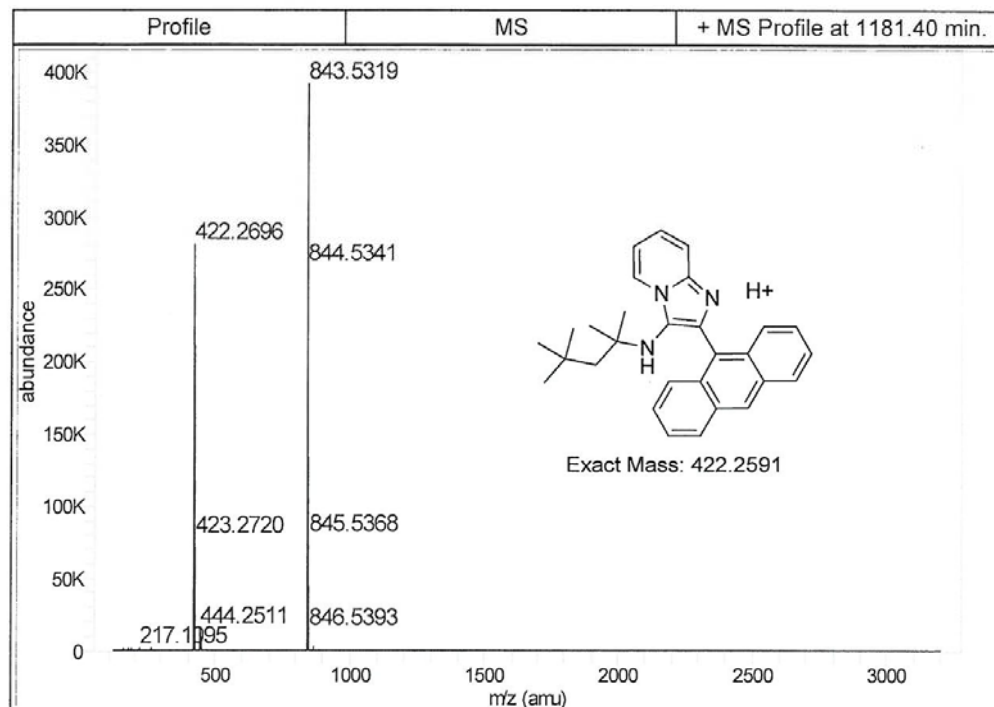

# 5f <sup>1</sup>H Spectrum

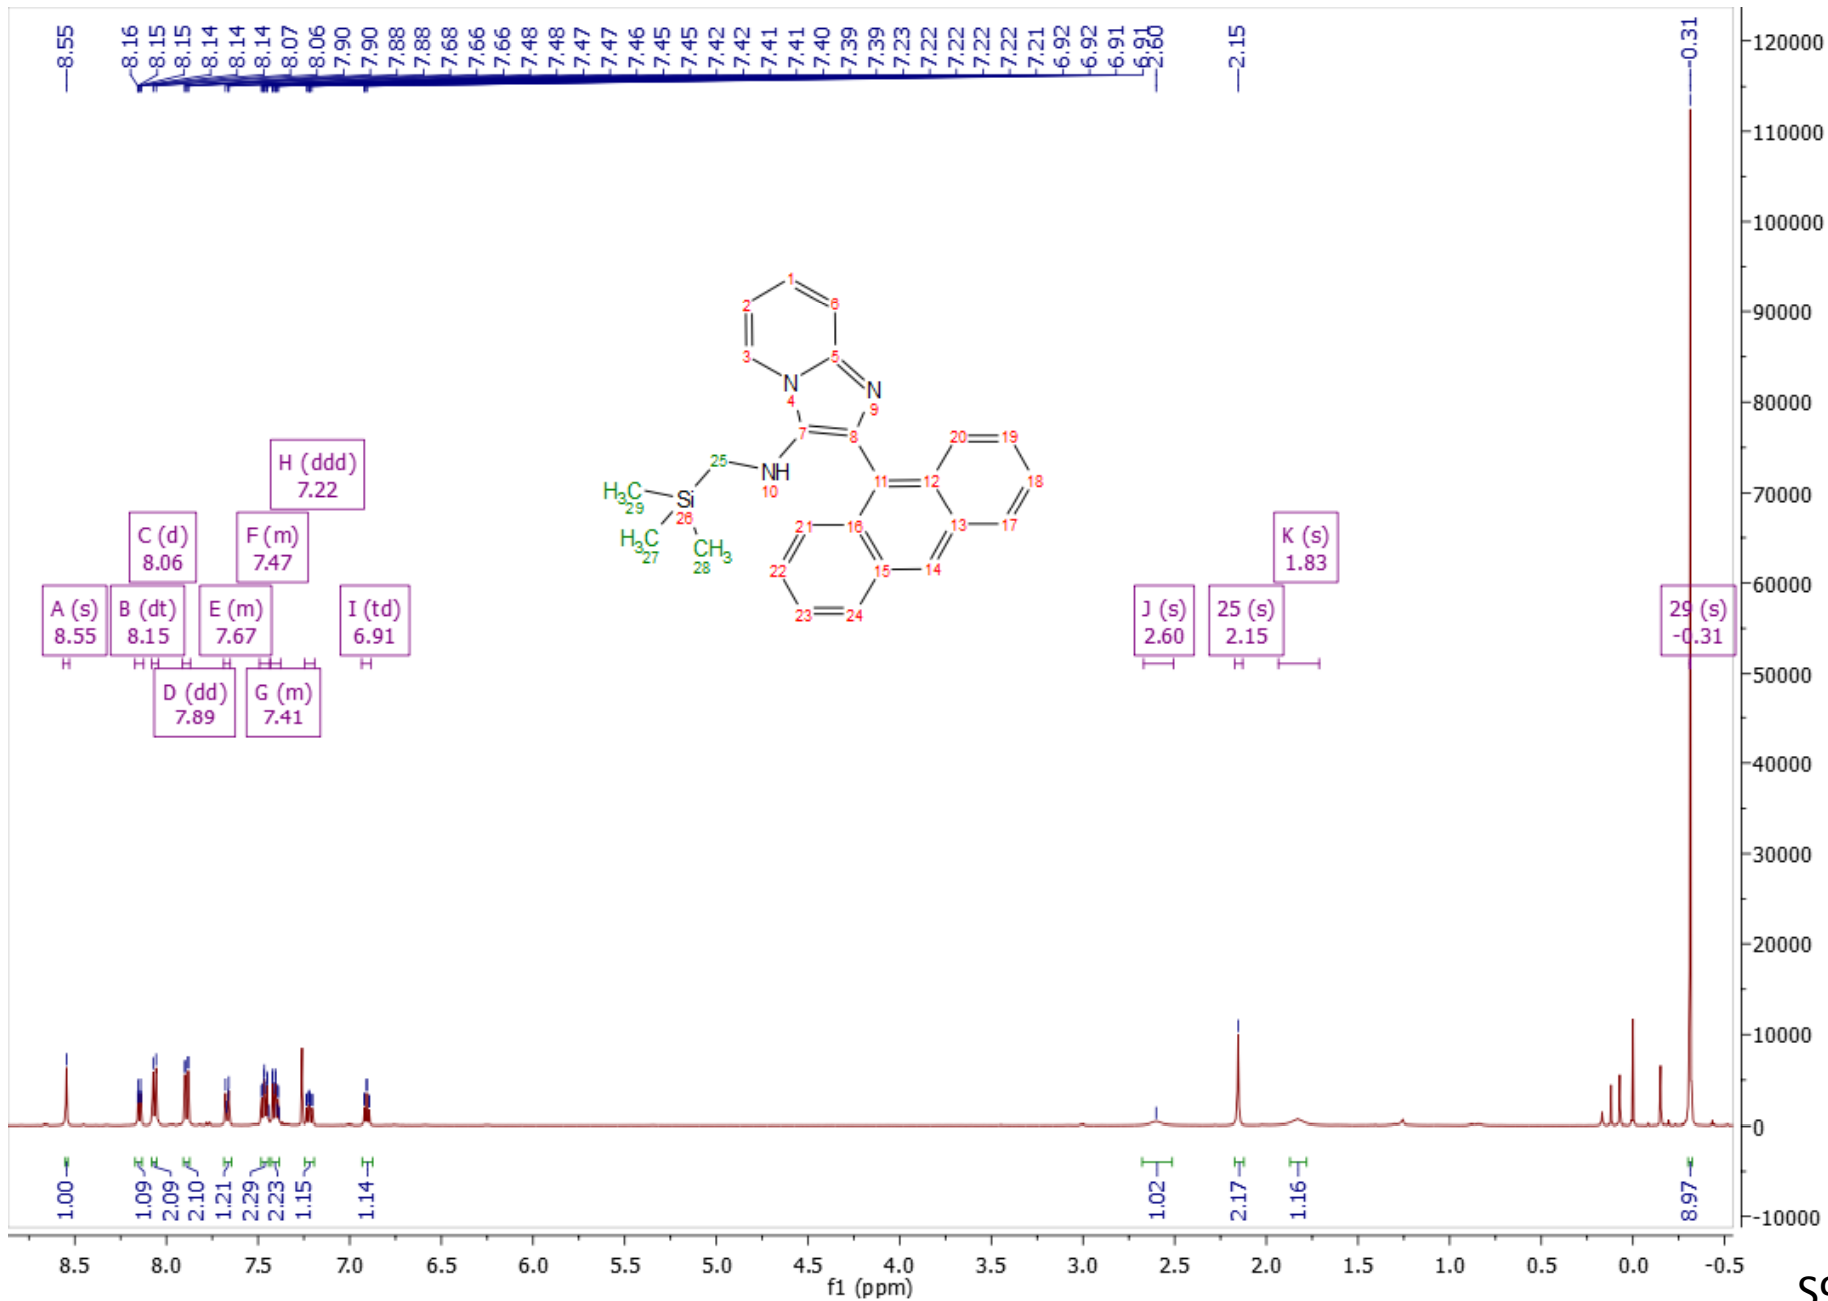

# 5f <sup>13</sup>C Spectrum

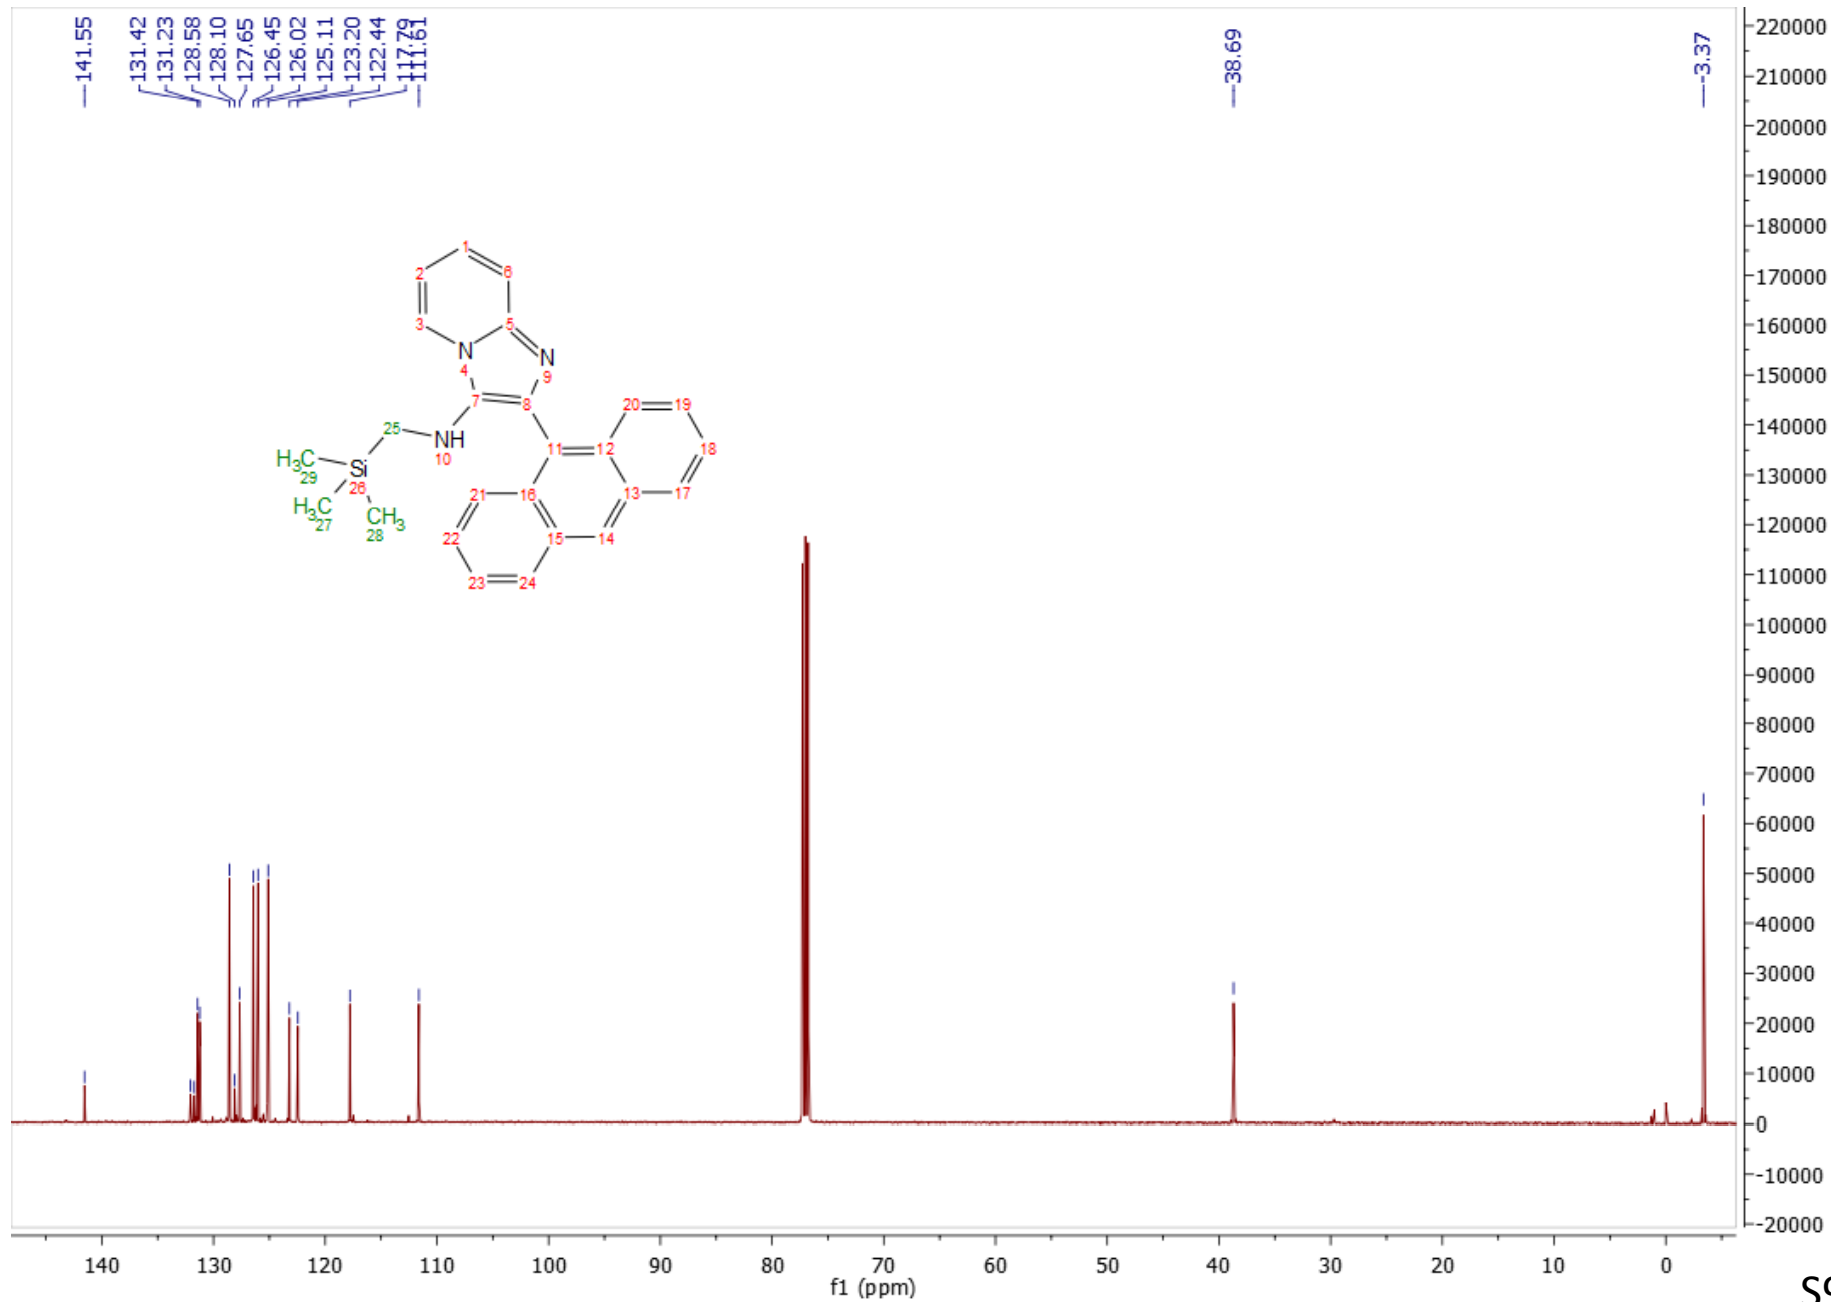

# 5f LC-MS

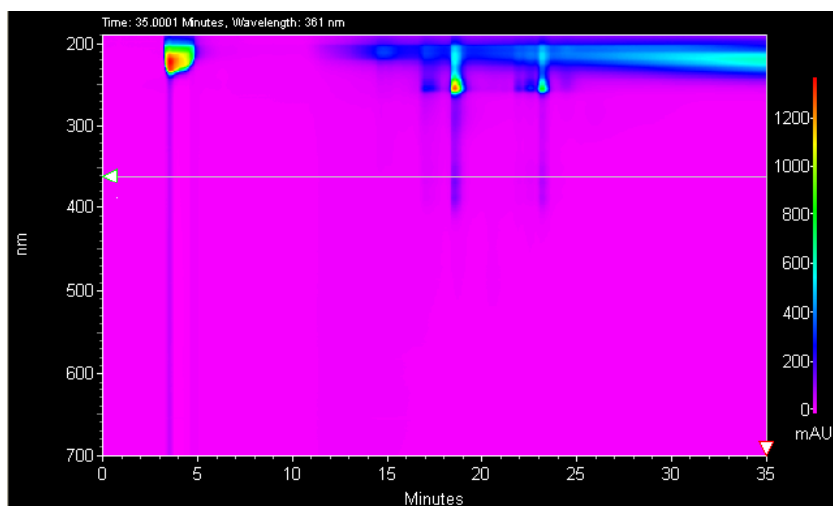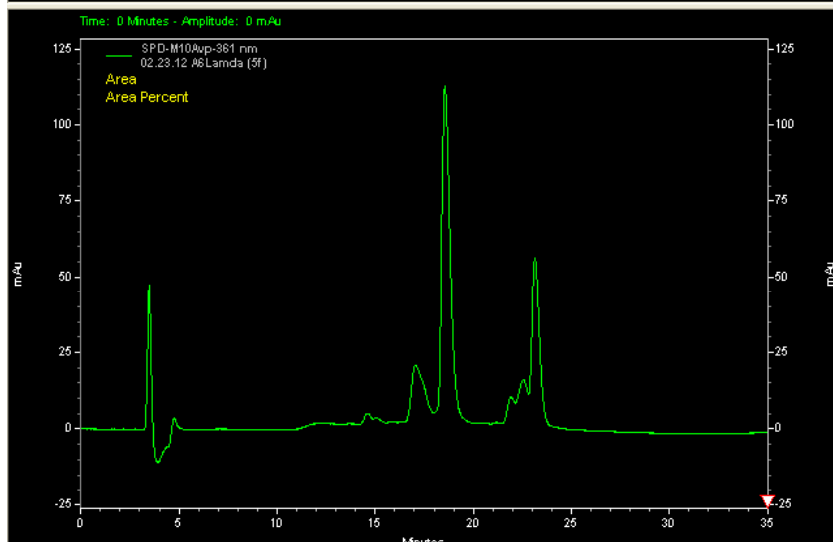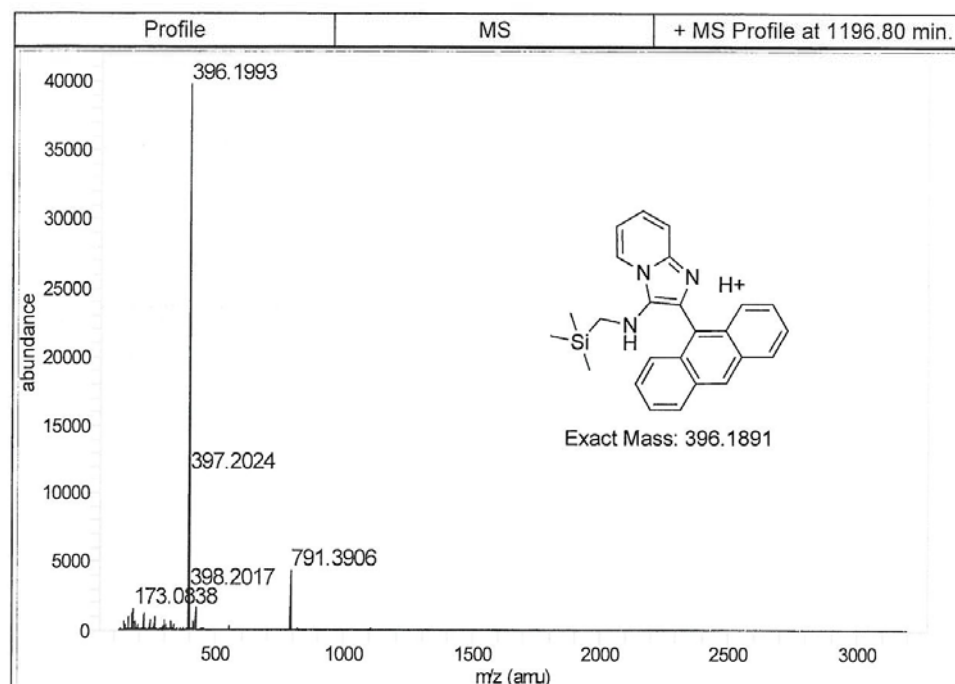

# 5g <sup>1</sup>H Spectrum

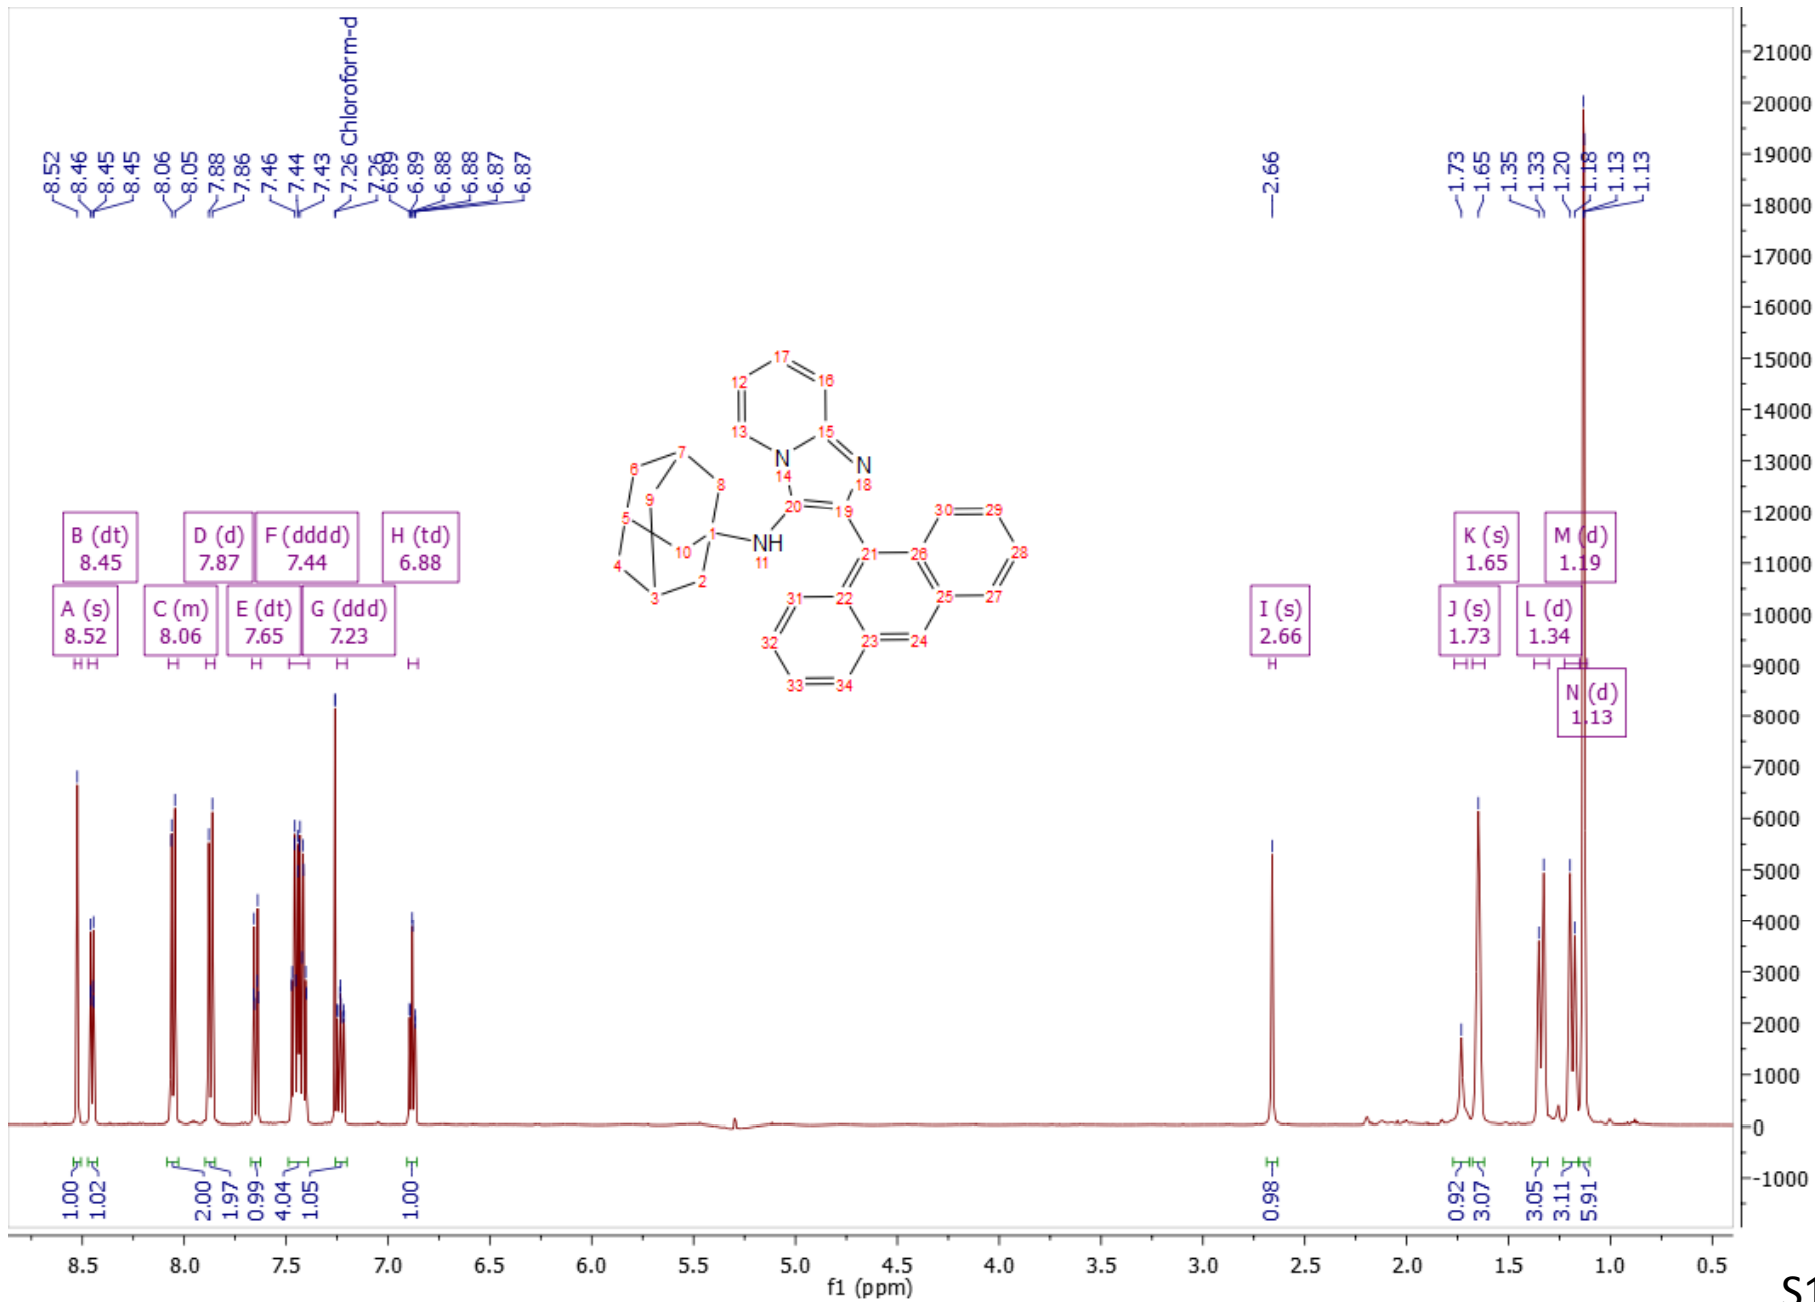

# 5g <sup>13</sup>C Spectrum

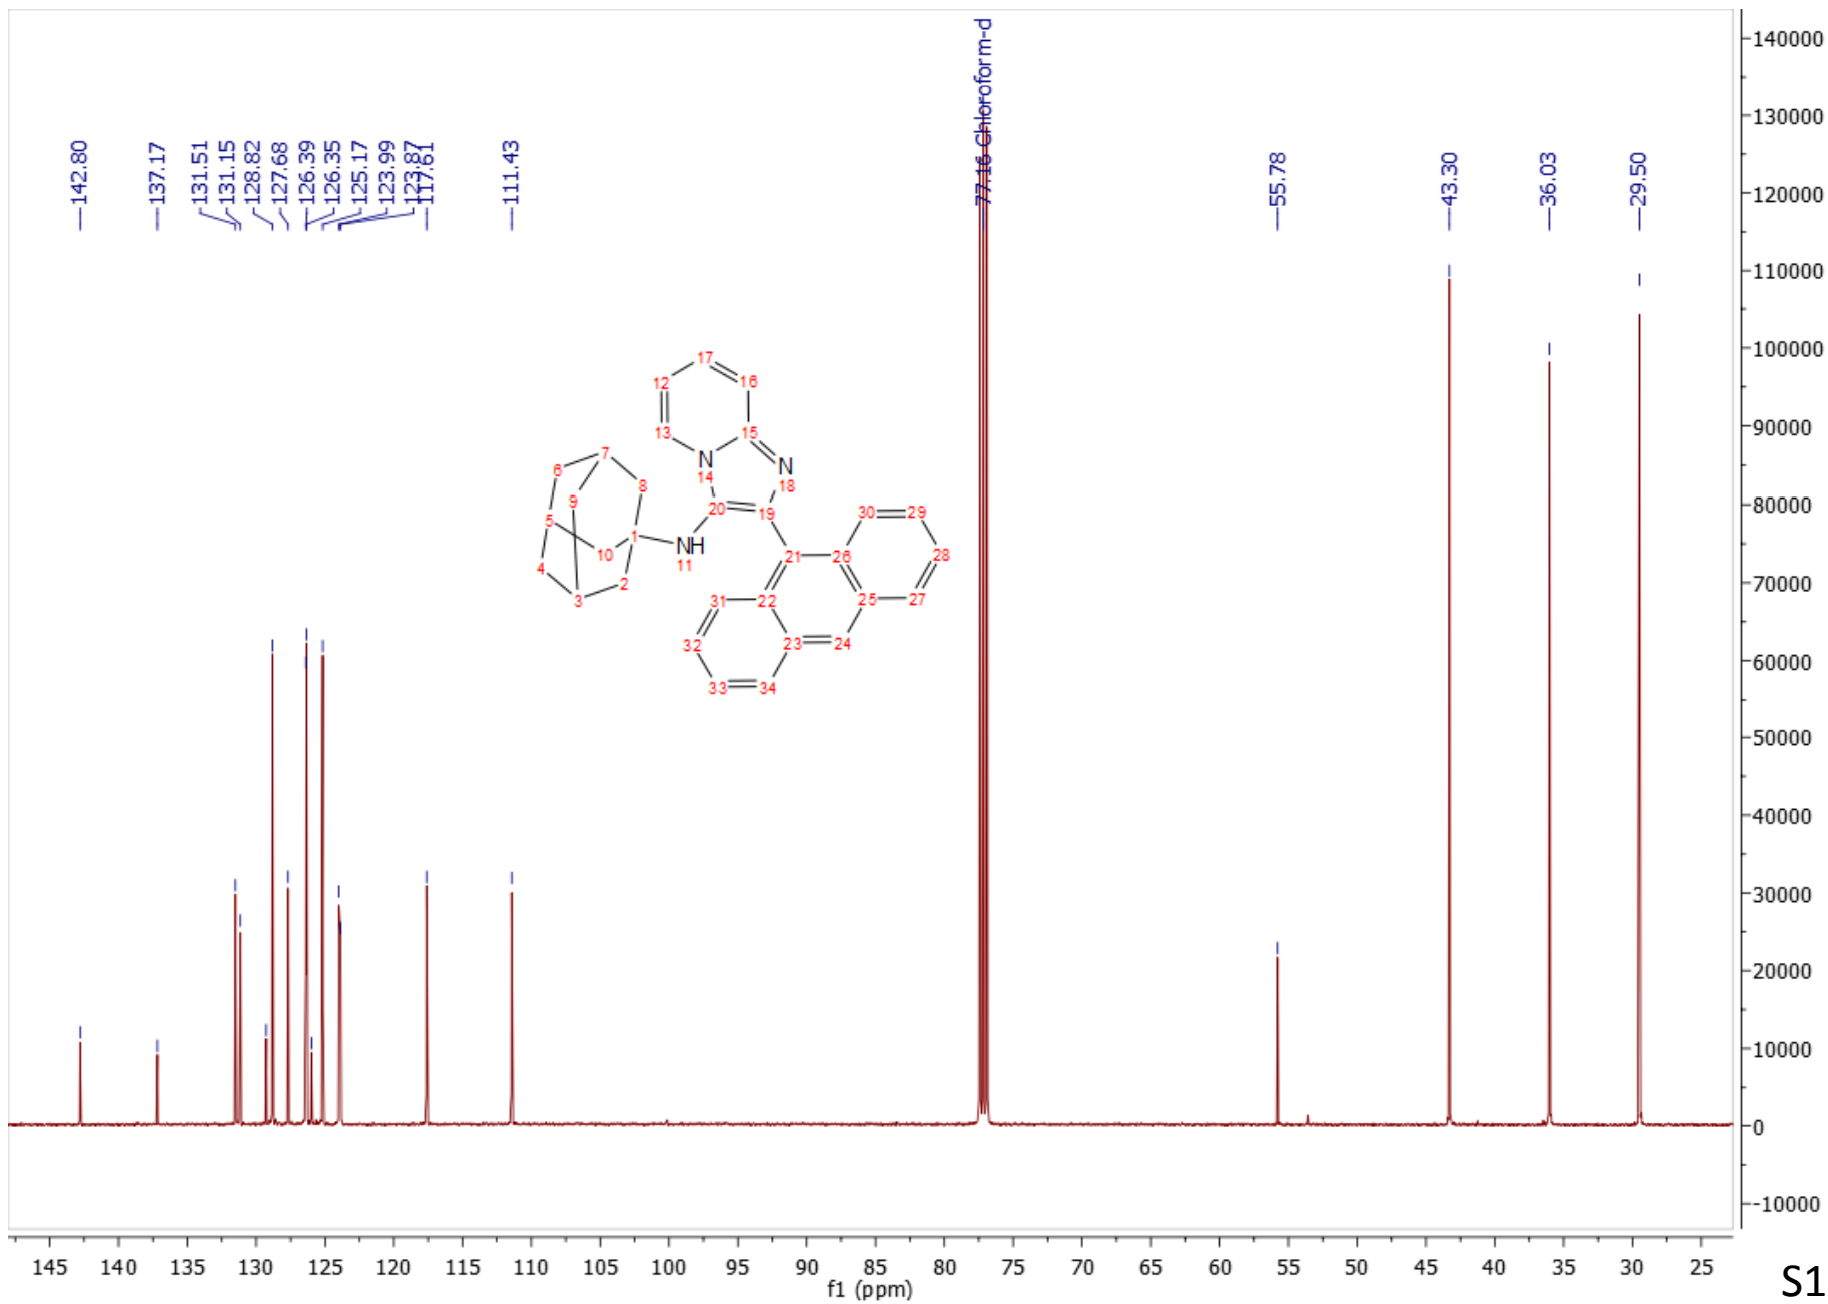

# 5g LC-MS

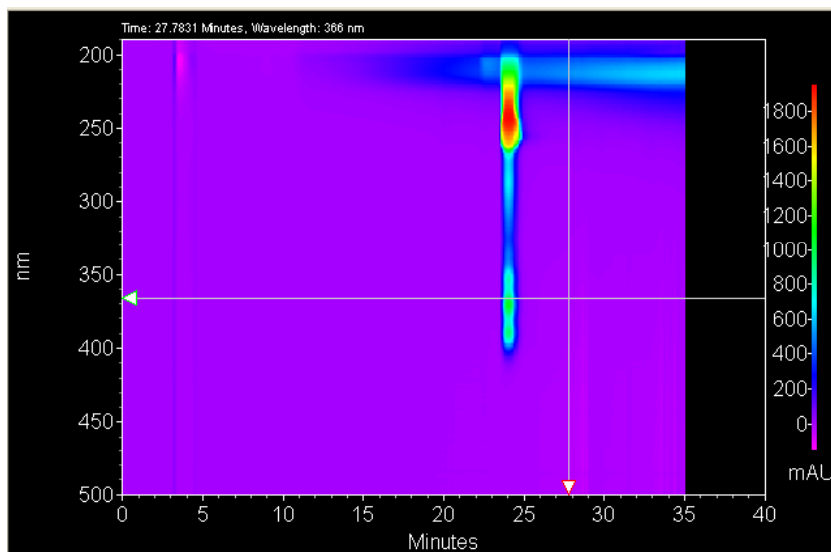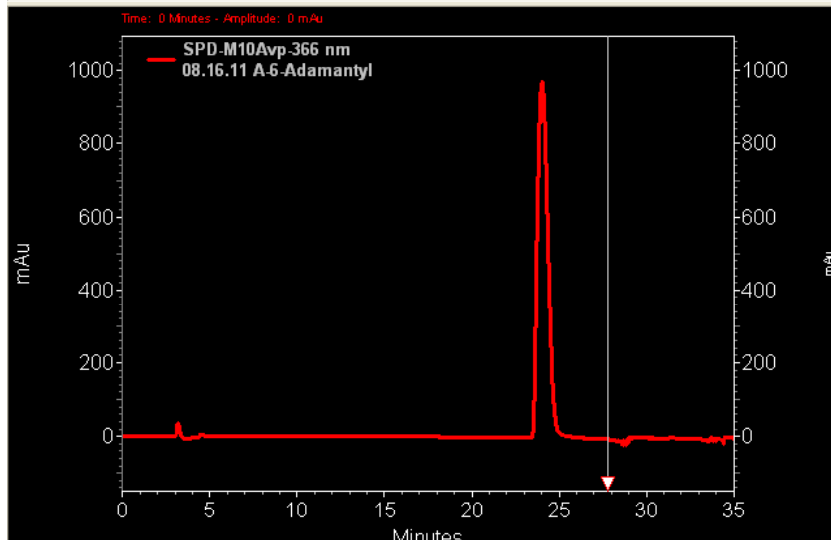

| Sample Name   | Injection            | Position    | Injection   | Instrument Name | Sample Type                       | User Name     | IRMS Calibration Status | Success     |
|---------------|----------------------|-------------|-------------|-----------------|-----------------------------------|---------------|-------------------------|-------------|
| Unavailable   | Unavailable          | Unavailable | Unavailable | Unavailable     | Unavailable                       | Unavailable   | Unavailable             | Unavailable |
| Data Filename | 01.18.12 A6adamantyl | ACQ Method  |             | Comment         | Sample information is unavailable | Acquired Time |                         | Unavailable |

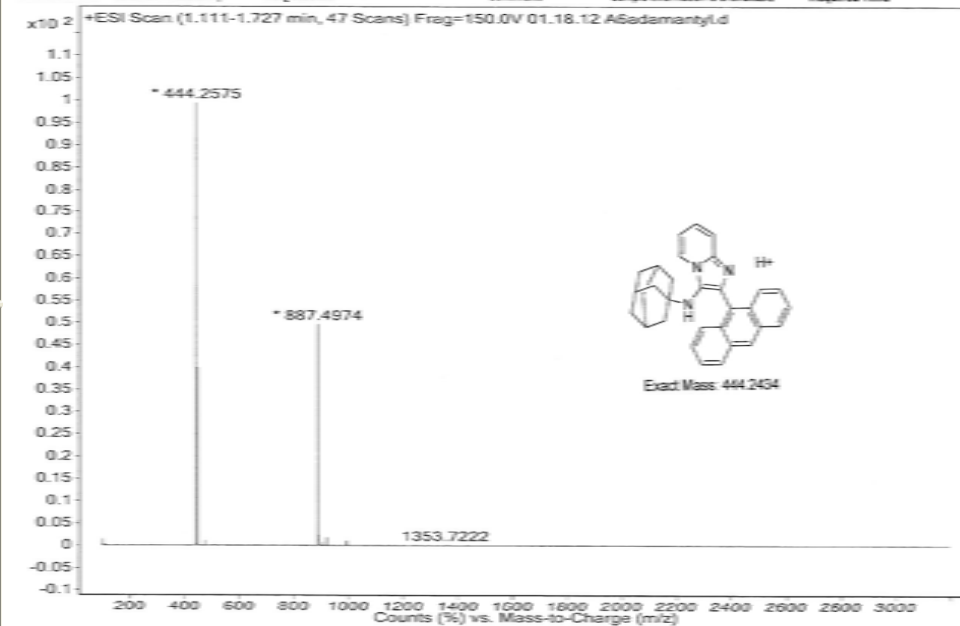

# 5h <sup>1</sup>H Spectrum

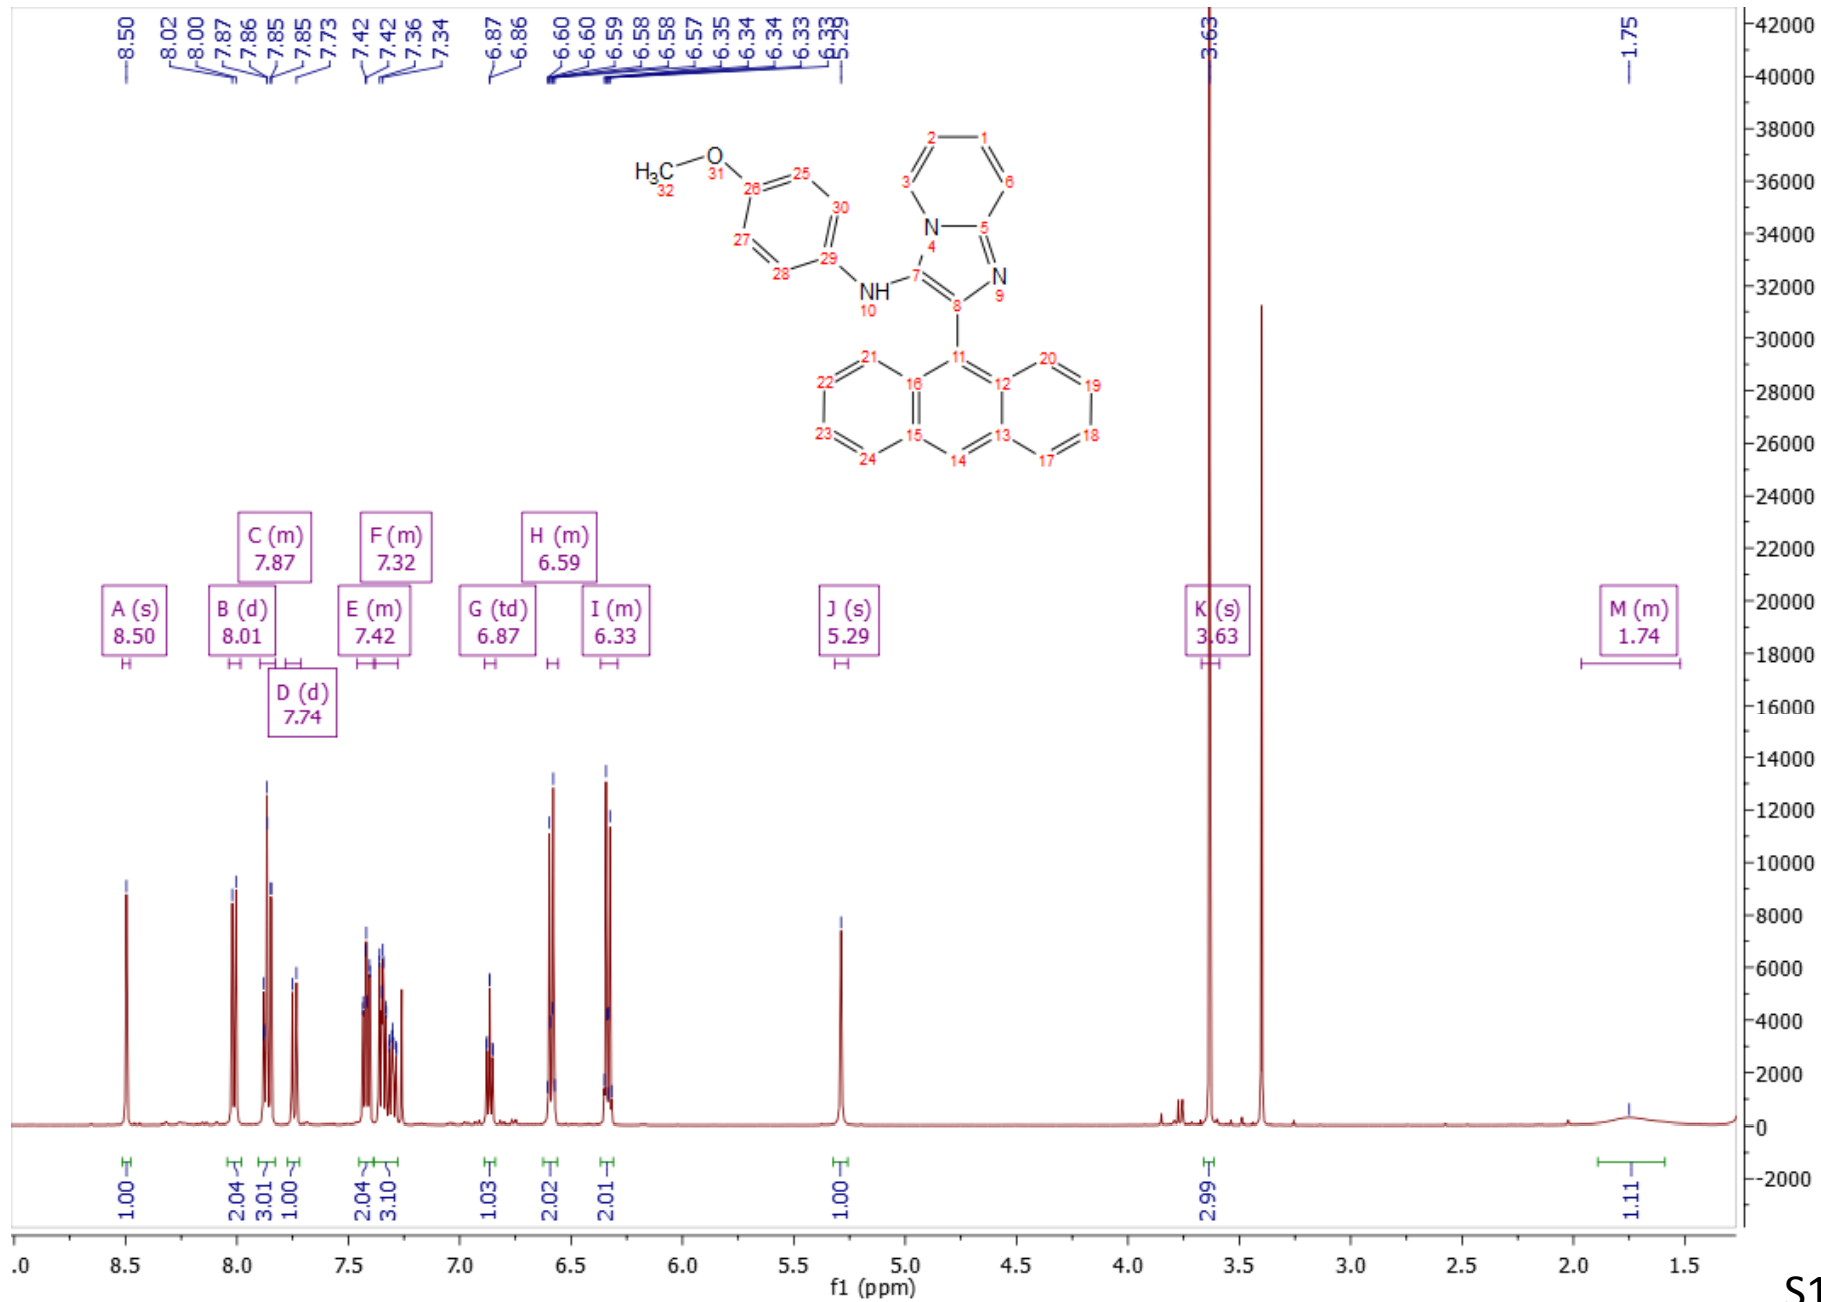



# 5h <sup>13</sup>C Spectrum

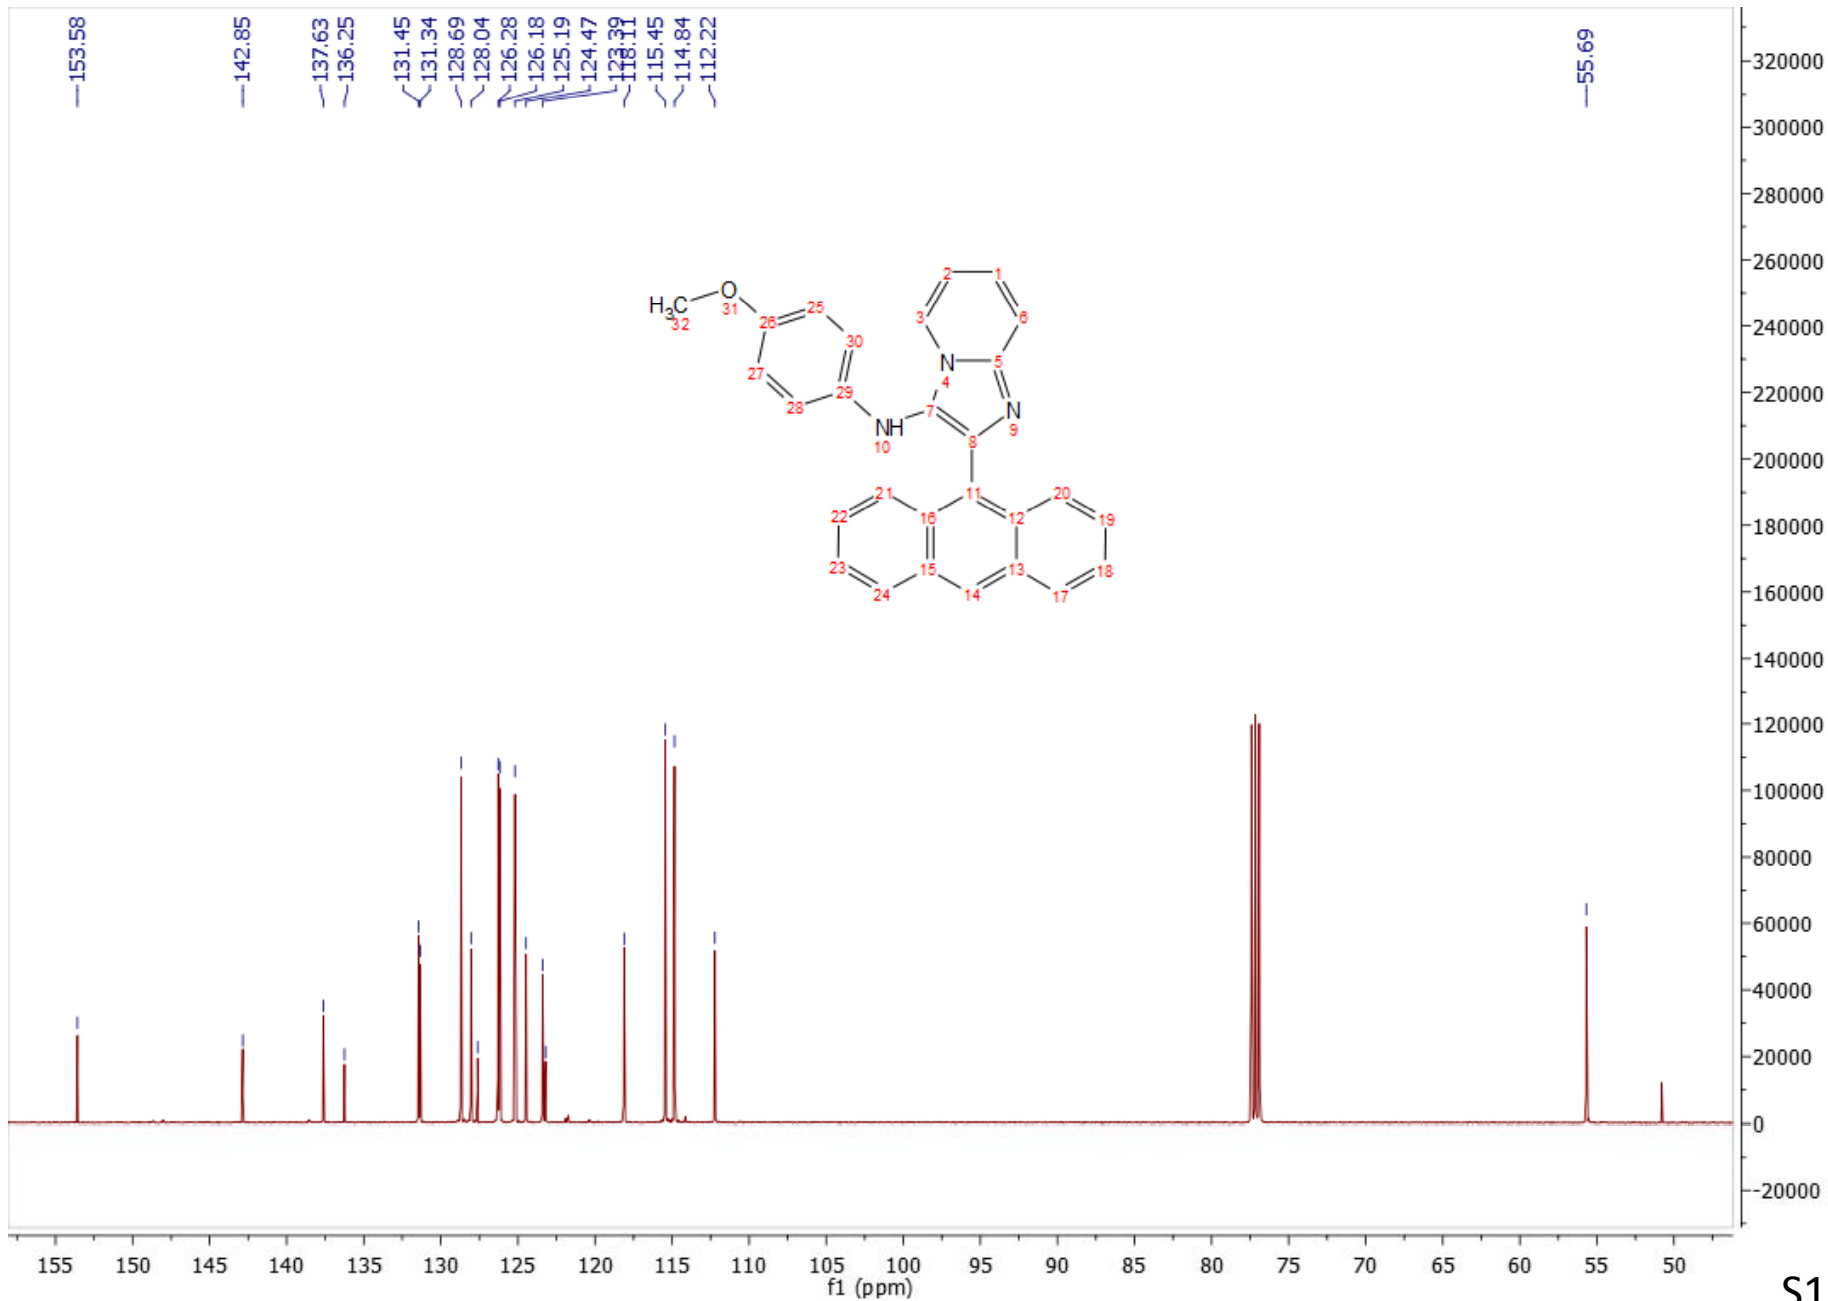

# 5h LC-MS

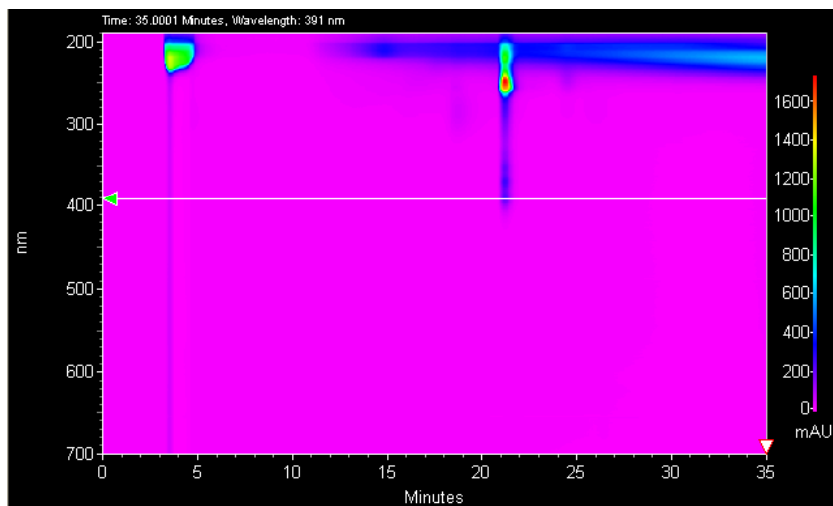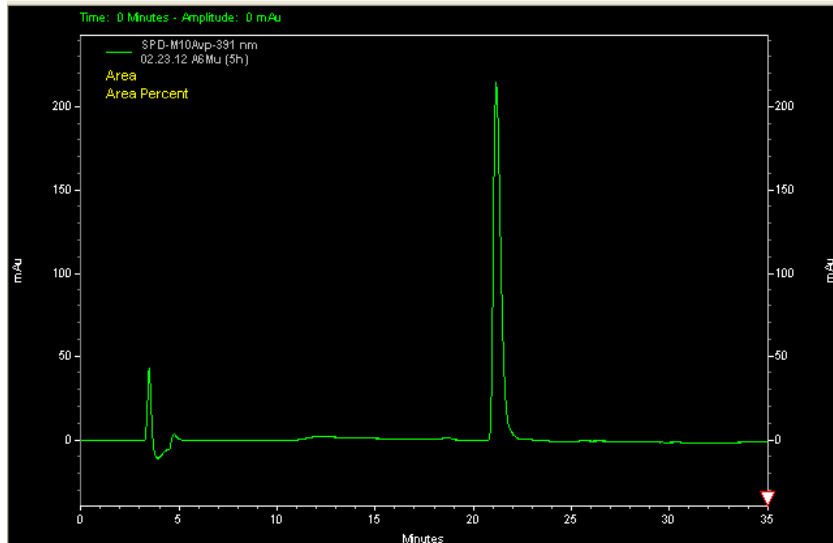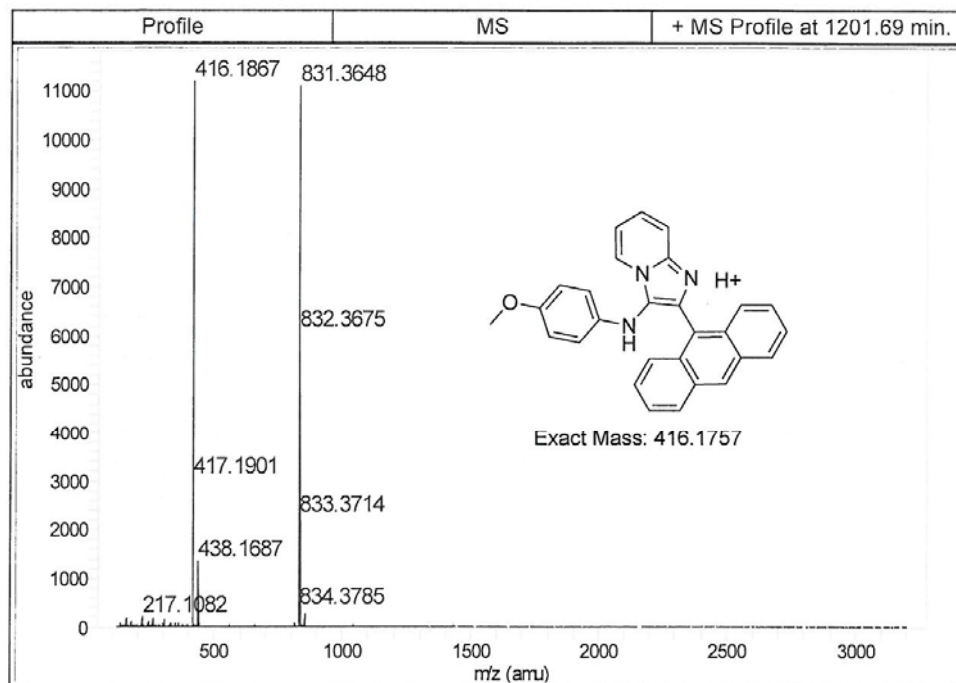

# 5i <sup>1</sup>H Spectrum

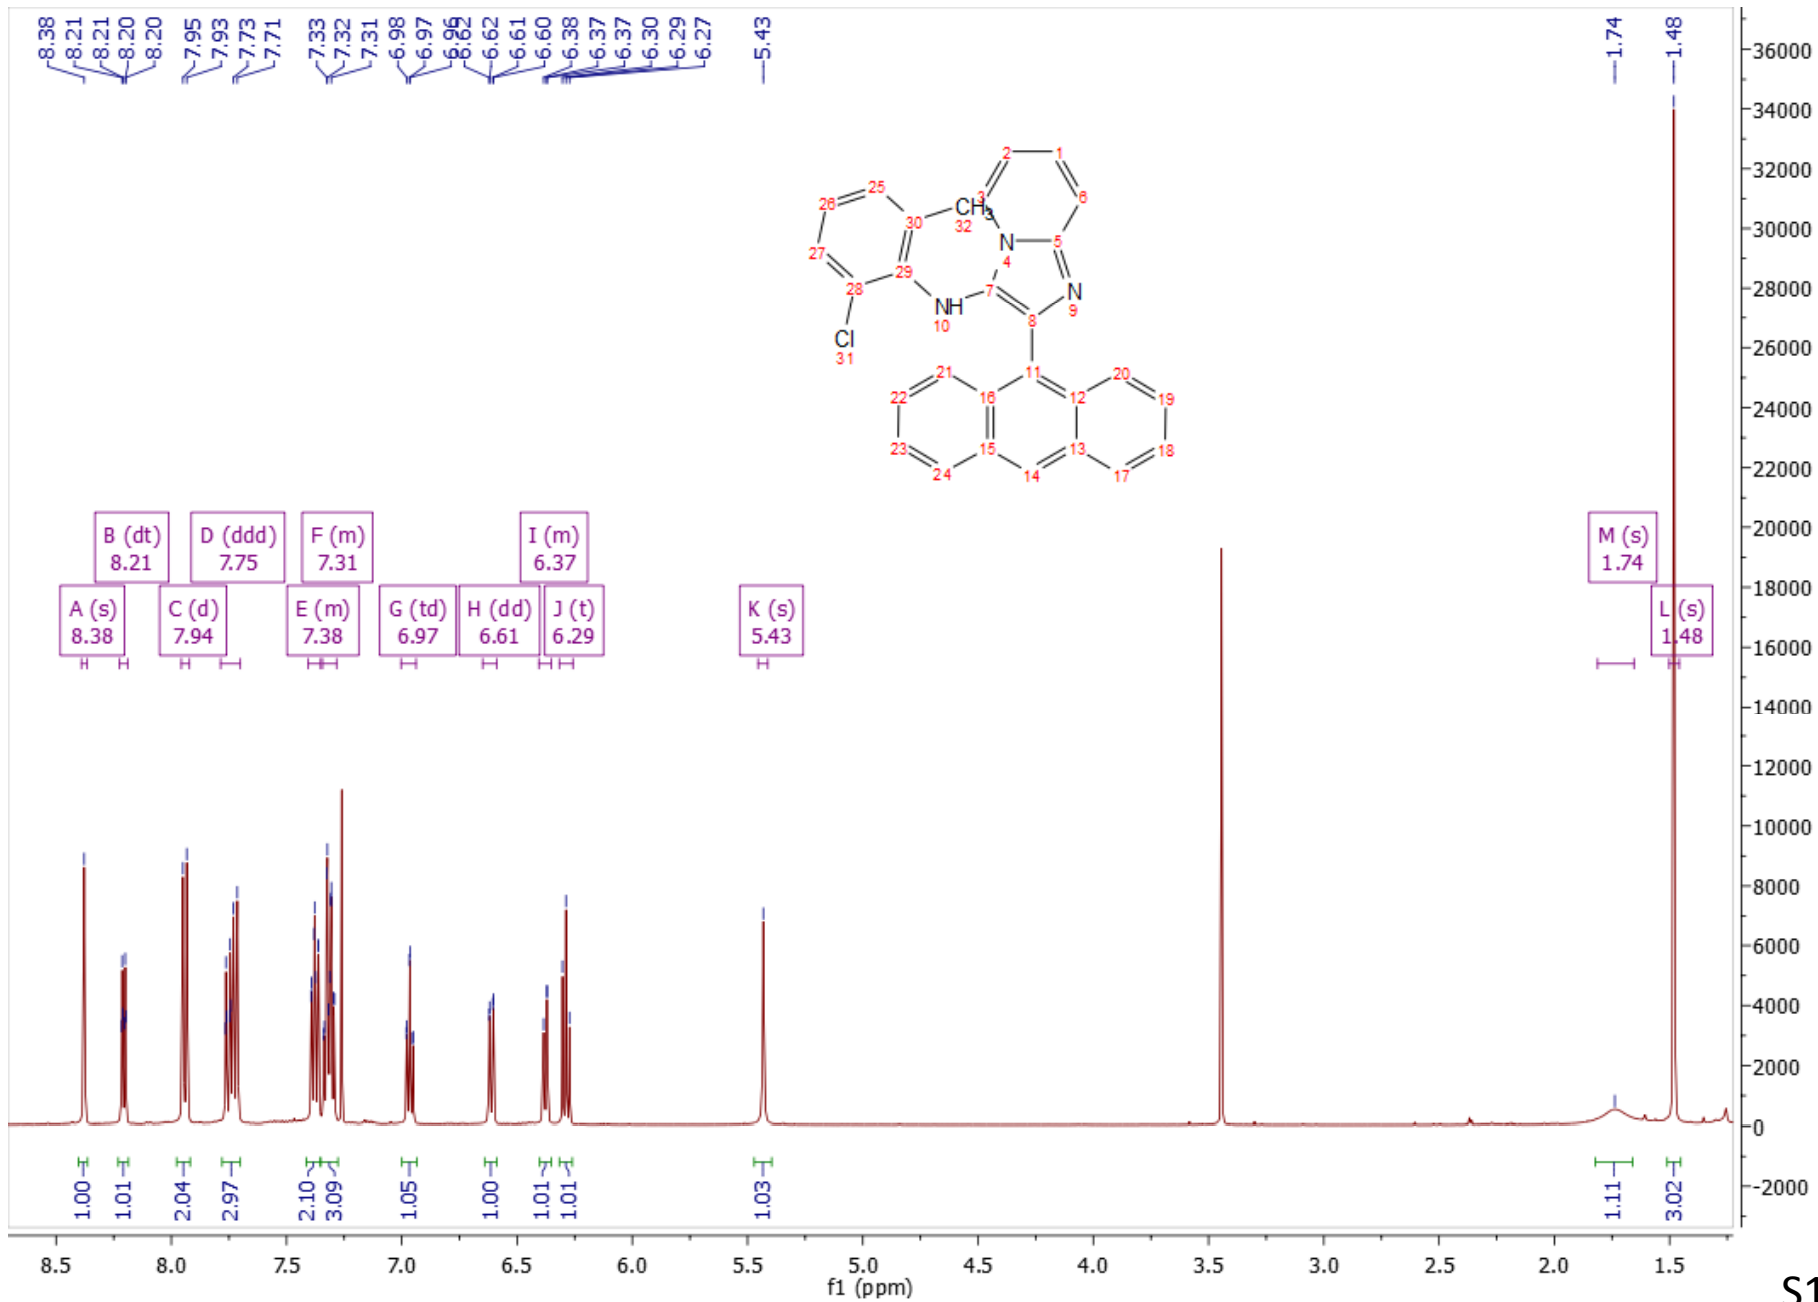

# 5i <sup>13</sup>C Spectrum

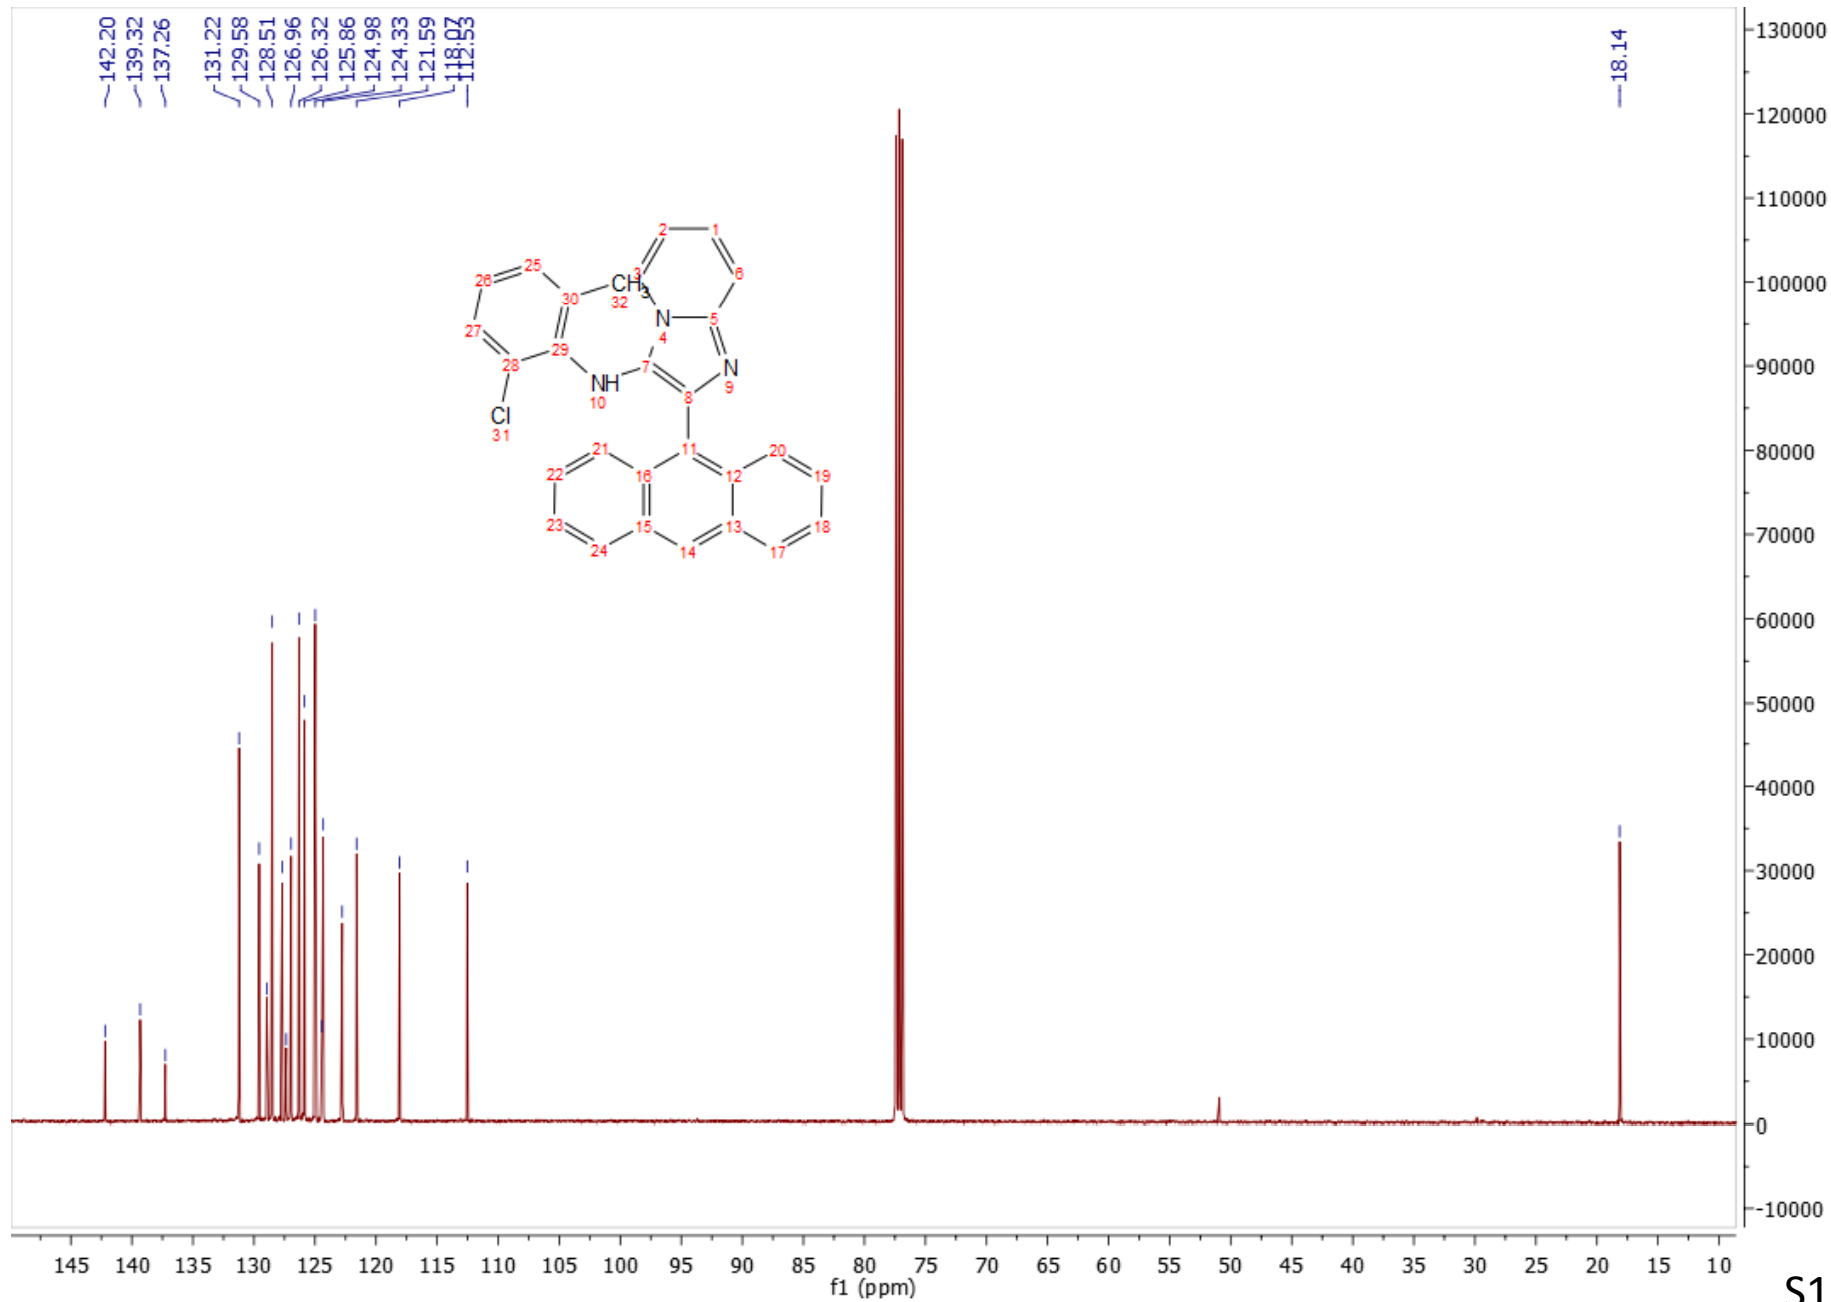

# 5i LC-MS

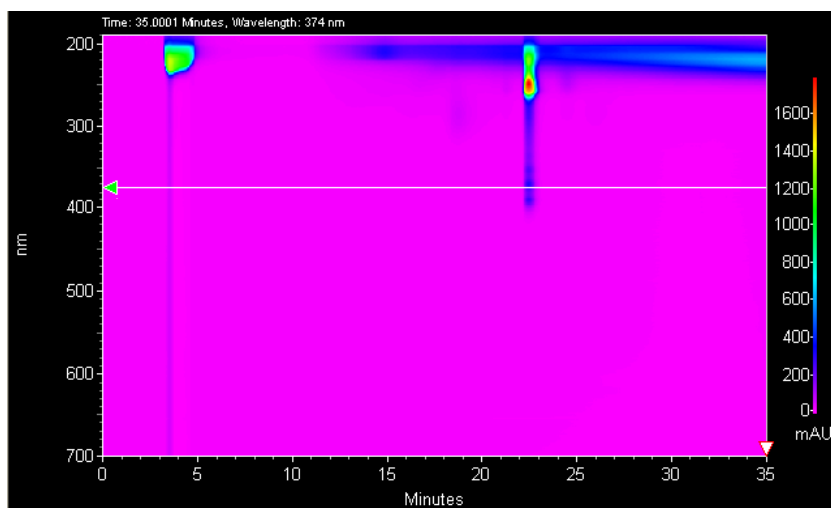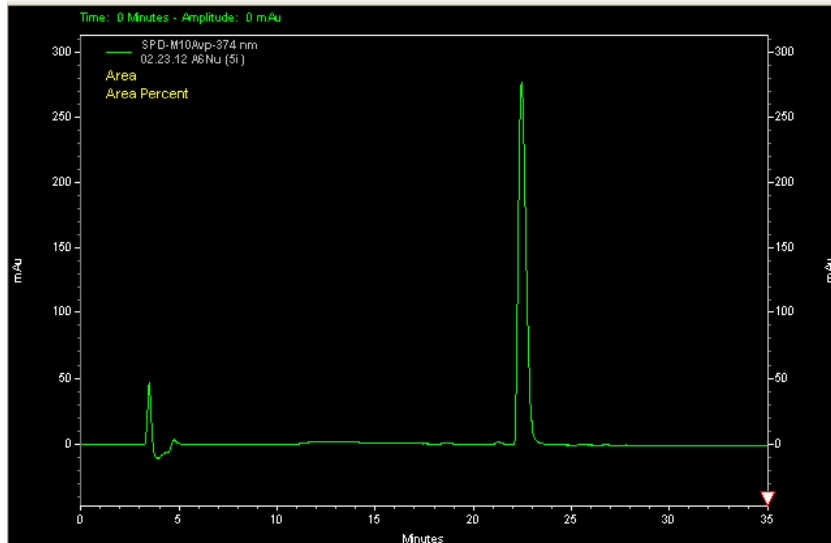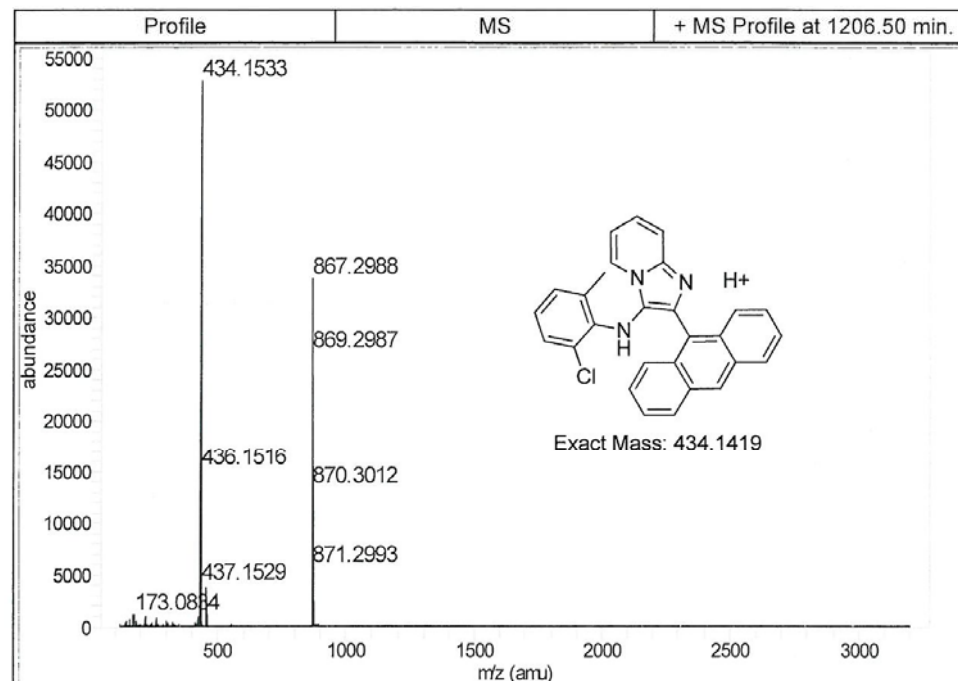

# 6 <sup>1</sup>H Spectrum

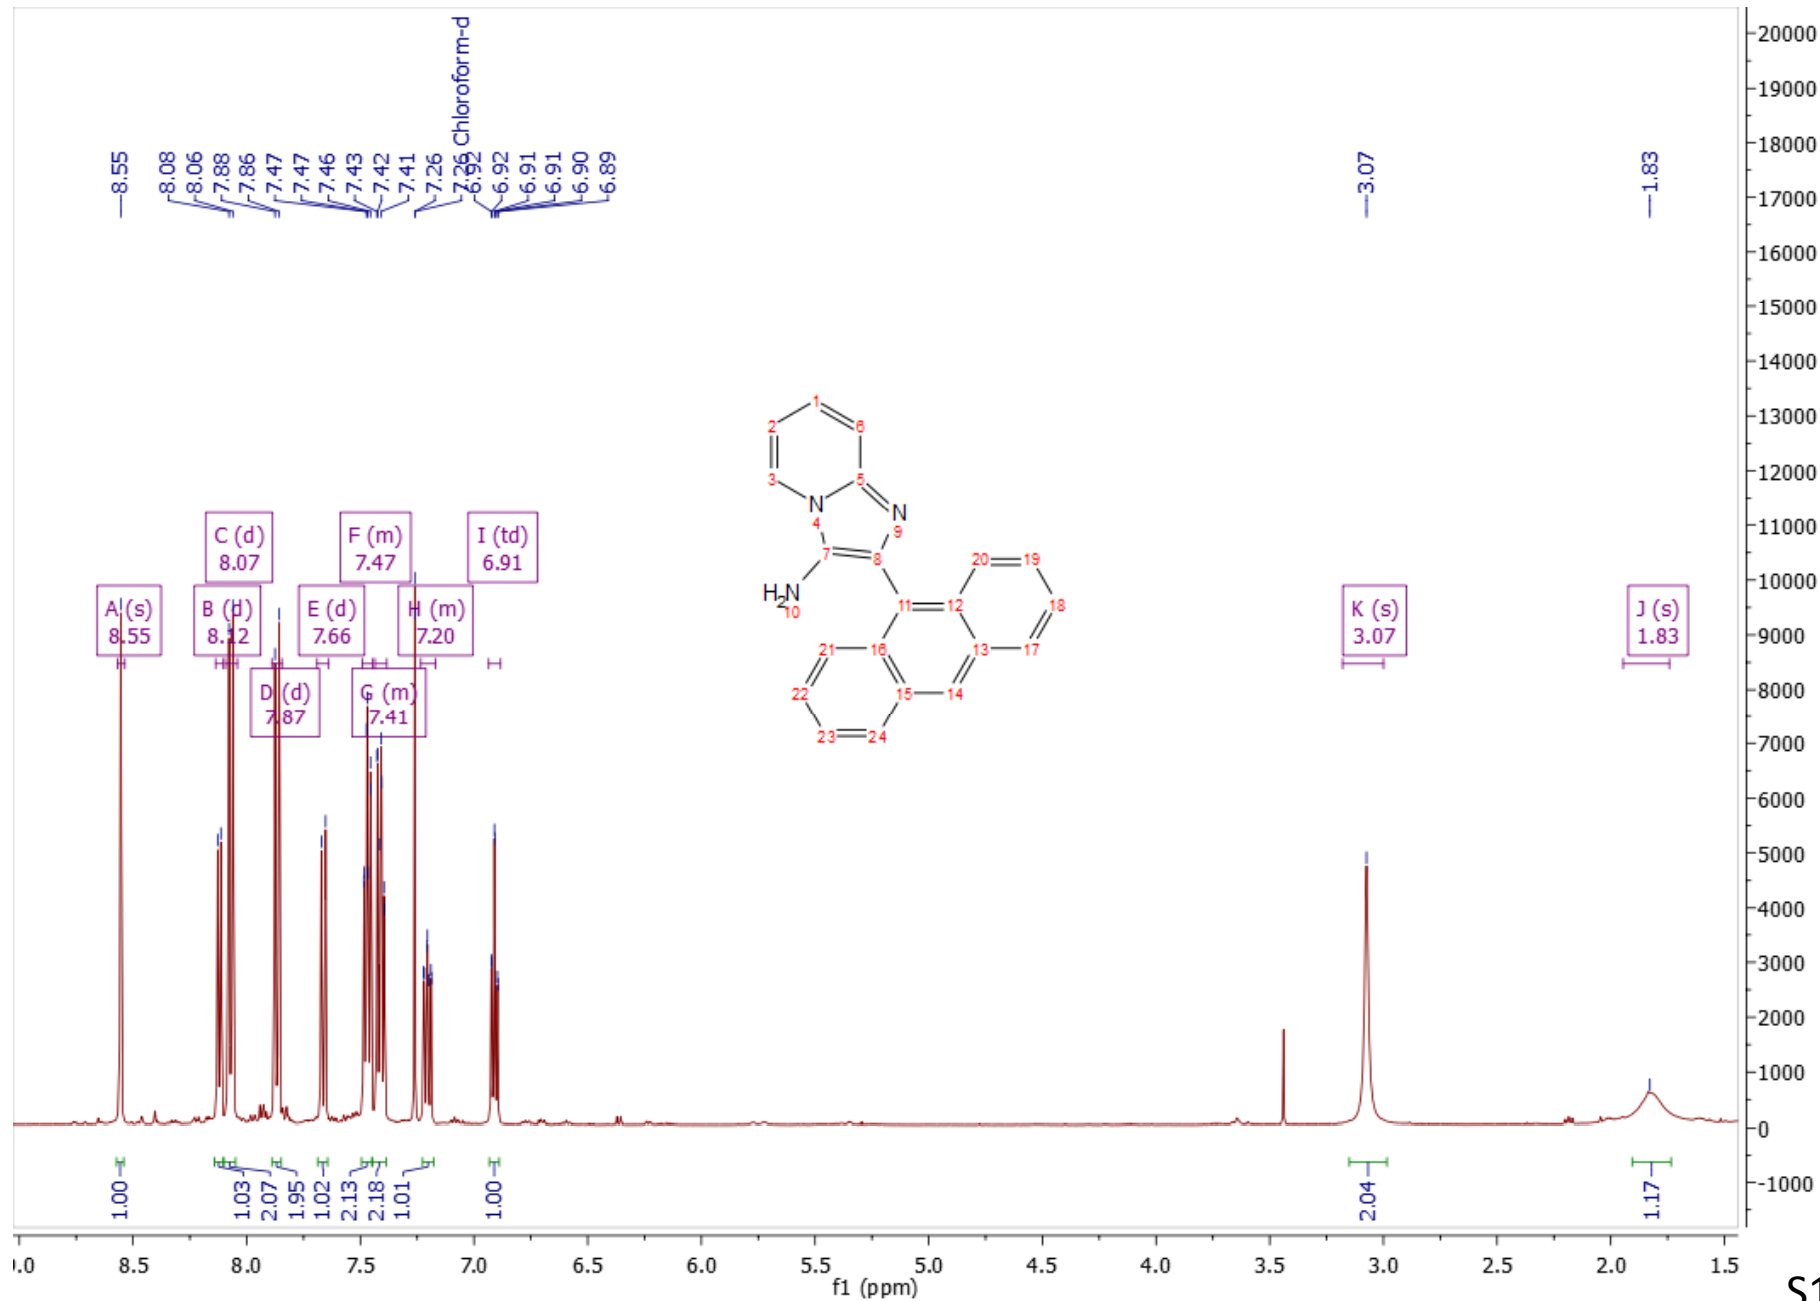

# 6 <sup>13</sup>C Spectrum

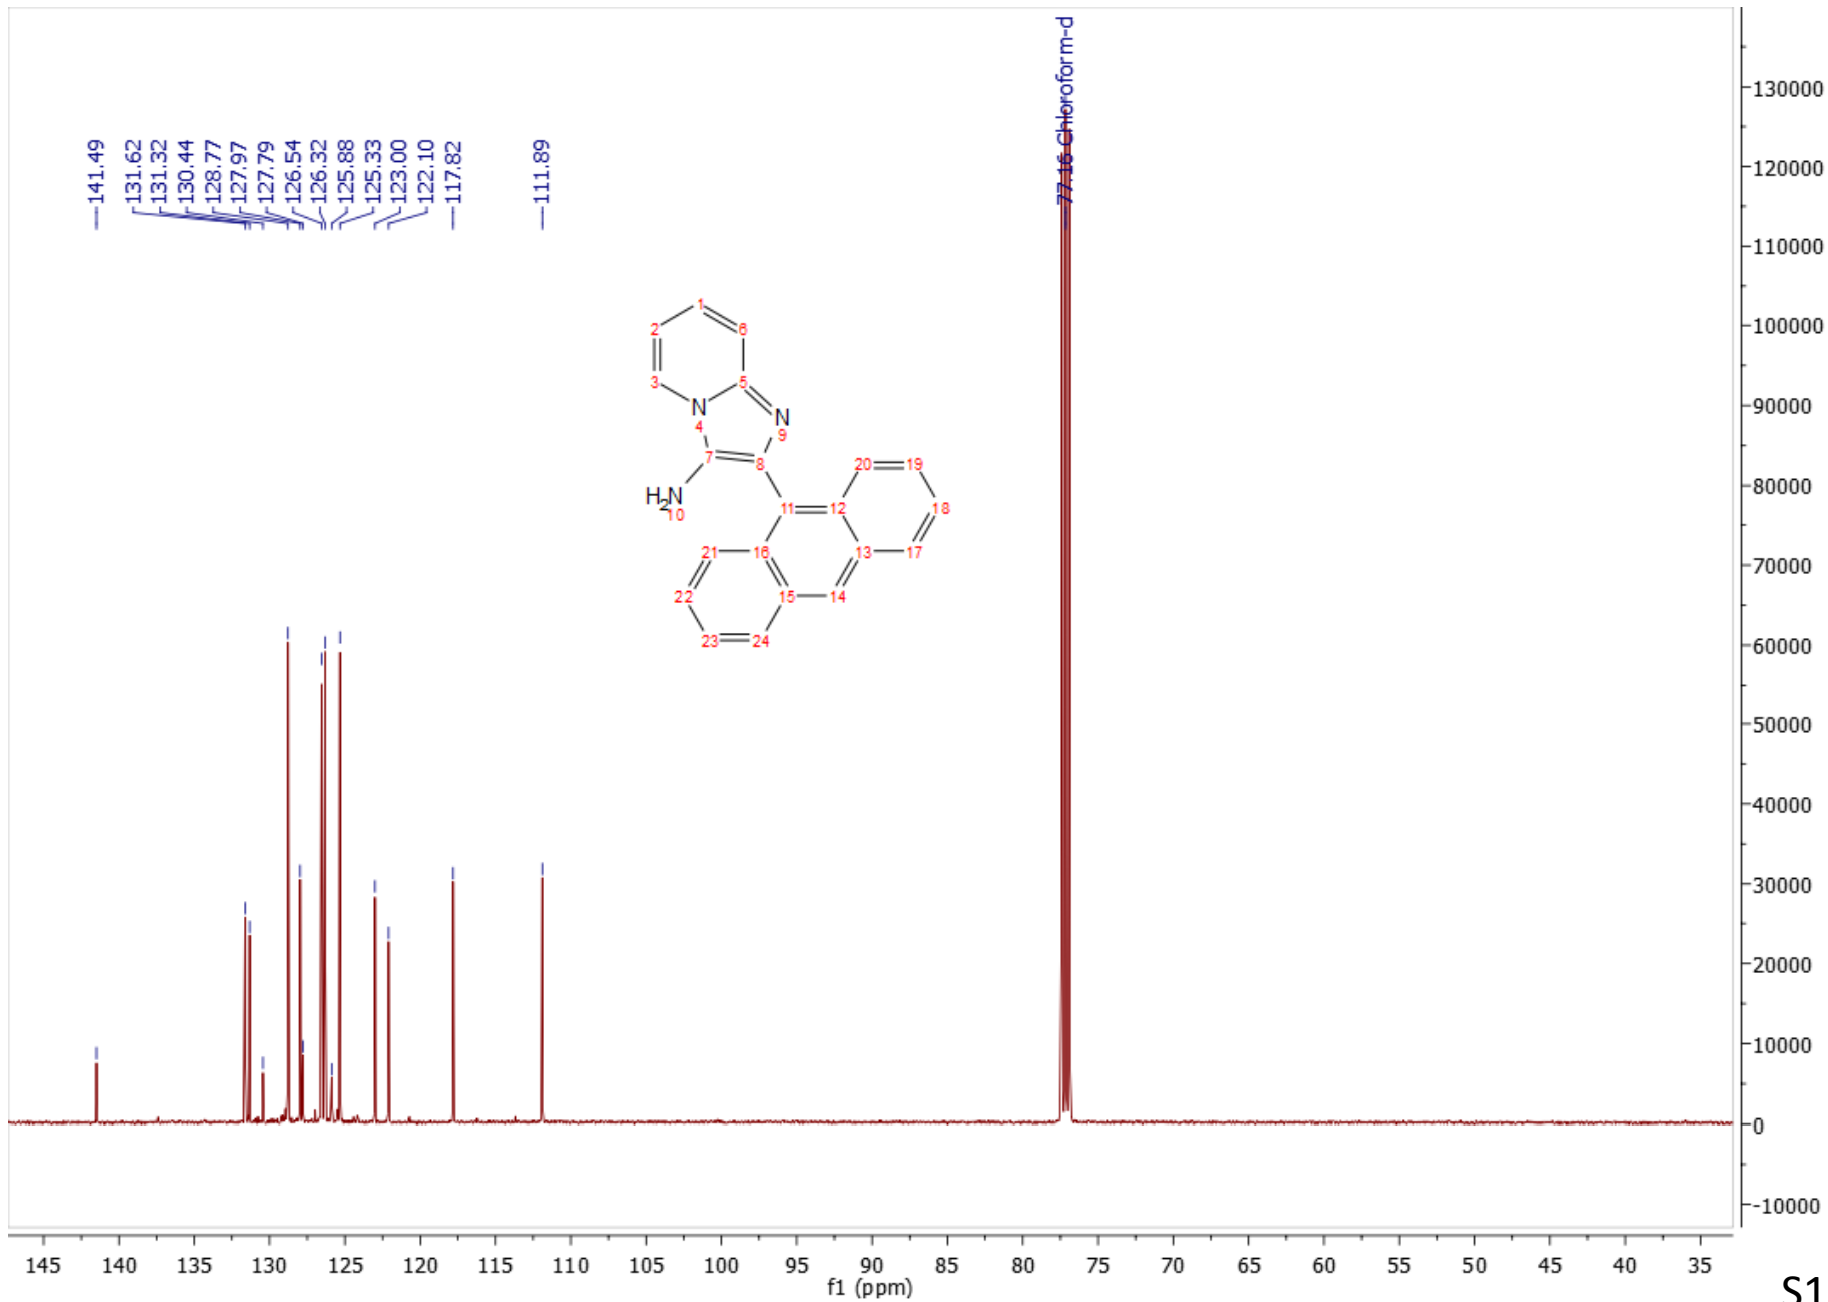

# 6 LC-MS

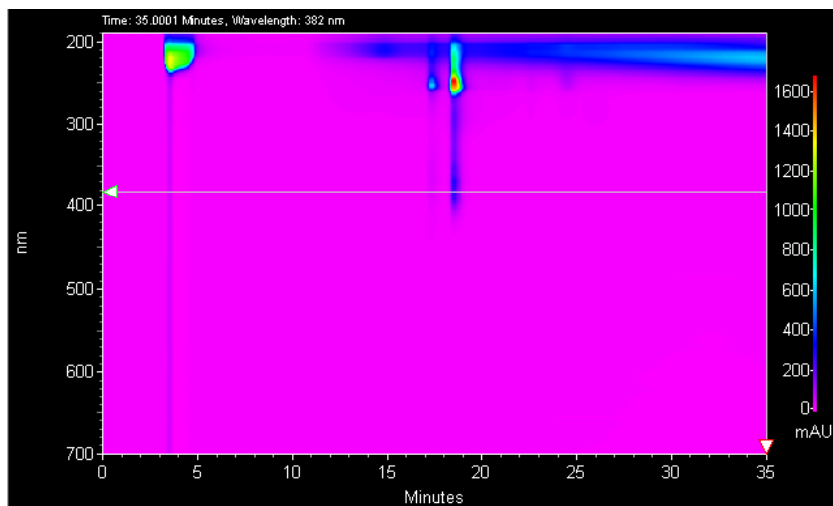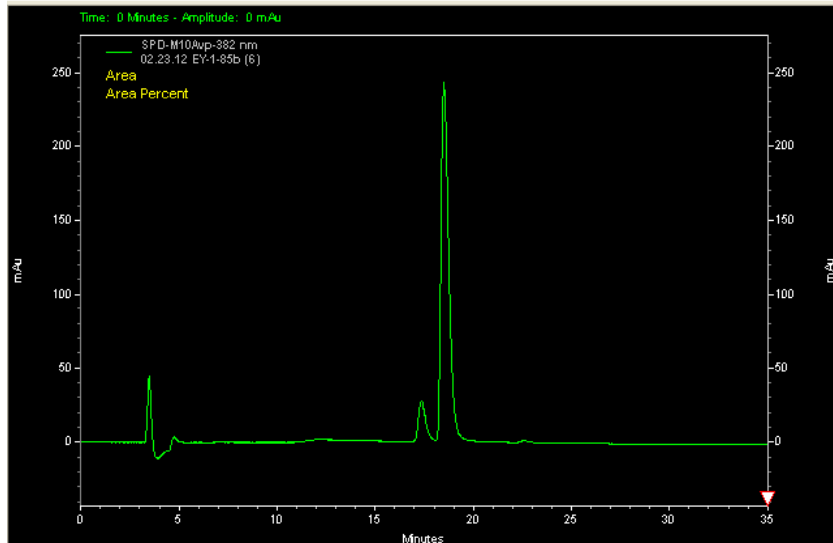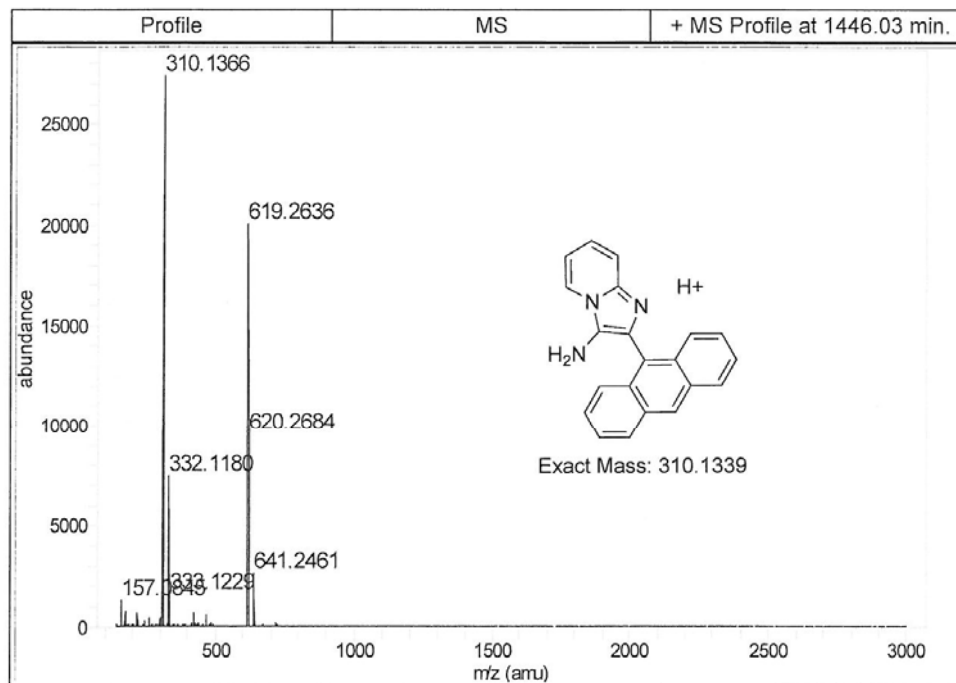



# 7a <sup>1</sup>H Spectrum

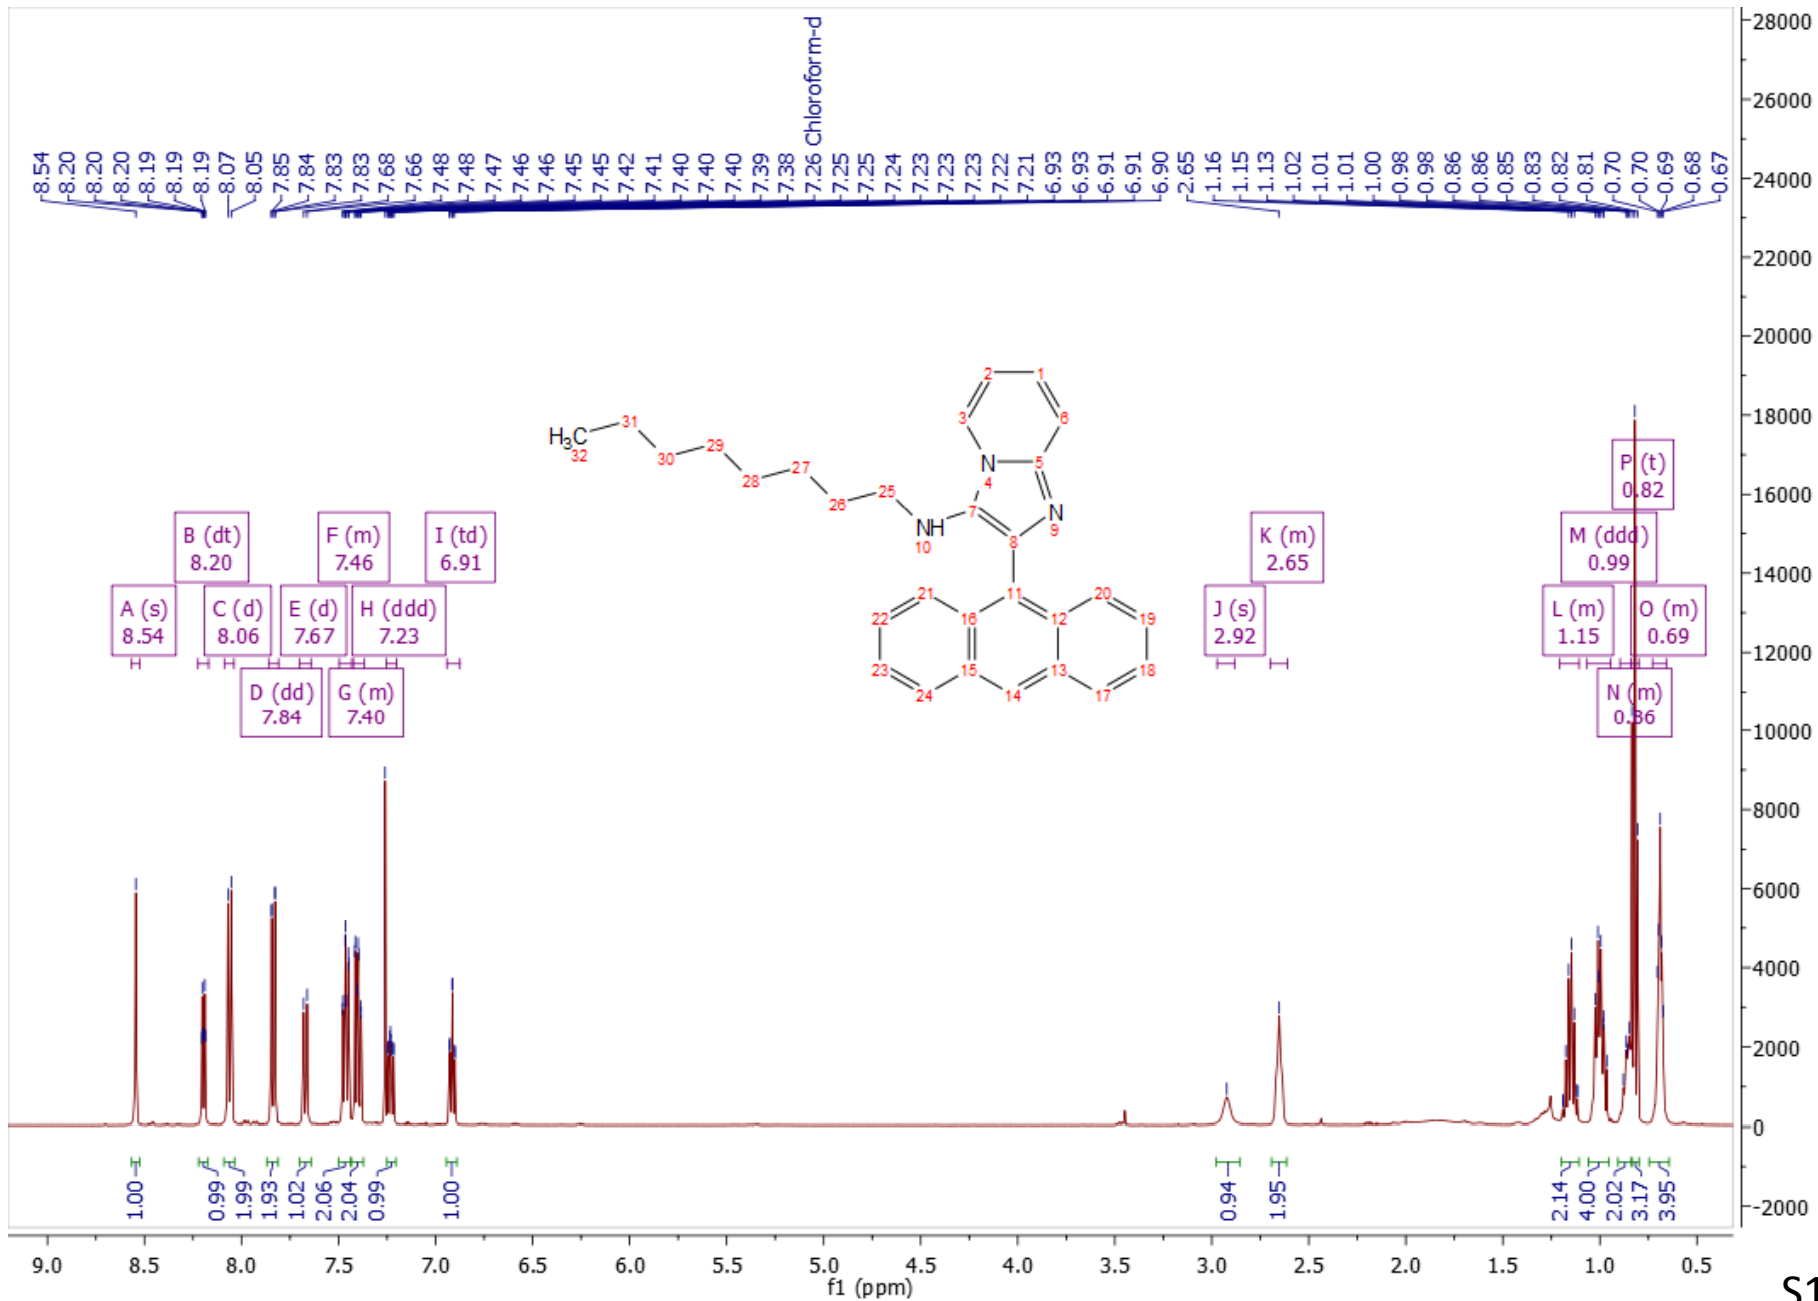

# 7a <sup>13</sup>C Spectrum

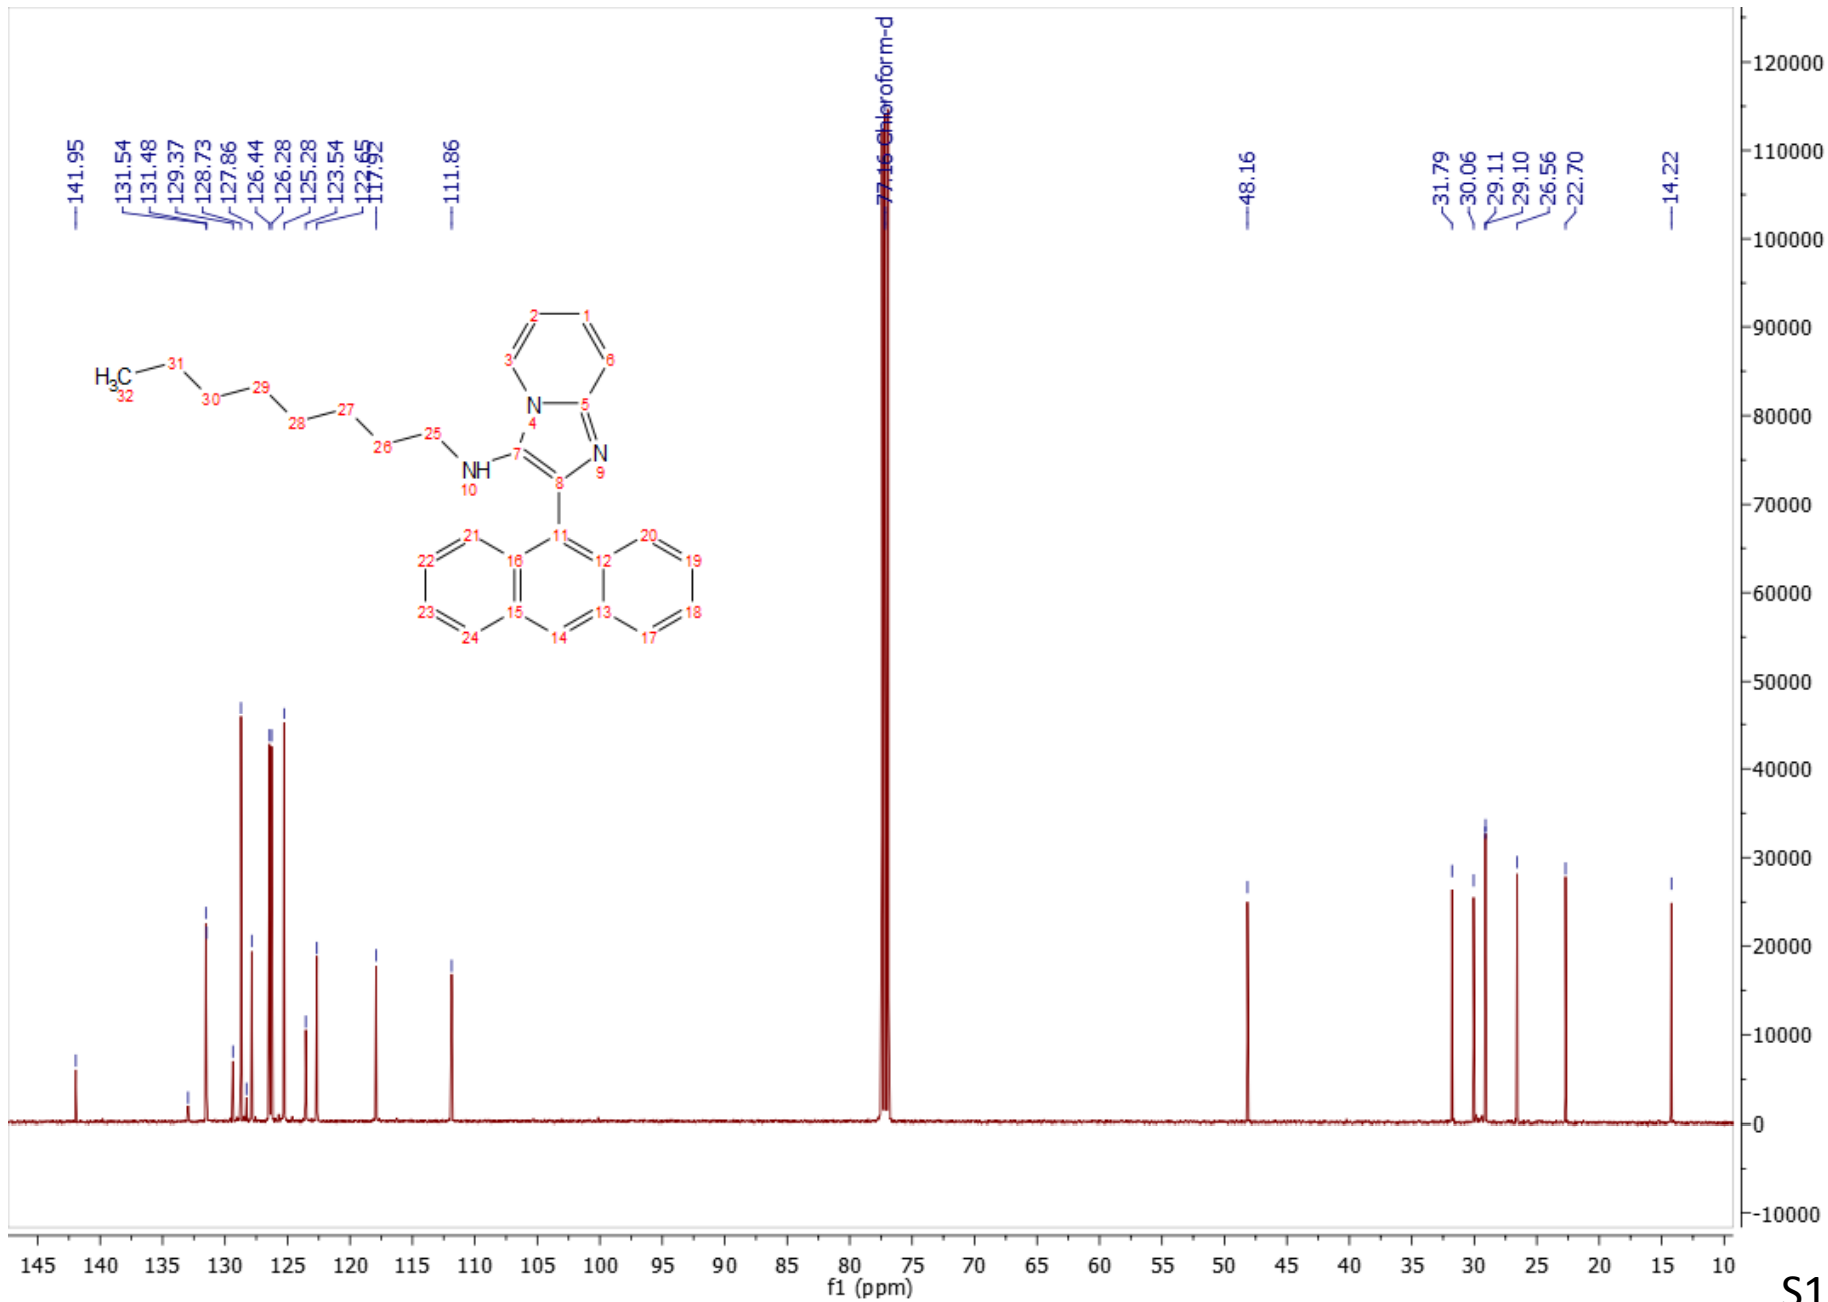

# 7a LC-MS

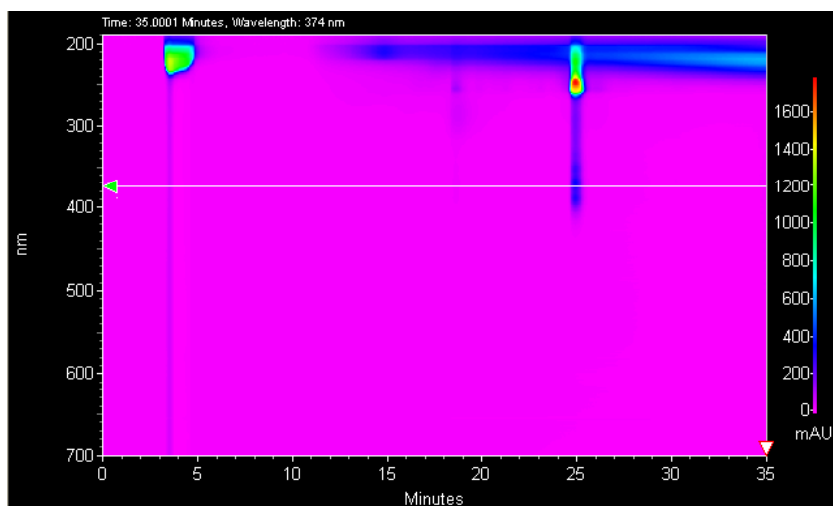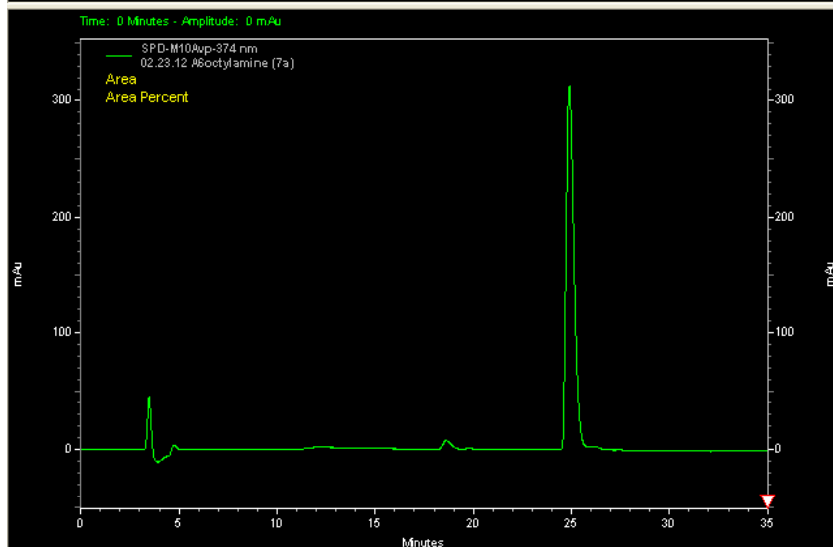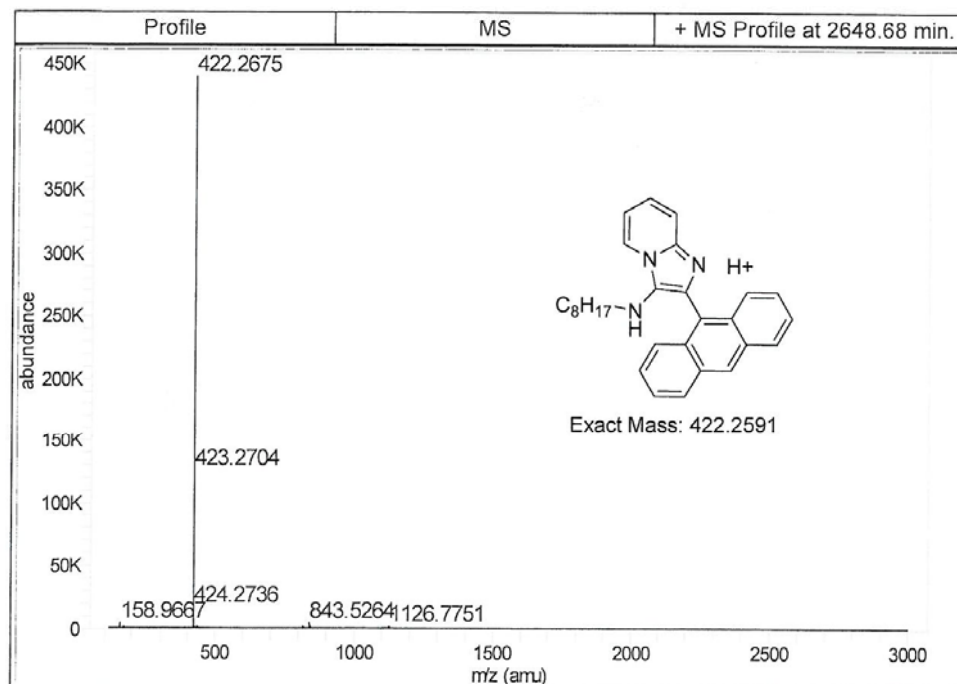

# 7b <sup>1</sup>H Spectrum

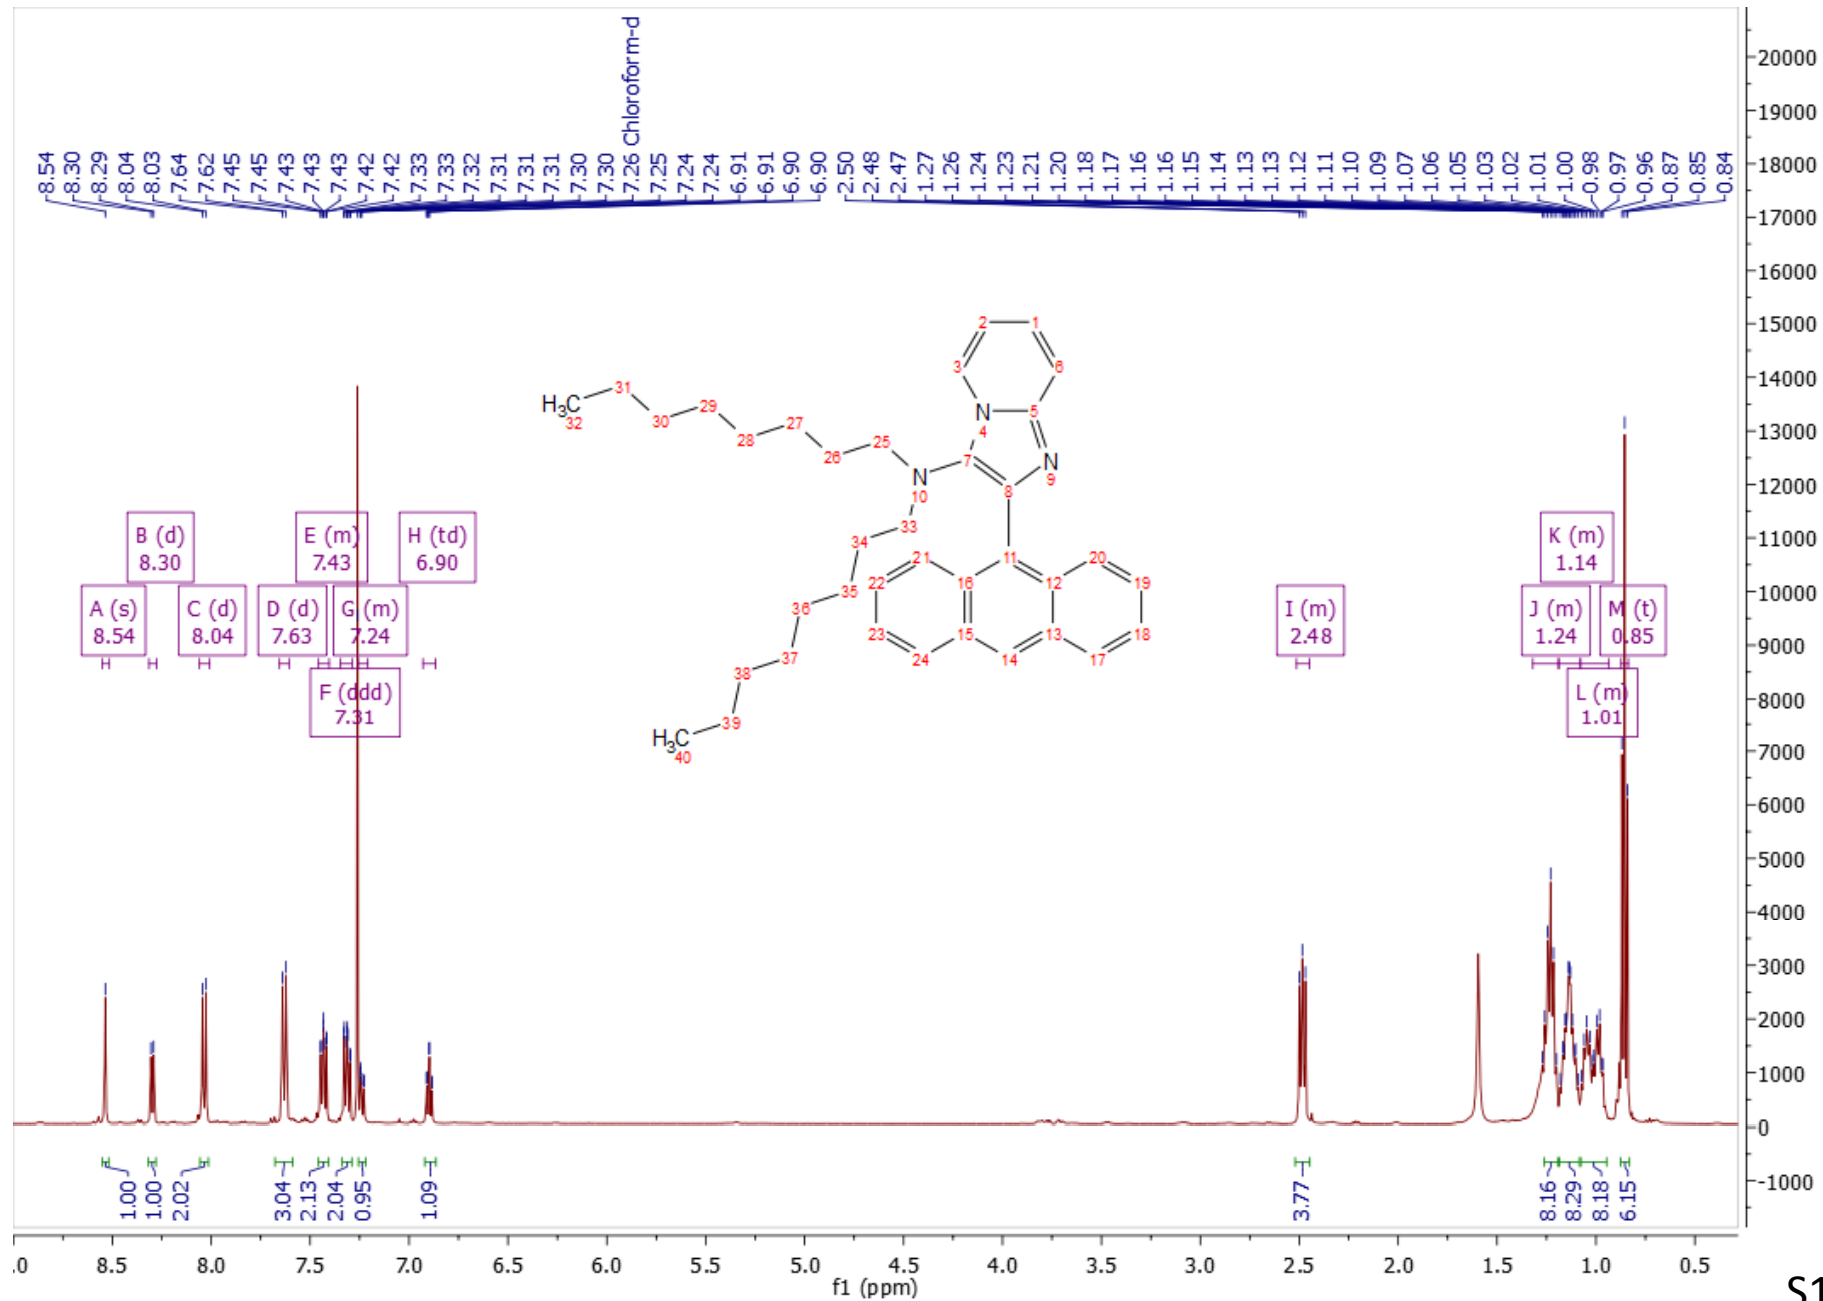

# 7b <sup>13</sup>C Spectrum

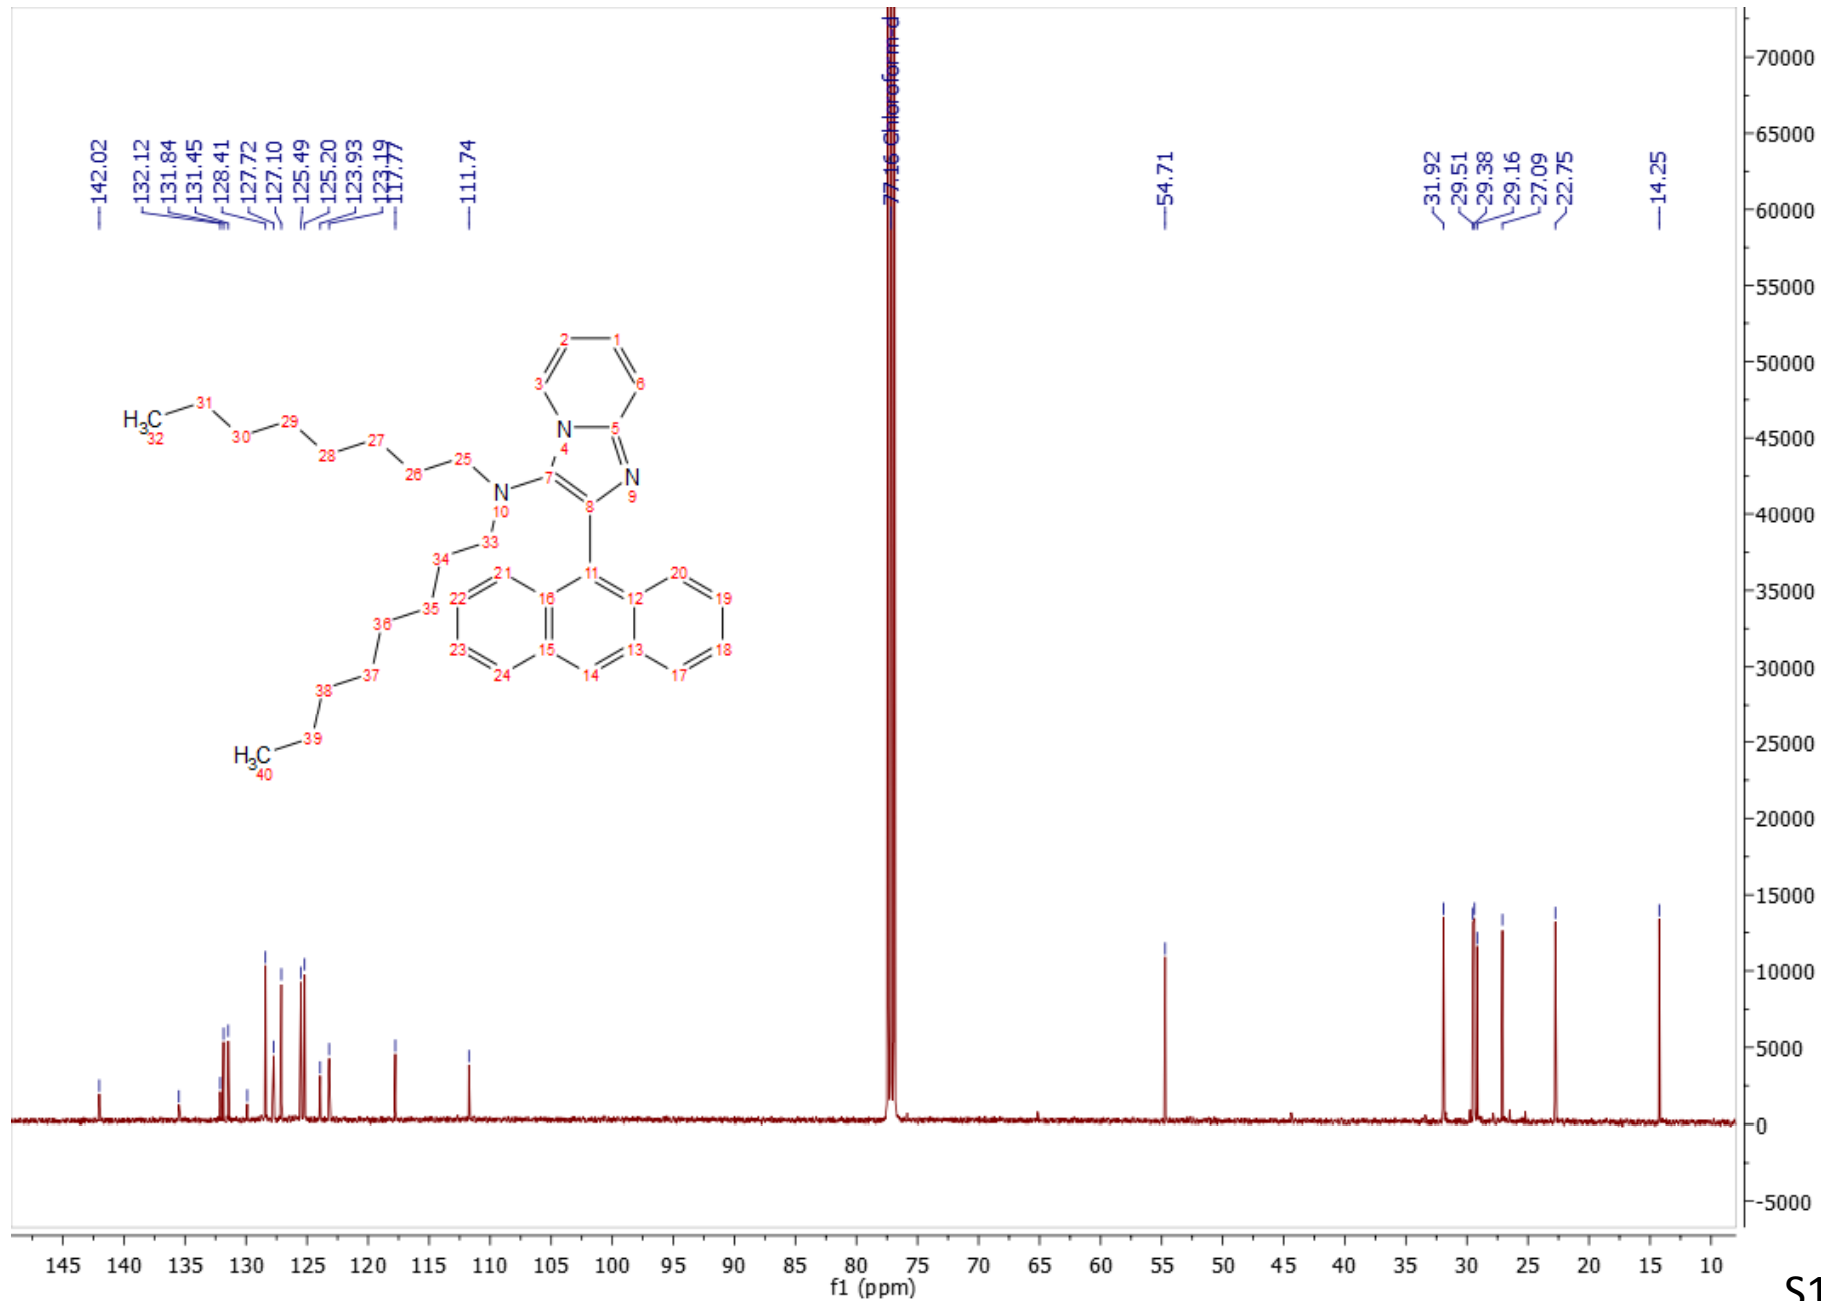

# 7b LC-MS

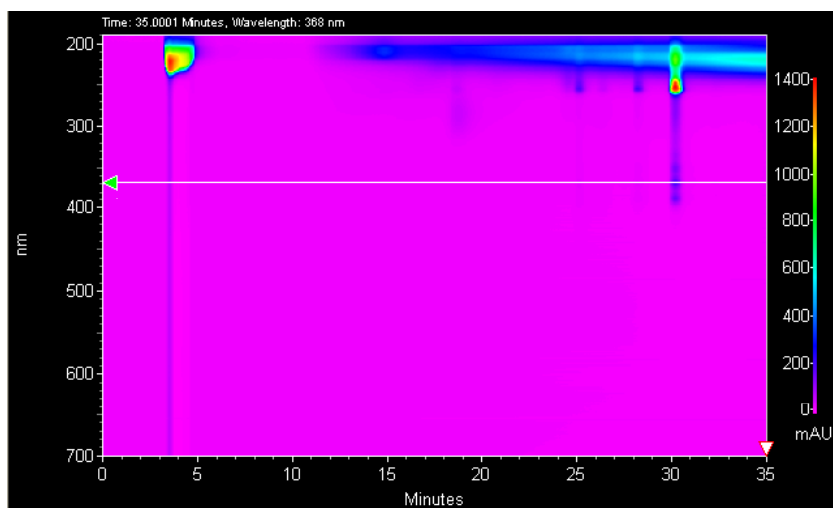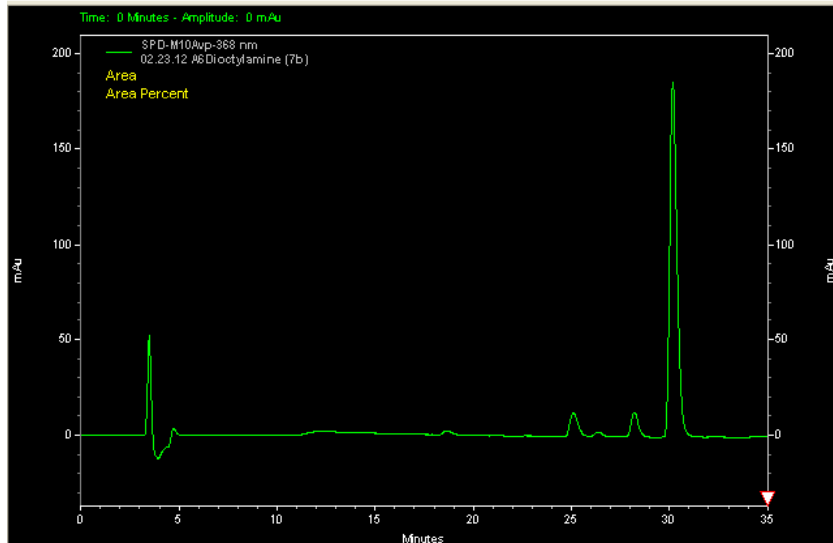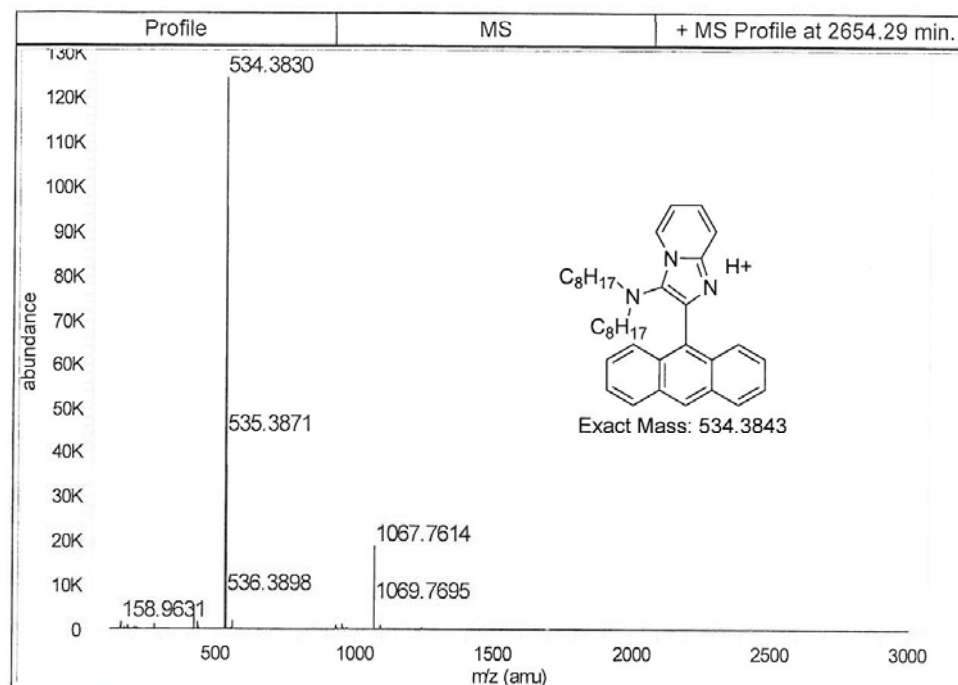

# 7c <sup>1</sup>H Spectrum

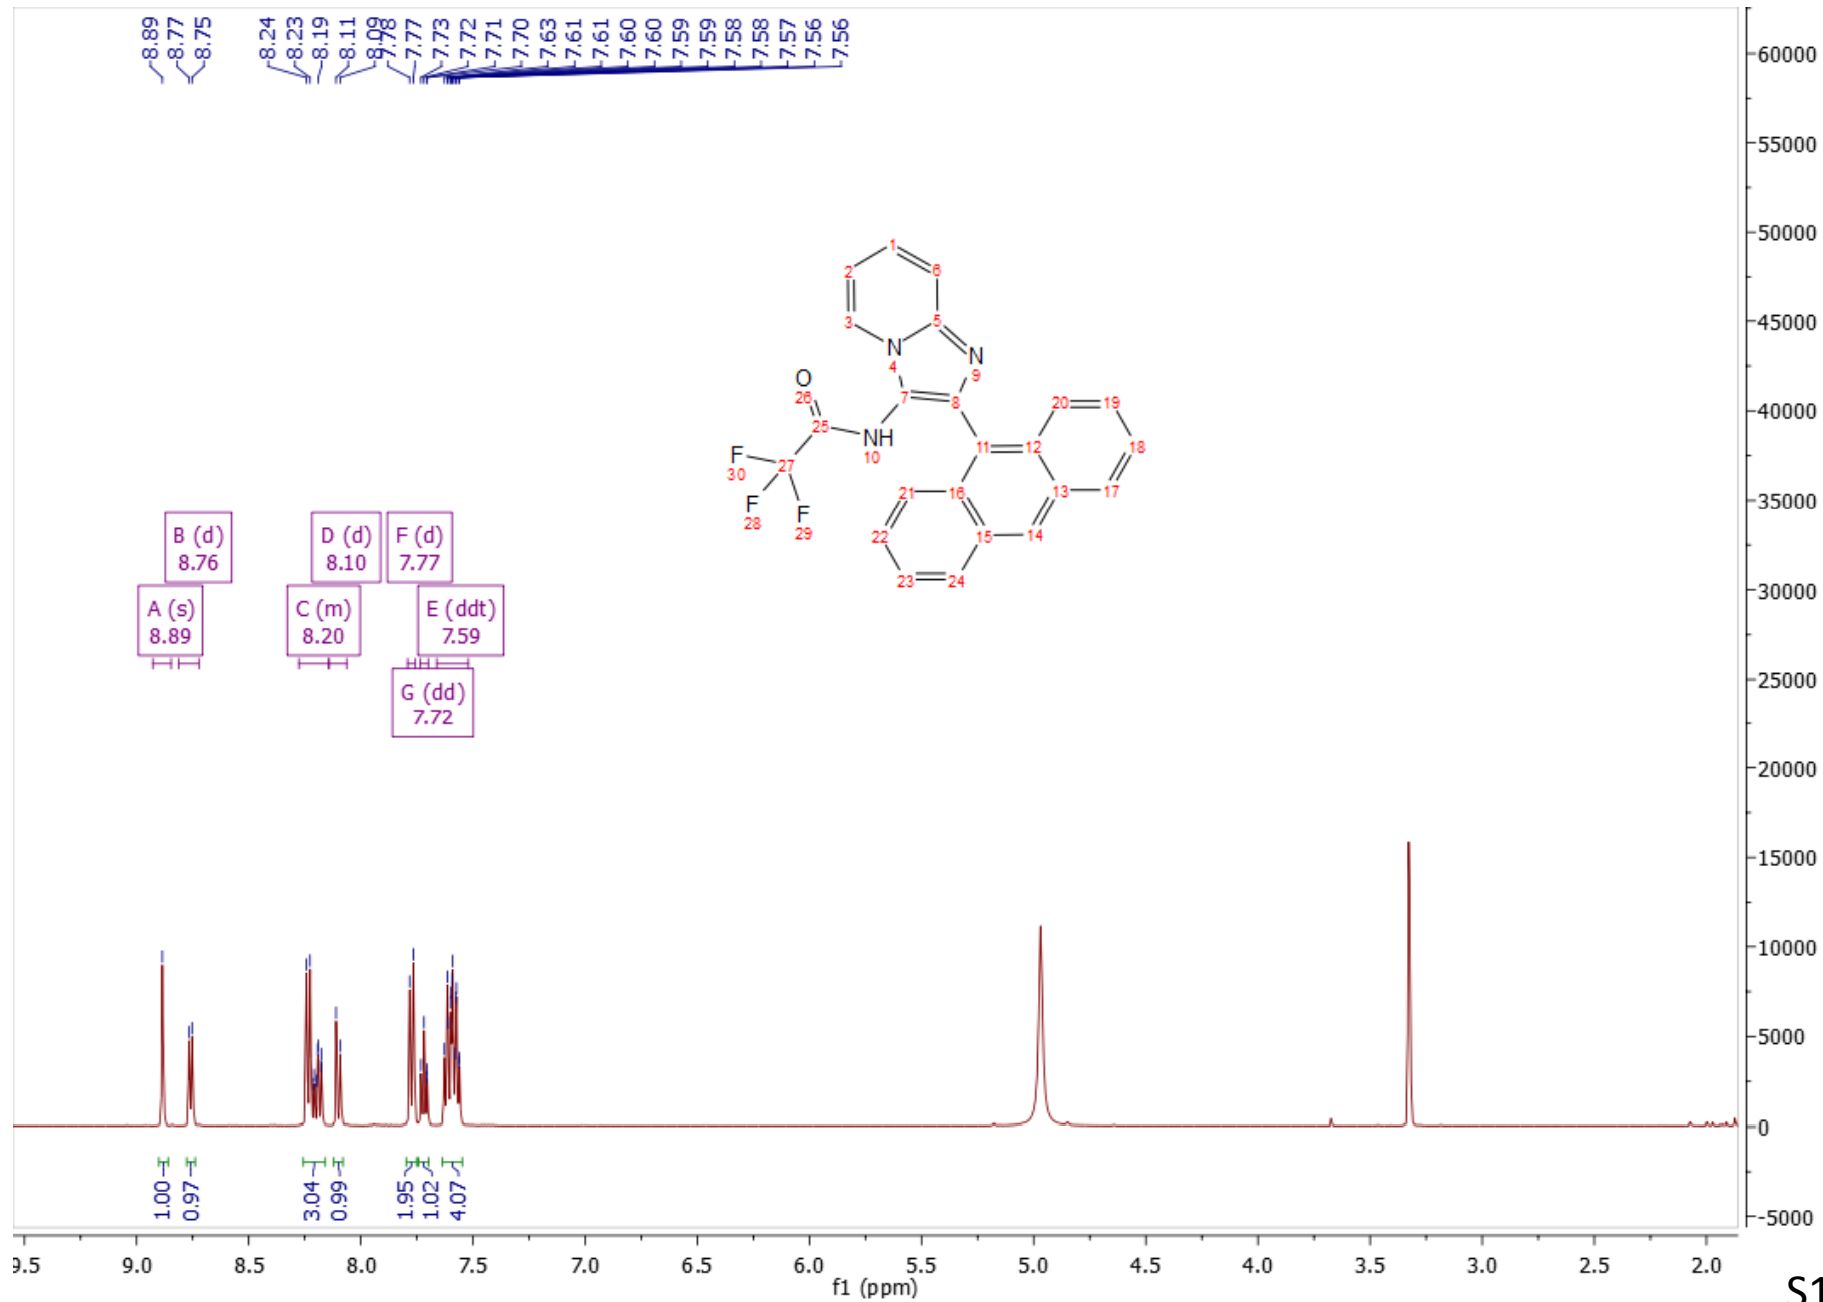

# 7c <sup>13</sup>C Spectrum

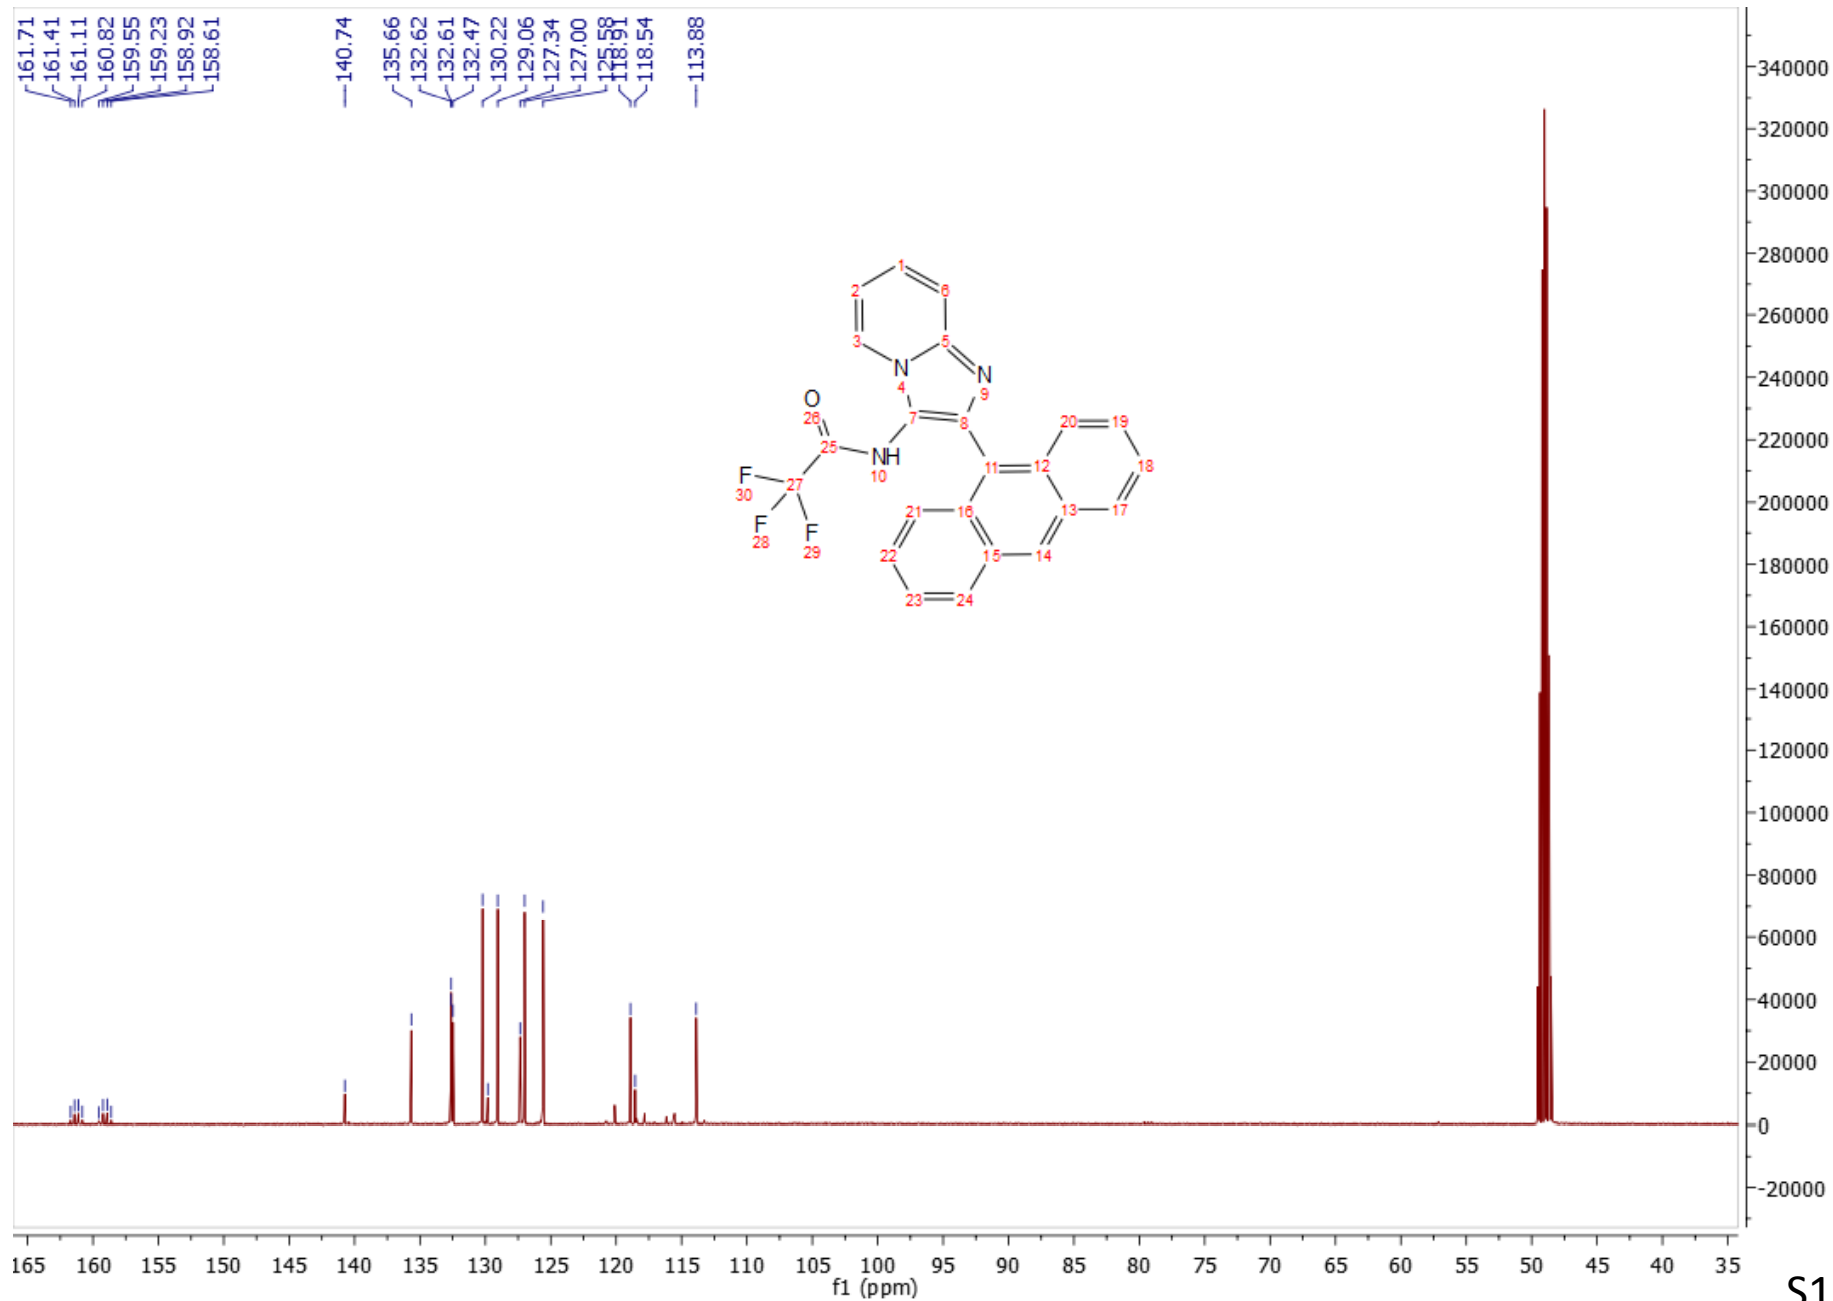



# 7c LC-MS

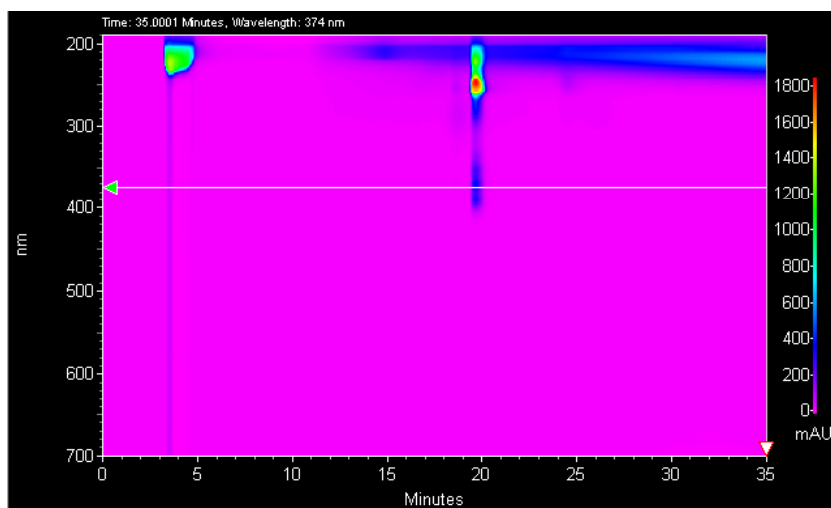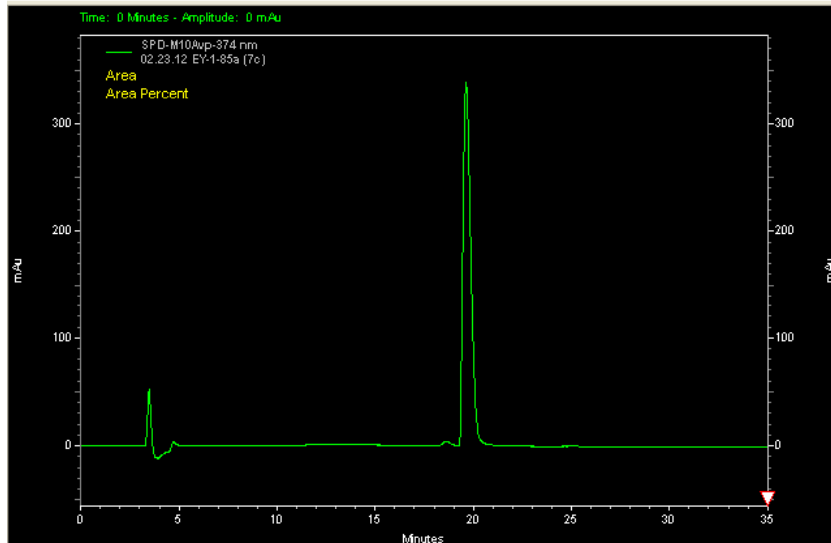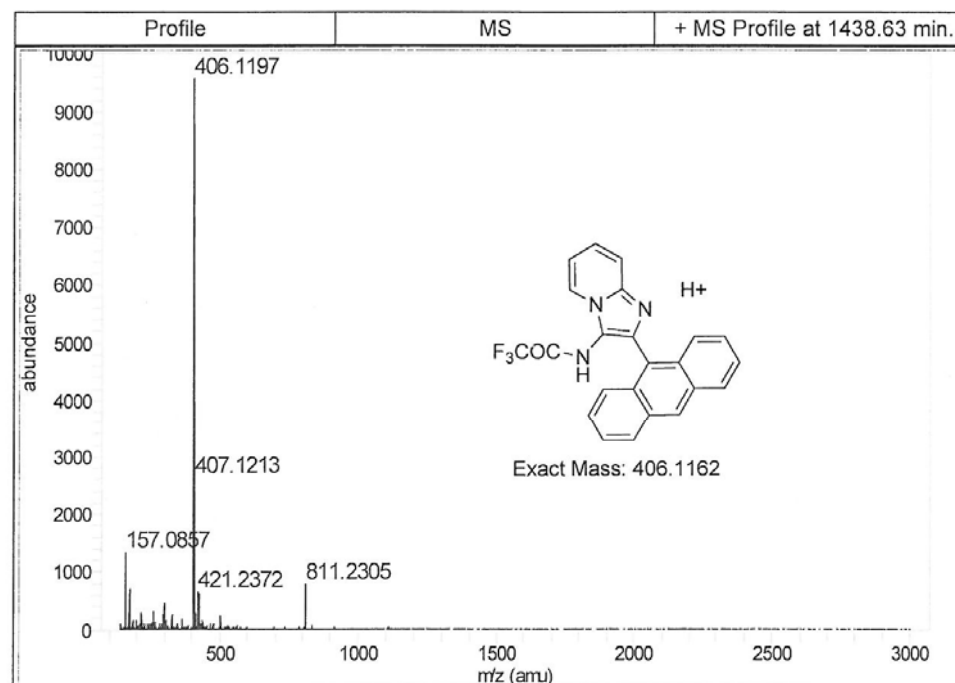

# 8a <sup>1</sup>H Spectrum

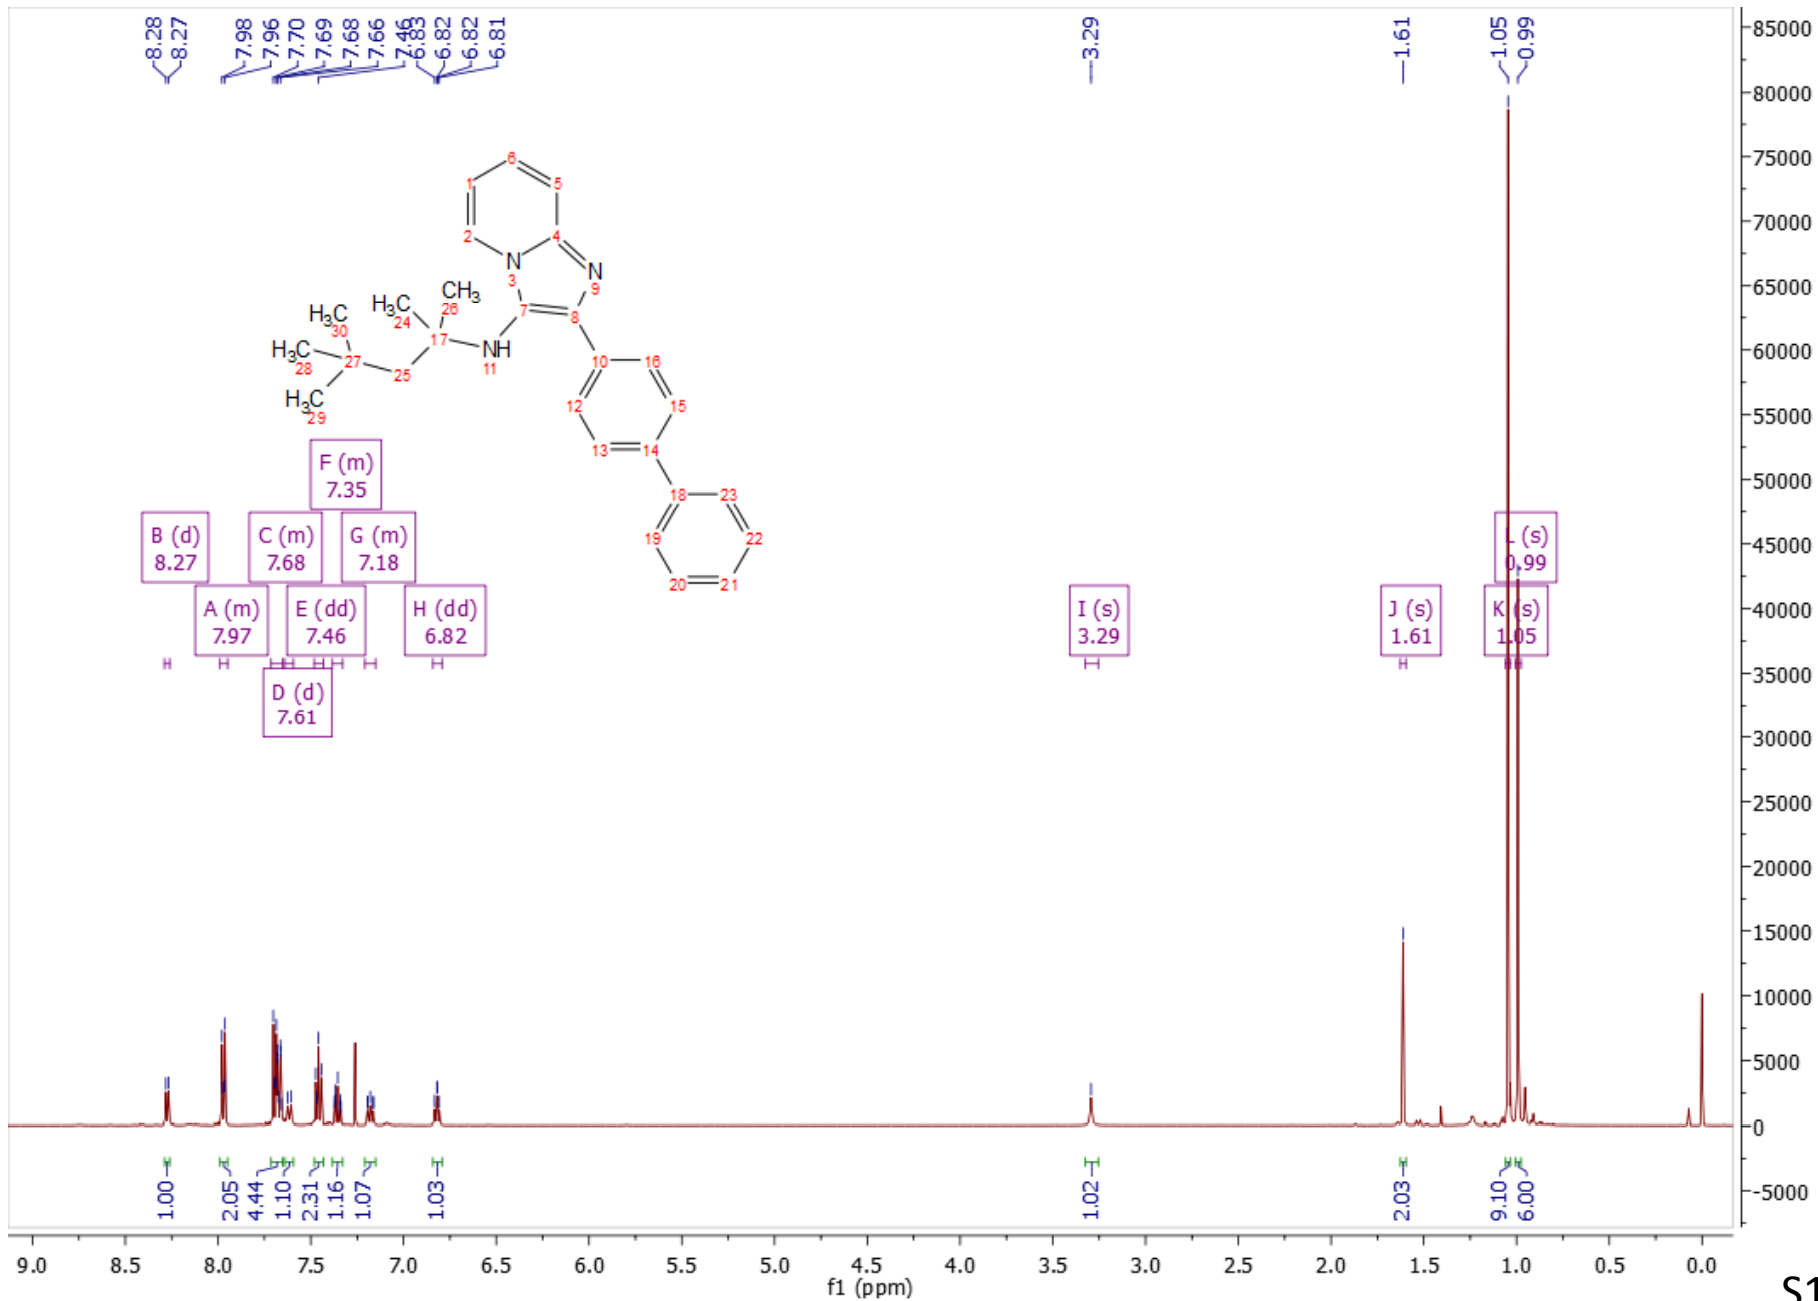

# 8a <sup>13</sup>C Spectrum

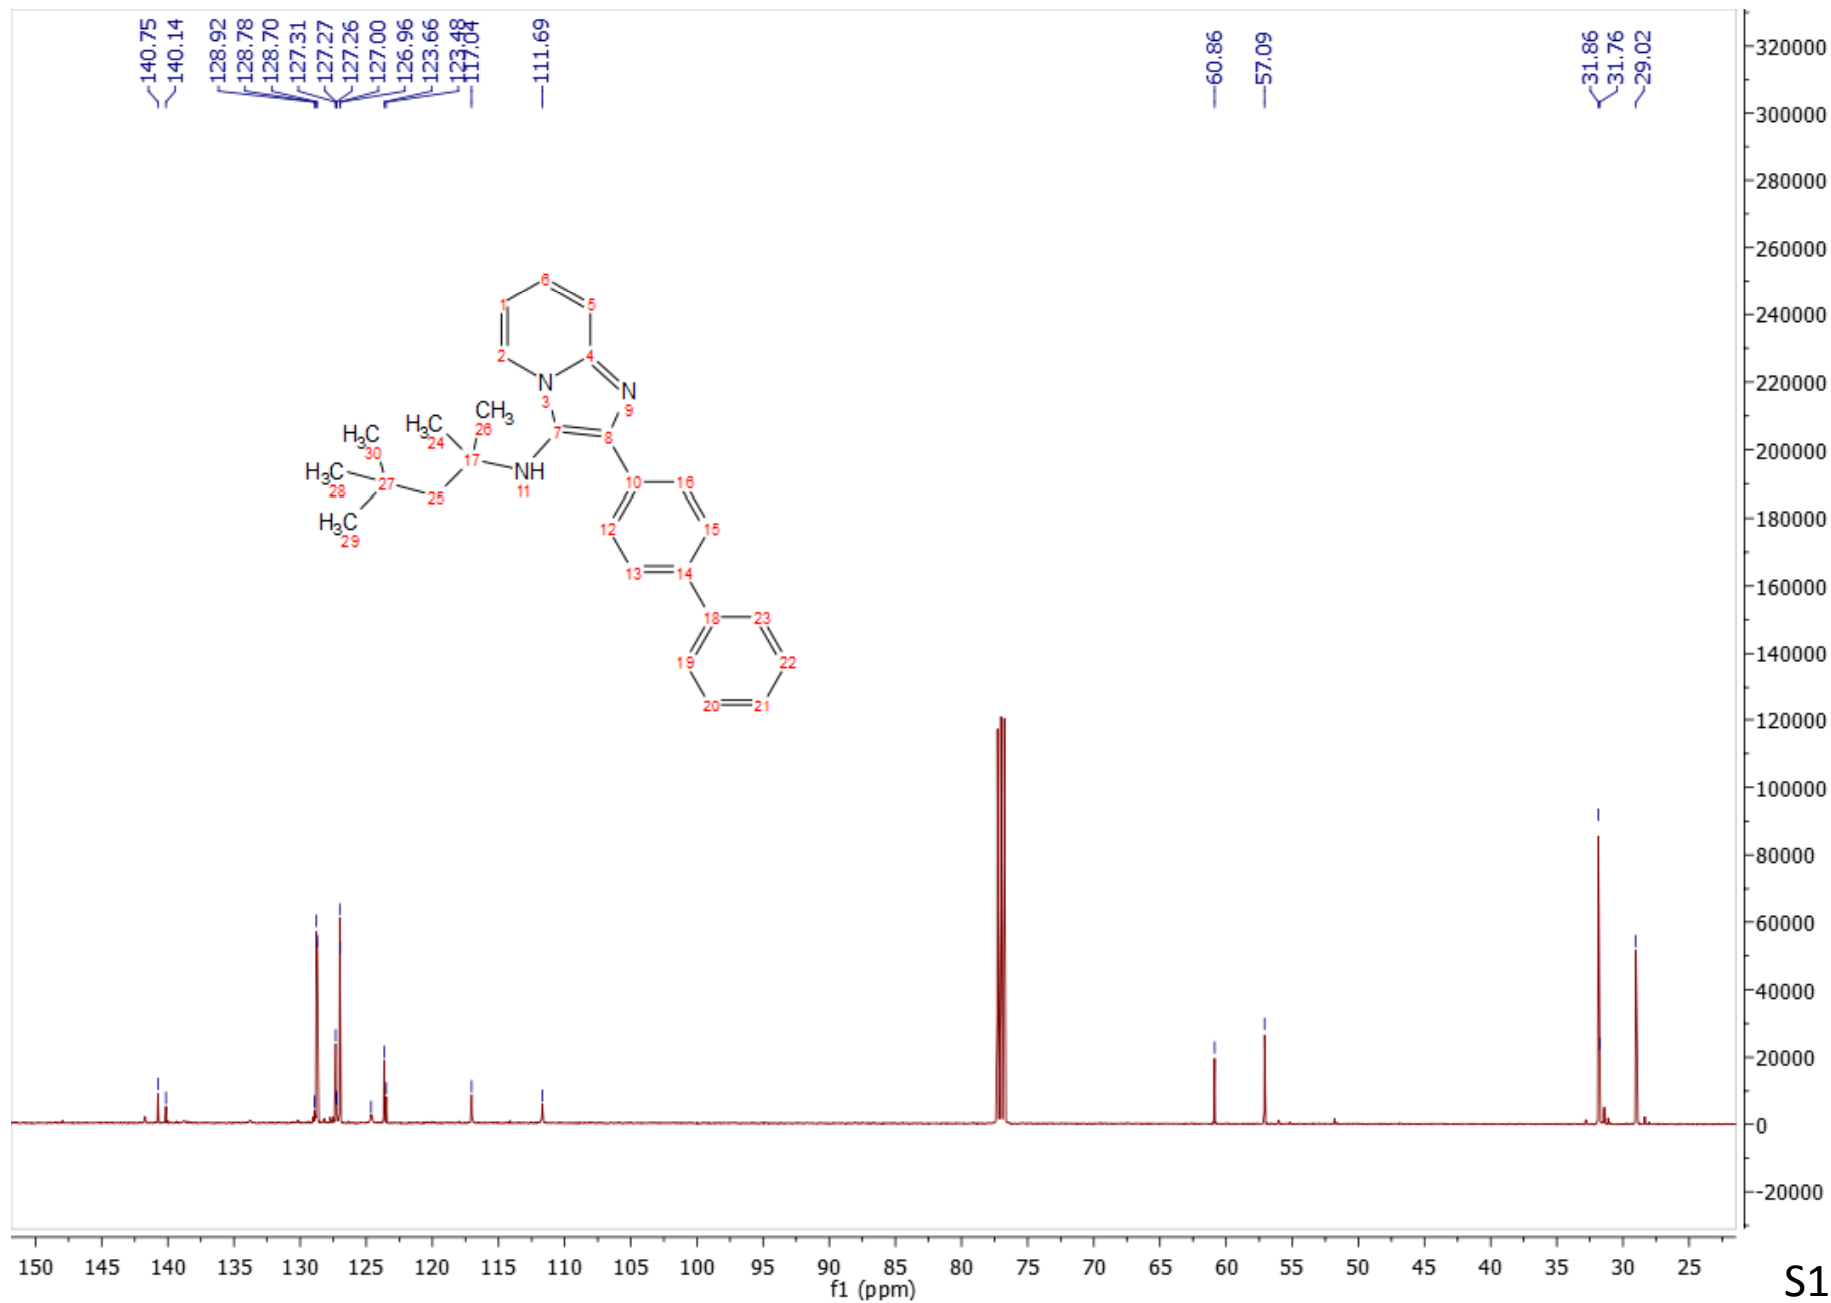

# 8a LC-MS

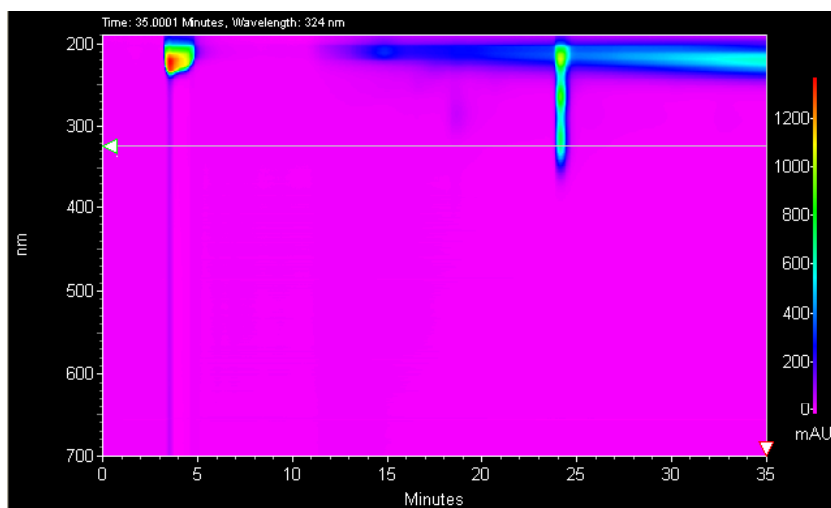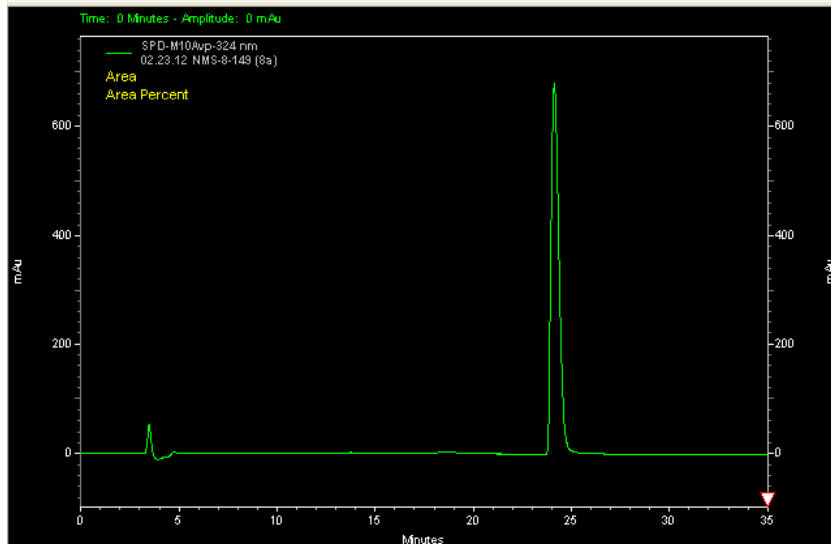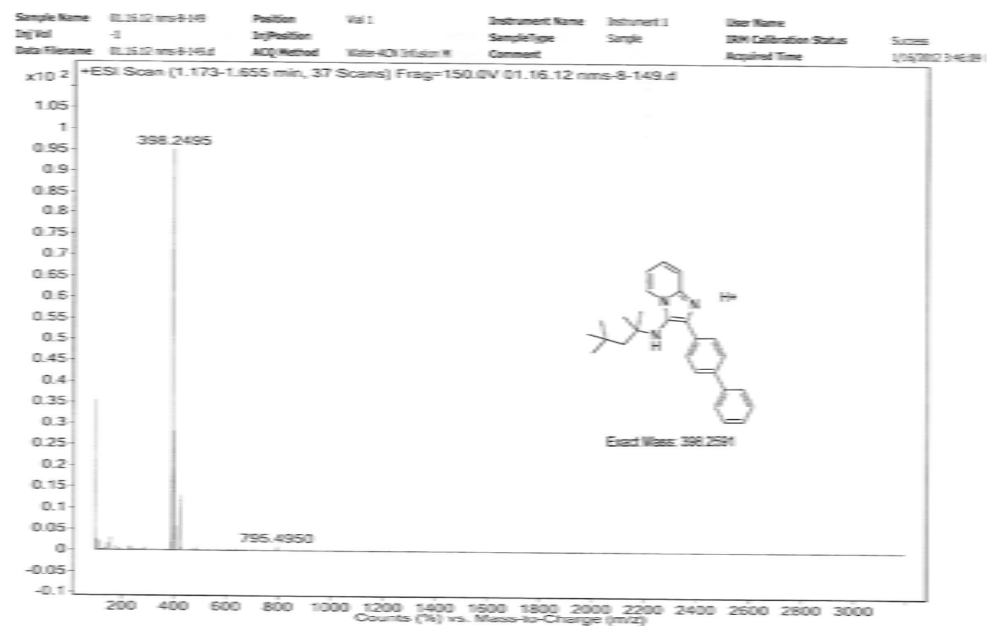

# 8b <sup>1</sup>H Spectrum

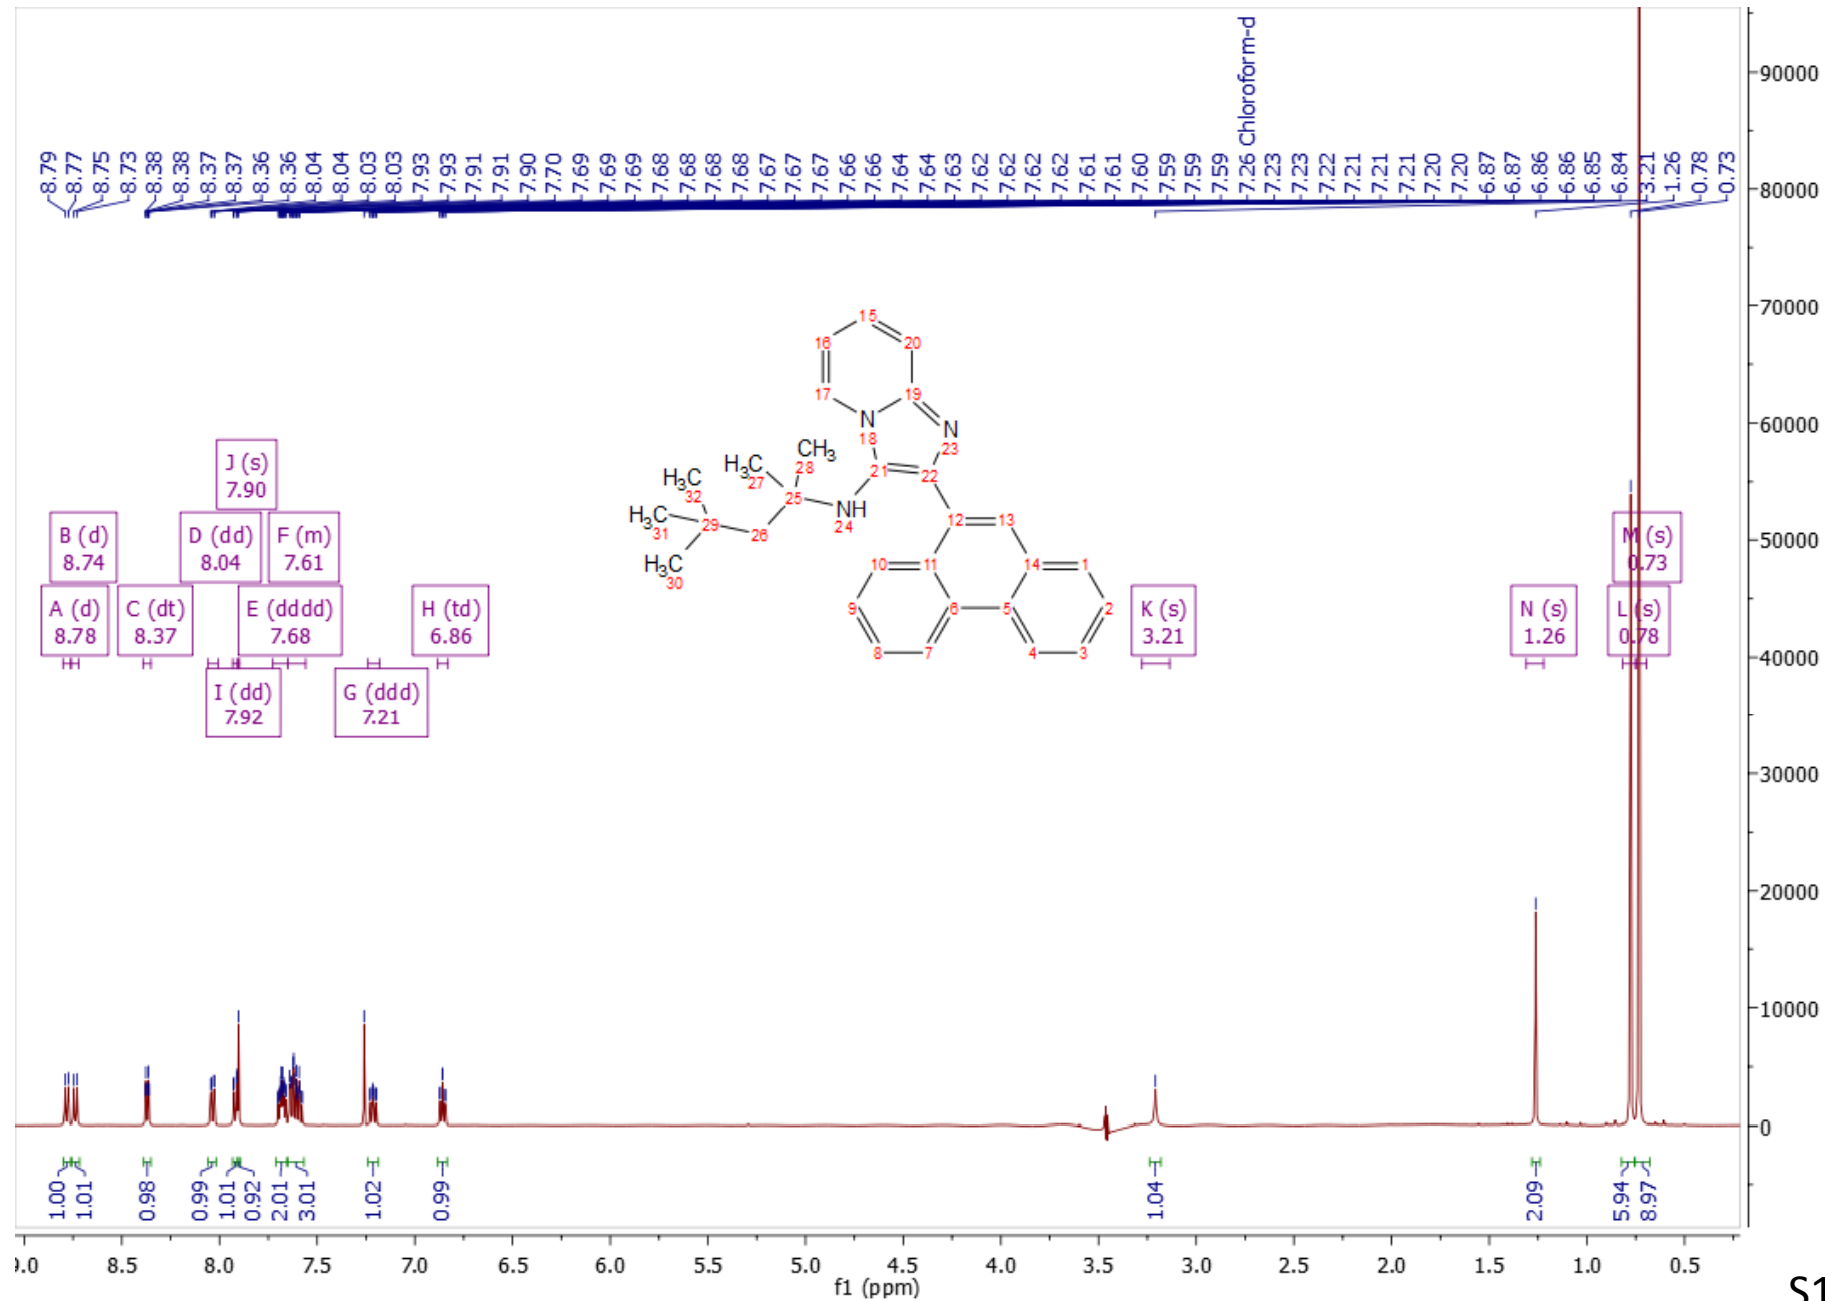

# 8b <sup>13</sup>C Spectrum

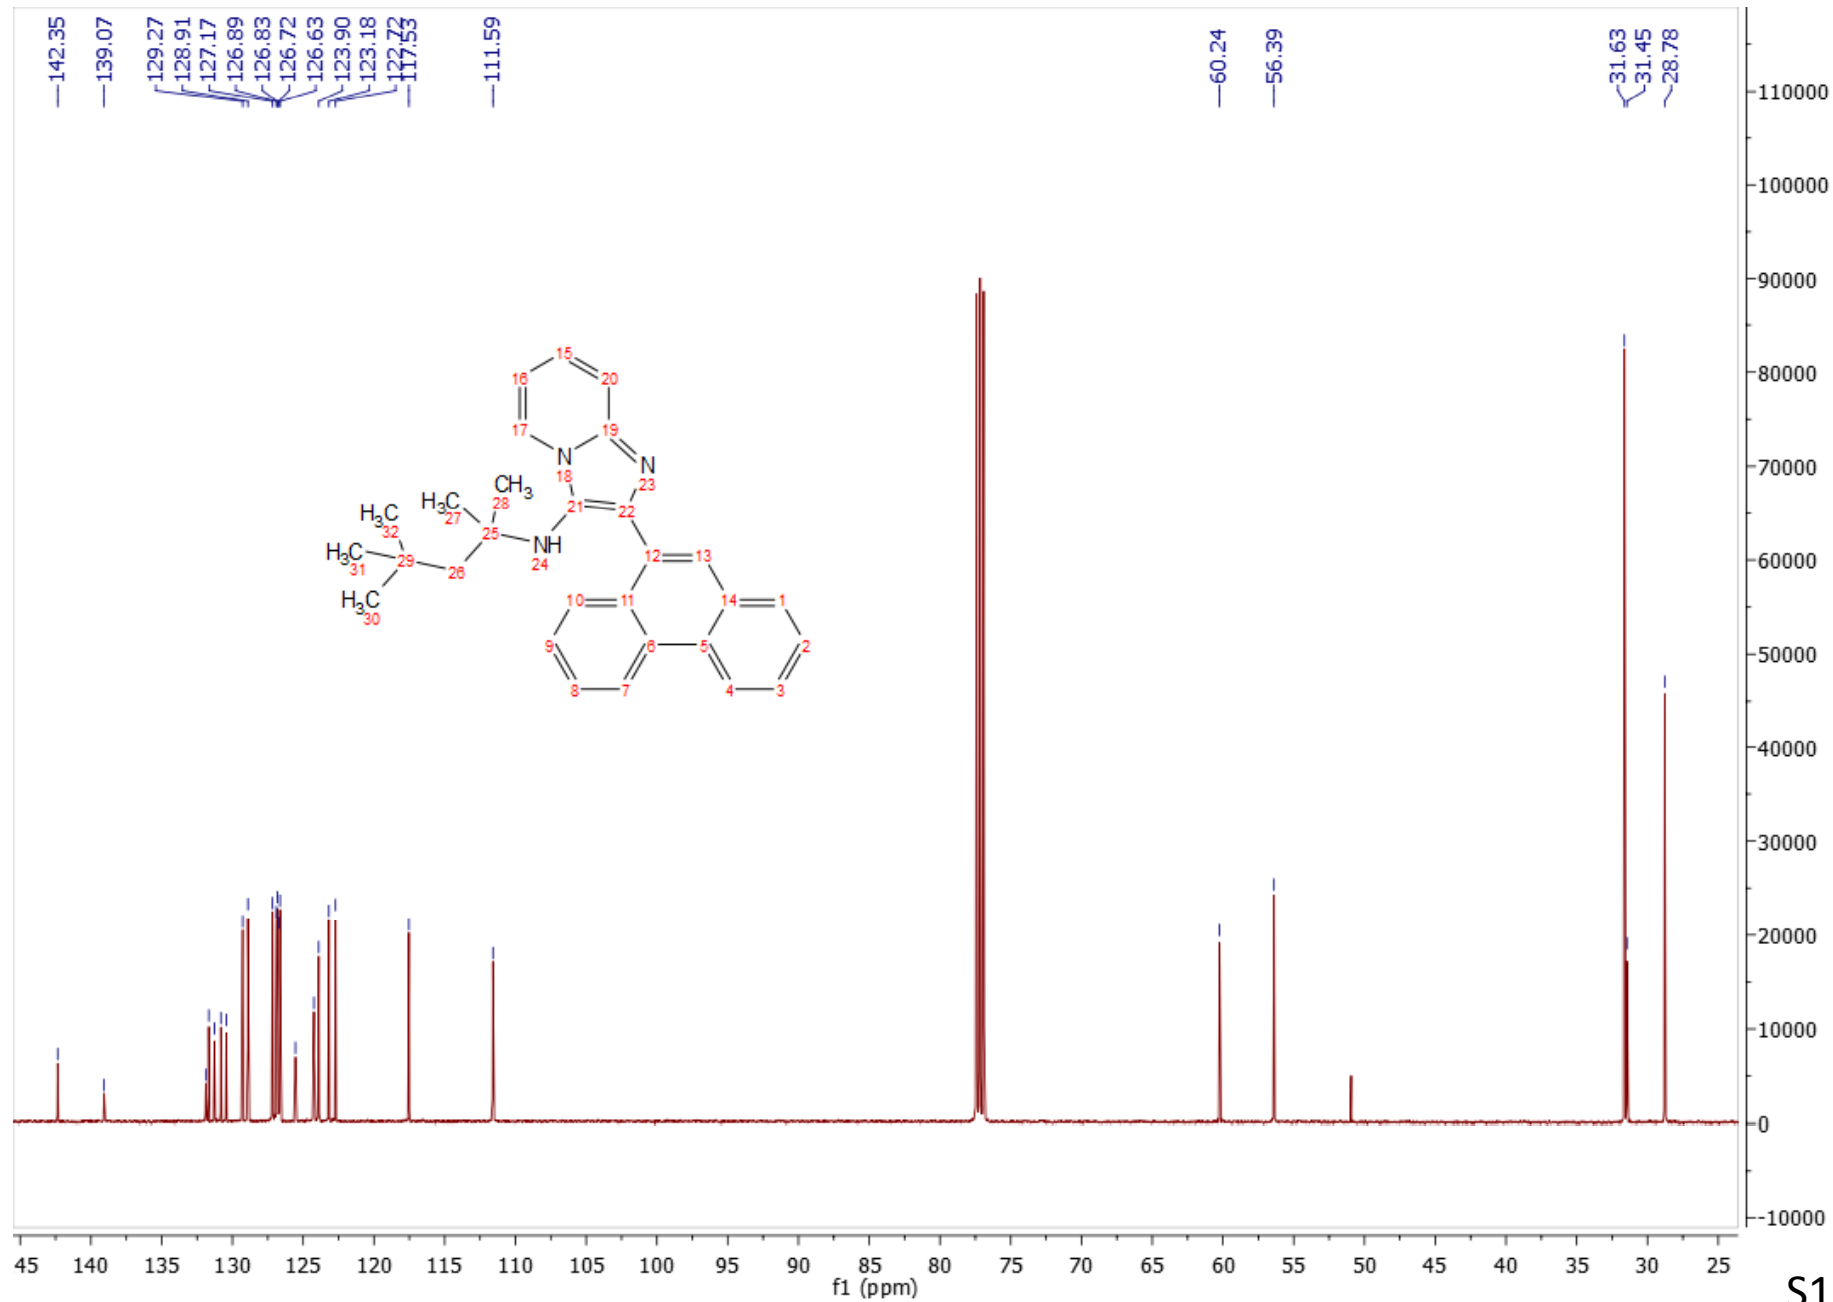

# 8b LC-MS

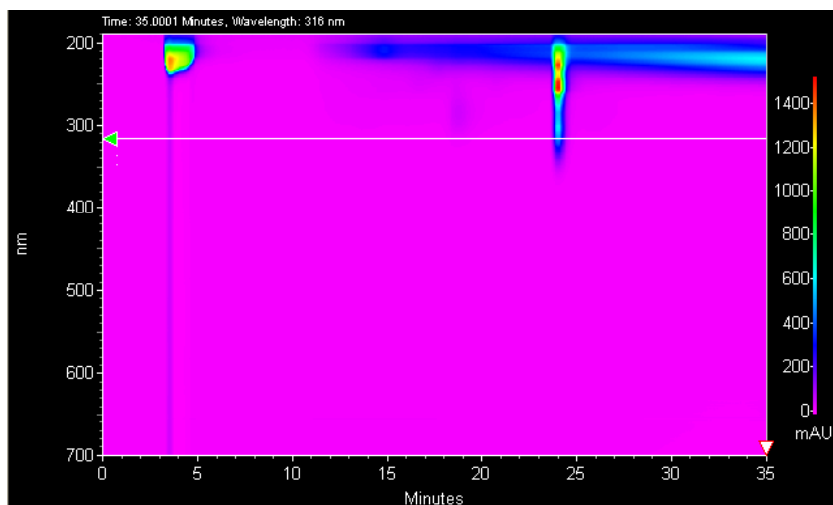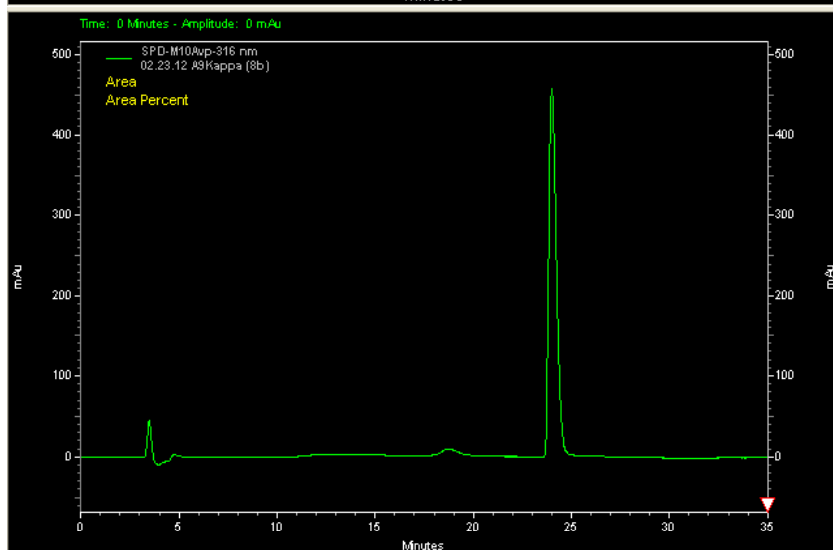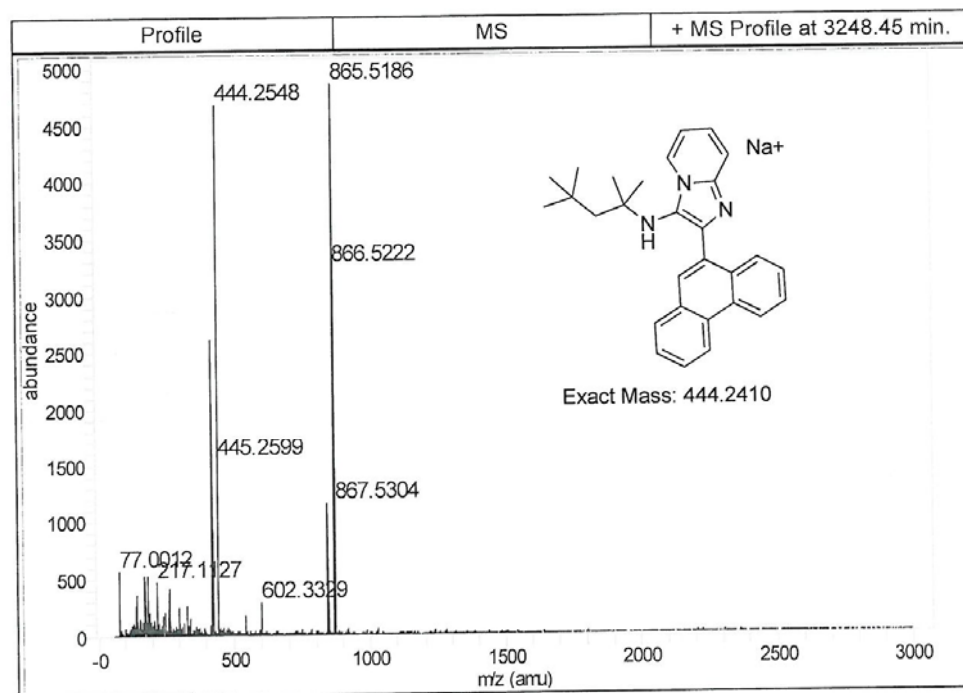

# 8c <sup>1</sup>H Spectrum

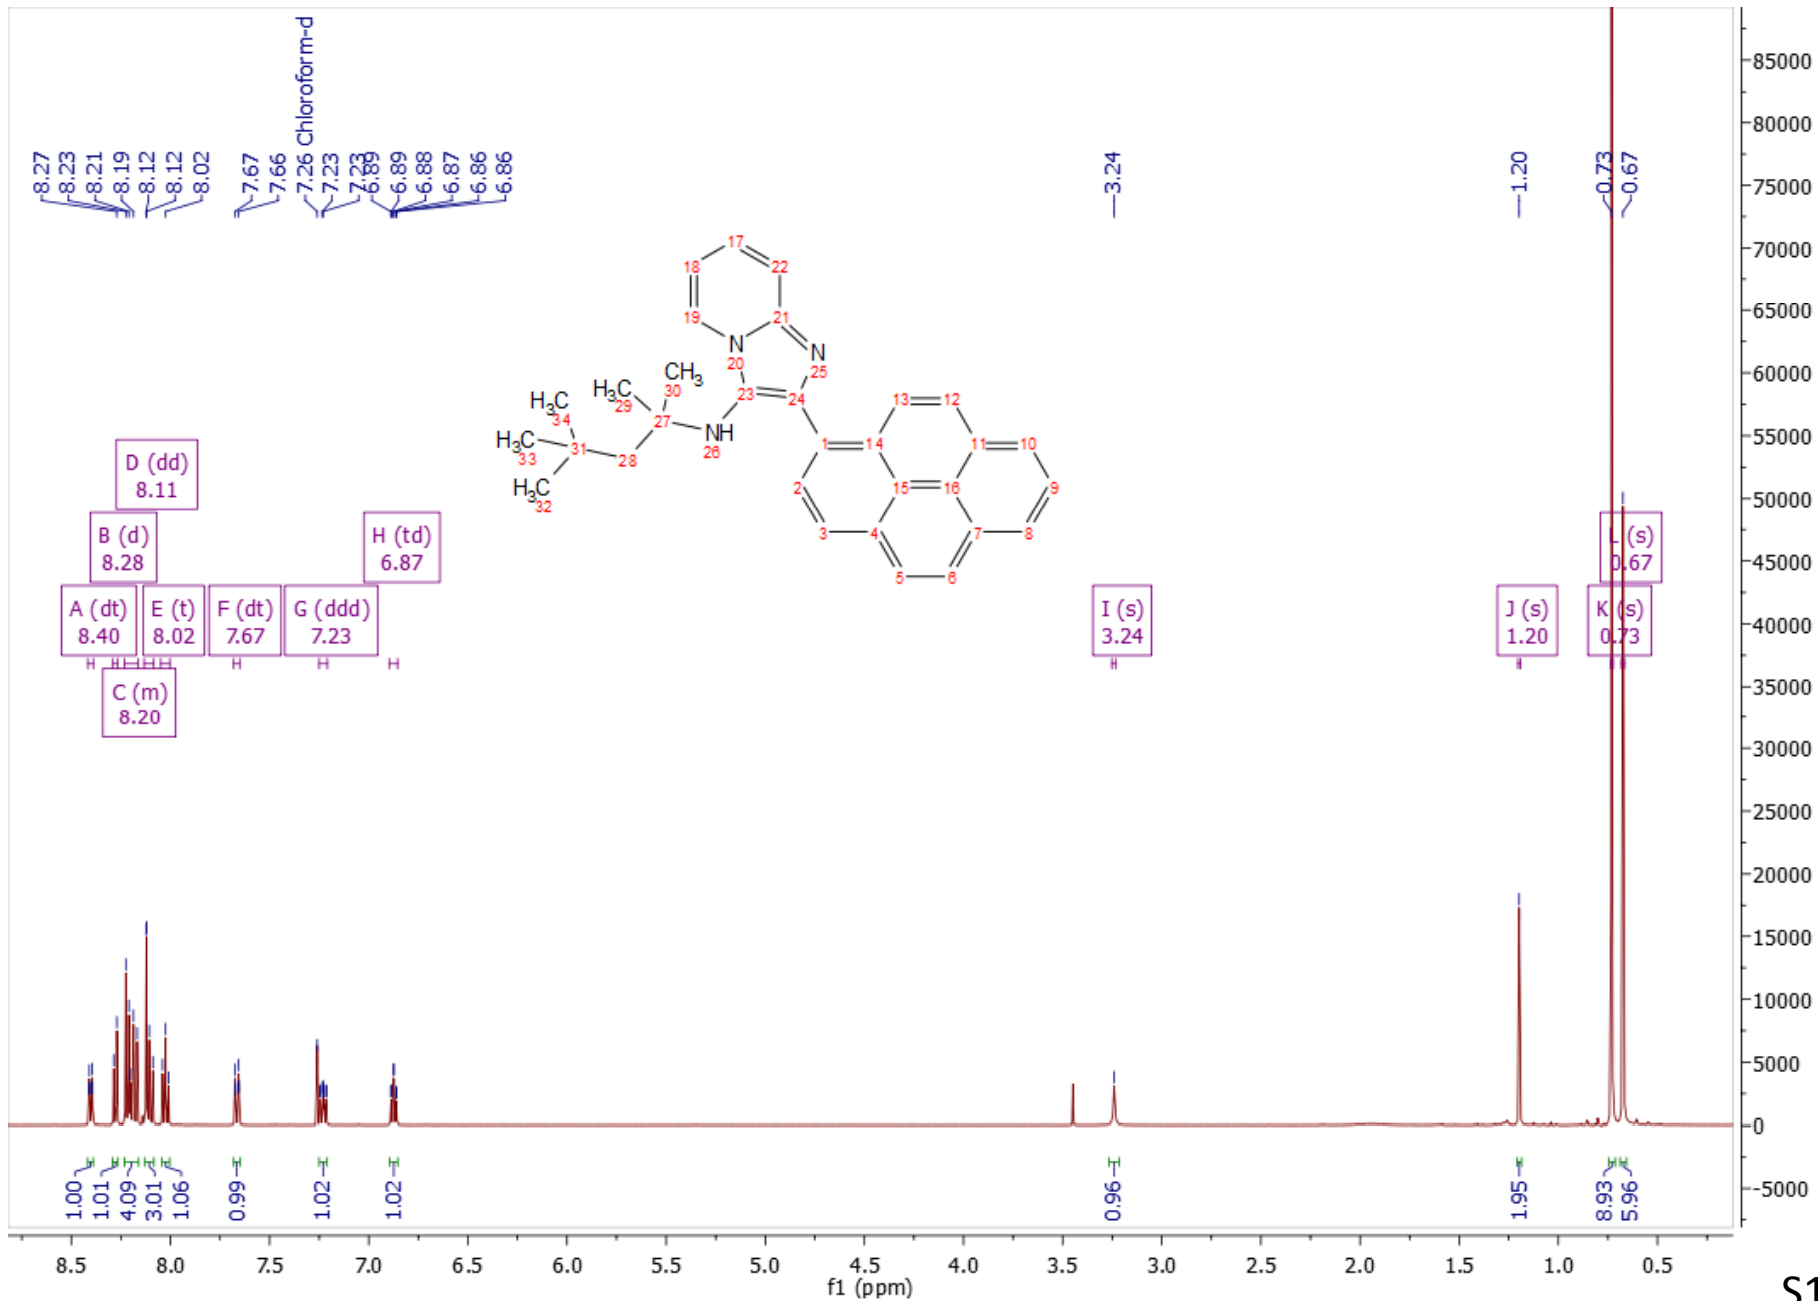



# 8c <sup>13</sup>C Spectrum

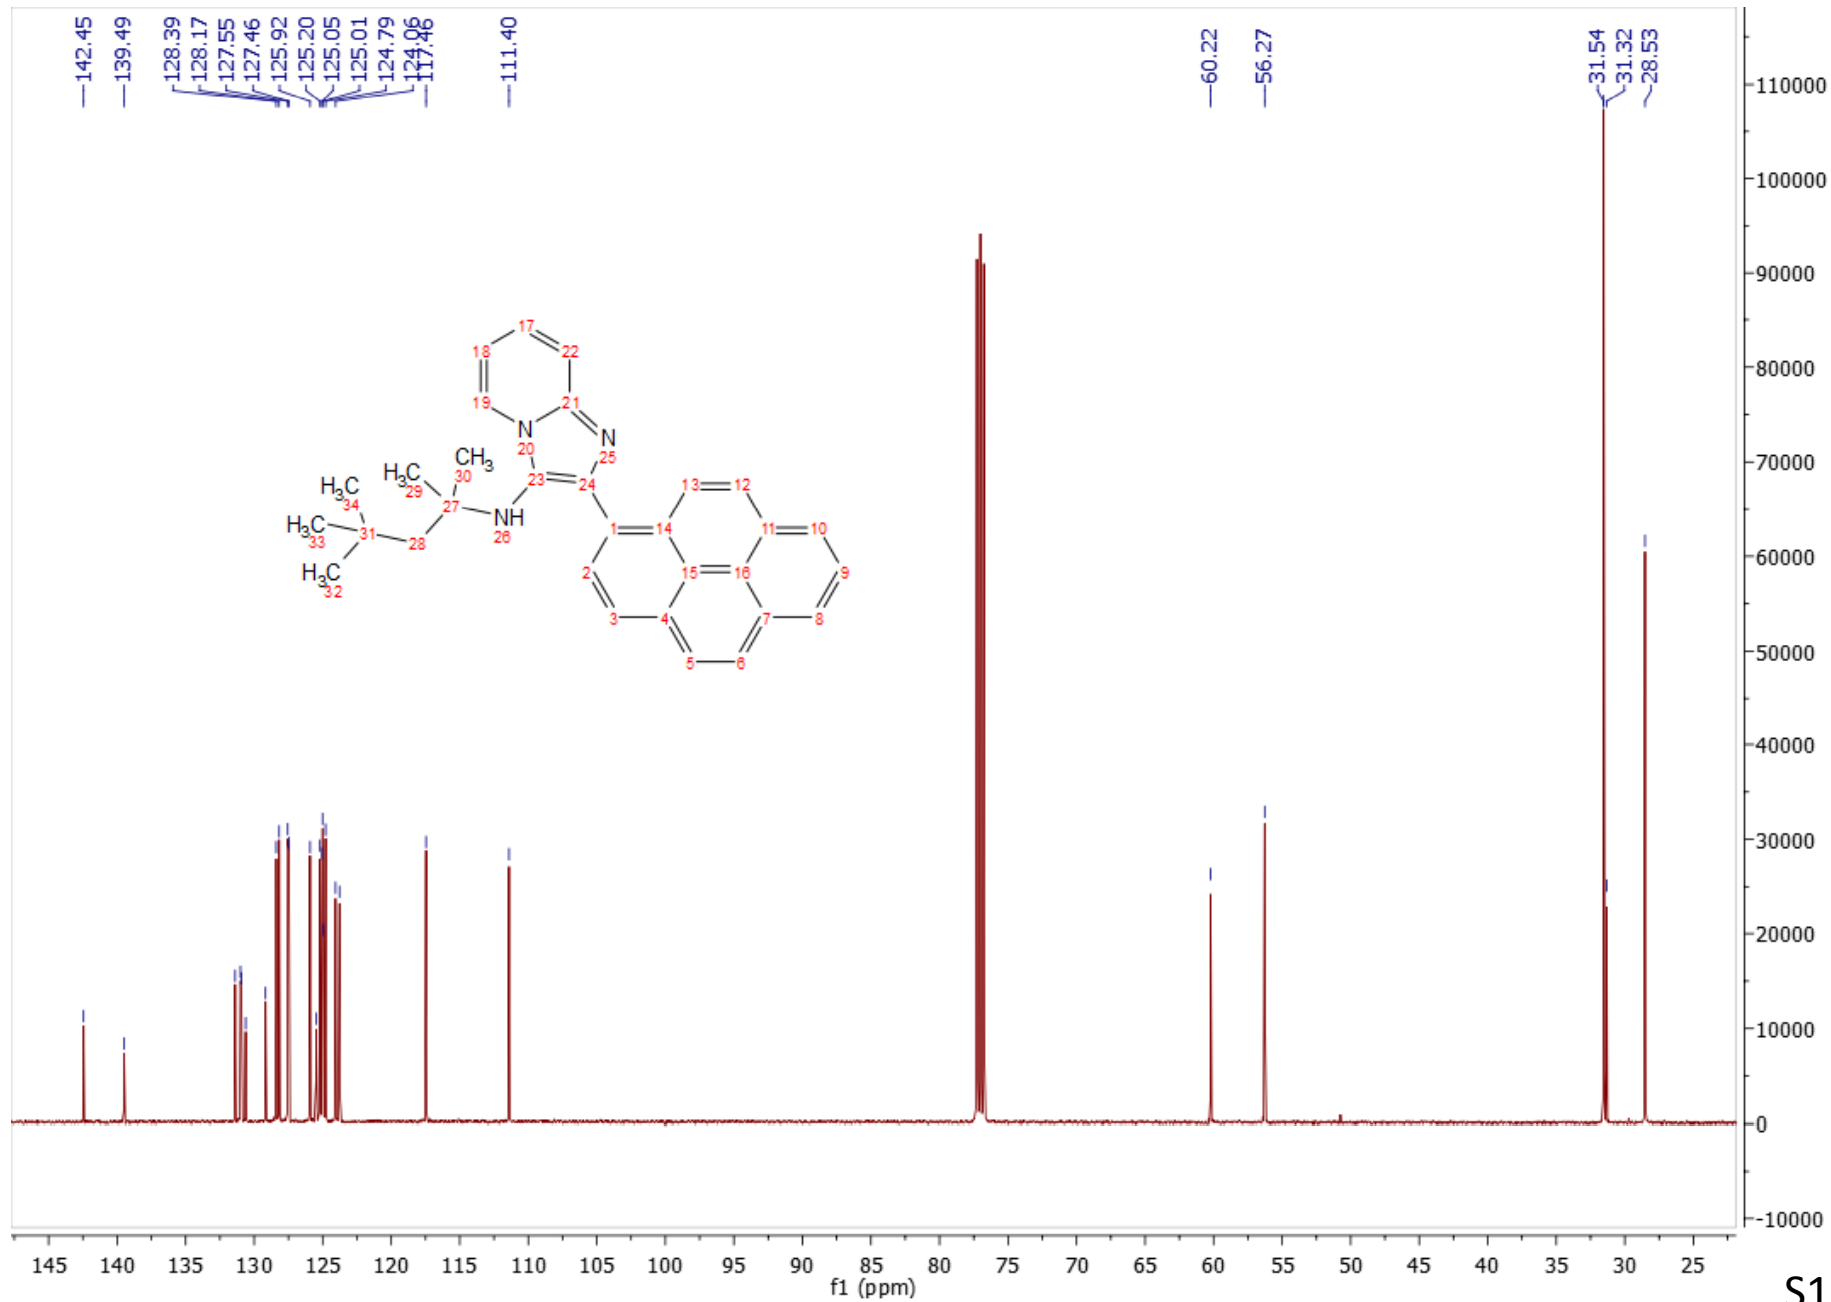

# 8c LC-MS

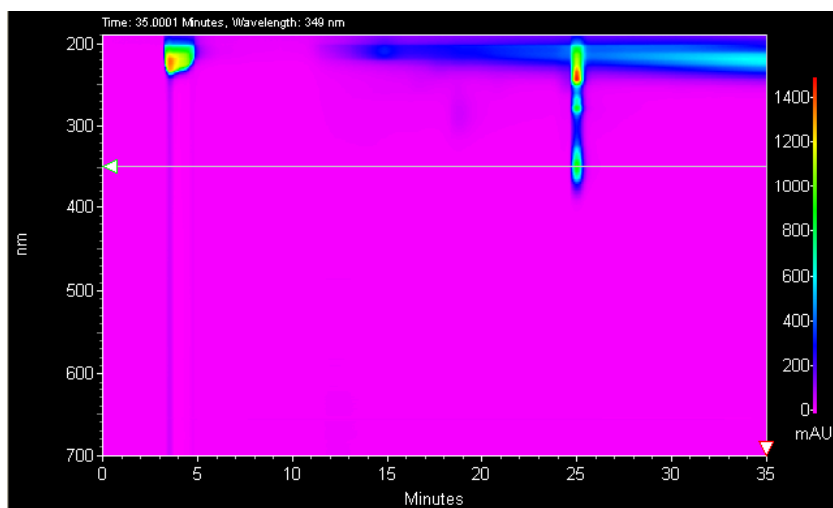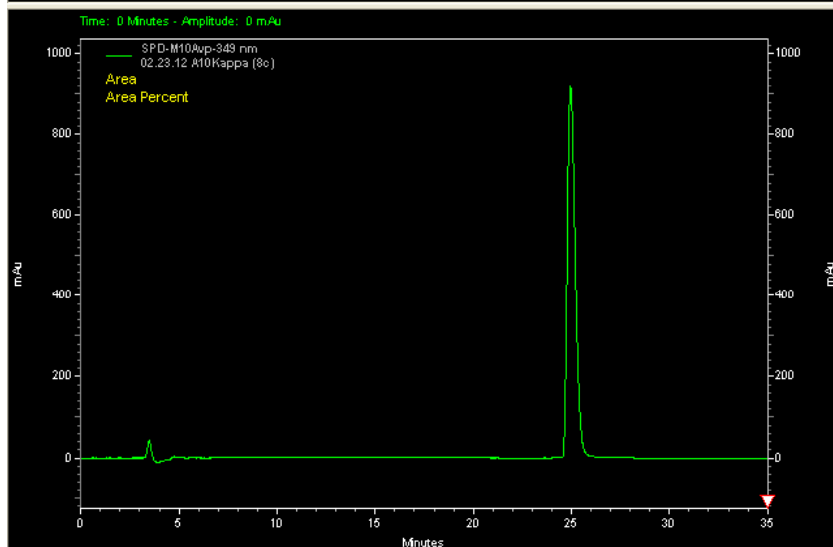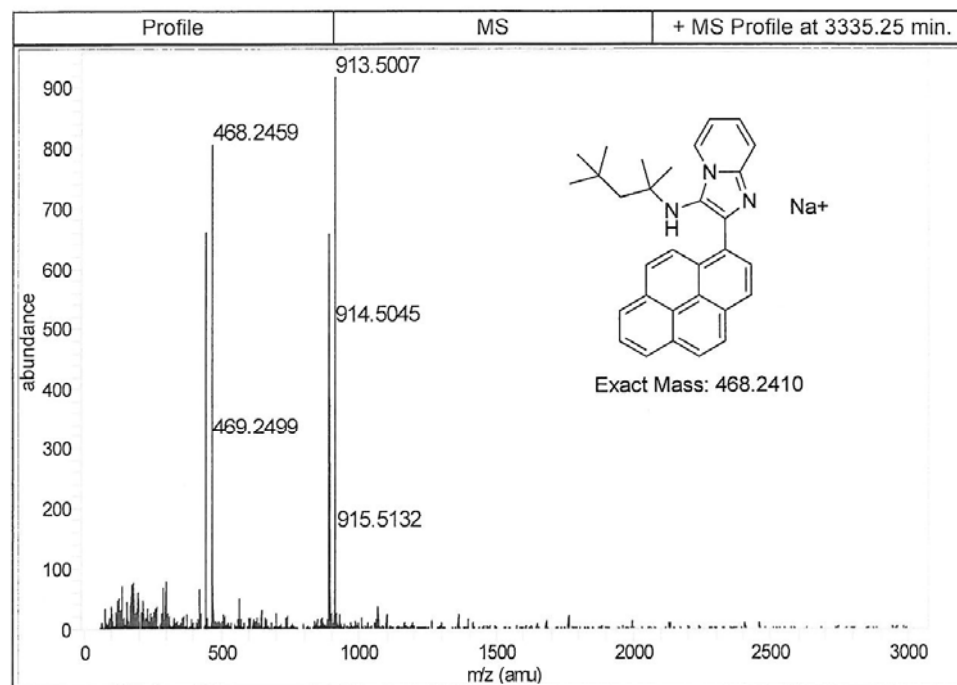

# 9 <sup>1</sup>H Spectrum

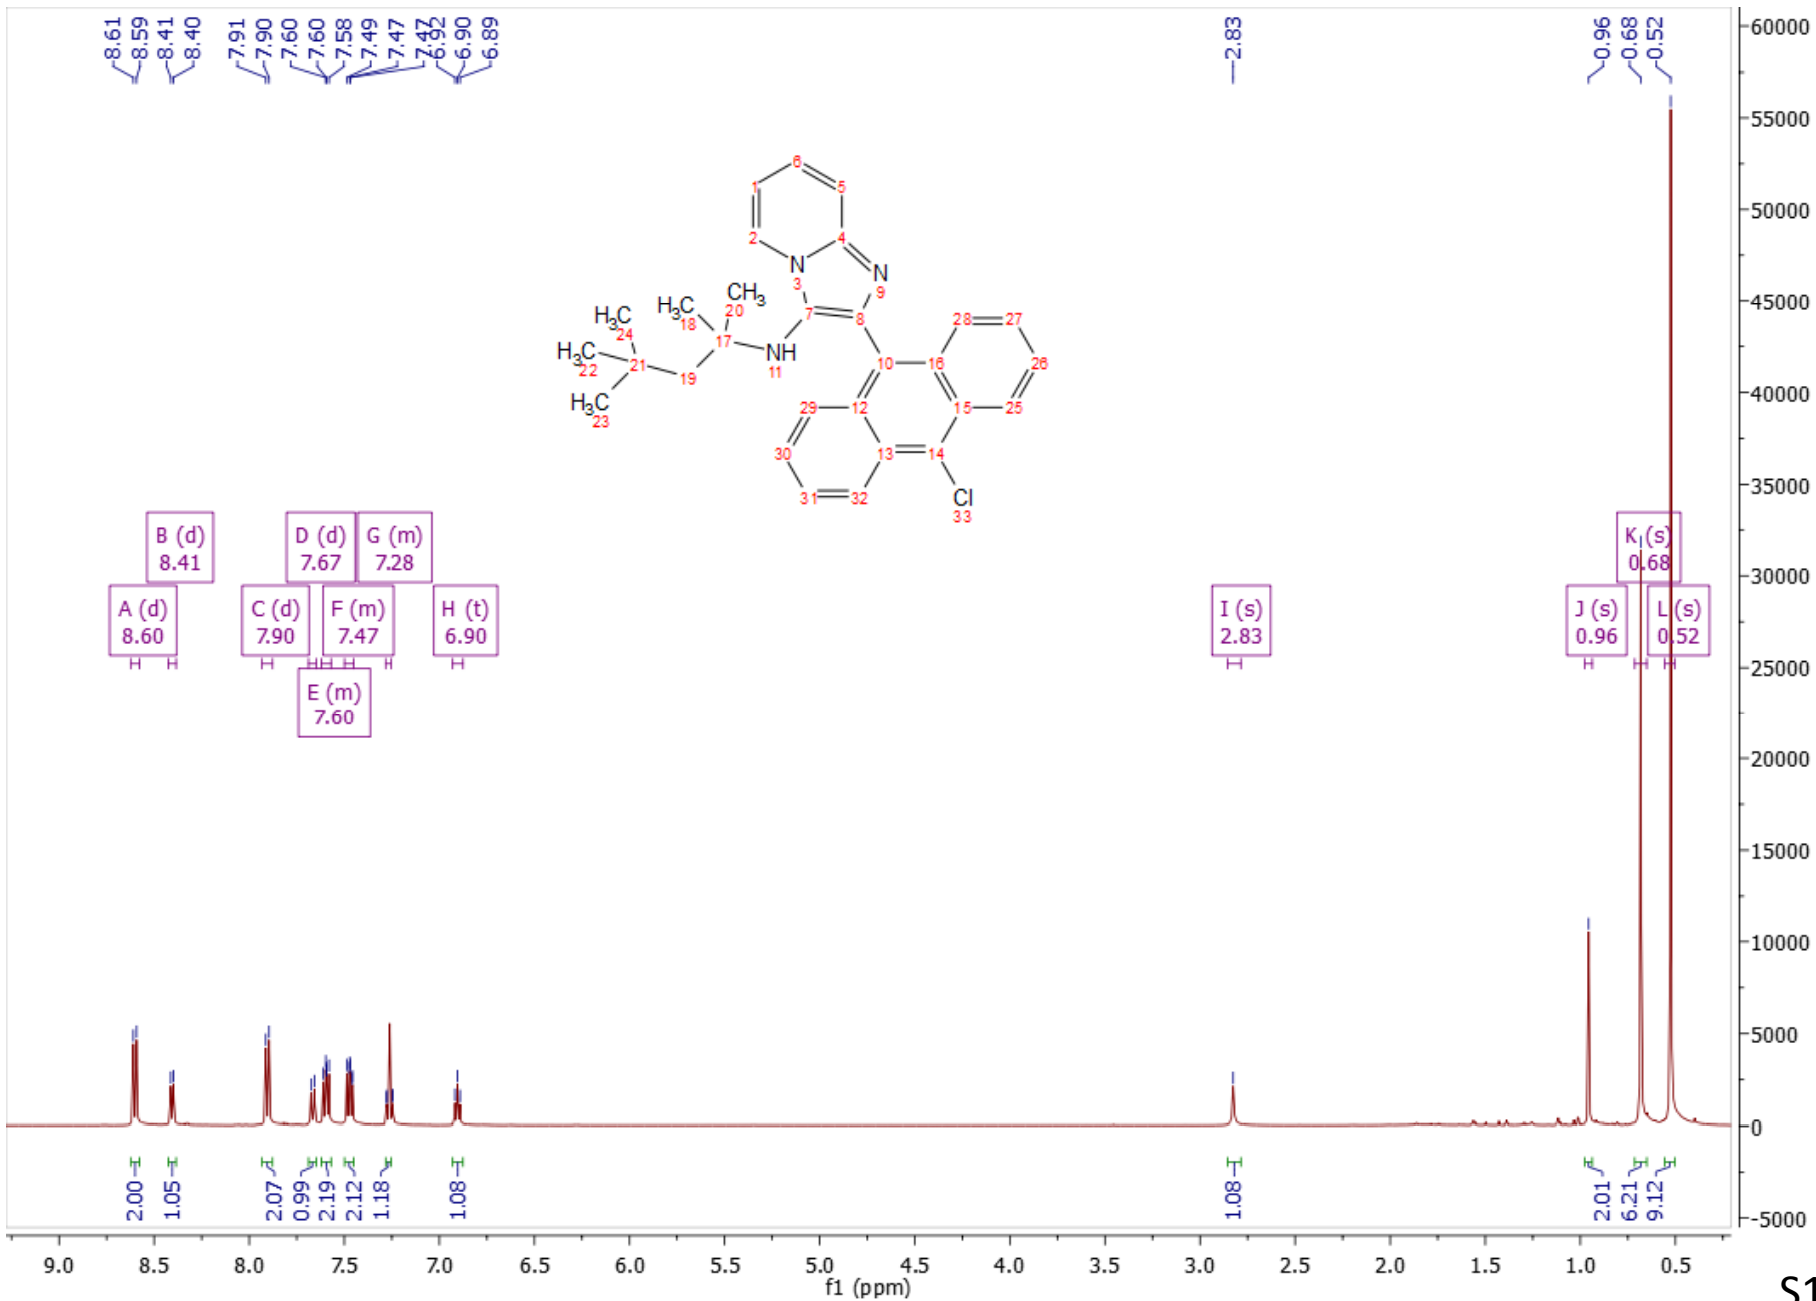

# 9 <sup>13</sup>C Spectrum

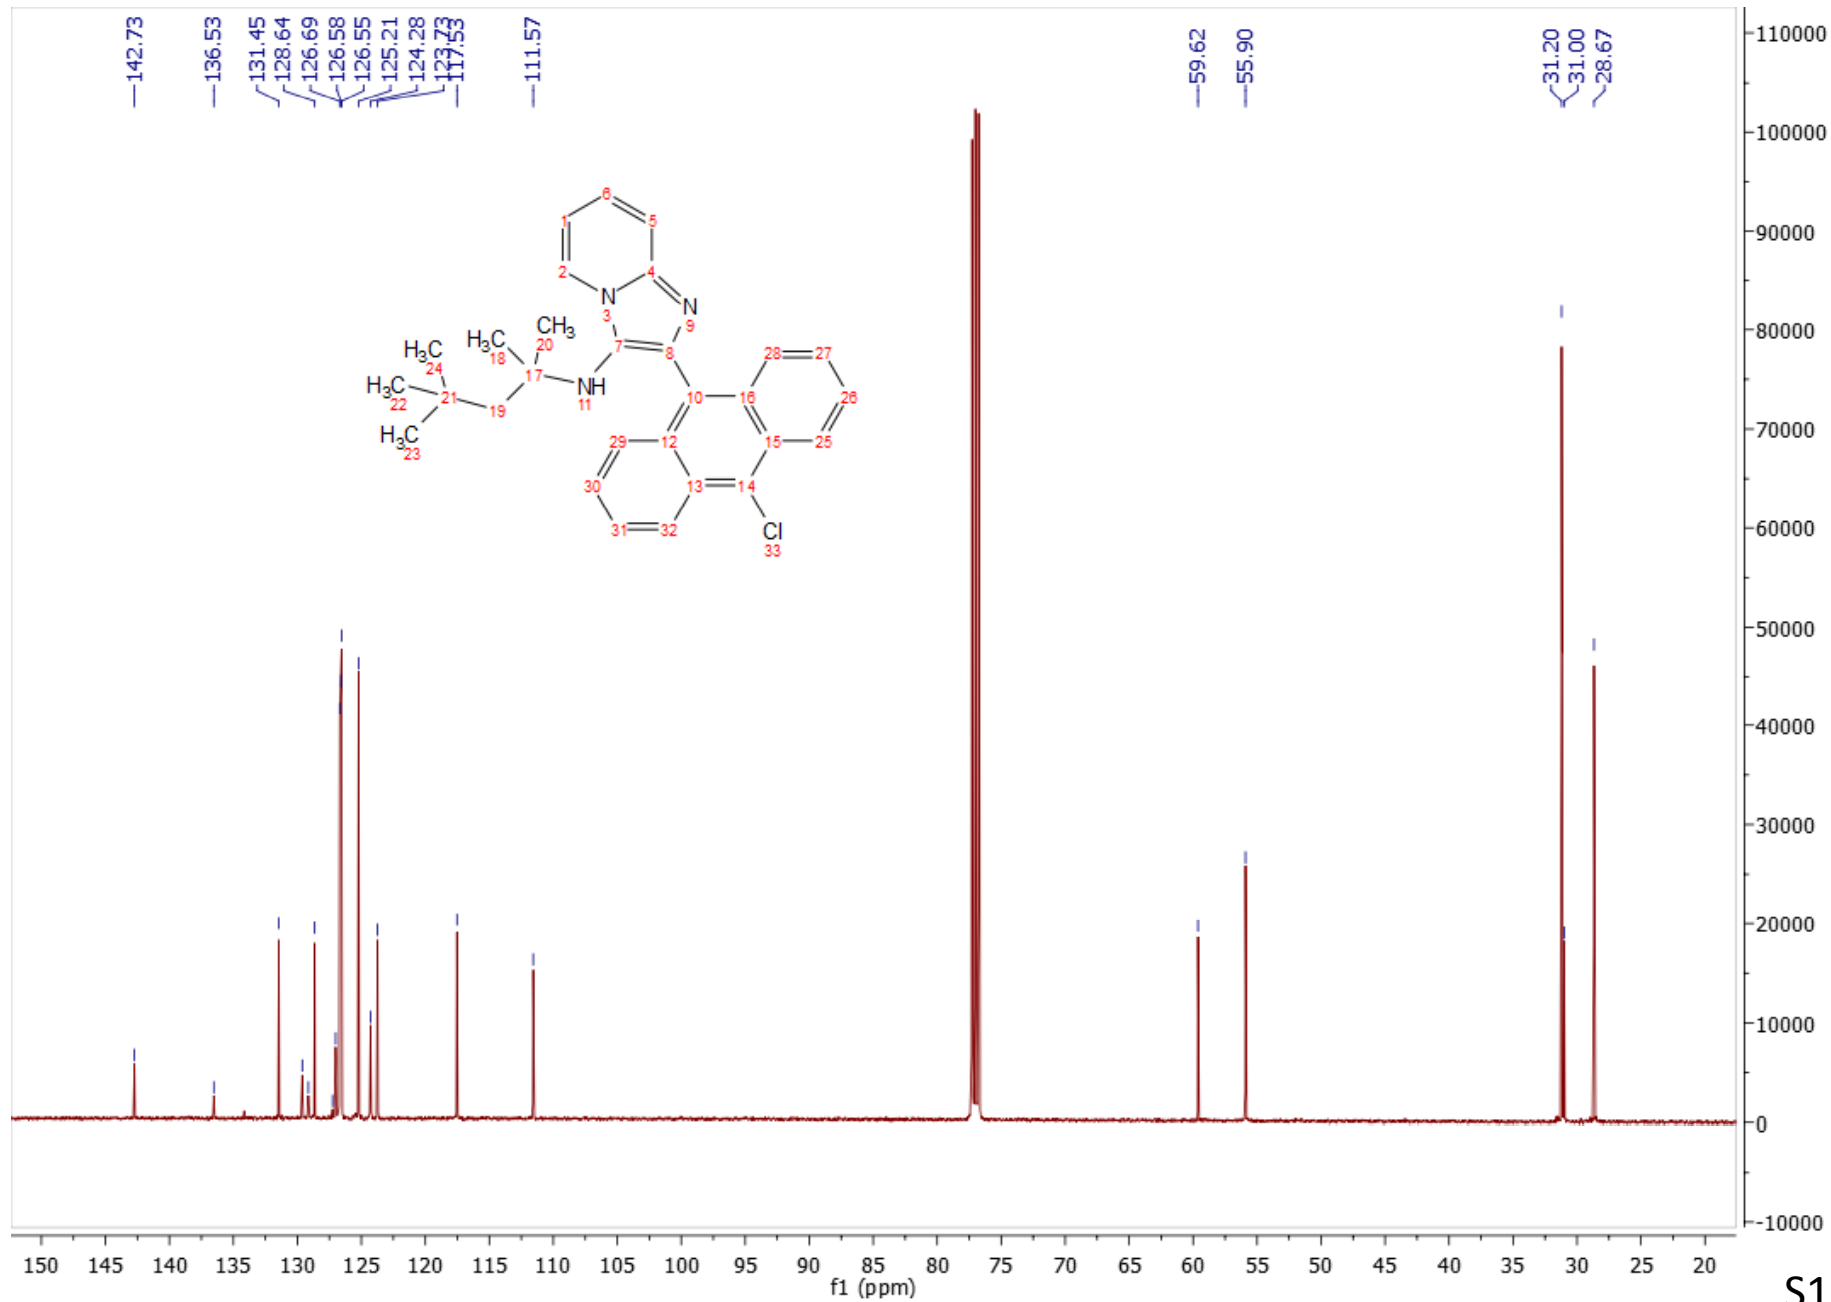

# 9 LC-MS

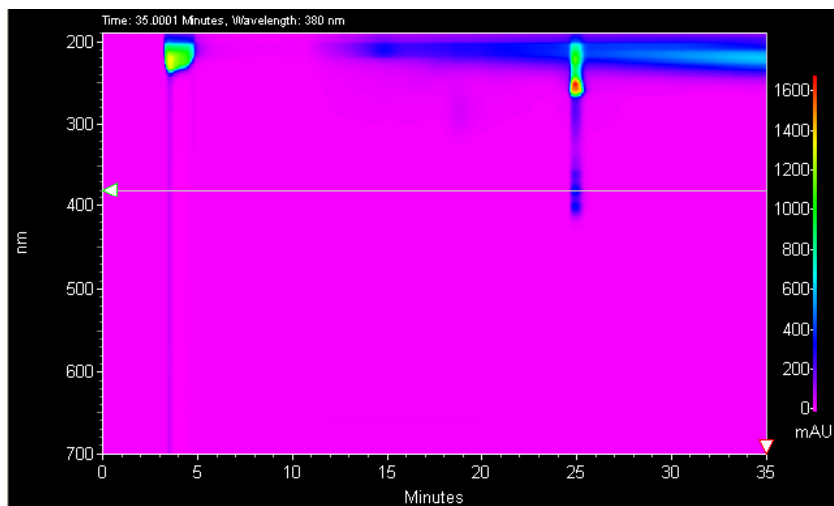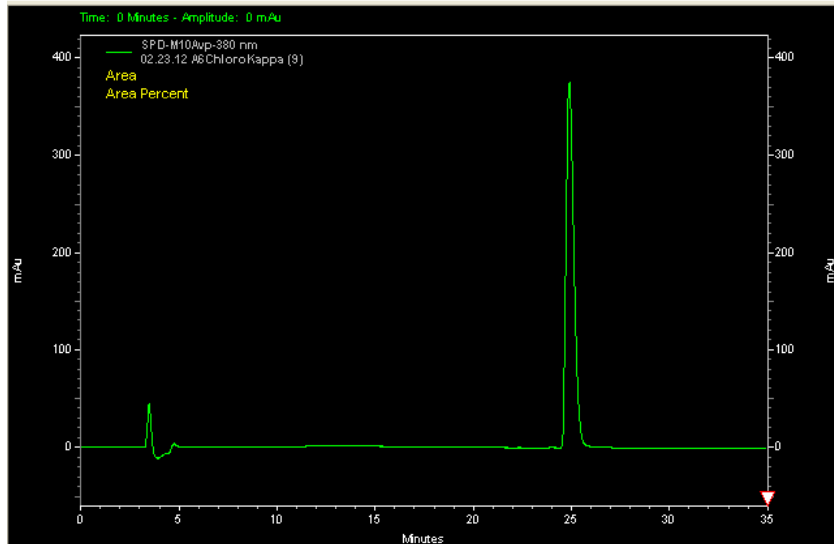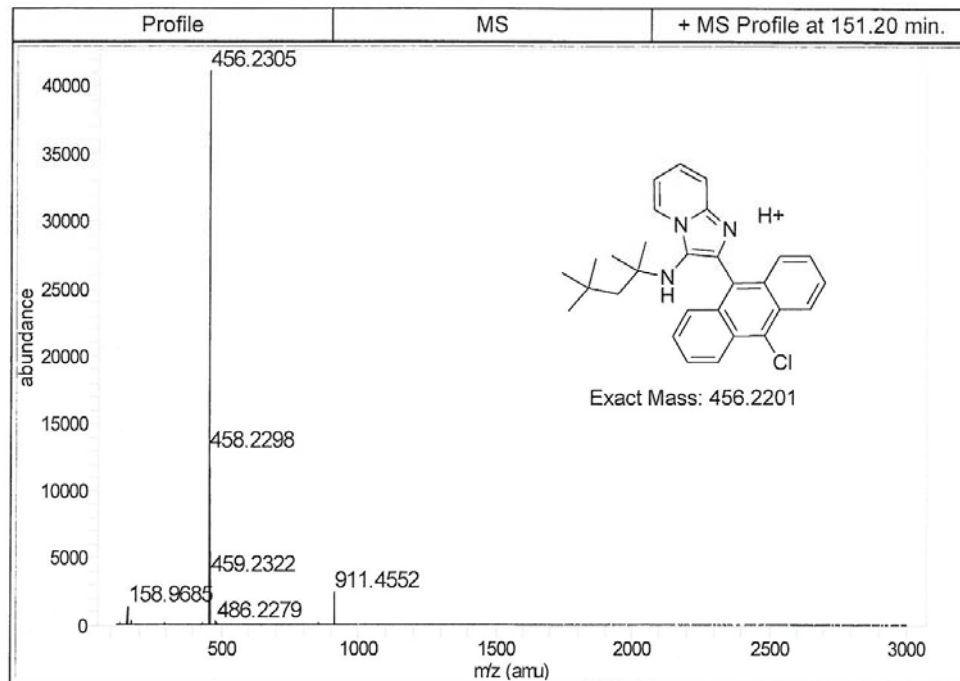

# 10 <sup>1</sup>H Spectrum

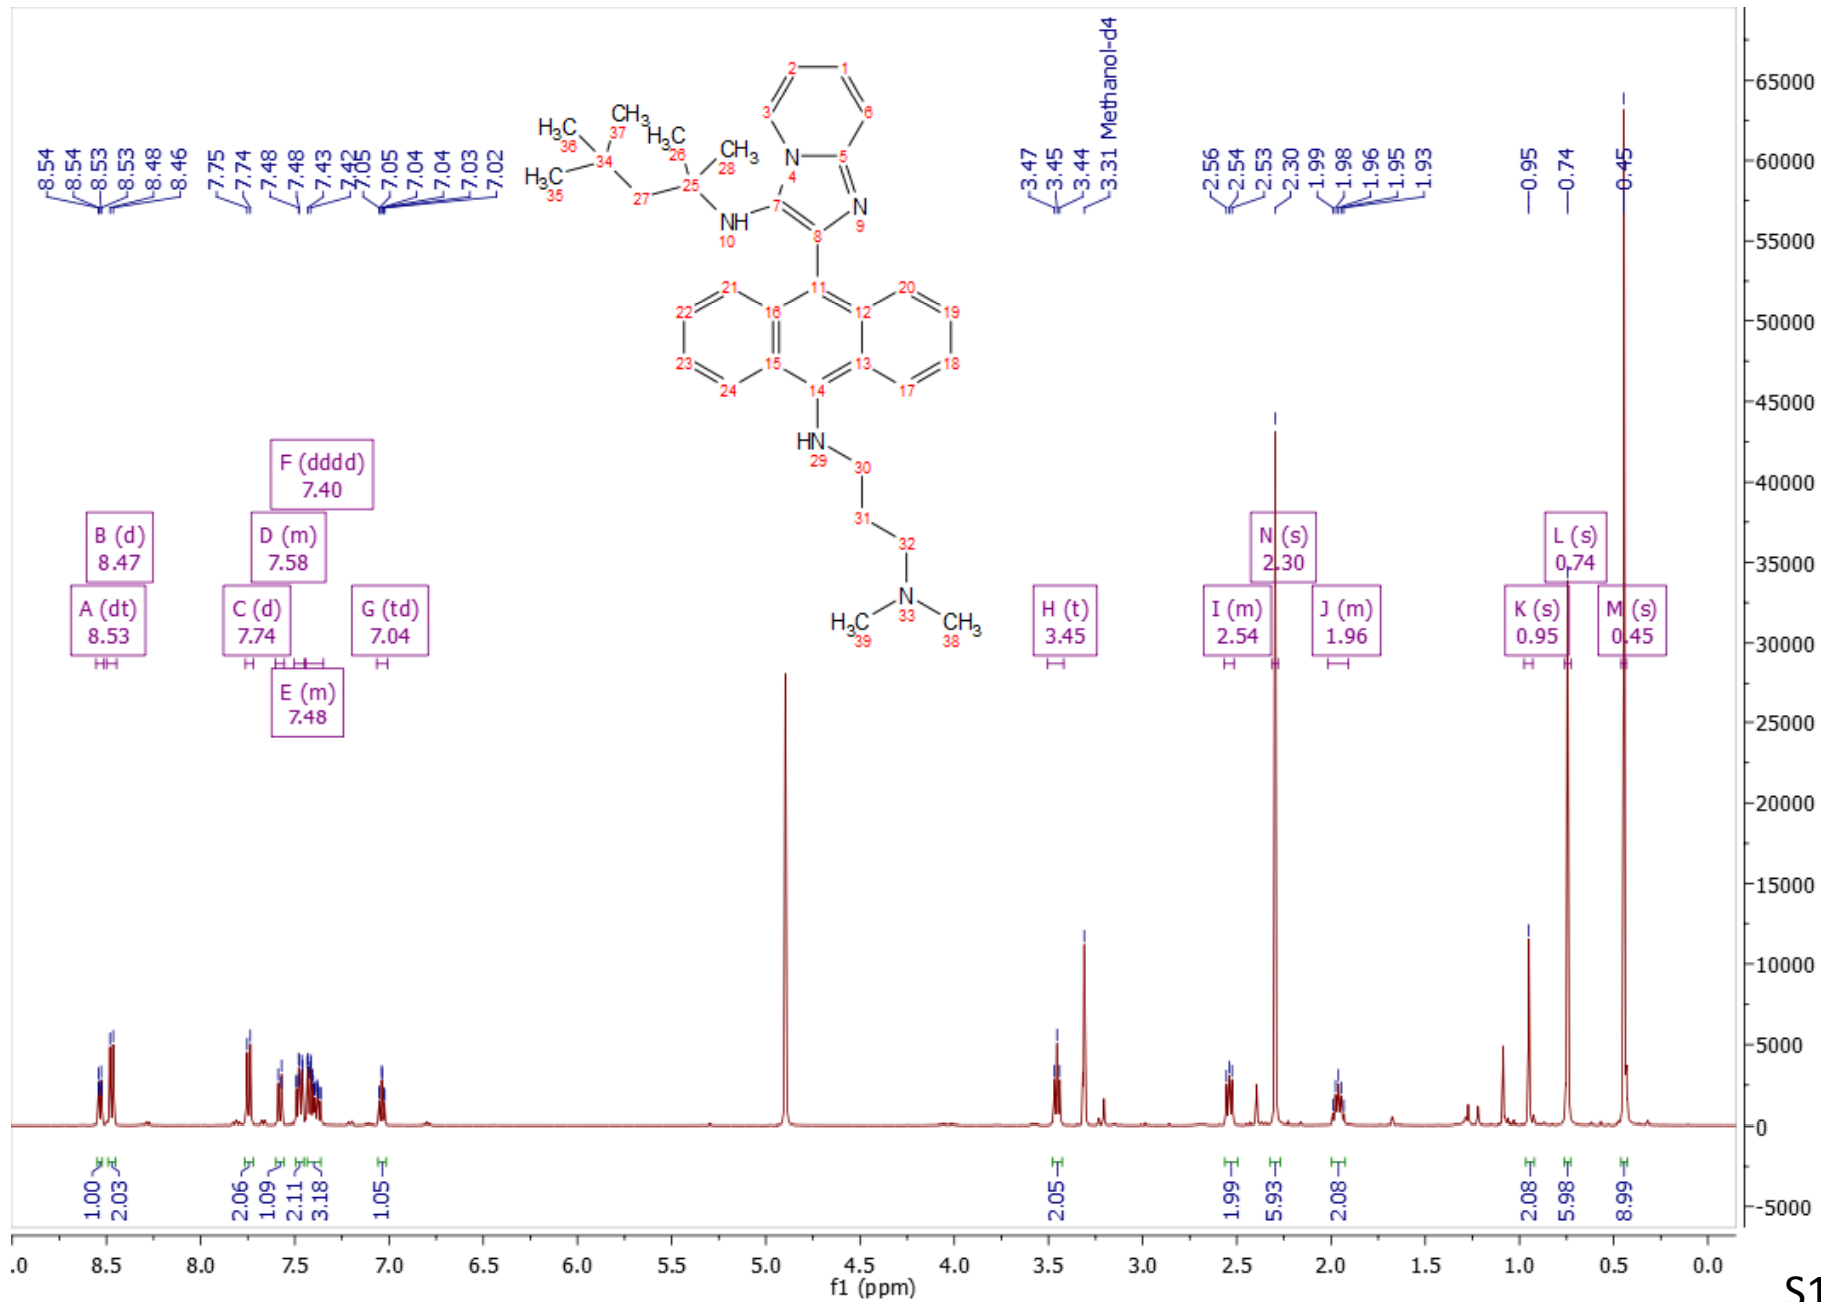

# 10 <sup>13</sup>C Spectrum

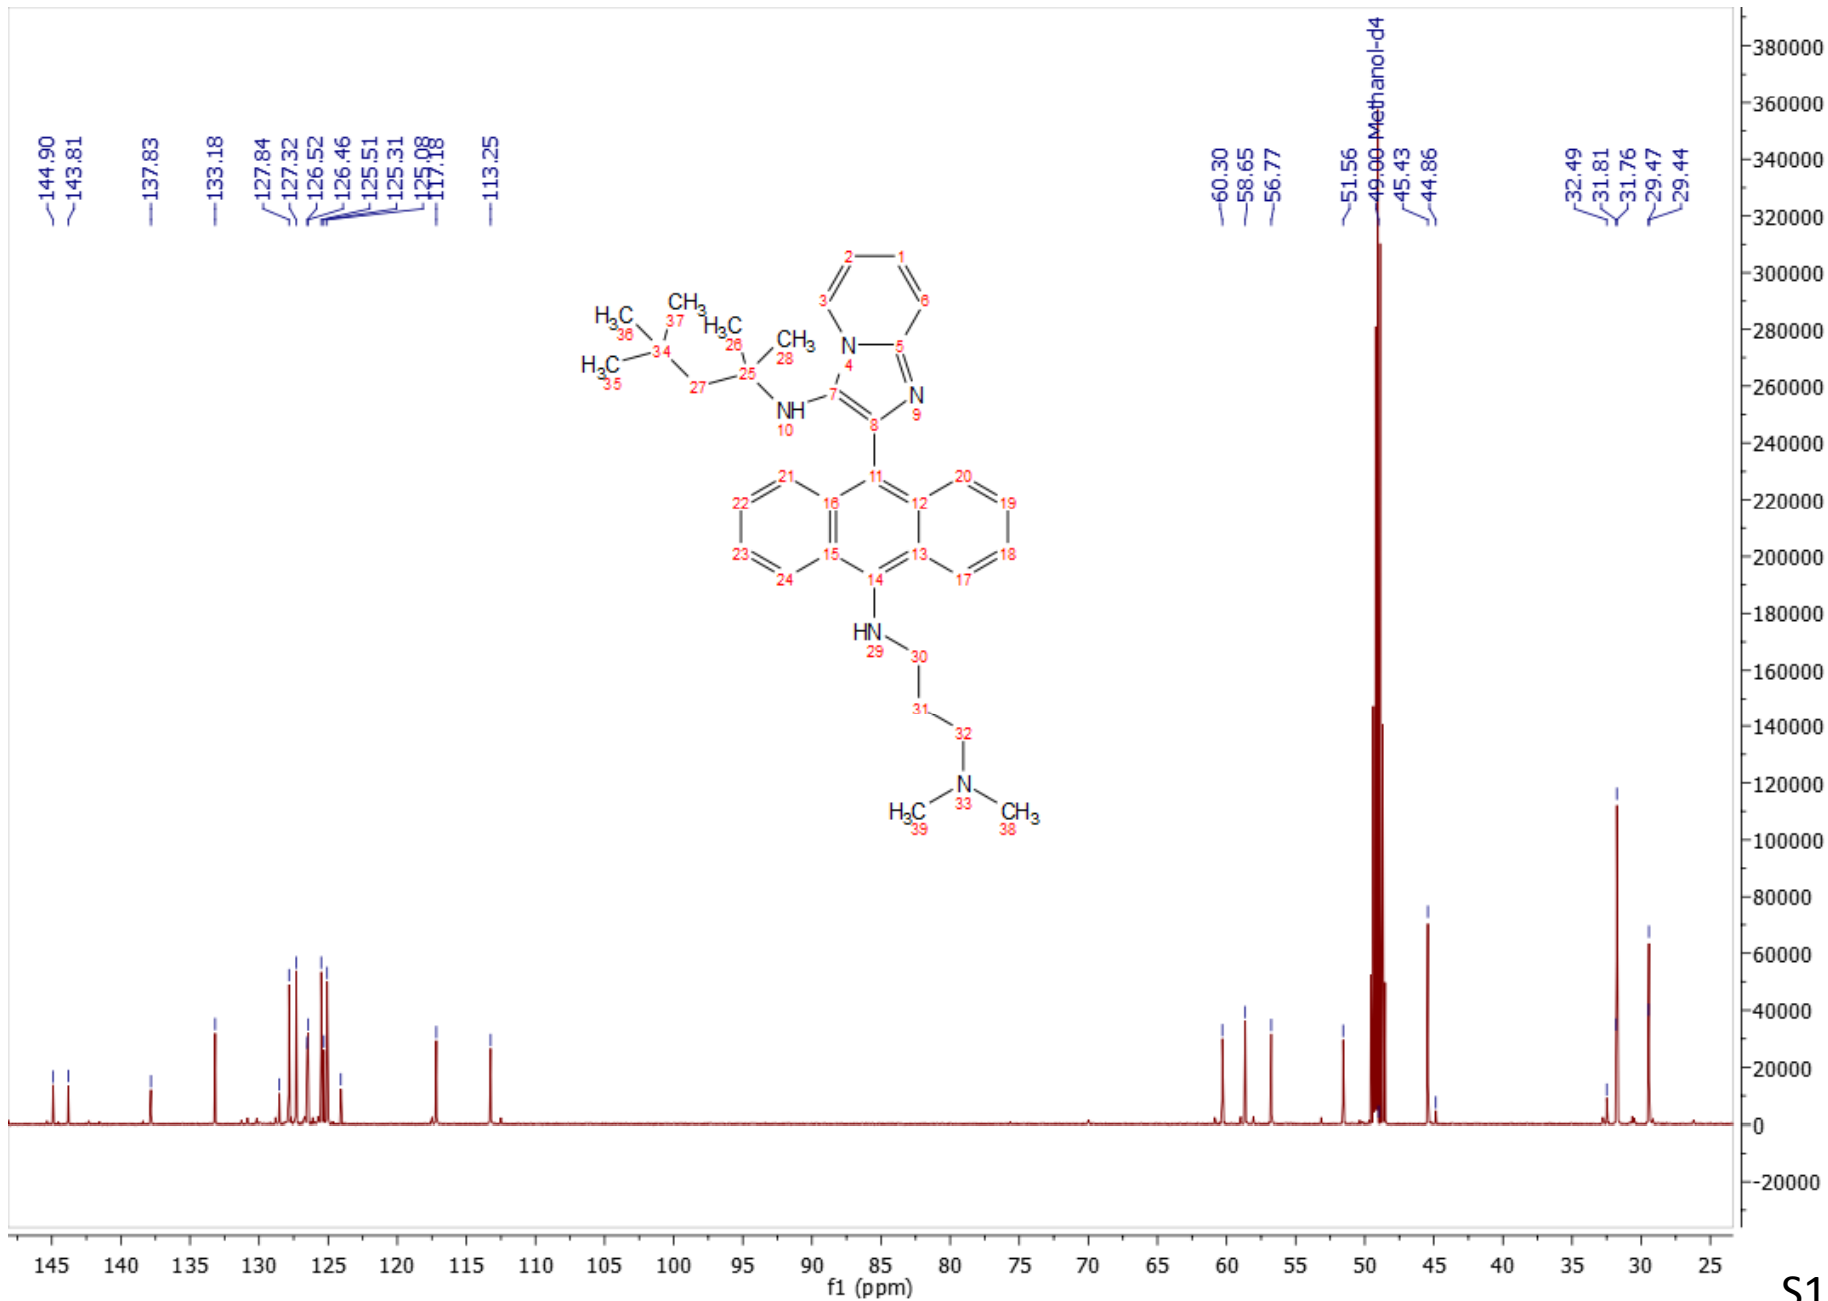

# 10 LC-MS

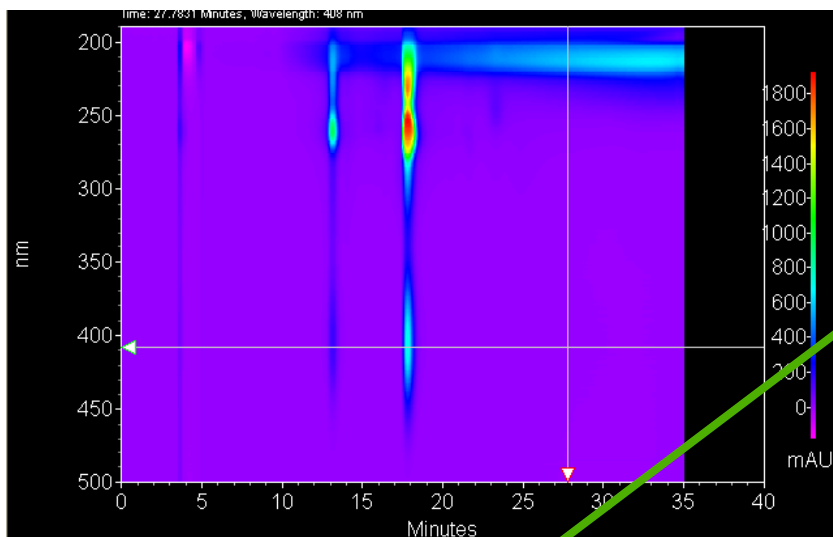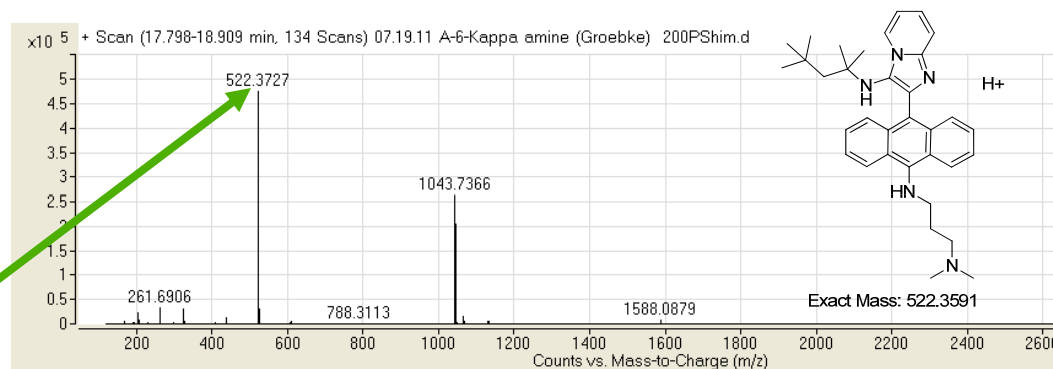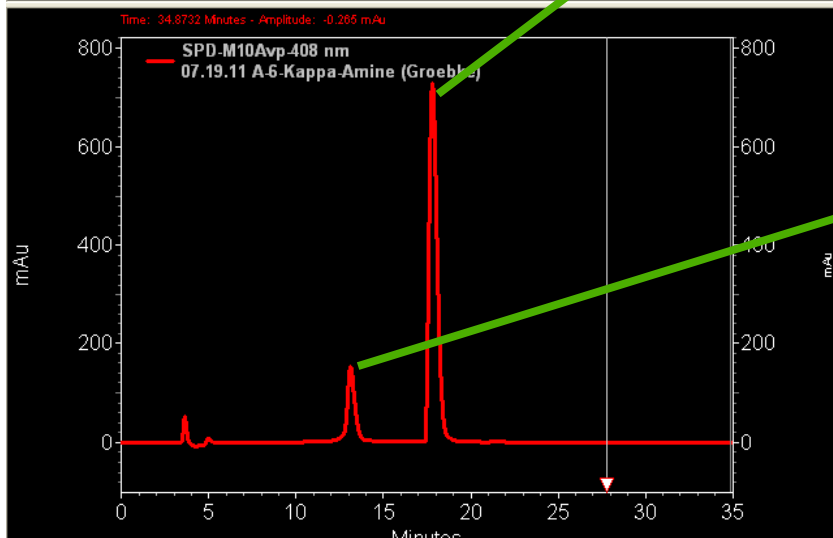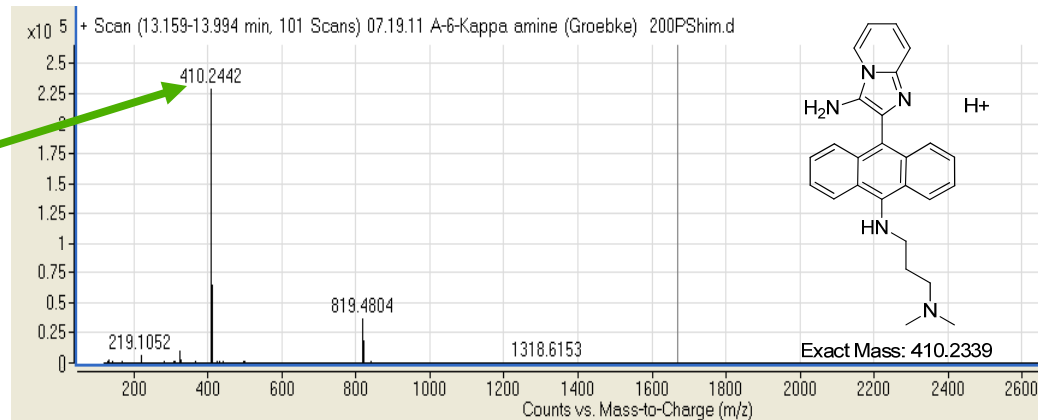



# 11 <sup>1</sup>H Spectrum

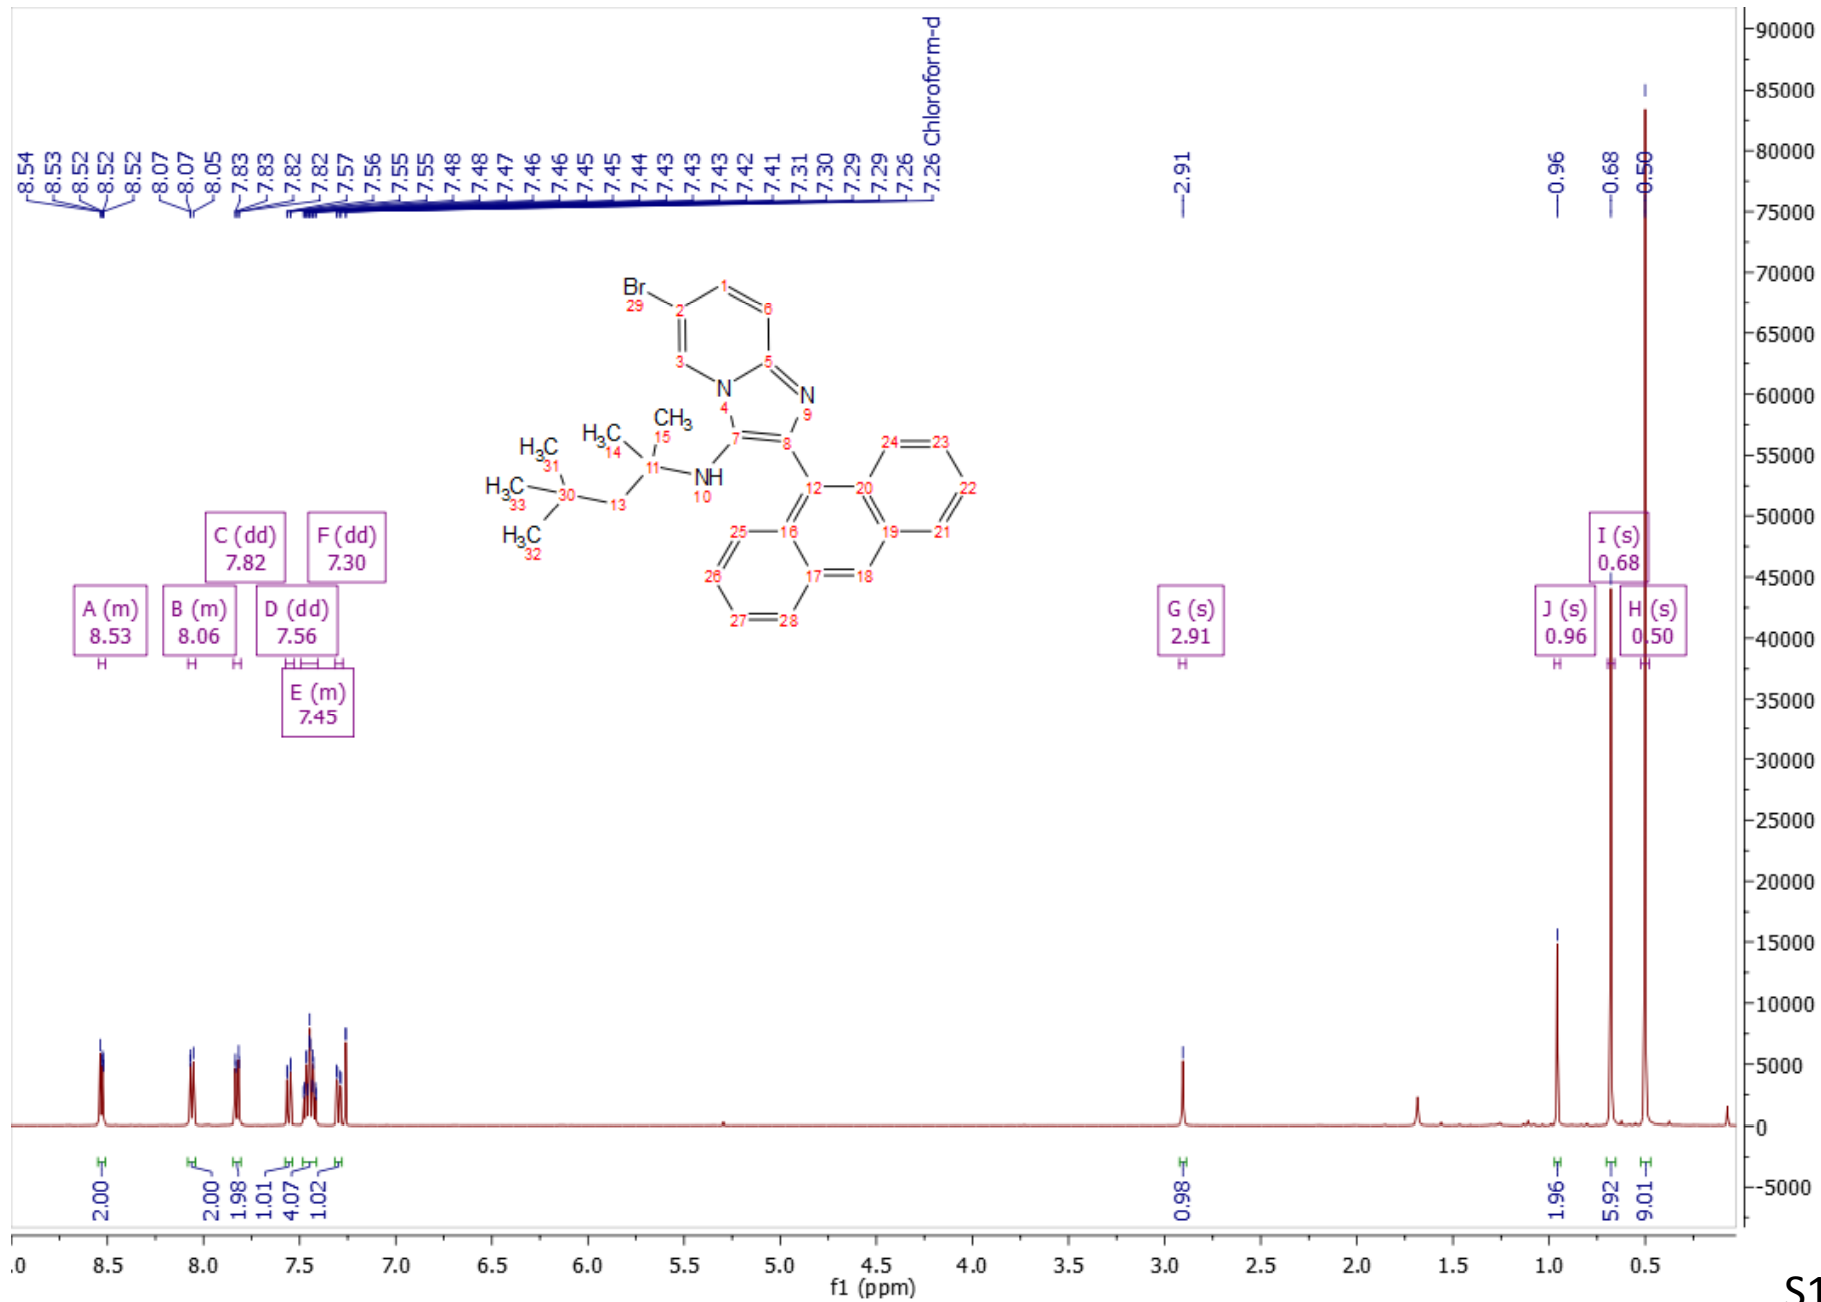

# 11 <sup>13</sup>C Spectrum

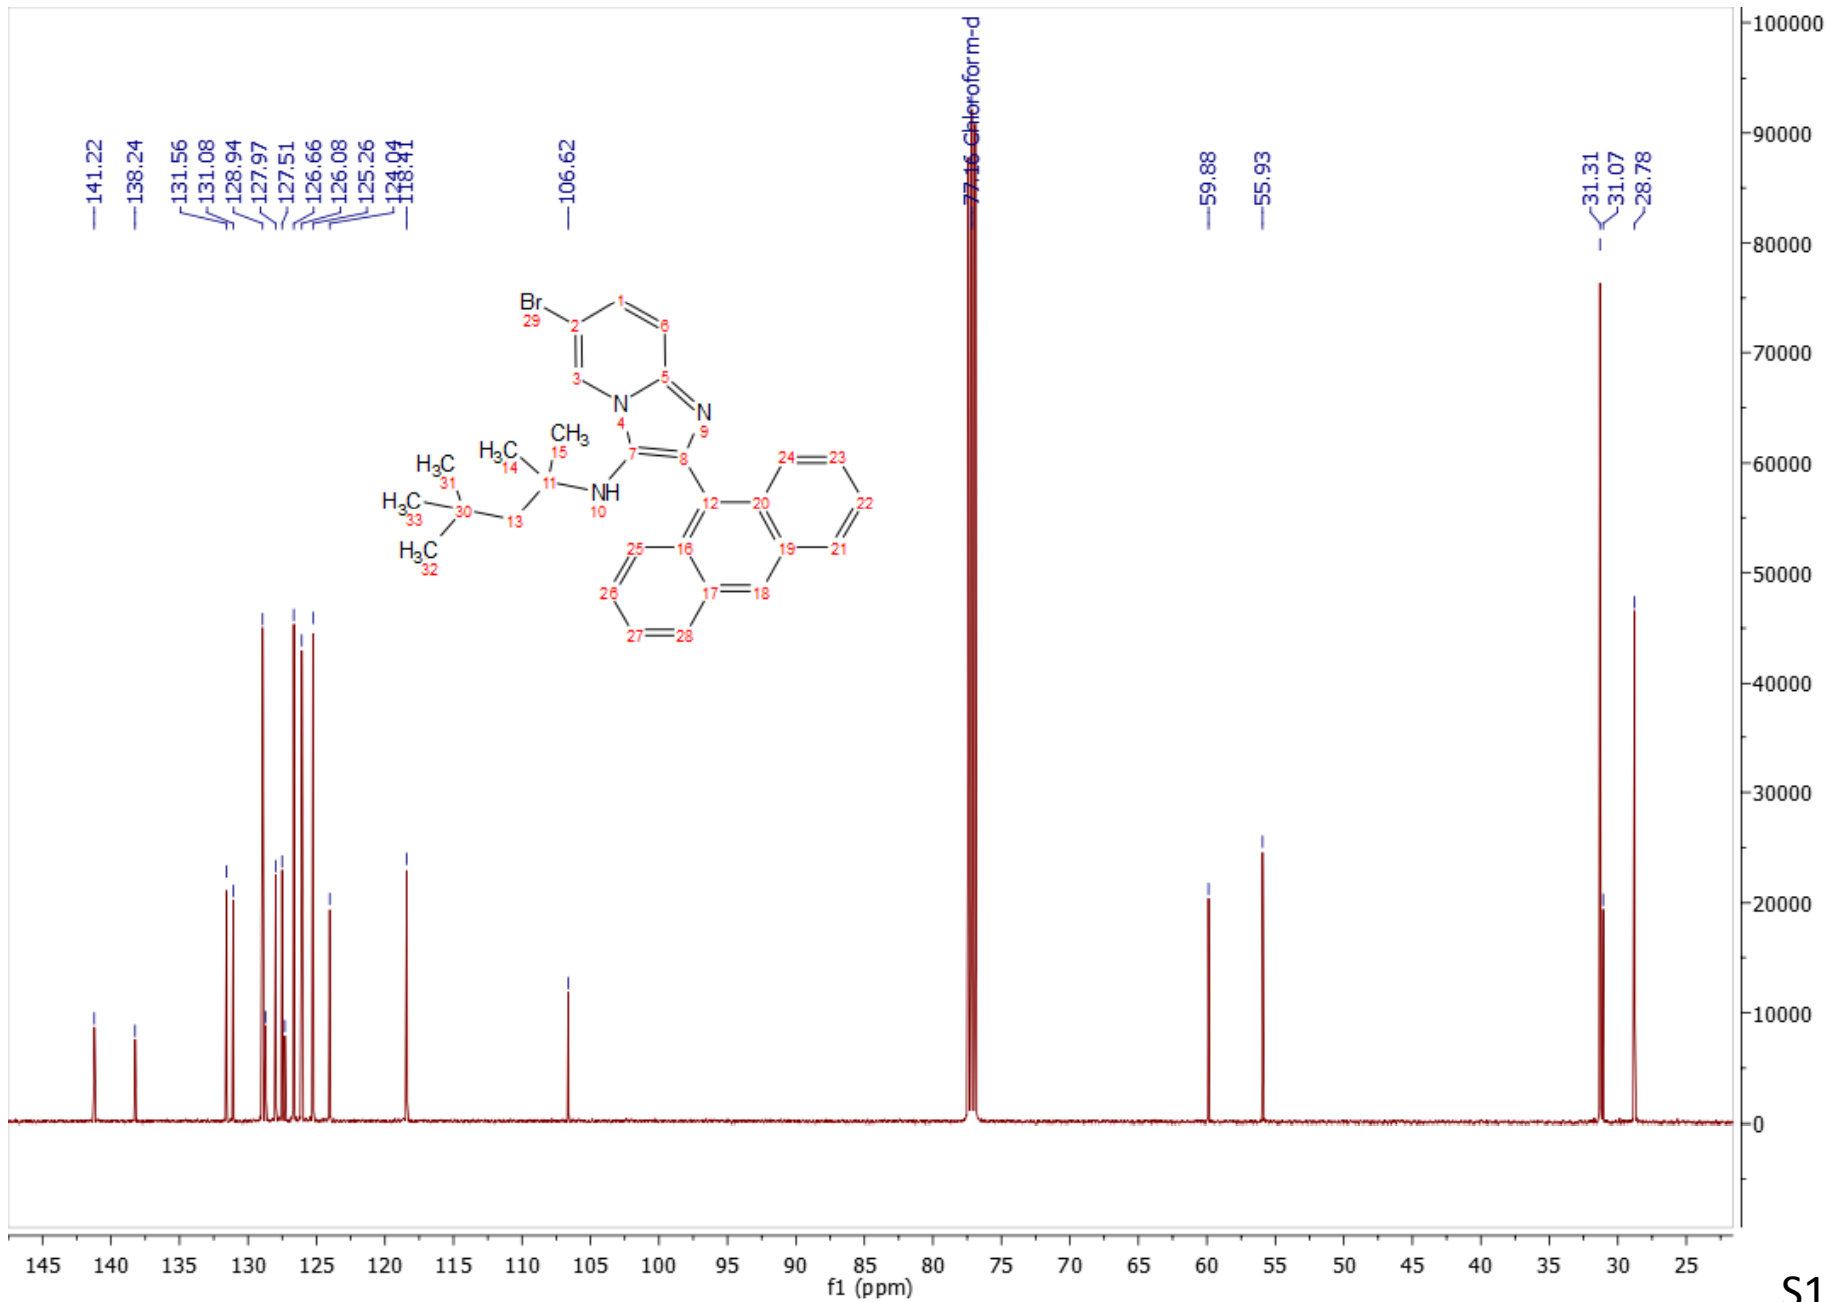

# 11 LC-MS

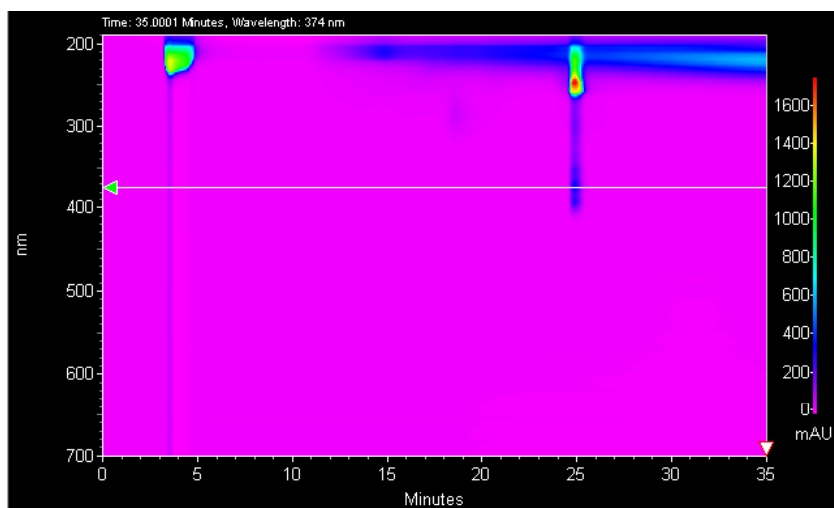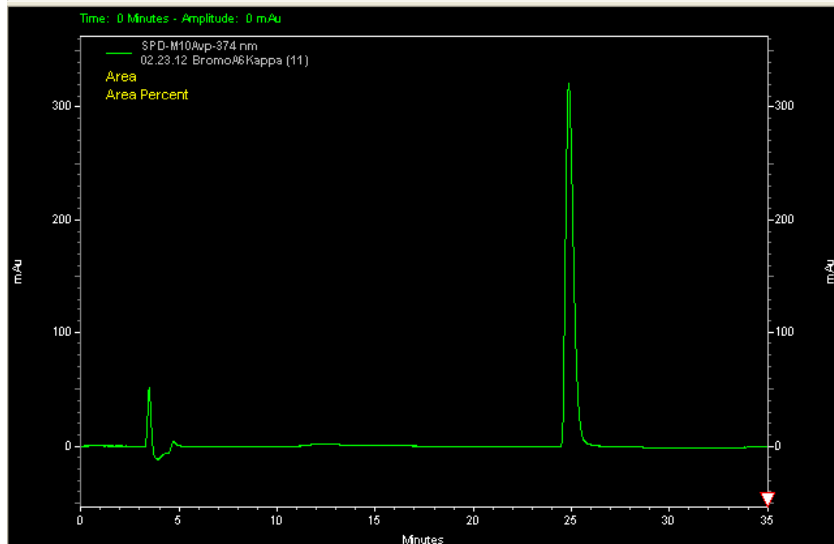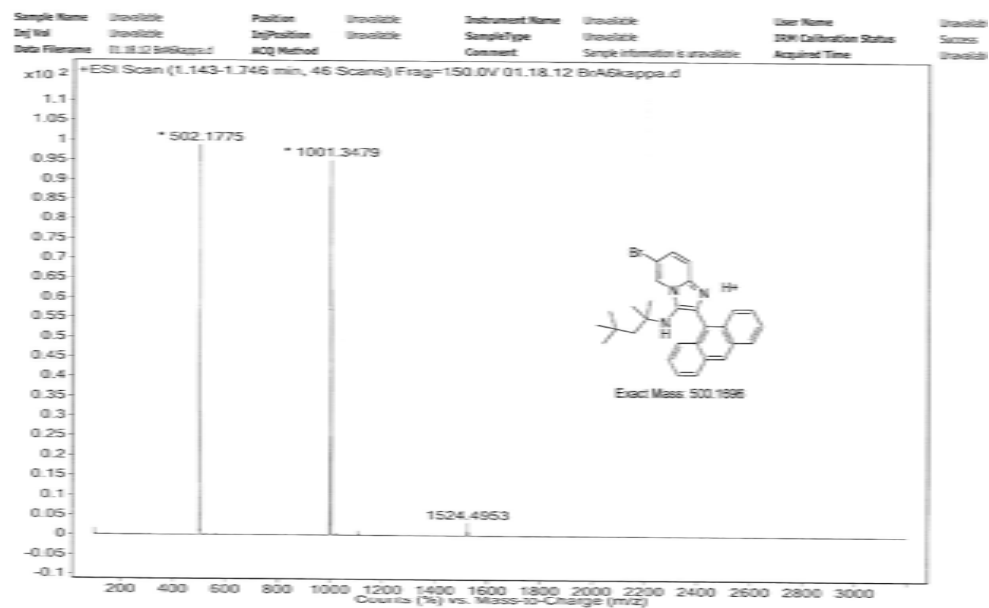

# 12 <sup>1</sup>H Spectrum

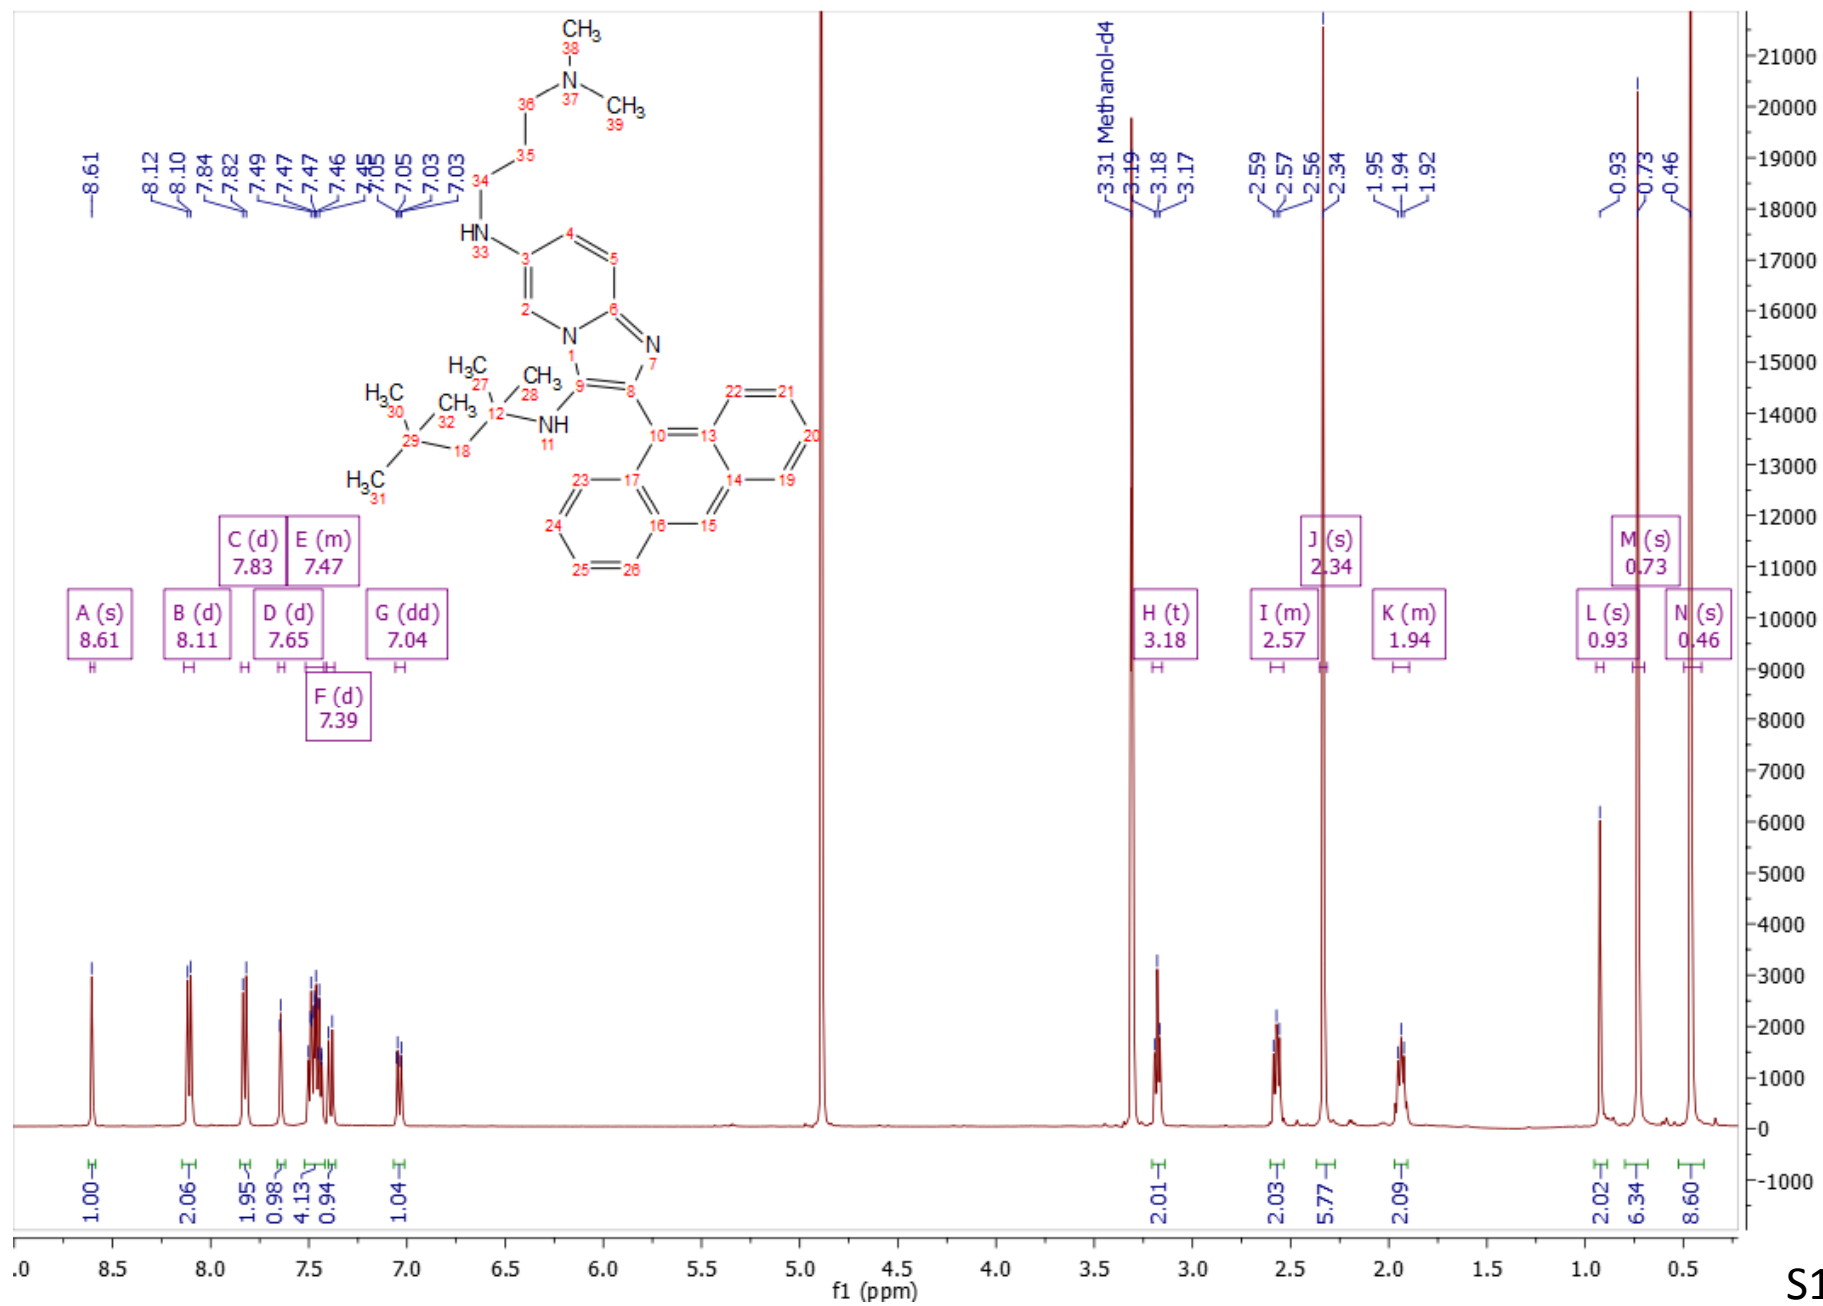

## 12 <sup>13</sup>C Spectrum

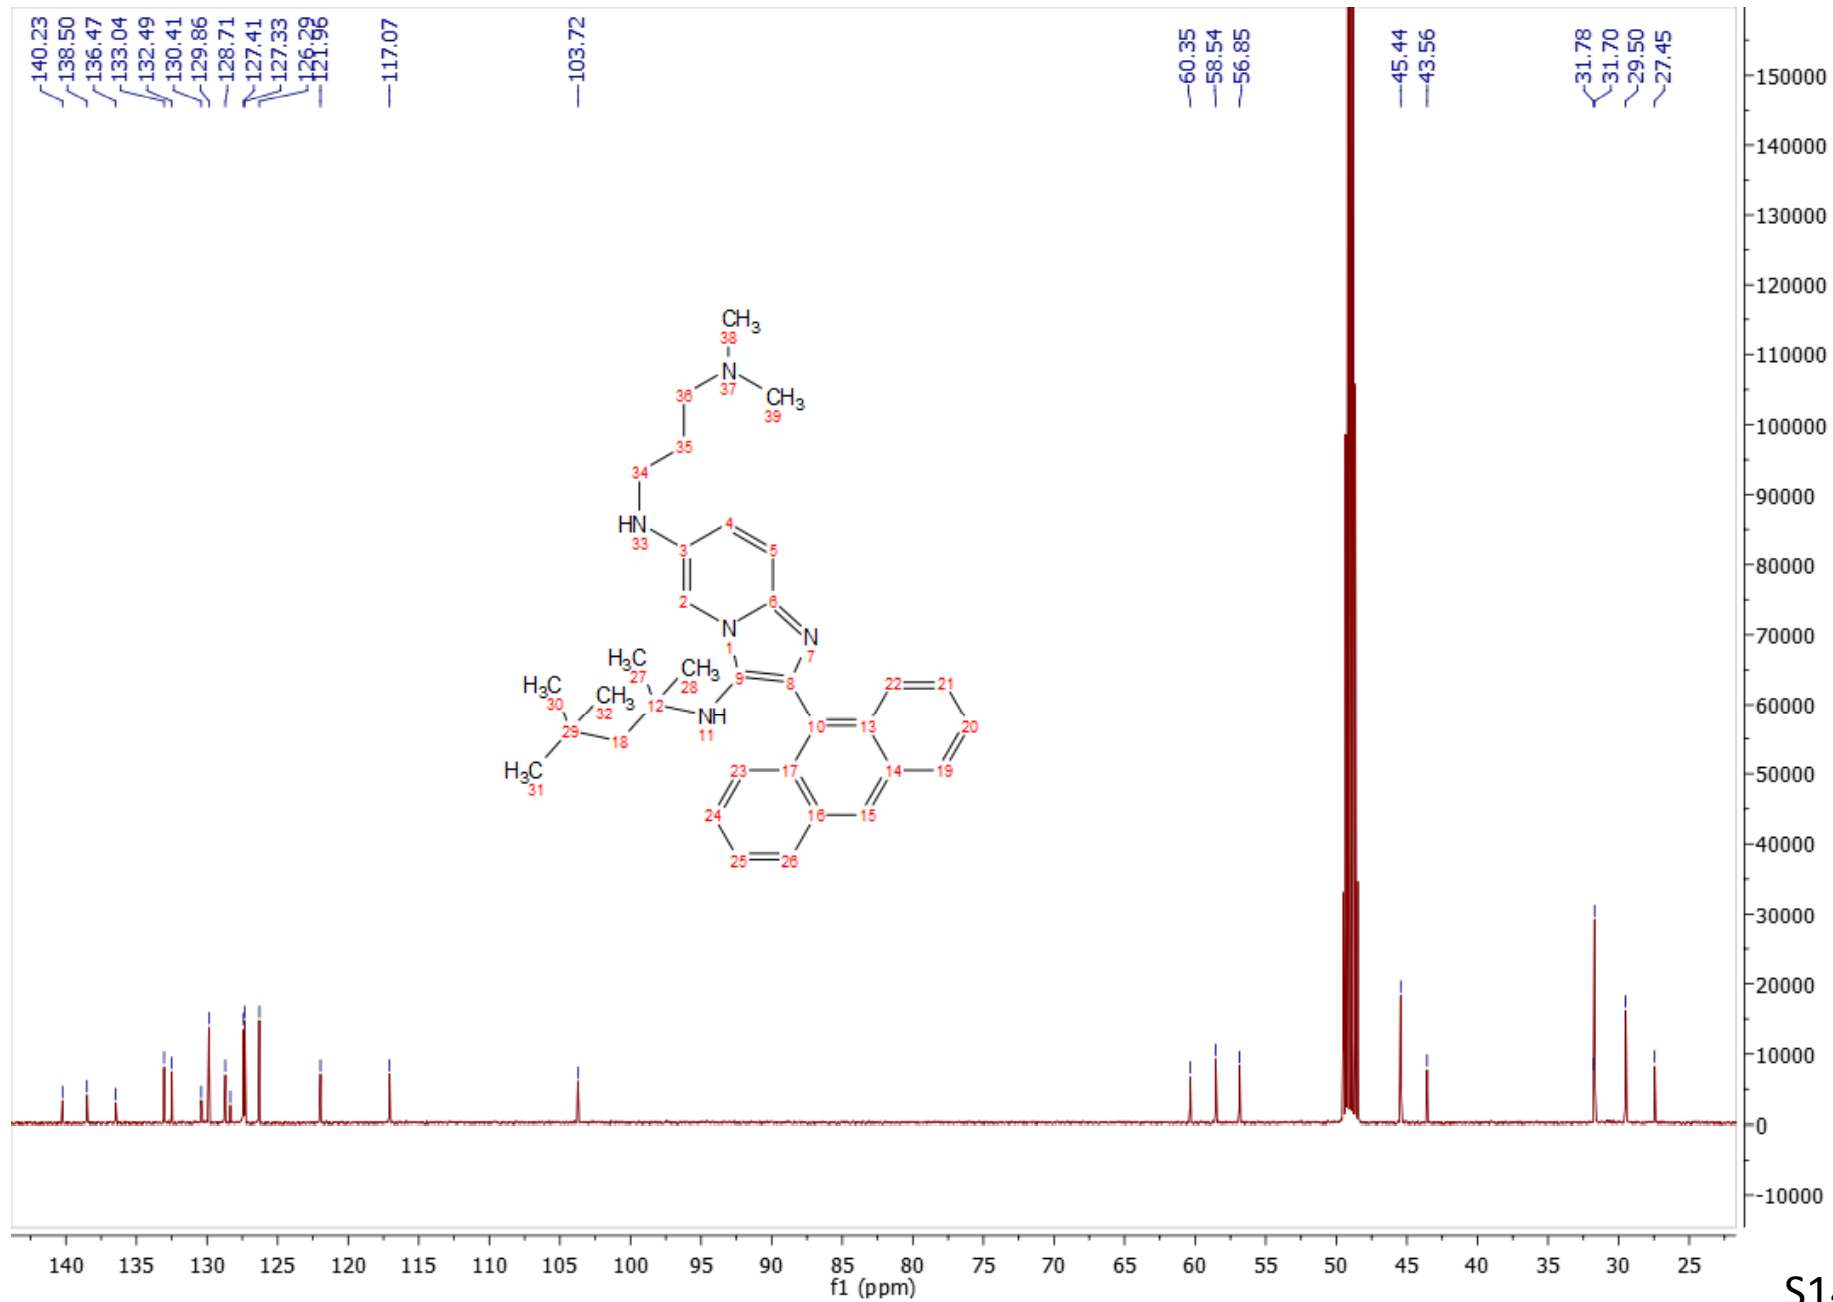

# 12 LC-MS

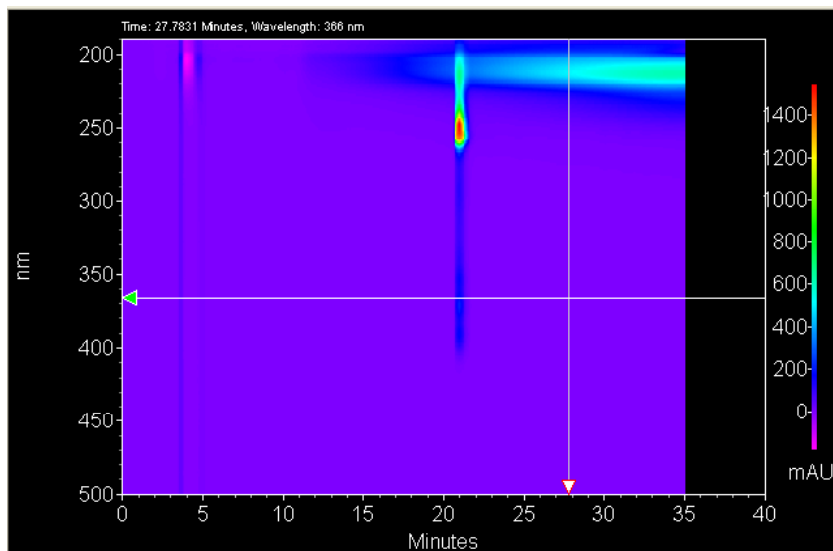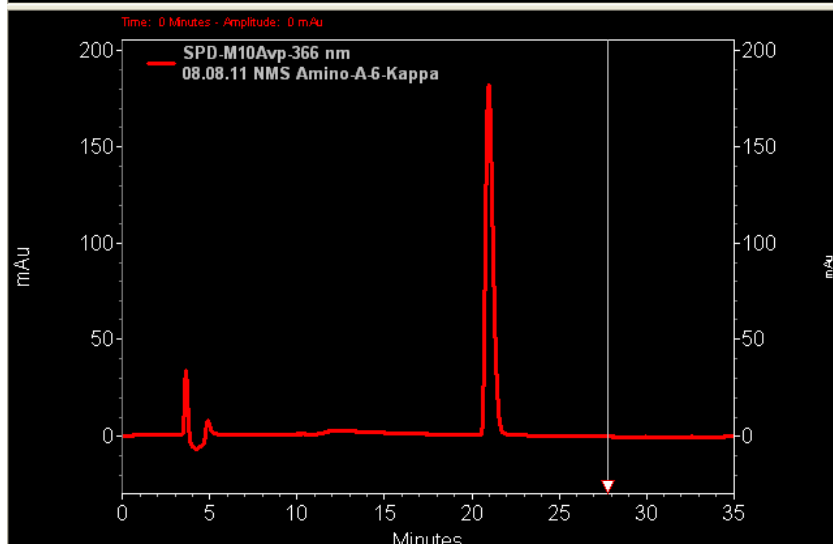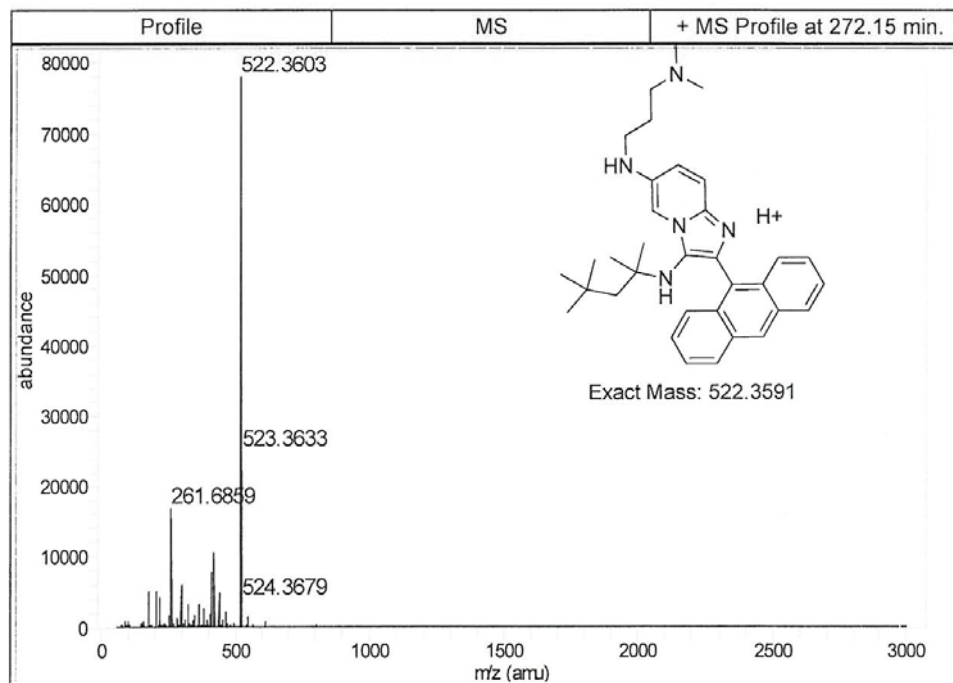

# 13 <sup>1</sup>H Spectrum

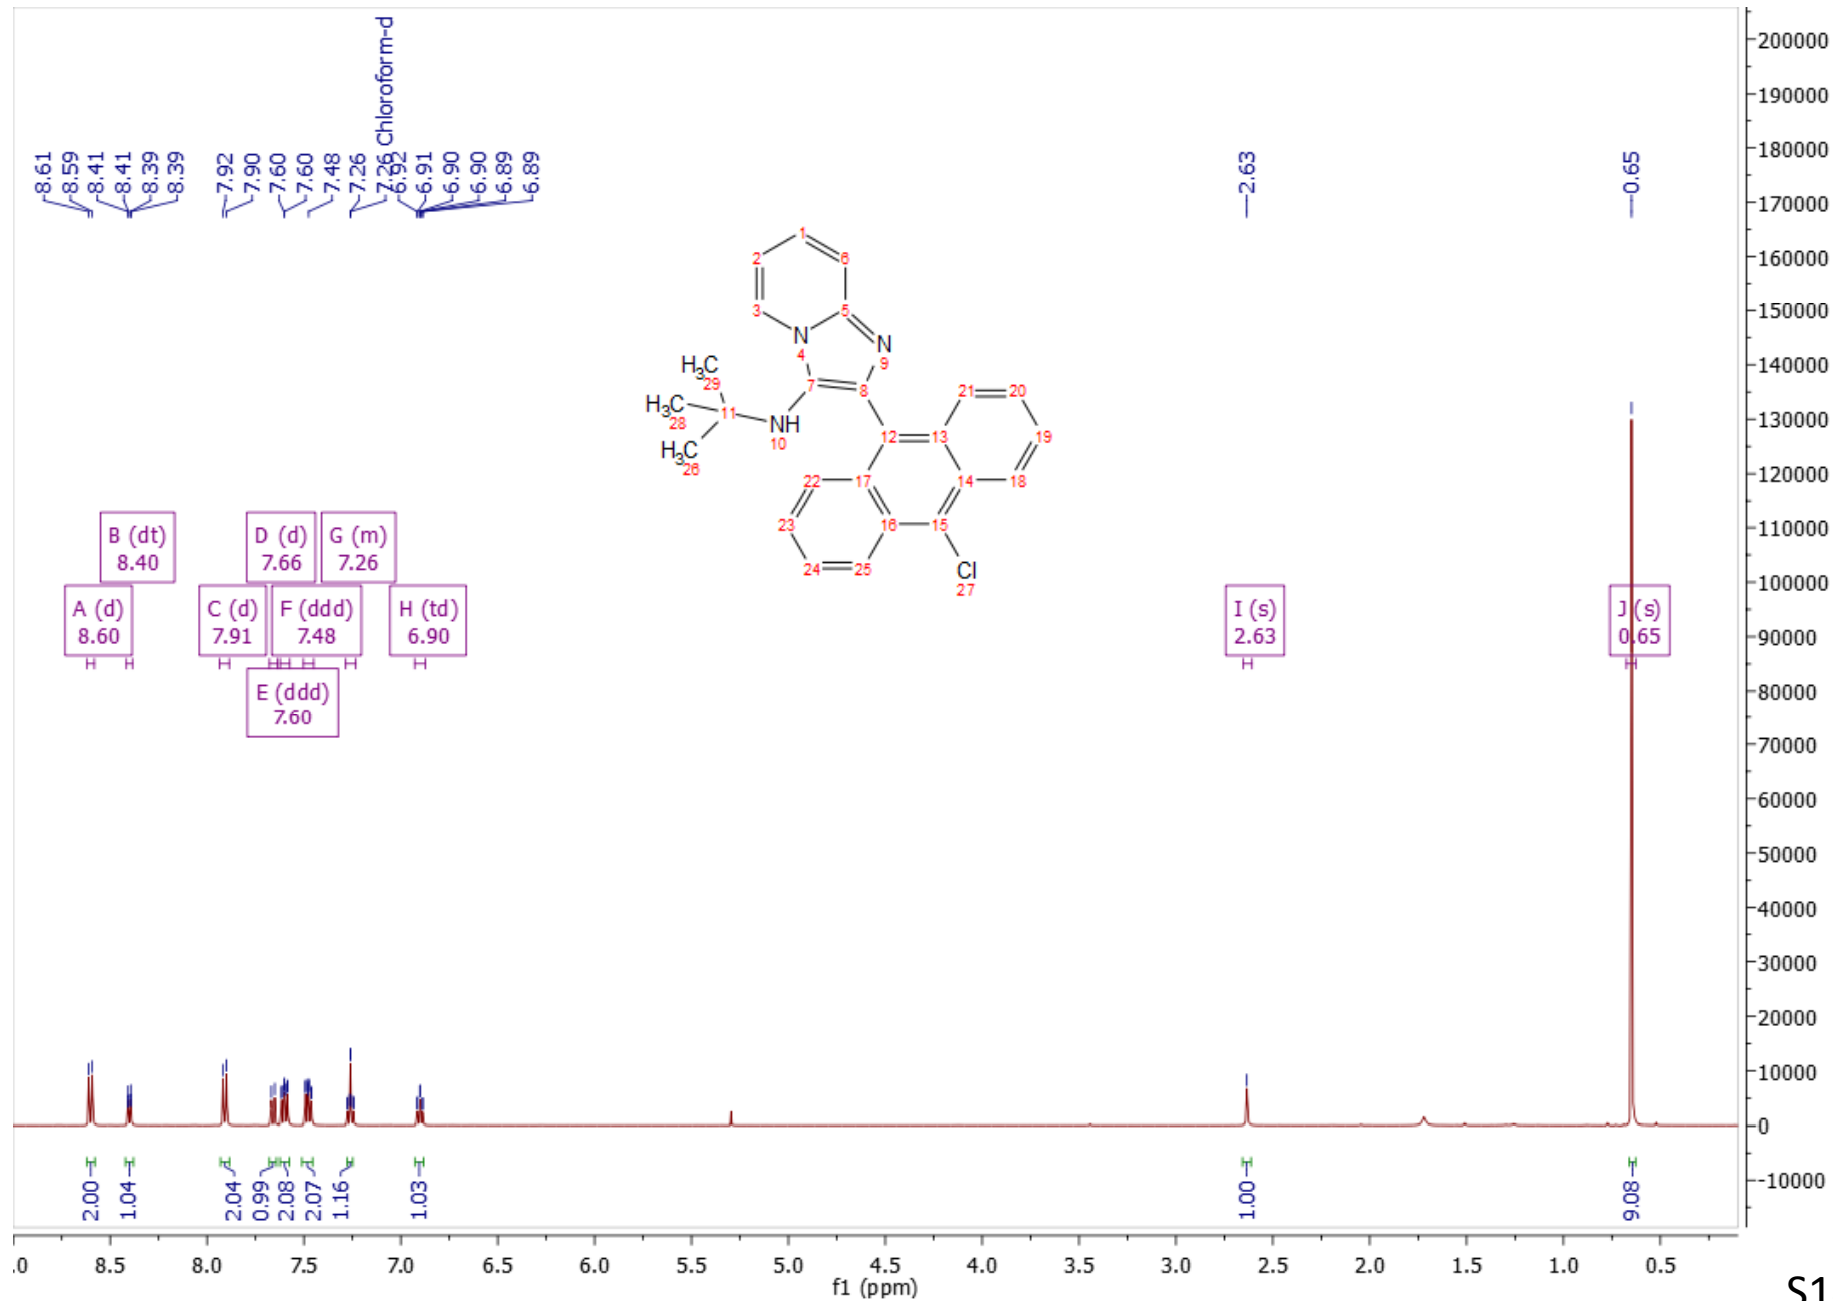

# 13

<sup>13</sup>C Spectrum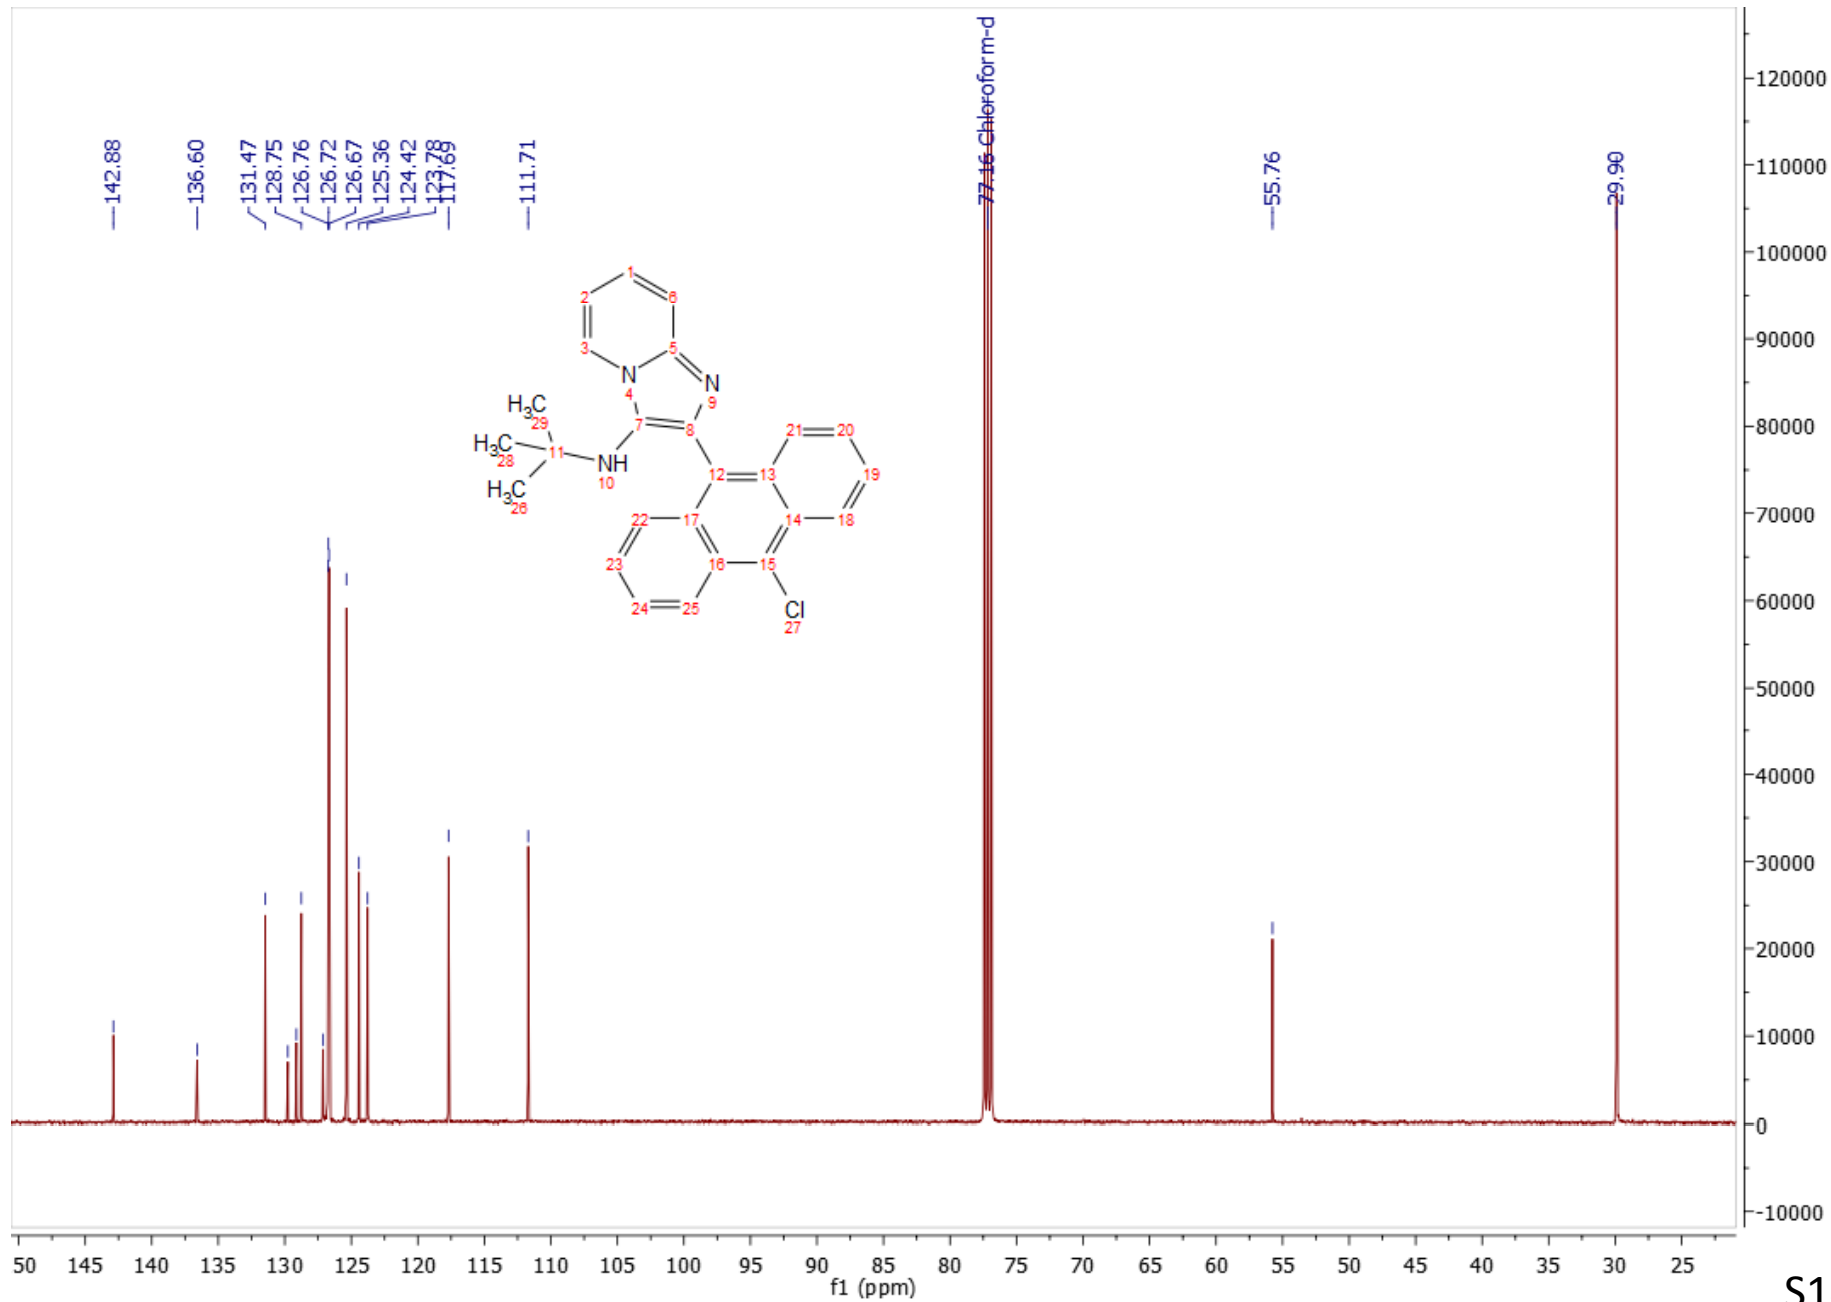



# 13 LC-MS

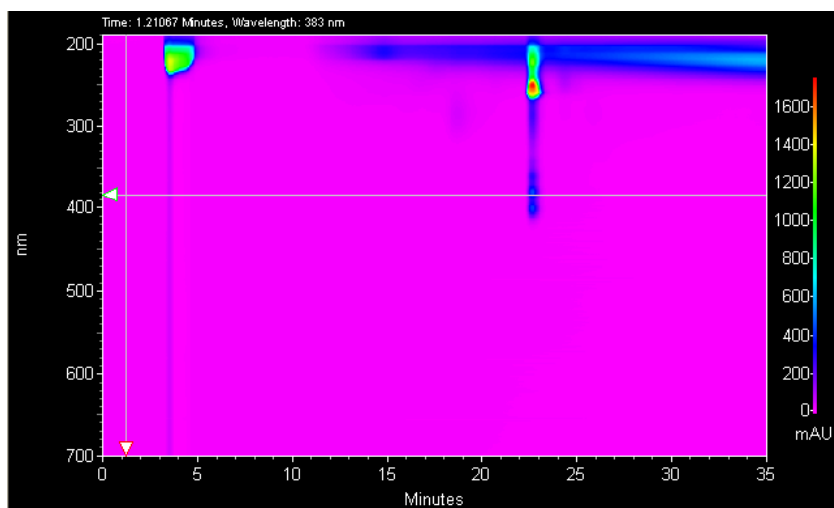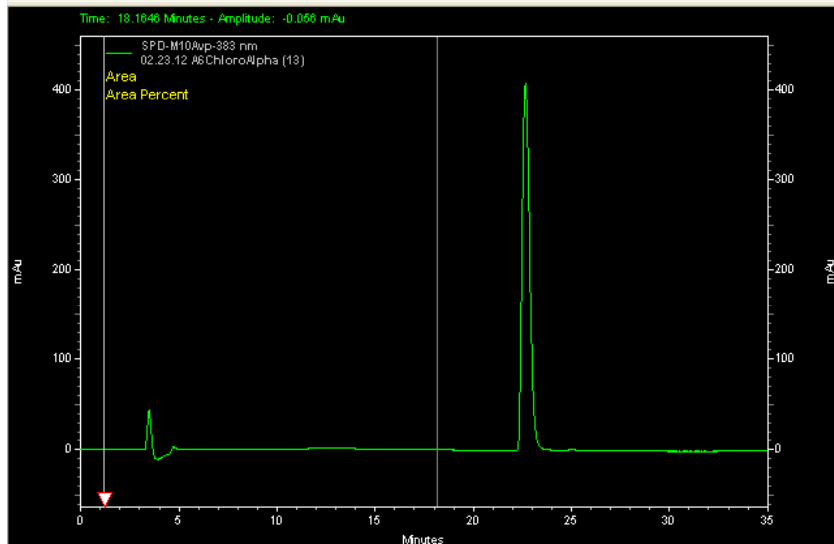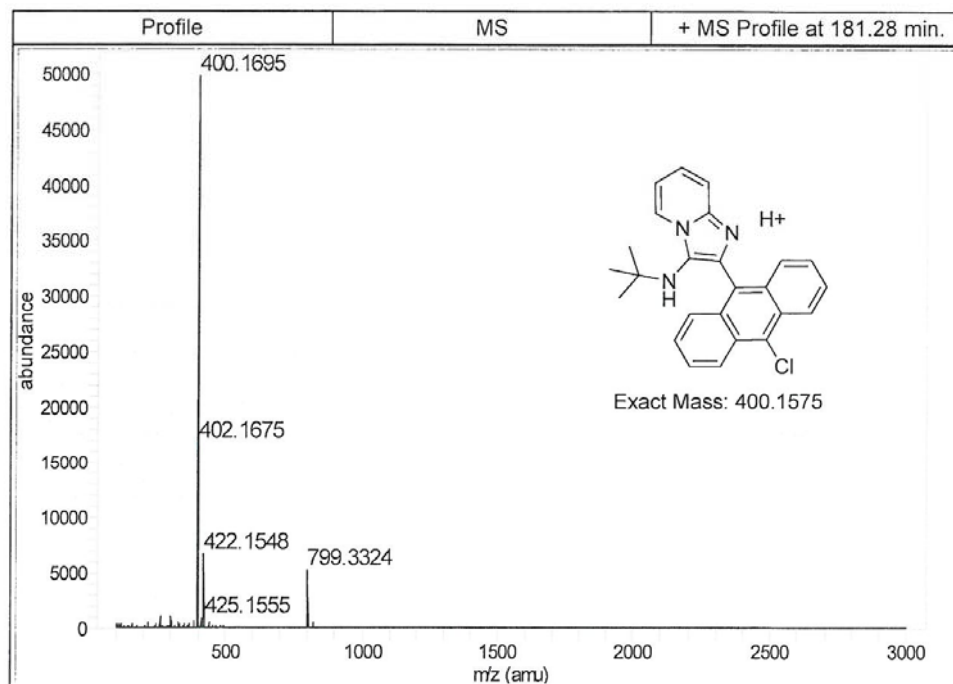

# 14 <sup>1</sup>H Spectrum

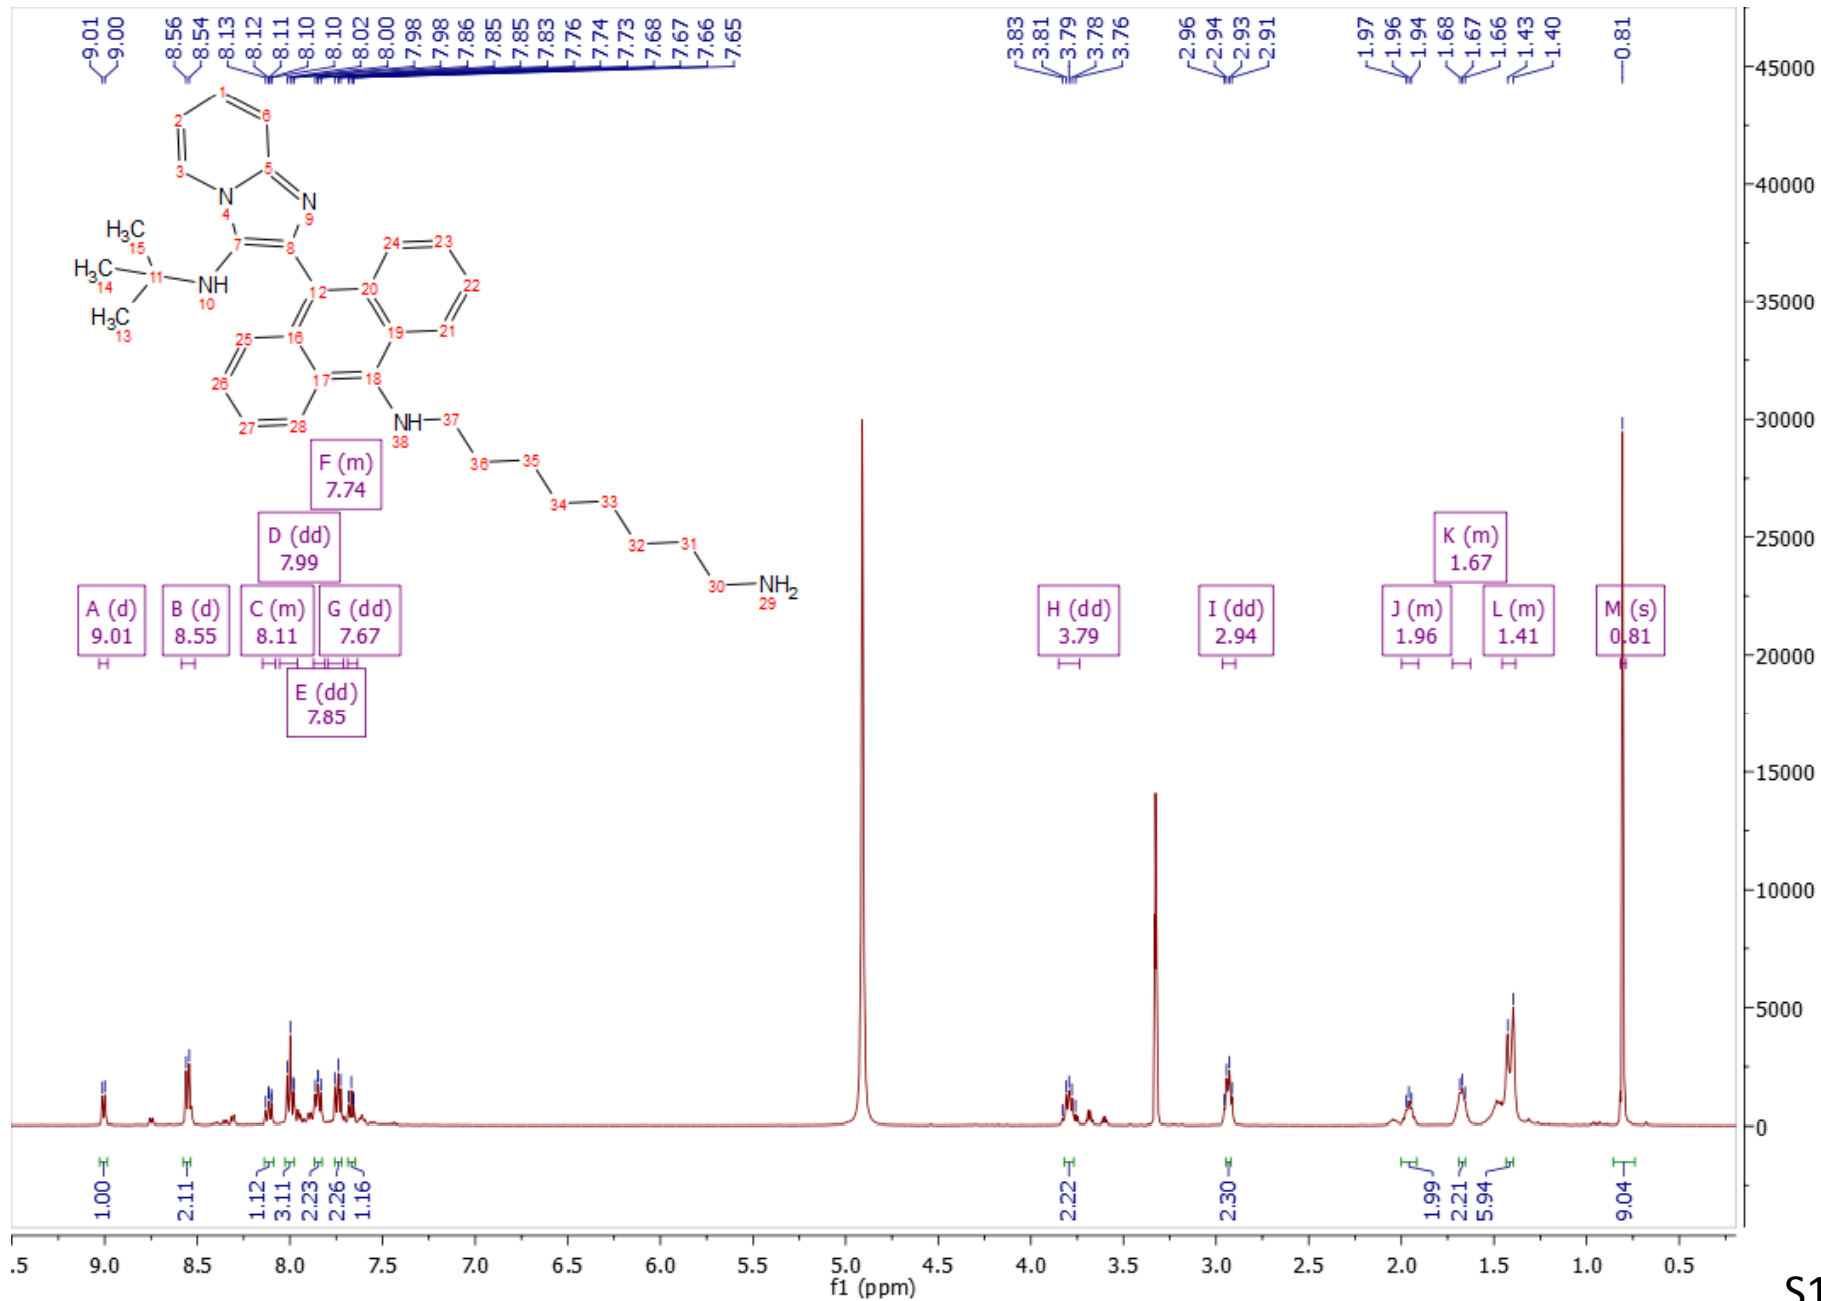

# 14 <sup>13</sup>C Spectrum

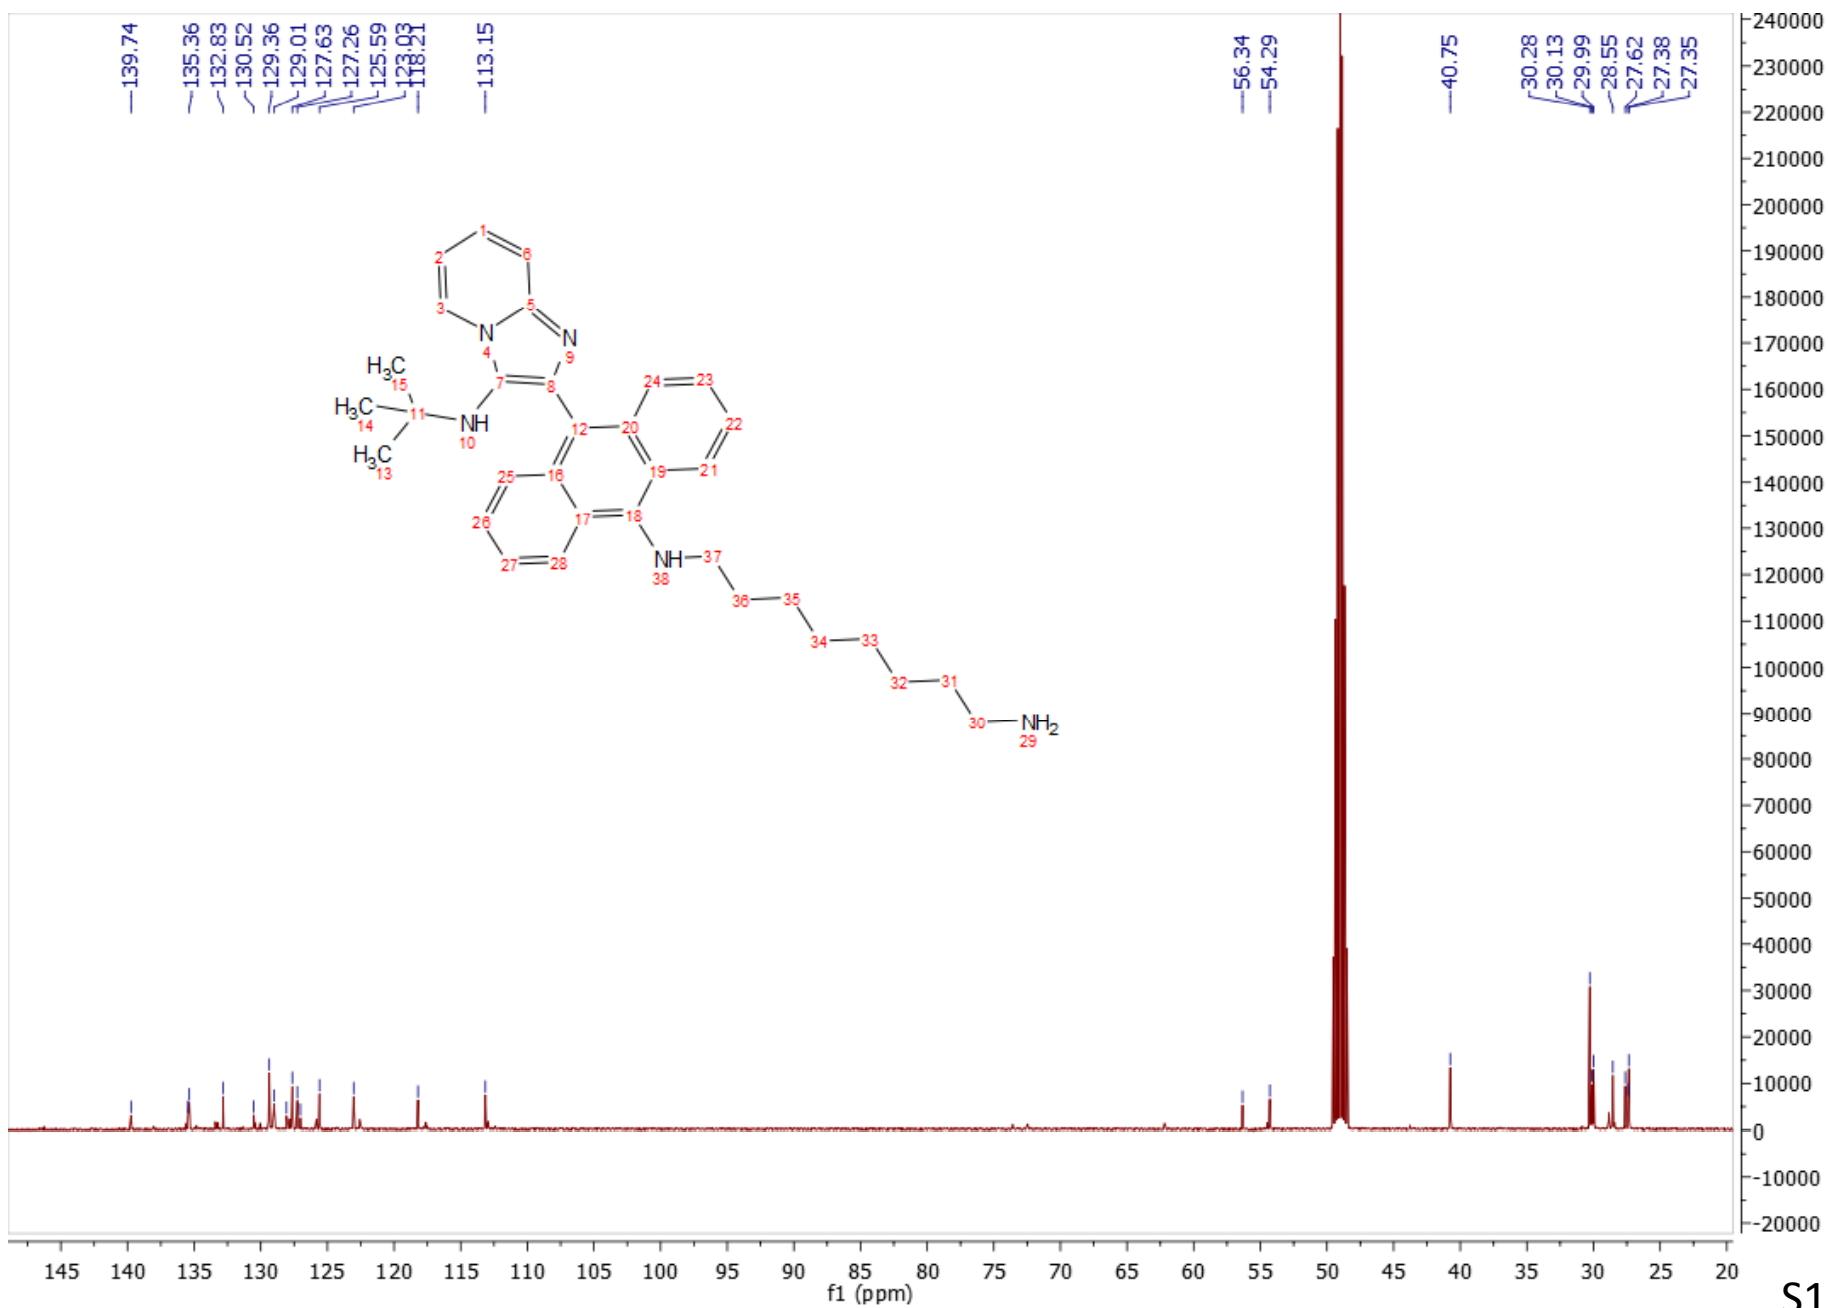

# 14 LC-MS

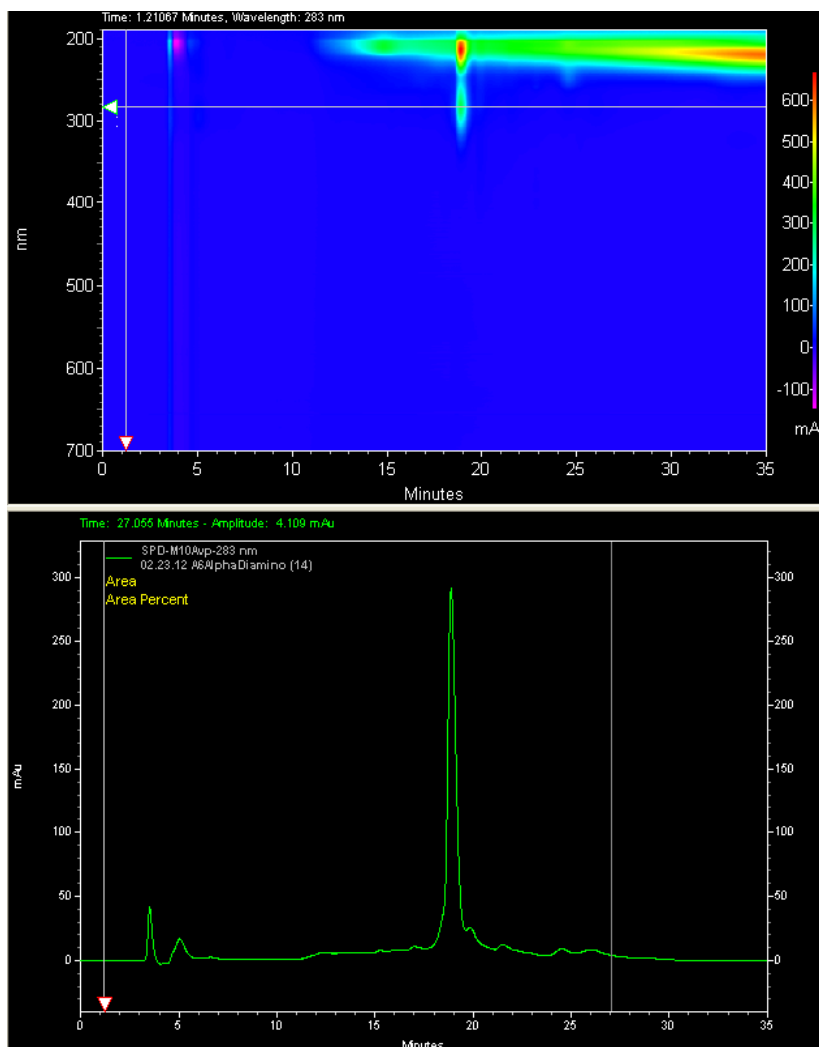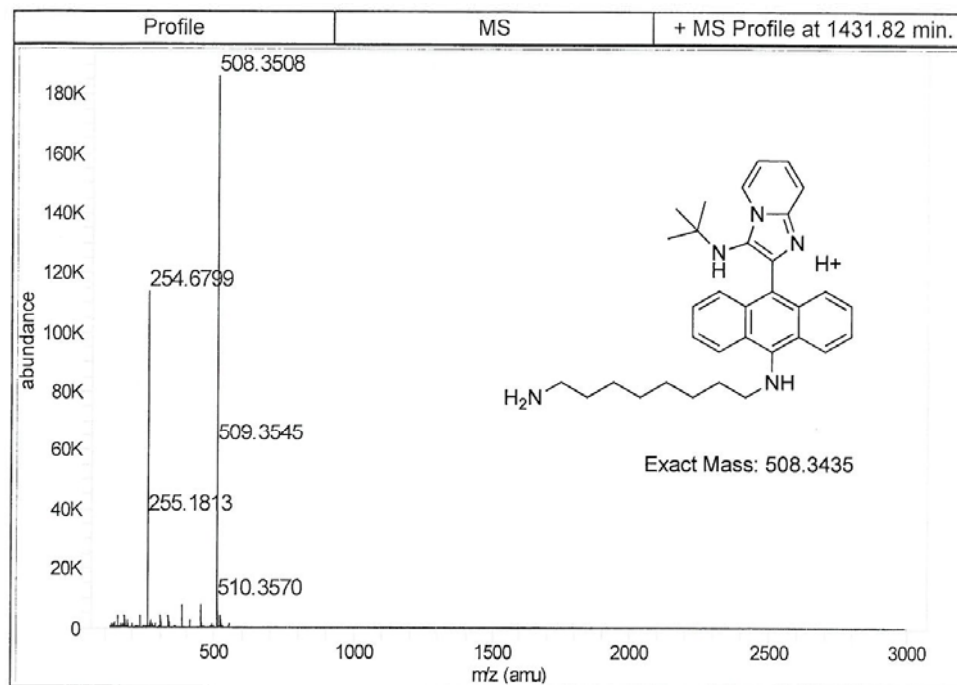

# 15 <sup>1</sup>H Spectrum

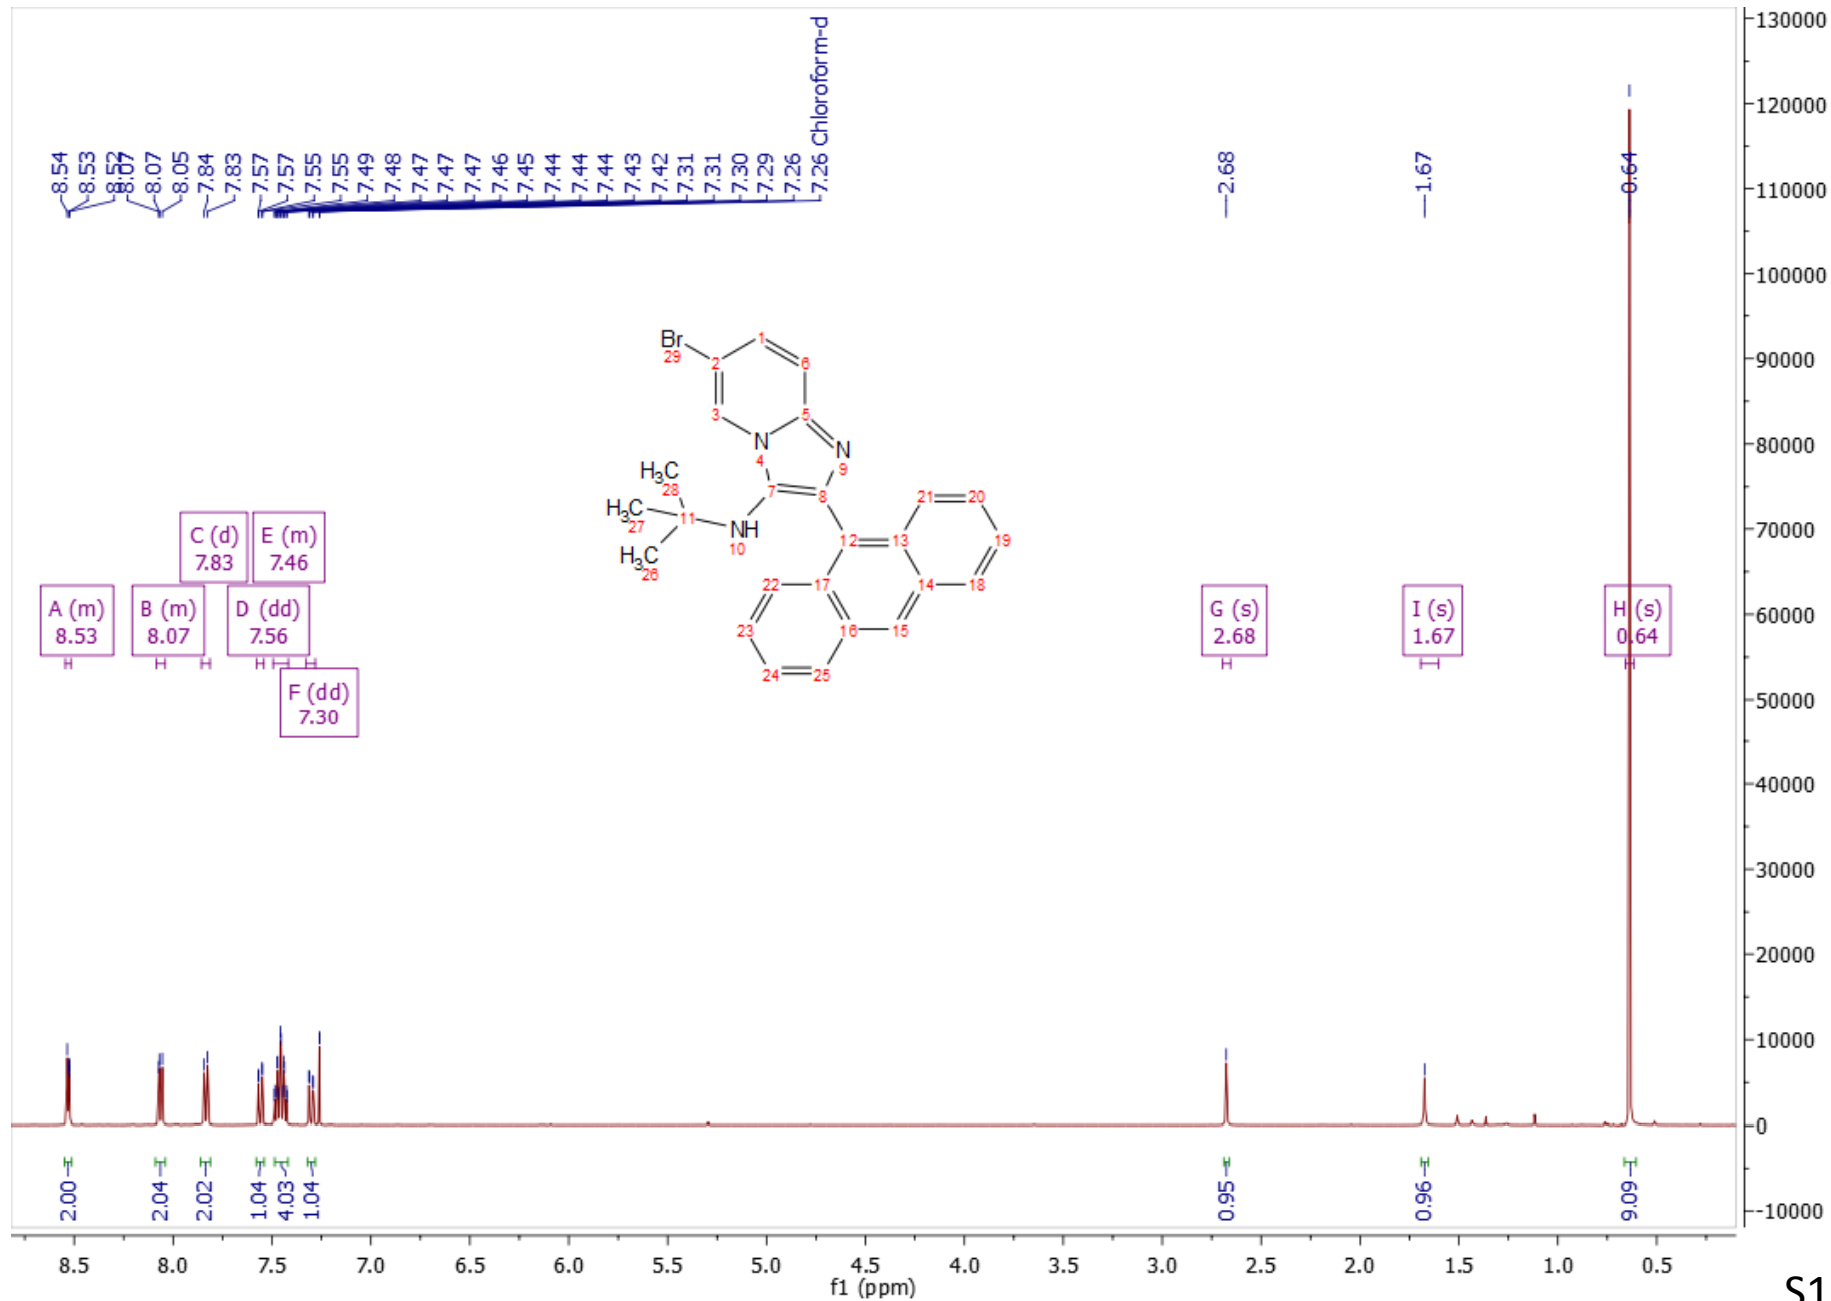

# 15 <sup>13</sup>C Spectrum

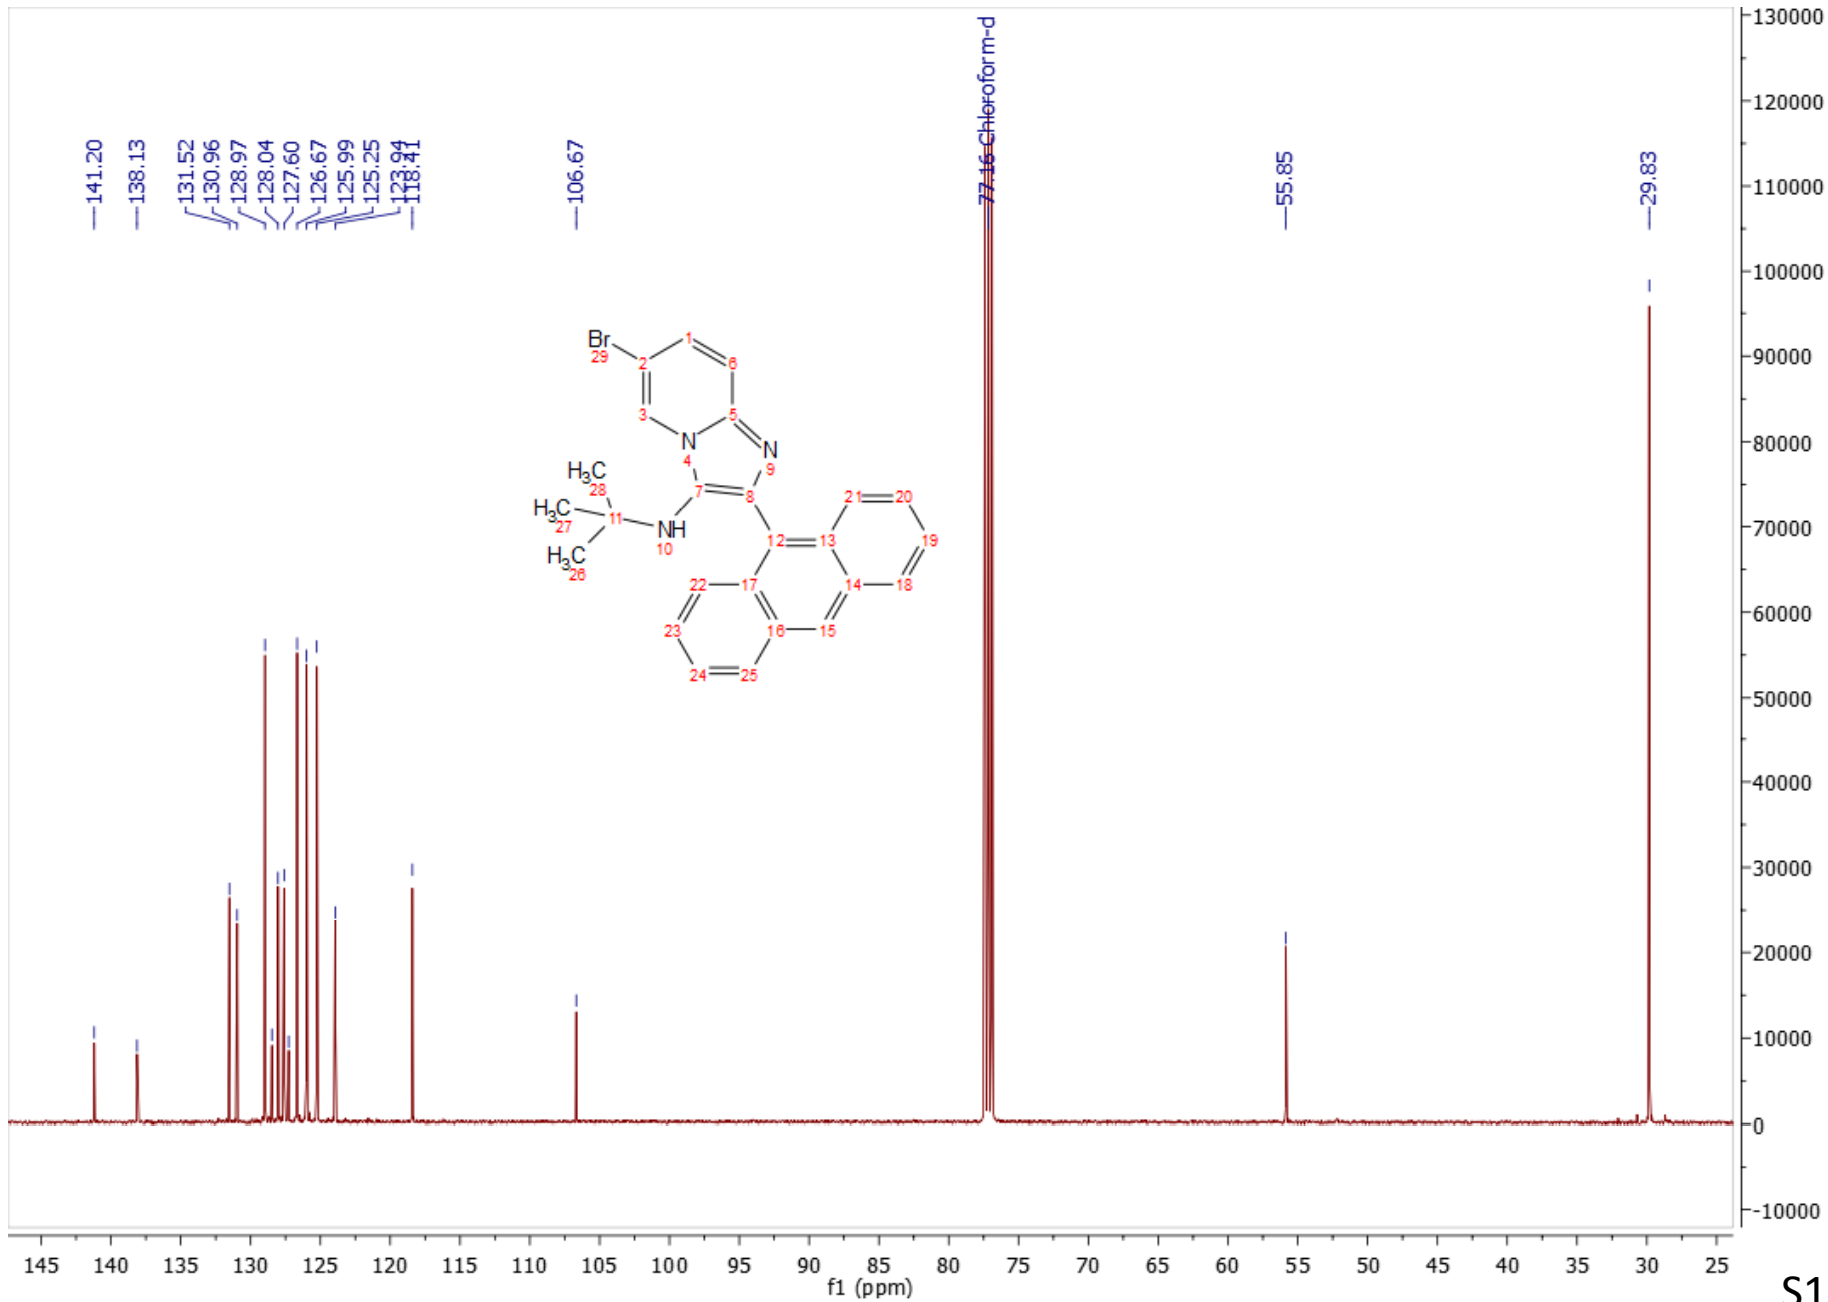

# 15 LC-MS

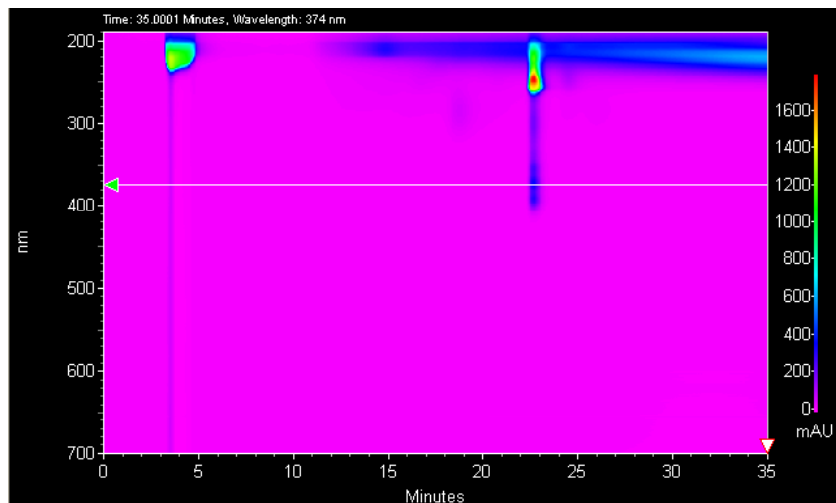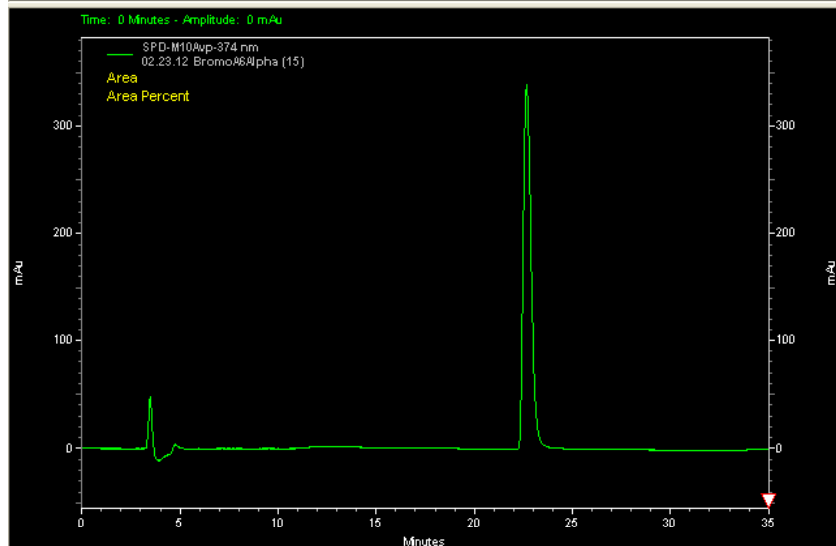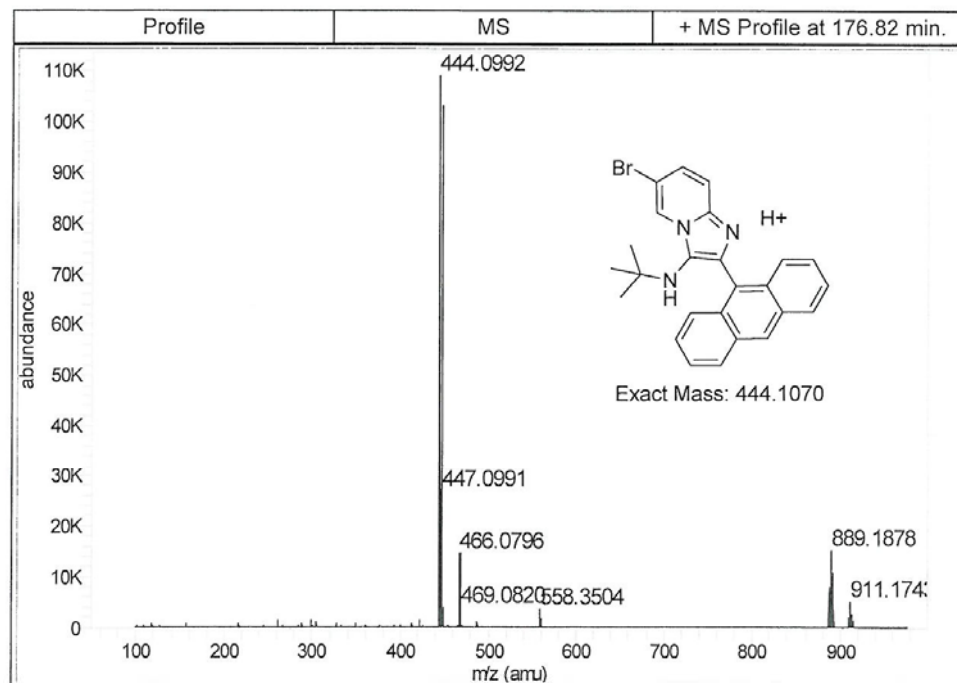

# 16 <sup>1</sup>H Spectrum

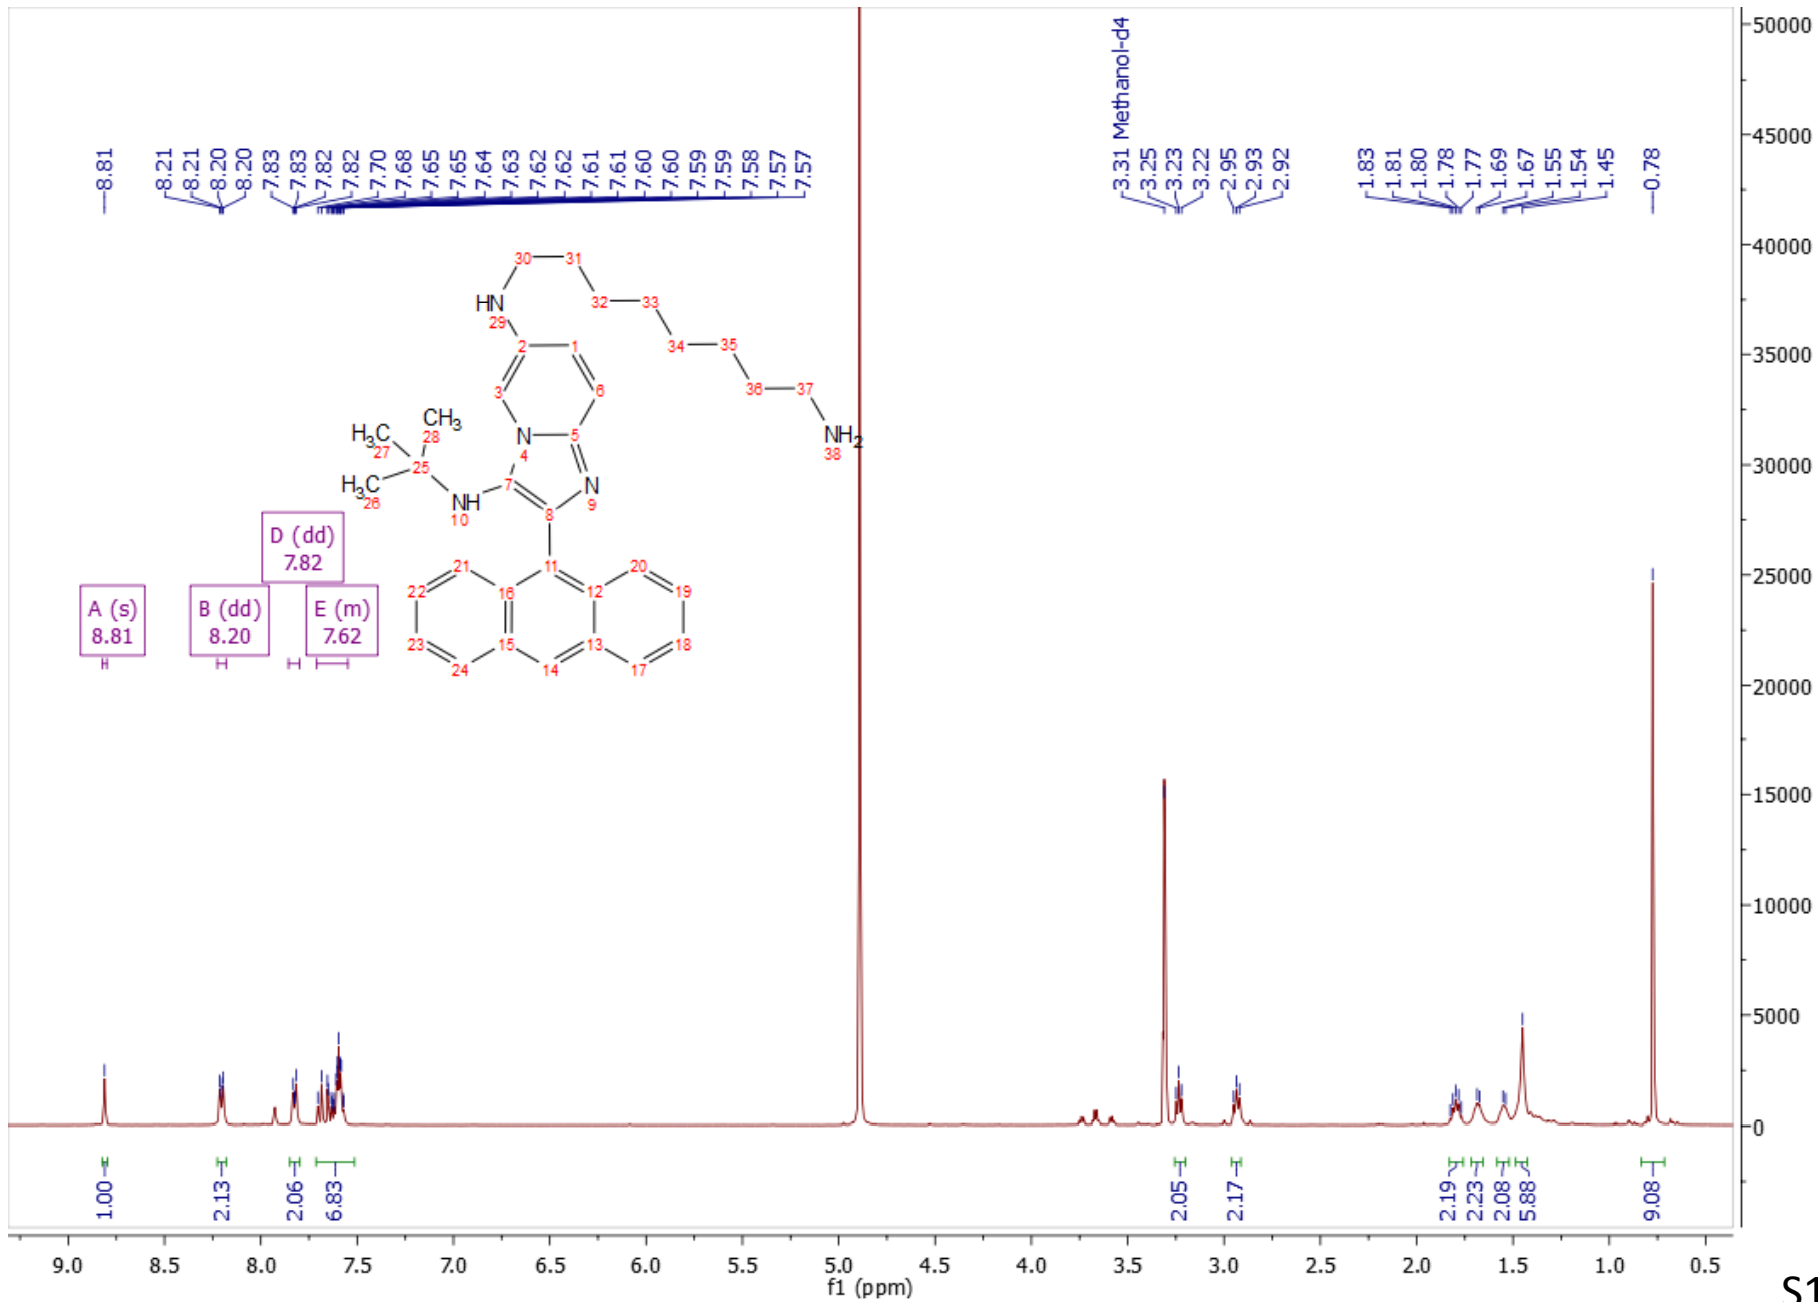



# 16 <sup>13</sup>C Spectrum

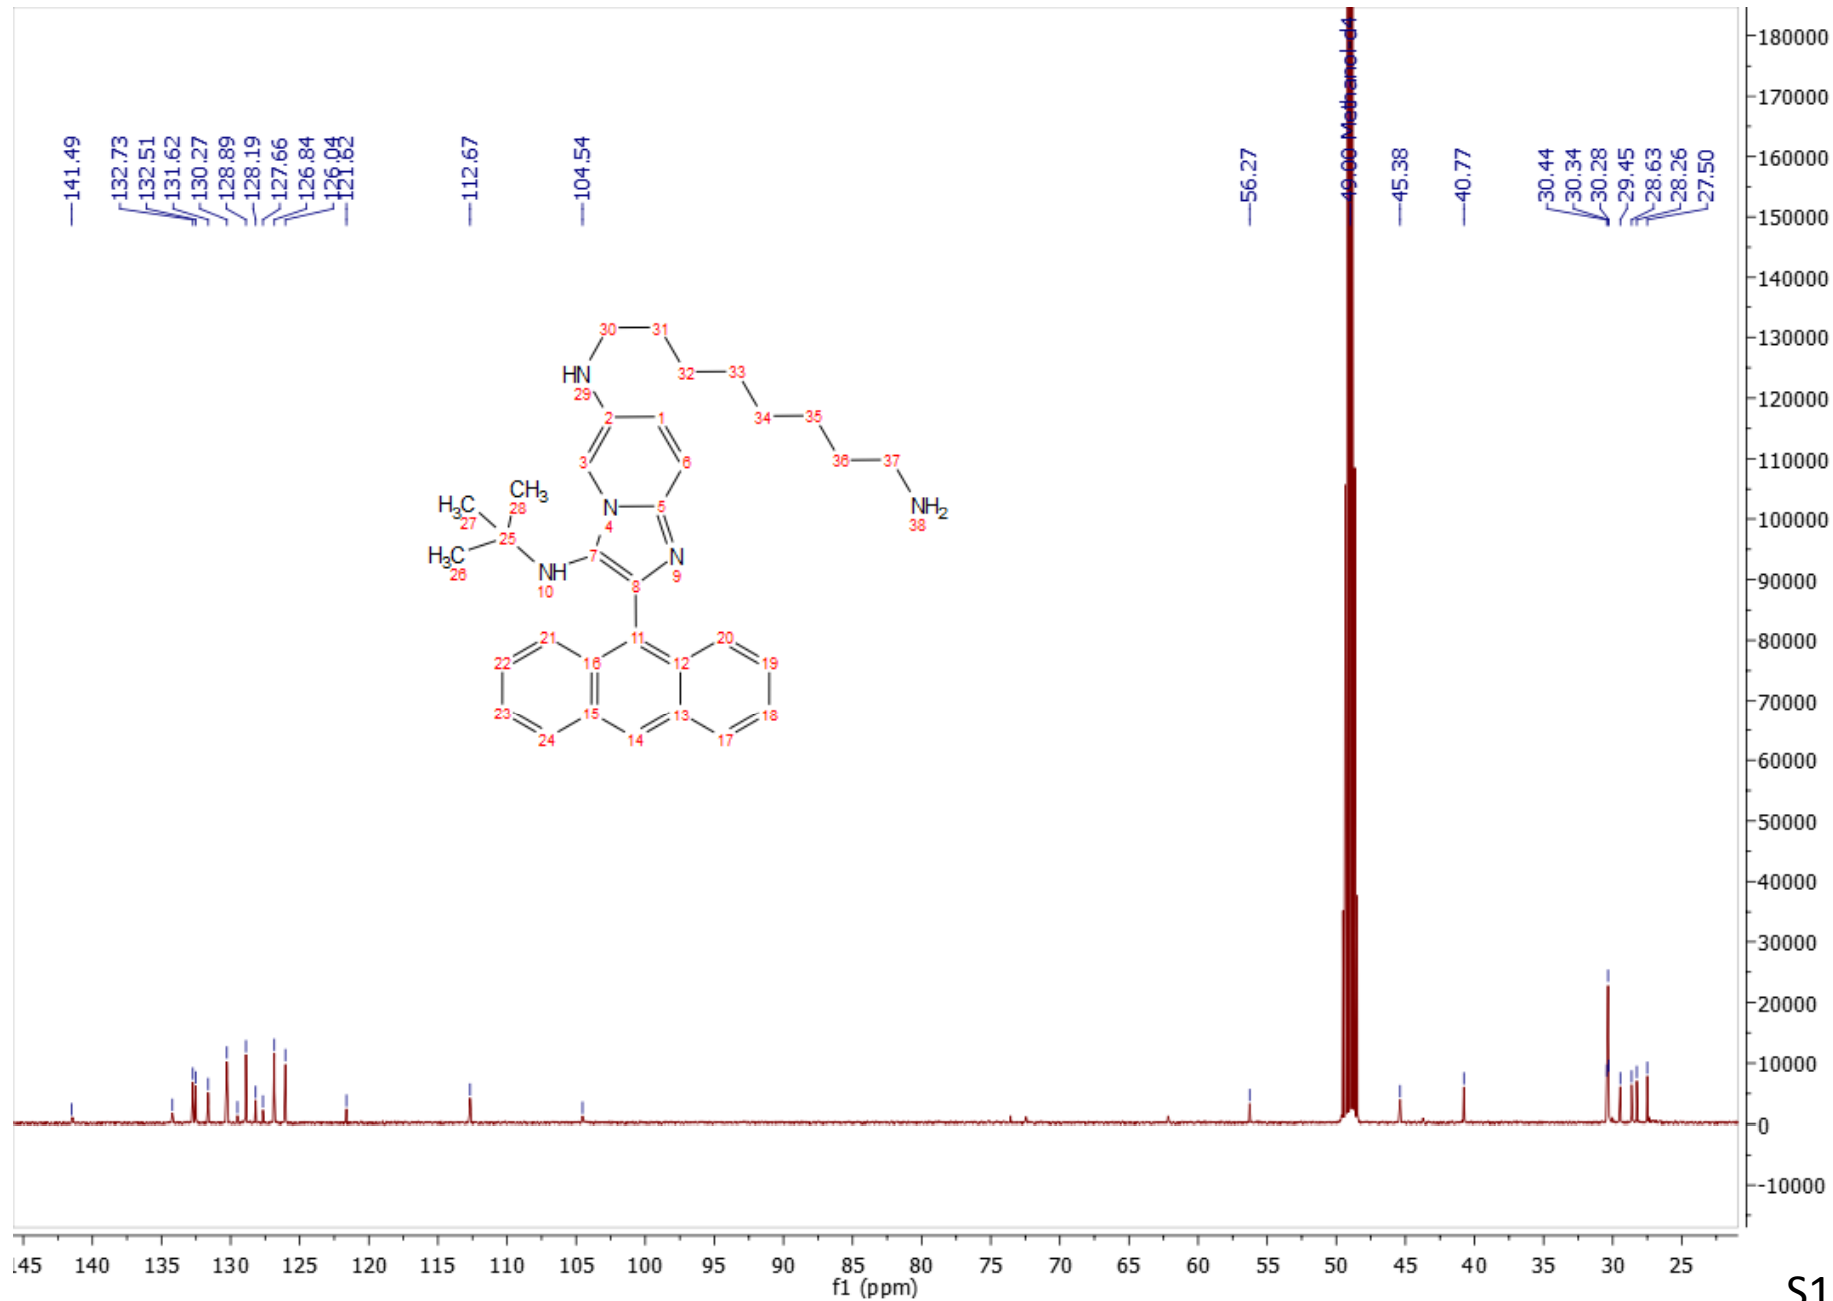

# 16 LC-MS

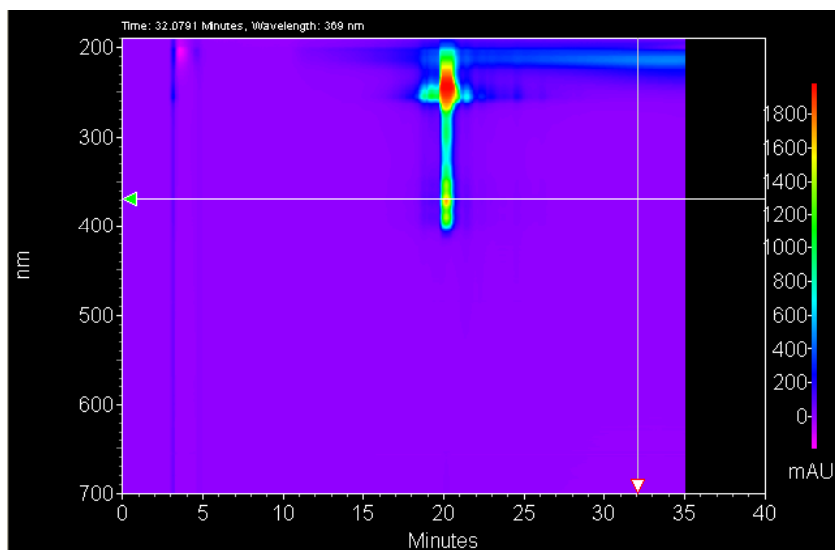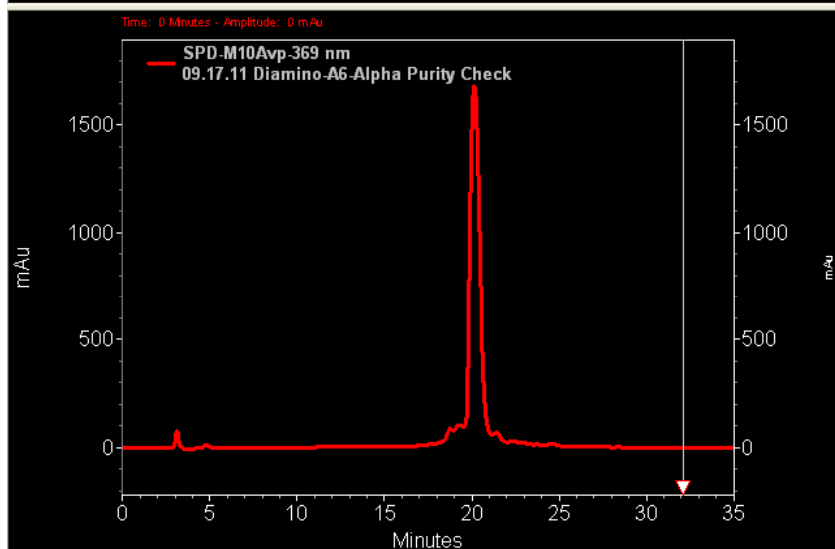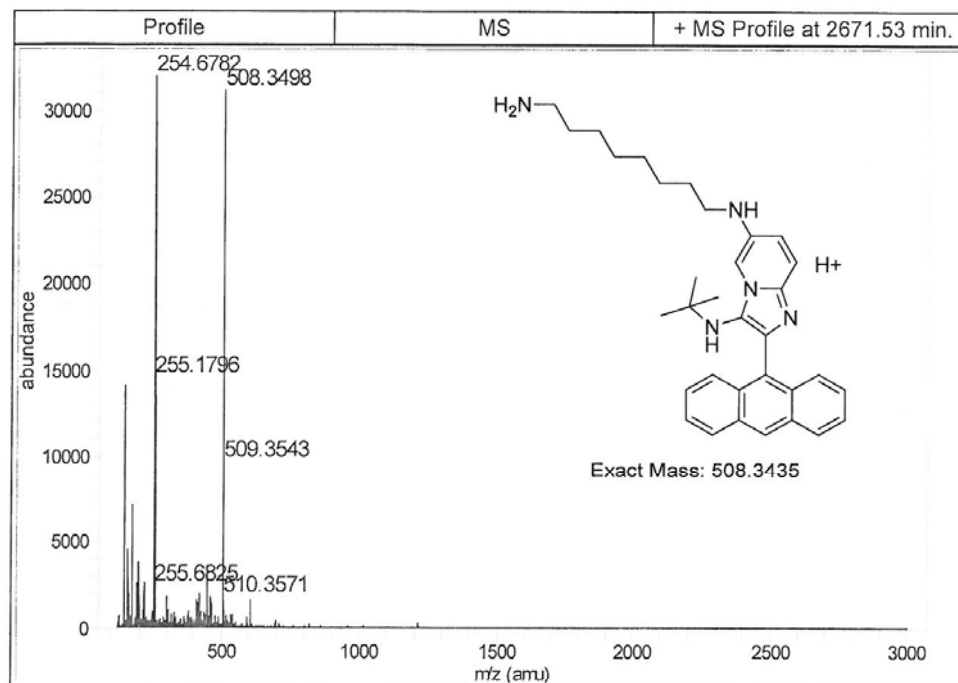

MIC of compounds **1g** and **2g** using  
Coagulase Negative Staphylococcus (*S.epidermidis*) ATCC: 35983

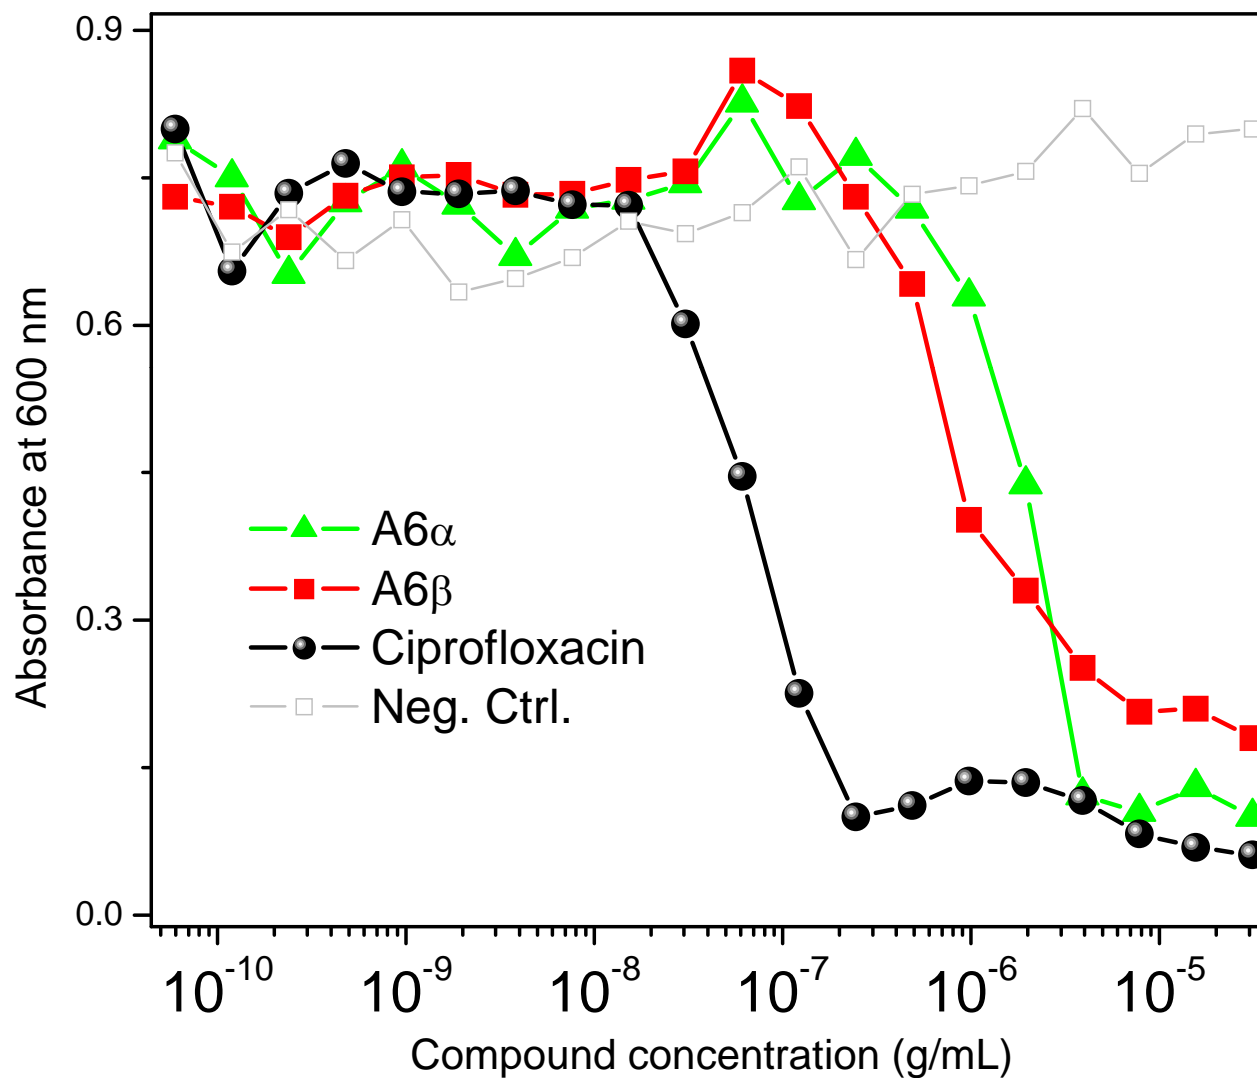

# Compound 1g

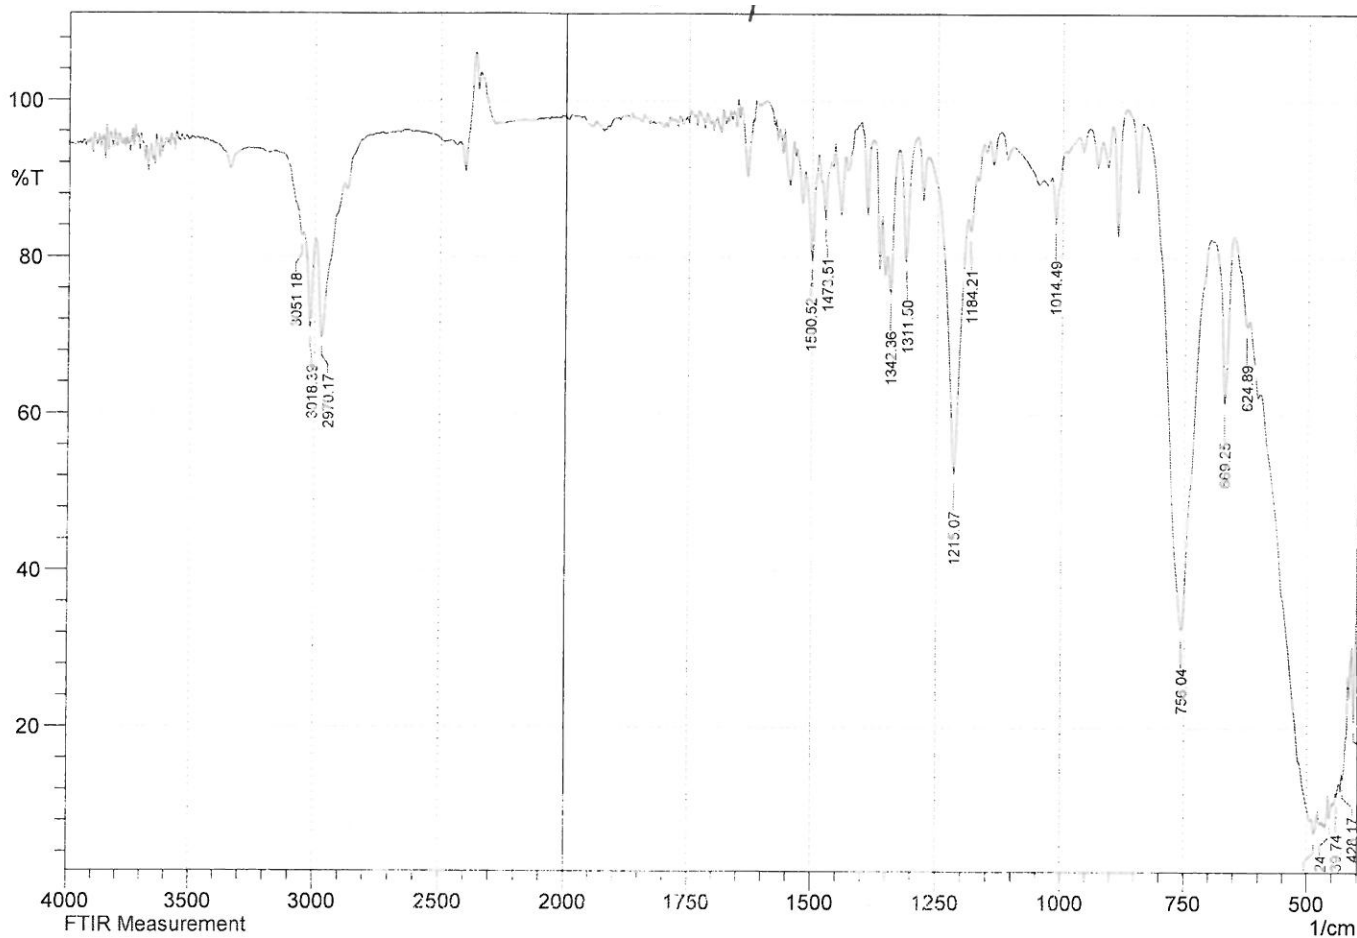

|    | Peak    | Height | Corr. Height | Base (H) | Base (L) | Area   | Corr. Area |
|----|---------|--------|--------------|----------|----------|--------|------------|
| 1  | 406.95  | 79.101 | 15.91        | 410.81   | 399.24   | 6.091  | 1.544      |
| 2  | 428.17  | 86.357 | 2.592        | 430.1    | 418.52   | 8.715  | 0.751      |
| 3  | 439.74  | 89.585 | 1.305        | 443.6    | 435.88   | 7.07   | 0.023      |
| 4  | 453.24  | 91.339 | 2.299        | 457.1    | 449.38   | 7.94   | 0.493      |
| 5  | 486.03  | 93.435 | 1.992        | 489.89   | 480.24   | 10.908 | 0.597      |
| 6  | 624.89  | 28.776 | 2.655        | 651.89   | 619.11   | 3.825  | 0.133      |
| 7  | 669.25  | 38.563 | 20.924       | 690.47   | 653.82   | 4.814  | 1.722      |
| 8  | 756.04  | 67.461 | 56.001       | 837.05   | 698.18   | 27.035 | 20.269     |
| 9  | 1014.49 | 15.562 | 6.386        | 1020.27  | 995.2    | 1.215  | 0.298      |
| 10 | 1184.21 | 16.669 | 3.046        | 1188.07  | 1172.64  | 0.98   | 0.127      |
| 11 | 1215.07 | 47.508 | 34.959       | 1267.14  | 1190     | 9.363  | 5.326      |
| 12 | 1311.5  | 20.583 | 14.967       | 1325.01  | 1290.29  | 1.702  | 0.867      |
| 13 | 1342.36 | 24.571 | 8.366        | 1348.15  | 1326.93  | 1.534  | 0.316      |
| 14 | 1473.51 | 15.27  | 7.827        | 1487.01  | 1461.94  | 1.21   | 0.368      |
| 15 | 1500.52 | 20.349 | 11.595       | 1512.09  | 1488.94  | 1.516  | 0.601      |
| 16 | 2970.17 | 30.249 | 13.912       | 2993.32  | 2881.45  | 10.805 | 3.333      |
| 17 | 3018.39 | 29.063 | 11.697       | 3043.46  | 2995.25  | 5.214  | 1.22       |
| 18 | 3051.18 | 17.32  | 1.013        | 3128.32  | 3045.39  | 4.444  | 0.056      |

# Compound 5e

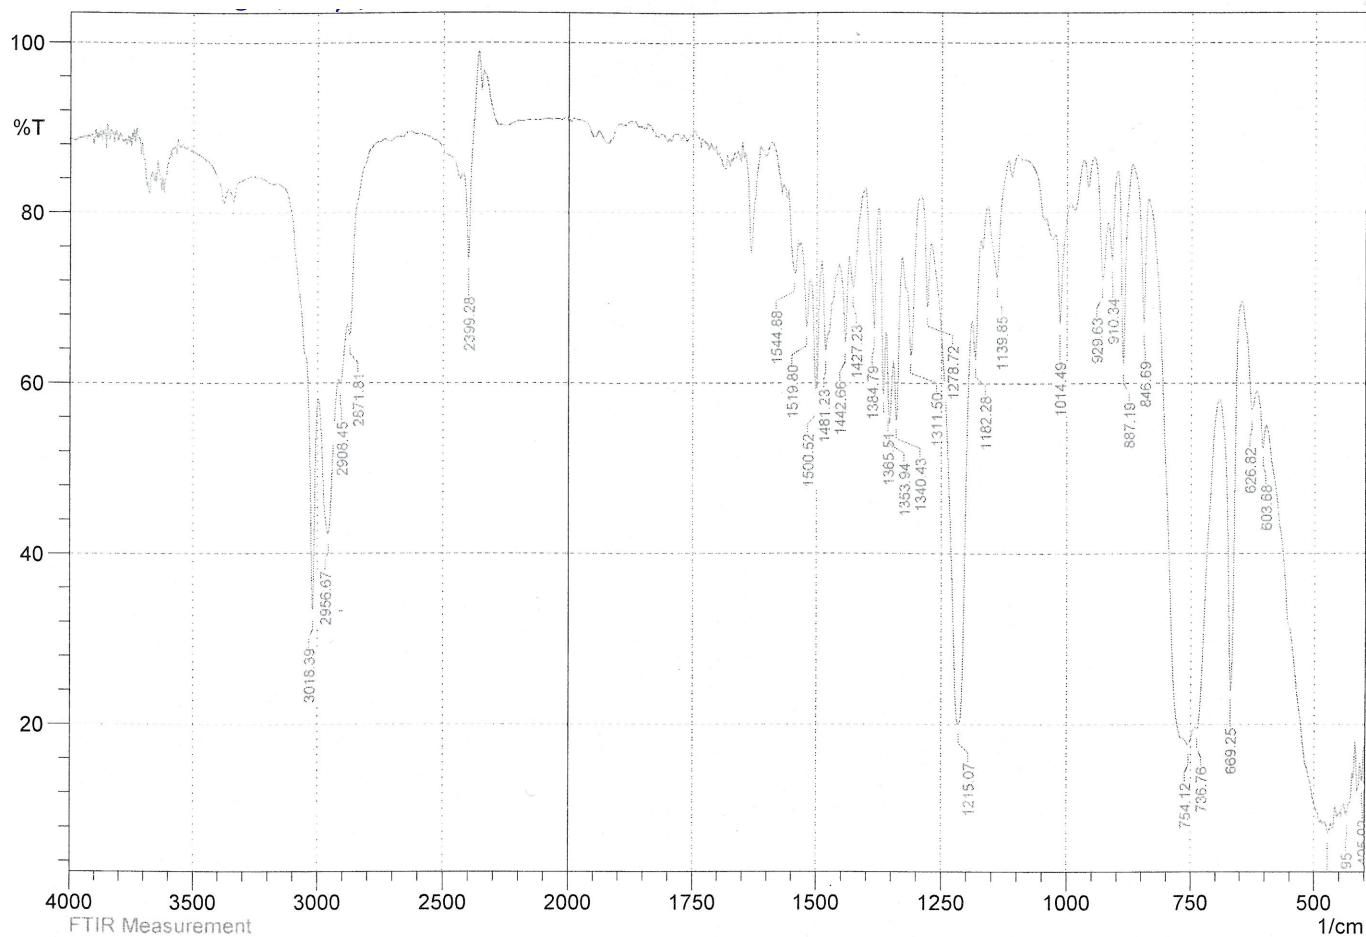

|    | Peak    | Height | Corr. Height | Base (H) | Base (L) | Area   | Corr. Area |
|----|---------|--------|--------------|----------|----------|--------|------------|
| 1  | 405.02  | 86.723 | 2.32         | 406.95   | 401.17   | 4.781  | 0.237      |
| 2  | 433.95  | 90.583 | 2.715        | 439.74   | 424.31   | 14.908 | 1.07       |
| 3  | 472.53  | 92.673 | 1.26         | 478.31   | 466.74   | 12.759 | 0.412      |
| 4  | 603.68  | 47.489 | 3.261        | 617.18   | 599.82   | 4.43   | 0.16       |
| 5  | 626.82  | 43.128 | 5.018        | 646.11   | 619.11   | 5.668  | 0.358      |
| 6  | 669.25  | 76.009 | 40.155       | 692.4    | 648.04   | 14.296 | 5.668      |
| 7  | 736.76  | 80.475 | 3.301        | 740.61   | 694.33   | 20.152 | 0.488      |
| 8  | 754.12  | 82.407 | 1.355        | 765.69   | 740.61   | 18.413 | 0.35       |
| 9  | 846.69  | 33.009 | 15.447       | 867.91   | 838.98   | 3.082  | 0.784      |
| 10 | 887.19  | 37.809 | 23.019       | 898.77   | 869.84   | 3.289  | 1.294      |
| 11 | 910.34  | 25.653 | 6.591        | 916.12   | 900.7    | 1.548  | 0.224      |
| 12 | 929.63  | 27.873 | 9.771        | 946.98   | 918.05   | 2.987  | 0.558      |
| 13 | 1014.49 | 33.062 | 11.497       | 1022.2   | 993.27   | 3.503  | 0.609      |
| 14 | 1139.85 | 27.649 | 10.753       | 1157.21  | 1118.64  | 3.996  | 0.965      |
| 15 | 1182.28 | 36.984 | 7.849        | 1188.07  | 1172.64  | 2.517  | 0.362      |
| 16 | 1215.07 | 80.009 | 50.186       | 1269.07  | 1190     | 27.372 | 15.883     |
| 17 | 1278.72 | 31.111 | 9.781        | 1290.29  | 1271     | 2.367  | 0.389      |
| 18 | 1311.5  | 36.628 | 14.419       | 1326.93  | 1292.22  | 4.873  | 1.199      |
| 19 | 1340.43 | 44.293 | 9.155        | 1344.29  | 1328.86  | 2.961  | 0.451      |
| 20 | 1353.94 | 44.905 | 9.202        | 1359.72  | 1346.22  | 3.101  | 0.467      |
| 21 | 1365.51 | 41.256 | 11.334       | 1375.15  | 1361.65  | 2.413  | 0.477      |
| 22 | 1384.79 | 33.544 | 14.715       | 1402.15  | 1377.08  | 3.185  | 0.964      |
| 23 | 1427.23 | 28.755 | 4.831        | 1433.01  | 1404.08  | 3.309  | 0.324      |
| 24 | 1442.66 | 35.345 | 9.829        | 1454.23  | 1434.94  | 2.945  | 0.473      |
| 25 | 1481.23 | 36.287 | 9.969        | 1488.94  | 1461.94  | 4.527  | 0.87       |
| 26 | 1500.52 | 41.492 | 14.368       | 1512.09  | 1490.87  | 3.784  | 0.868      |
| 27 | 1519.8  | 33.421 | 7.016        | 1529.45  | 1514.02  | 2.338  | 0.303      |
| 28 | 1544.88 | 27.064 | 6.151        | 1556.45  | 1537.16  | 2.362  | 0.422      |
| 29 | 2399.28 | 25.528 | 15.114       | 2420.5   | 2358.78  | 3.911  | 1.611      |
| 30 | 2871.81 | 34.336 | 2.516        | 2879.52  | 2756.09  | 10.737 | 0.156      |
| 31 | 2908.45 | 40.106 | 1.66         | 2914.24  | 2881.45  | 6.589  | 0.195      |
| 32 | 2956.67 | 57.668 | 16.933       | 2995.25  | 2916.17  | 23.608 | 5.669      |
| 33 | 3018.39 | 66.734 | 28.12        | 3161.11  | 2997.17  | 28.516 | 4.746      |

# Compound 7c

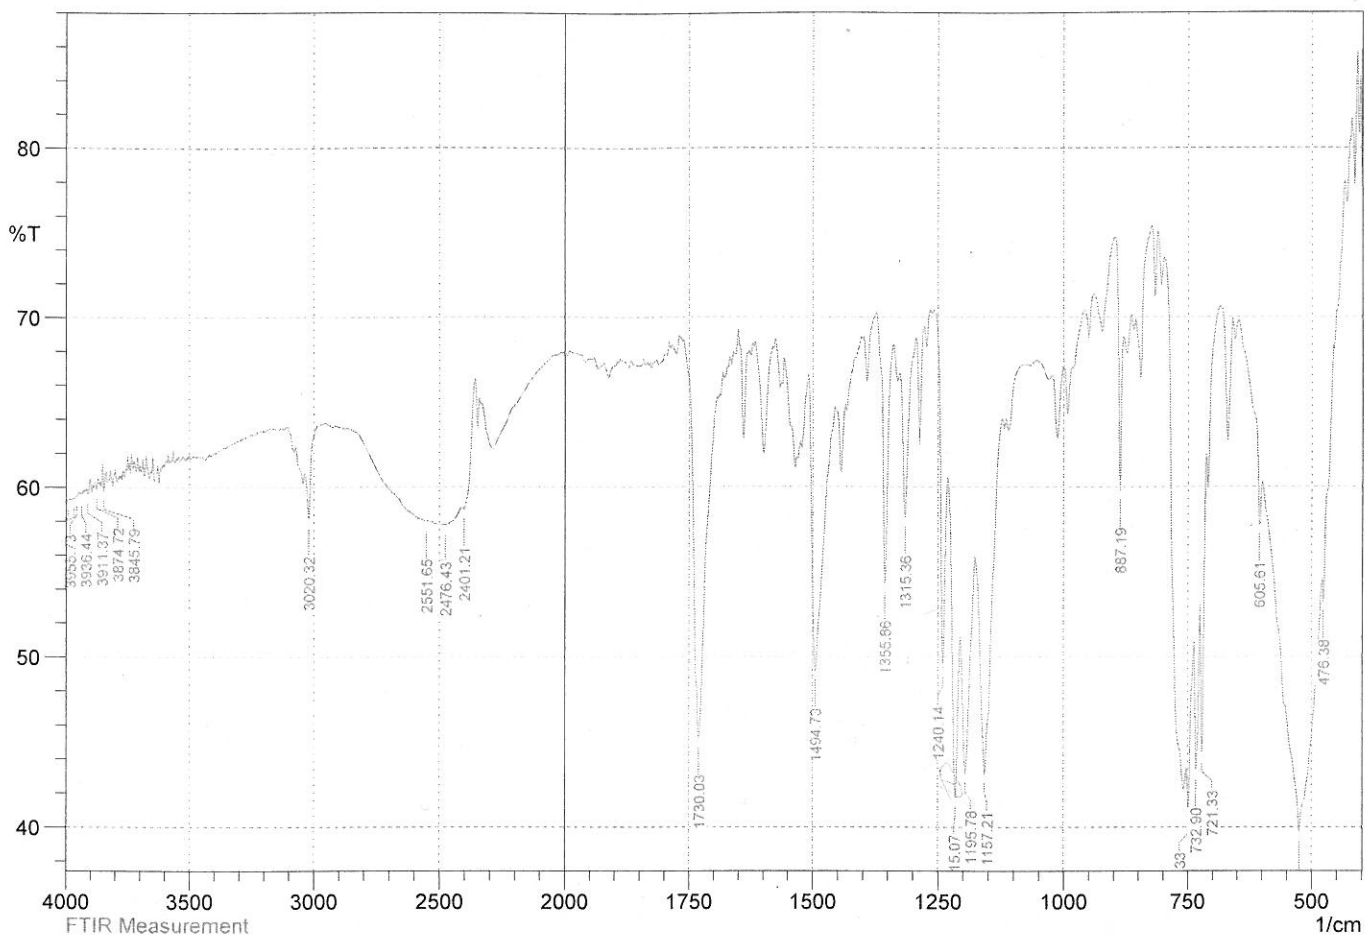

|    | Peak    | Height | Corr. Height | Base (H) | Base (L) | Area   | Corr. Area |
|----|---------|--------|--------------|----------|----------|--------|------------|
| 1  | 476.38  | 46.798 | 2.389        | 478.31   | 435.88   | 7.612  | 0.094      |
| 2  | 524.6   | 60.294 | 10.072       | 551.6    | 480.24   | 24.93  | 3.839      |
| 3  | 605.61  | 42.238 | 3.654        | 648.04   | 599.82   | 9.057  | 0.125      |
| 4  | 721.33  | 55.628 | 7.695        | 723.26   | 713.61   | 2.725  | 0.344      |
| 5  | 732.9   | 56.646 | 8.204        | 736.76   | 725.18   | 3.789  | 0.511      |
| 6  | 748.33  | 59.288 | 4.604        | 752.19   | 738.69   | 4.653  | 0.234      |
| 7  | 887.19  | 40.203 | 11.25        | 896.84   | 881.41   | 2.658  | 0.404      |
| 8  | 1157.21 | 56.863 | 15.215       | 1174.57  | 1124.42  | 14.131 | 2.879      |
| 9  | 1195.78 | 56.787 | 8.696        | 1203.5   | 1176.5   | 8.504  | 1.108      |
| 10 | 1215.07 | 58.2   | 12.928       | 1230.5   | 1205.43  | 7.689  | 1.231      |
| 11 | 1240.14 | 50.656 | 14.079       | 1255.57  | 1232.43  | 5.233  | 0.864      |
| 12 | 1315.36 | 41.832 | 9.159        | 1325.01  | 1294.15  | 5.927  | 0.715      |
| 13 | 1355.86 | 45.641 | 14.757       | 1371.29  | 1340.43  | 6.072  | 1.109      |
| 14 | 1494.73 | 50.802 | 16.906       | 1508.23  | 1456.16  | 12.62  | 3.087      |
| 15 | 1730.03 | 54.718 | 21.657       | 1760.89  | 1695.31  | 15.712 | 4.2        |
| 16 | 2401.21 | 41.341 | 1.067        | 2407     | 2360.71  | 9.867  | 0.444      |
| 17 | 2476.43 | 42.223 | 0.069        | 2480.29  | 2408.93  | 16.803 | 0.086      |
| 18 | 2551.65 | 42.031 | 0.034        | 2565.15  | 2547.79  | 4.107  | 0.004      |
| 19 | 3020.32 | 41.839 | 3.497        | 3035.75  | 2985.6   | 10.621 | 0.326      |
| 20 | 3845.79 | 40.202 | 1.37         | 3851.58  | 3838.08  | 2.958  | 0.07       |
| 21 | 3874.72 | 40.134 | 0.572        | 3882.44  | 3868.94  | 2.978  | 0.025      |
| 22 | 3911.37 | 40.399 | 0.464        | 3915.23  | 3901.73  | 3.004  | 0.032      |
| 23 | 3936.44 | 40.502 | 0.242        | 3940.3   | 3930.66  | 2.166  | 0.011      |
| 24 | 3955.73 | 40.566 | 0.099        | 3959.59  | 3948.01  | 2.607  | 0.005      |
| 25 | 3967.3  | 40.677 | 0.059        | 3971.16  | 3959.59  | 2.621  | 0.004      |
| 26 | 3990.45 | 40.742 | 0.011        | 3992.37  | 3980.8   | 2.628  | 0.001      |
